# Supplementary material for: Proteomics of intracellular Salmonella enterica reveals roles of Salmonella pathogenicity island 2 in metabolism and antioxidant defense
Source: PLoS Pathog. 2019 Apr 22;15(4):e1007741. doi: 10.1371/journal.ppat.1007741 (PMC6497321; doi:10.1371/journal.ppat.1007741)
Supplement: S1 Table — (XLSX) [file ppat.1007741.s001.xlsx]

## Sheet: Tabelle1
Accession	Entry	Description	ΔssaV replicate 1 normalized abundance	ΔssaV replicate 2 normalized abundance	ΔssaV replicate 3 normalized abundance	average ΔssaV normalized abundance	ΔssaV STABW	WT replicate 1 normalized abundance	WT replicate 2 normalized abundance	WT replicate 3 normalized abundance	WT replicate 4 normalized abundance	average WT normalized abundance	WT STABW	ratio ΔssaV/WT	two-tailed t-test p-value ΔssaV/WT	i-value with 5% FDR	ΔsseF replicate 1 normalized abundance	ΔsseF replicate 2 normalized abundance	ΔsseF replicate 3 normalized abundance	Average ΔsseF normalized abundance	ΔsseF STABW	ratio ΔsseF/WT	two-tailed t-test p-value ΔsseF/WT	i-value with 5% FDR
P0A2R4	RPOC_SALTY	DNA-directed RNA polymerase subunit beta' OS=Salmonella typhimurium (strain LT2 / SGSC1412 / ATCC 700720) GN=rpoC PE=3 SV=1	0.117758	0.0454877	0.0485266	0.0705908	0.0408764	0.367839	0.401355	0.403351	0.322398	0.373736	0.0379044	0.188879	0.000159471	0.00200846	0.0290318	0.0230944	0.0446986	0.0322749	0.0111613	0.0863576	2.54234e-05	0.00121951
Q8ZPZ0	Q8ZPZ0_SALTY	Isocitrate dehydrogenase [NADP] OS=Salmonella typhimurium (strain LT2 / SGSC1412 / ATCC 700720) GN=icdA PE=3 SV=1	0.435055	0.213872	0.276204	0.308377	0.114047	0.753919	0.45096	0.580904	0.530518	0.579075	0.128251	0.532534	0.034307	0.0188161	0.0587823	0.0517431	0.0764941	0.0623398	0.0127532	0.107654	0.0010557	0.0075388
Q8ZN60	GUAA_SALTY	GMP synthase [glutamine-hydrolyzing] OS=Salmonella typhimurium (strain LT2 / SGSC1412 / ATCC 700720) GN=guaA PE=3 SV=1	0.0856231	0.0459383	0.037096	0.0562192	0.0258455	0.151429	0.141382	0.153301	0.131089	0.1443	0.010245	0.389599	0.00143366	0.00581395	0.01378	0.0189842	0.0246759	0.0191467	0.00544979	0.132687	7.56083e-06	0.000332594
Q8ZNV2	SYD_SALTY	Aspartate--tRNA ligase OS=Salmonella typhimurium (strain LT2 / SGSC1412 / ATCC 700720) GN=aspS PE=3 SV=1	0.114769	0.0729483	0.0848559	0.0908579	0.0215469	0.215352	0.156748	0.177657	0.161211	0.177742	0.0266365	0.511178	0.00583706	0.00983087	0.0181481	0.0284919	0.0251393	0.0239264	0.00527748	0.134613	0.000204198	0.00299335
P05989	ILVC_SALTY	Ketol-acid reductoisomerase OS=Salmonella typhimurium (strain LT2 / SGSC1412 / ATCC 700720) GN=ilvC PE=2 SV=4	0.120747	0.0587559	0.0702523	0.0832517	0.0329768	0.130807	0.234304	0.241201	0.229495	0.208952	0.0523175	0.398426	0.0153637	0.0143763	0.0367537		0.0227235	0.0297386	0.00992088	0.142323	0.0104956	0.0162971
P06173	RPOB_SALTY	DNA-directed RNA polymerase subunit beta OS=Salmonella typhimurium (strain LT2 / SGSC1412 / ATCC 700720) GN=rpoB PE=3 SV=2	0.141543	0.0662417	0.072985	0.09359	0.0416655	0.529068	0.398363	0.351939	0.338148	0.404379	0.0870252	0.231441	0.0024648	0.00718816	0.066376	0.0506887	0.0699982	0.0623543	0.0102638	0.154197	0.00118987	0.0078714
P0A7Z7	RPOA_SALTY	DNA-directed RNA polymerase subunit alpha OS=Salmonella typhimurium (strain LT2 / SGSC1412 / ATCC 700720) GN=rpoA PE=3 SV=1	0.11621	0.115319	0.144985	0.125505	0.0168762	0.303478	0.239814	0.394346	0.240883	0.29463	0.0728355	0.425973	0.0119219	0.0131078	0.0475262	0.0406041	0.0509767	0.046369	0.00528226	0.15738	0.00222919	0.0101996
P0A249	PT1_SALTY	Phosphoenolpyruvate-protein phosphotransferase OS=Salmonella typhimurium (strain LT2 / SGSC1412 / ATCC 700720) GN=ptsI PE=3 SV=1	0.203979	0.114517	0.121241	0.146579	0.0498234	0.360617	0.305013	0.348471	0.297095	0.327799	0.0314446	0.447163	0.00190572	0.00634249	0.0491476	0.0398905	0.0703035	0.0531139	0.0155896	0.162032	3.73477e-05	0.00155211
P0A2E1	GLYA_SALTY	Serine hydroxymethyltransferase OS=Salmonella typhimurium (strain LT2 / SGSC1412 / ATCC 700720) GN=glyA PE=1 SV=1	0.0713439	0.082634	0.107882	0.0872868	0.0187083	0.261933	0.228505	0.272118	0.28265	0.261302	0.0234434	0.334046	0.000134472	0.00147992		0.0506391	0.0419029	0.046271	0.00617741	0.177079	0.000268411	0.00365854
Q8ZM63	Q8ZM63_SALTY	Transketolase OS=Salmonella typhimurium (strain LT2 / SGSC1412 / ATCC 700720) GN=tktA PE=3 SV=1	0.142895	0.102487	0.130842	0.125408	0.020745	0.302976	0.263278	0.250709	0.237437	0.2636	0.0282917	0.47575	0.000867812	0.00422833	0.0284797	0.0520368	0.0655327	0.048683	0.0187528	0.184685	9.51735e-05	0.00199557
Q8ZMK6	SYA_SALTY	Alanine--tRNA ligase OS=Salmonella typhimurium (strain LT2 / SGSC1412 / ATCC 700720) GN=alaS PE=3 SV=1	0.0460702	0.0243288	0.0260544	0.0321511	0.0120851	0.0758353	0.0759963	0.0761621	0.0680698	0.0740159	0.00396629	0.434381	0.00115644	0.005074		0.0137371	0.0139953	0.0138662	0.000182555	0.187341	3.53641e-05	0.00144124
Q8ZRB9	Q8ZRB9_SALTY	Lon protease OS=Salmonella typhimurium (strain LT2 / SGSC1412 / ATCC 700720) GN=lon PE=2 SV=1	0.0791944	0.0348319	0.055908	0.0566447	0.0221904	0.139982	0.184839	0.187645	0.200452	0.178229	0.0263884	0.317819	0.00136067	0.00560254	0.025224	0.0448339	0.03748	0.035846	0.00990655	0.201123	0.000328407	0.00443459
Q8ZMD2	Q8ZMD2_SALTY	Putative nucleotide binding OS=Salmonella typhimurium (strain LT2 / SGSC1412 / ATCC 700720) GN=ygdH PE=4 SV=1	0.0197472		0.0198332	0.0197902	6.07794e-05	0.0760269	0.0768387	0.083699	0.0754143	0.0779947	0.00384736	0.253738	3.56622e-05	0.000528541	0.0197139	0.0105641	0.0189339	0.016404	0.0050725	0.210321	8.68246e-06	0.000443459
Q08016	OTC_SALTY	Ornithine carbamoyltransferase OS=Salmonella typhimurium (strain LT2 / SGSC1412 / ATCC 700720) GN=argI PE=3 SV=3	0.0223351		0.0358359	0.0290855	0.00954651	0.0370416	0.0422933	0.0560939	0.0571512	0.048145	0.0100304	0.604122	0.0905692	0.0255814		0.00617063	0.0140954	0.010133	0.00560363	0.210468	0.00859185	0.0155211
Q8ZRJ5	Q8ZRJ5_SALTY	Aminoacyl-histidine dipeptidase (Peptidase D) OS=Salmonella typhimurium (strain LT2 / SGSC1412 / ATCC 700720) GN=pepD PE=4 SV=1	0.0995982	0.0693811	0.0831913	0.0840568	0.0151271	0.170011	0.1412	0.151734	0.148218	0.152791	0.0122871	0.550143	0.00114491	0.00496829	0.0310982	0.028031	0.0380378	0.032389	0.00512677	0.211983	1.91878e-05	0.00110865
Q93DX1	Q93DX1_SALTY	Putative acetyl-CoA hydrolase OS=Salmonella typhimurium (strain LT2 / SGSC1412 / ATCC 700720) GN=STM3118 PE=4 SV=1	0.576148	0.49242	0.608667	0.559078	0.0599735	0.472915	0.28906	0.28903	0.325728	0.344183	0.0875458	1.62436	0.0152011	0.0142706	0.0555355	0.0802455	0.0907396	0.0755068	0.0180741	0.21938	0.00372167	0.0117517
P65215	KDSA_SALTY	2-dehydro-3-deoxyphosphooctonate aldolase OS=Salmonella typhimurium (strain LT2 / SGSC1412 / ATCC 700720) GN=kdsA PE=3 SV=1	0.140651	0.151992	0.180193	0.157612	0.020361	0.127486	0.119309	0.148422	0.140081	0.133824	0.01295	1.17775	0.114675	0.0273784		0.0199537	0.0391118	0.0295327	0.0135469	0.220683	0.000778184	0.00620843
Q8ZPV9	Q8ZPV9_SALTY	Putative enzyme related to aldose 1-epimerase OS=Salmonella typhimurium (strain LT2 / SGSC1412 / ATCC 700720) GN=yeaD PE=1 SV=1	0.0611963	0.0307681	0.0829695	0.0583113	0.02622	0.126386	0.107328	0.0800113	0.0781352	0.0979651	0.0231731	0.595226	0.0870011	0.0251586		0.0182401	0.0250915	0.0216658	0.0048447	0.221158	0.0120766	0.017184
O52765	SYH_SALTY	Histidine--tRNA ligase OS=Salmonella typhimurium (strain LT2 / SGSC1412 / ATCC 700720) GN=hisS PE=1 SV=4	0.0239907		0.024966	0.0244783	0.000689621	0.0652736	0.0741578	0.0792194	0.0609755	0.0699066	0.00828714	0.350158	0.00187178	0.00623679	0.0255024	0.00564657		0.0155745	0.0140402	0.22279	0.00334309	0.0113082
P55900	SERC_SALTY	Phosphoserine aminotransferase OS=Salmonella typhimurium (strain LT2 / SGSC1412 / ATCC 700720) GN=serC PE=1 SV=2	0.165651	0.0828555	0.10119	0.116565	0.0434866	0.164185	0.202341	0.224359	0.205882	0.199192	0.0252554	0.585192	0.0238529	0.0169133	0.0410066	0.0402387	0.0559756	0.0457403	0.00887235	0.229629	0.00018182	0.00288248
P40732	ARGD_SALTY	Acetylornithine/succinyldiaminopimelate aminotransferase OS=Salmonella typhimurium (strain LT2 / SGSC1412 / ATCC 700720) GN=argD PE=1 SV=3	0.0947566	0.0705498	0.0795216	0.0816093	0.0122377	0.112781	0.101029	0.0939408	0.106012	0.103441	0.0079566	0.788947	0.0342238	0.0187104	0.0241996	0.0236476	0.0240004	0.0239492	0.000279566	0.231526	1.33415e-05	0.000886918
P14845	CARA_SALTY	Carbamoyl-phosphate synthase small chain OS=Salmonella typhimurium (strain LT2 / SGSC1412 / ATCC 700720) GN=carA PE=3 SV=2	0.0786464	0.0417448	0.0643903	0.0615938	0.0186091	0.127075	0.150615	0.158237	0.142112	0.14451	0.0133594	0.426226	0.000961847	0.00443975	0.0349615	0.0328204		0.0338909	0.00151404	0.234524	0.000385883	0.00476718
Q7CQF2	Q7CQF2_SALTY	UTP--glucose-1-phosphate uridylyltransferase OS=Salmonella typhimurium (strain LT2 / SGSC1412 / ATCC 700720) GN=galU PE=3 SV=1	0.0529349		0.0371382	0.0450366	0.01117	0.0793984	0.0960748	0.0829935	0.0990946	0.0893904	0.00965425	0.503819	0.00701327	0.0105708	0.026084		0.016223	0.0211535	0.00697282	0.236642	0.000961864	0.00720621
P0A1P6	GLNA_SALTY	Glutamine synthetase OS=Salmonella typhimurium (strain LT2 / SGSC1412 / ATCC 700720) GN=glnA PE=1 SV=2	0.0566738	0.0501854	0.0750587	0.0606393	0.0129021	0.276277	0.253705	0.263616	0.128168	0.230441	0.0688056	0.263144	0.00914369	0.0117336	0.0537681	0.0420959	0.0720457	0.0559699	0.0150958	0.242881	0.00833591	0.0152993
P65882	PURA_SALTY	Adenylosuccinate synthetase OS=Salmonella typhimurium (strain LT2 / SGSC1412 / ATCC 700720) GN=purA PE=3 SV=2	0.0977454	0.0570143	0.068811	0.0745236	0.0209578	0.148856	0.135937	0.150179	0.166591	0.150391	0.0125668	0.495533	0.00179168	0.00602537	0.0305248	0.0278056	0.0530668	0.0371324	0.0138664	0.246906	9.41447e-05	0.0018847
P63411	ACKA_SALTY	Acetate kinase OS=Salmonella typhimurium (strain LT2 / SGSC1412 / ATCC 700720) GN=ackA PE=1 SV=1	0.0809786	0.112027	0.0774635	0.0901565	0.019022	0.187061	0.170291	0.219359	0.18785	0.19114	0.0204814	0.471677	0.00116714	0.00528541	0.053576	0.0372074	0.0516977	0.0474937	0.00895754	0.248476	0.000100572	0.00221729
Q7CPU6	Q7CPU6_SALTY	Fructose-bisphosphate aldolase OS=Salmonella typhimurium (strain LT2 / SGSC1412 / ATCC 700720) GN=fba PE=4 SV=1	0.4427	0.395594	0.394994	0.411096	0.0273717	0.565106	0.572326	0.555958	0.539149	0.558135	0.0143198	0.736554	0.000234102	0.002537	0.16288	0.129705	0.130277	0.140954	0.0189906	0.252544	4.5162e-07	0.000110865
Q8ZNN4	SYM_SALTY	Methionine--tRNA ligase OS=Salmonella typhimurium (strain LT2 / SGSC1412 / ATCC 700720) GN=metG PE=3 SV=3	0.0563314		0.0414715	0.0489014	0.0105075		0.0733716	0.0835657	0.0850768	0.0806714	0.0063668	0.606181	0.0223532	0.0165962	0.024189	0.0178338		0.0210114	0.00449384	0.260456	0.00150642	0.00875831
Q8ZRT2	Q8ZRT2_SALTY	Pyruvate dehydrogenase E1 component OS=Salmonella typhimurium (strain LT2 / SGSC1412 / ATCC 700720) GN=aceE PE=4 SV=1	0.305233	0.246015	0.268512	0.273254	0.0298923	0.632209	0.496558	0.556946	0.469908	0.538905	0.0720763	0.507053	0.00198883	0.00655391	0.145065	0.148969	0.165158	0.153064	0.0106543	0.284028	0.000285167	0.00399113
P77983	KPYK1_SALTY	Pyruvate kinase I OS=Salmonella typhimurium (strain LT2 / SGSC1412 / ATCC 700720) GN=pykF PE=3 SV=2	0.338113	0.190483	0.206186	0.244928	0.0810824	0.262723	0.395799	0.401721	0.396049	0.364073	0.0676219	0.672743	0.0866107	0.0248414	0.107879	0.0800542	0.122349	0.103427	0.021496	0.284084	0.00147579	0.00853659
P37430	NUSA_SALTY	Transcription termination/antitermination protein NusA OS=Salmonella typhimurium (strain LT2 / SGSC1412 / ATCC 700720) GN=nusA PE=3 SV=2	0.0969819	0.0507277	0.0622697	0.0699931	0.0240749	0.148112	0.155911	0.116875	0.118786	0.134921	0.0200047	0.518771	0.0112595	0.0125793	0.0404161	0.0363643	0.0418552	0.0395452	0.00284717	0.293099	0.000491473	0.00509978
P66764	METK_SALTY	S-adenosylmethionine synthase OS=Salmonella typhimurium (strain LT2 / SGSC1412 / ATCC 700720) GN=metK PE=3 SV=2	0.0977855	0.160792	0.095654	0.118077	0.0370074	0.191856	0.142745	0.139458	0.136037	0.152524	0.0263641	0.774155	0.206227	0.032981		0.0454621	0.0450744	0.0452682	0.000274117	0.296794	0.00560127	0.0133038
Q7CPE1	ATPA_SALTY	ATP synthase subunit alpha OS=Salmonella typhimurium (strain LT2 / SGSC1412 / ATCC 700720) GN=atpA PE=3 SV=1	0.454655	0.288547	0.332284	0.358496	0.0861005	0.783401	0.637874	0.684485	0.615589	0.680337	0.0744642	0.526938	0.0031601	0.00782241	0.282053	0.161812	0.189862	0.211242	0.0629069	0.310496	0.000320429	0.00432373
Q8ZQ14	Q8ZQ14_SALTY	3-oxoacyl-[acyl-carrier-protein] synthase 2 OS=Salmonella typhimurium (strain LT2 / SGSC1412 / ATCC 700720) GN=fabF PE=3 SV=1	0.0480014		0.0368478	0.0424246	0.00788685		0.0623046	0.0824794	0.0698755	0.0715532	0.0101915	0.59291	0.0436078	0.0207188	0.0149651		0.0298828	0.022424	0.0105484	0.313389	0.0136796	0.0176275
P00499	HIS1_SALTY	ATP phosphoribosyltransferase OS=Salmonella typhimurium (strain LT2 / SGSC1412 / ATCC 700720) GN=hisG PE=1 SV=1	0.0693157	0.111332	0.0850573	0.0885684	0.0212271	0.0980723	0.0930941	0.101726	0.0927933	0.0964215	0.00428569	0.918554	0.490623	0.0415433	0.0437403	0.0236885	0.0235695	0.0303328	0.0116114	0.314585	0.000121444	0.00232816
Q8ZL95	SYGA_SALTY	Glycine--tRNA ligase alpha subunit OS=Salmonella typhimurium (strain LT2 / SGSC1412 / ATCC 700720) GN=glyQ PE=3 SV=1	0.0495401	0.0395983	0.0468682	0.0453355	0.00514505	0.107156	0.0984785	0.119072	0.119237	0.110986	0.0100759	0.40848	0.000158022	0.00190275	0.044228	0.0323172	0.0283631	0.0349694	0.0082583	0.31508	0.000129301	0.00254989
P58696	SYN_SALTY	Asparagine--tRNA ligase OS=Salmonella typhimurium (strain LT2 / SGSC1412 / ATCC 700720) GN=asnS PE=3 SV=2	0.0951793	0.0712296	0.0721184	0.0795091	0.013578	0.144138	0.158861	0.172472	0.155306	0.157694	0.0116794	0.504197	0.000437222	0.00306554	0.0557707	0.0425158	0.0536627	0.0506497	0.00712258	0.321189	3.50213e-05	0.00133038
Q8ZPC9	ABDH_SALTY	Gamma-aminobutyraldehyde dehydrogenase OS=Salmonella typhimurium (strain LT2 / SGSC1412 / ATCC 700720) GN=prr PE=3 SV=2	0.0808216	0.0419205	0.0494135	0.0573852	0.0206394	0.0787551	0.0754518	0.0568688	0.0751219	0.0715494	0.00992363	0.802036	0.2754	0.0353066	0.0259646		0.0206061	0.0232853	0.00378908	0.325444	0.00318306	0.0108647
Q8ZPY0	Q8ZPY0_SALTY	Putative periplasmic protein OS=Salmonella typhimurium (strain LT2 / SGSC1412 / ATCC 700720) GN=STM1263 PE=4 SV=1	0.201607	0.243701	0.194423	0.213244	0.0266201	0.194671	0.167545	0.207418	0.182622	0.188064	0.0170181	1.13389	0.183759	0.0315011	0.04244	0.0470629	0.0968995	0.0621341	0.0301963	0.330388	0.000855831	0.00631929
Q8ZPZ6	Q8ZPZ6_SALTY	Adenylosuccinate lyase OS=Salmonella typhimurium (strain LT2 / SGSC1412 / ATCC 700720) GN=purB PE=1 SV=1	0.053254	0.0517742	0.0815751	0.0622011	0.0167947	0.170645	0.113445	0.152191	0.142075	0.144589	0.0238954	0.430192	0.00391741	0.00824524	0.0603824	0.044943	0.0383807	0.047902	0.0112954	0.331297	0.00139949	0.00831486
Q8ZL61	LLDD_SALTY	L-lactate dehydrogenase OS=Salmonella typhimurium (strain LT2 / SGSC1412 / ATCC 700720) GN=lldD PE=3 SV=1	0.0411902	0.0406143	0.0410046	0.0409363	0.000293952	0.0682894	0.0993769	0.0865948	0.0782995	0.0831402	0.0131598	0.492377	0.00289521	0.00750529	0.0358771	0.0211077	0.0269217	0.0279688	0.00744019	0.336406	0.00134767	0.00820399
Q8ZRT0	Q8ZRT0_SALTY	Dihydrolipoyl dehydrogenase OS=Salmonella typhimurium (strain LT2 / SGSC1412 / ATCC 700720) GN=lpdA PE=4 SV=1	0.379469	0.270436	0.310455	0.32012	0.0551554	0.462389	0.52301	0.581424	0.501366	0.517047	0.0497101	0.619131	0.00423881	0.00877378	0.157827	0.159323	0.206608	0.174586	0.027742	0.33766	0.000129391	0.00266075
Q8ZPC8	Q8ZPC8_SALTY	Putative gntR family regulatory protein OS=Salmonella typhimurium (strain LT2 / SGSC1412 / ATCC 700720) GN=ydcR PE=4 SV=1	0.0591832	0.0357561	0.0565779	0.0505057	0.0128398	0.0805299	0.0592471	0.0812539	0.0822162	0.0758118	0.0110647	0.666199	0.0377122	0.019556	0.0318424	0.0269215	0.0208539	0.0265393	0.00550419	0.350068	0.000932659	0.00698448
Q7CQU1	Q7CQU1_SALTY	Pyruvate formate lyase I, induced anaerobically OS=Salmonella typhimurium (strain LT2 / SGSC1412 / ATCC 700720) GN=pflB PE=4 SV=1	0.14416	0.0858346	0.105721	0.111905	0.0296502	0.228811	0.263064	0.23371	0.271579	0.249291	0.0212024	0.448894	0.000796767	0.00391121	0.0752322	0.0598478	0.126883	0.0873209	0.0351145	0.350277	0.000597419	0.00554324
P37411	GYRA_SALTY	DNA gyrase subunit A OS=Salmonella typhimurium (strain LT2 / SGSC1412 / ATCC 700720) GN=gyrA PE=3 SV=3	0.0166498	0.0185464		0.0175981	0.00134112		0.0631098	0.050048	0.0496178	0.0542585	0.00766845	0.324338	0.00784656	0.0113108	0.0219902	0.0121431	0.0245712	0.0195682	0.00655851	0.360647	0.00399199	0.0119734
H9L427	H9L427_SALTY	GTP-binding elongation factor family protein OS=Salmonella typhimurium (strain LT2 / SGSC1412 / ATCC 700720) GN=typA PE=4 SV=1	0.0540375	0.0468244	0.0544214	0.0517611	0.00427961	0.0809134	0.104124	0.101333	0.0854002	0.0929426	0.0115037	0.556915	0.00216423	0.00676533	0.0368288	0.0270938	0.0372358	0.0337195	0.00574161	0.362799	0.000476333	0.00498891
P0A9X6	MREB_SALTY	Rod shape-determining protein MreB OS=Salmonella typhimurium (strain LT2 / SGSC1412 / ATCC 700720) GN=mreB PE=3 SV=1	0.0622706		0.0528239	0.0575472	0.00667979	0.0863926	0.10552	0.103877	0.0849184	0.0951768	0.0110312	0.604635	0.0127115	0.0135307	0.0248776	0.0306632	0.0485786	0.0347065	0.012357	0.364652	0.00102131	0.00731707
P0A2E3	RPOD_SALTY	RNA polymerase sigma factor RpoD OS=Salmonella typhimurium (strain LT2 / SGSC1412 / ATCC 700720) GN=rpoD PE=3 SV=1			0.0525288	0.0525288			0.0880216	0.0985703	0.0854488	0.0906802	0.00695307	0.579275				0.0310932	0.035983	0.0335381	0.00345763	0.36985	0.00189627	0.00986696
Q8ZQW9	Q8ZQW9_SALTY	Phosphoglucomutase OS=Salmonella typhimurium (strain LT2 / SGSC1412 / ATCC 700720) GN=pgm PE=1 SV=1	0.0320951		0.0395742	0.0358346	0.00528855	0.0636174	0.0434013	0.0474472	0.045366	0.049958	0.00925491	0.717296	0.125487	0.0283298	0.0144432		0.0240477	0.0192454	0.00679139	0.385232	0.0151714	0.0181818
P06204	PYRC_SALTY	Dihydroorotase OS=Salmonella typhimurium (strain LT2 / SGSC1412 / ATCC 700720) GN=pyrC PE=1 SV=3	0.119855	0.0992326	0.0820982	0.100395	0.0189052		0.0621281	0.0563947	0.0720169	0.0635132	0.00790267	1.5807	0.0356082	0.0189218	0.0239449	0.0213331	0.0283483	0.0245421	0.00354549	0.386409	0.00146249	0.00842572
Q8ZL96	SYGB_SALTY	Glycine--tRNA ligase beta subunit OS=Salmonella typhimurium (strain LT2 / SGSC1412 / ATCC 700720) GN=glyS PE=3 SV=3	0.0922589	0.0741858	0.0738657	0.0801035	0.0105282	0.117321	0.133503	0.159762	0.138964	0.137388	0.0175204	0.583047	0.00424243	0.00887949	0.0645578	0.0400409	0.0553797	0.0533262	0.0123868	0.388144	0.000902575	0.00676275
Q7CPR9	HLDE_SALTY	Bifunctional protein HldE OS=Salmonella typhimurium (strain LT2 / SGSC1412 / ATCC 700720) GN=hldE PE=3 SV=1	0.0740404		0.0261215	0.0500809	0.0338838	0.0484567	0.0468589	0.0404824	0.0332937	0.0422729	0.00690657	1.1847	0.642163	0.0447146	0.0105503		0.0226711	0.0166107	0.00857071	0.392939	0.0157698	0.0185144
Q7CQU5	Q7CQU5_SALTY	Thioredoxin reductase OS=Salmonella typhimurium (strain LT2 / SGSC1412 / ATCC 700720) GN=trxB PE=3 SV=1	0.186065	0.155934	0.178389	0.173463	0.0156581	0.221247	0.193569	0.204192	0.185001	0.201002	0.015613	0.862988	0.0691815	0.0231501	0.0856708	0.0701678	0.0853575	0.0803987	0.00886162	0.399989	7.54629e-05	0.00177384
Q8ZL52	TDH_SALTY	L-threonine 3-dehydrogenase OS=Salmonella typhimurium (strain LT2 / SGSC1412 / ATCC 700720) GN=tdh PE=3 SV=1	0.0362116	0.0590003	0.0574789	0.0508969	0.0127406		0.0457373	0.0422914	0.0387045	0.0422444	0.00351666	1.20482	0.32019	0.037315		0.0187314	0.0152592	0.0169953	0.00245521	0.40231	0.00326386	0.0111973
P0A1H3	EFG_SALTY	Elongation factor G OS=Salmonella typhimurium (strain LT2 / SGSC1412 / ATCC 700720) GN=fusA PE=3 SV=2	0.546268	0.38765	0.378609	0.437509	0.0942965	0.910919	0.886274	0.893862	0.824447	0.878875	0.0377209	0.497805	0.000331692	0.00274841	0.347954	0.317097	0.40212	0.355723	0.0430406	0.404748	1.23304e-05	0.000776053
P0A6B1	ACP_SALTY	Acyl carrier protein OS=Salmonella typhimurium (strain LT2 / SGSC1412 / ATCC 700720) GN=acpP PE=3 SV=2	0.367048	0.438064	0.327699	0.377604	0.0559345	0.509336	0.323323	0.393837	0.463229	0.422431	0.0813568	0.893882	0.453624	0.0404863	0.212984	0.165075	0.139951	0.17267	0.0371037	0.408753	0.00462124	0.0125277
P66869	SUCC_SALTY	Succinyl-CoA ligase [ADP-forming] subunit beta OS=Salmonella typhimurium (strain LT2 / SGSC1412 / ATCC 700720) GN=sucC PE=3 SV=1	0.107243	0.0582517	0.109319	0.0916046	0.0289031	0.111079	0.127914	0.137891	0.133462	0.127587	0.0117374	0.71798	0.0691166	0.0230444	0.0482793		0.058156	0.0532177	0.0069839	0.41711	0.00133035	0.00809313
P0A1H5	EFTU_SALTY	Elongation factor Tu OS=Salmonella typhimurium (strain LT2 / SGSC1412 / ATCC 700720) GN=tufA PE=3 SV=2	2.89624	2.26952	2.27453	2.4801	0.360401	4.75877	3.67728	3.8167	3.7084	3.99029	0.515795	0.621533	0.00772516	0.0112051	1.856	1.5681	1.68162	1.70191	0.145019	0.426513	0.000750929	0.0059867
P0A1A5	ILVE_SALTY	Branched-chain-amino-acid aminotransferase OS=Salmonella typhimurium (strain LT2 / SGSC1412 / ATCC 700720) GN=ilvE PE=1 SV=2	0.0831739		0.0535813	0.0683776	0.0209251	0.11003	0.122976	0.15793	0.123983	0.12873	0.0204774	0.531171	0.027669	0.0174419	0.0557618	0.0359239	0.0738142	0.0551666	0.0189522	0.428546	0.0046961	0.0127494
Q7CQ36	Q7CQ36_SALTY	3-oxoacyl-[acyl-carrier-protein] synthase I OS=Salmonella typhimurium (strain LT2 / SGSC1412 / ATCC 700720) GN=fabB PE=3 SV=1	0.122246	0.14776	0.118339	0.129448	0.0159787	0.126094	0.146622	0.133666	0.123312	0.132423	0.0104279	0.977532	0.775451	0.0468288	0.0864835	0.0278569		0.0571702	0.0414553	0.431723	0.0184077	0.0189579
Q7CQ01	CLPB_SALTY	Chaperone protein ClpB OS=Salmonella typhimurium (strain LT2 / SGSC1412 / ATCC 700720) GN=clpB PE=3 SV=1	0.17205	0.122011	0.13079	0.141617	0.0267186	0.224212	0.240963	0.257616	0.239303	0.240524	0.0136614	0.588786	0.00129115	0.00549683	0.101748	0.0987311	0.111298	0.103926	0.00656028	0.432081	1.88529e-05	0.000997783
P67563	SYS_SALTY	Serine--tRNA ligase OS=Salmonella typhimurium (strain LT2 / SGSC1412 / ATCC 700720) GN=serS PE=3 SV=1	0.0821147	0.0535846	0.0656551	0.0671181	0.0143212	0.195474	0.117131	0.138649	0.133755	0.146252	0.0340823	0.458921	0.0138229	0.0139535	0.0742782	0.06065	0.0551096	0.0633459	0.00986456	0.433129	0.0103081	0.0160754
P65702	PGK_SALTY	Phosphoglycerate kinase OS=Salmonella typhimurium (strain LT2 / SGSC1412 / ATCC 700720) GN=pgk PE=3 SV=2	0.38192	0.292007	0.413533	0.362487	0.0630505	0.705261	0.506656	0.384988	0.590853	0.54694	0.13521	0.662754	0.0837144	0.02463	0.274497	0.18478	0.277282	0.24552	0.0526207	0.448897	0.015688	0.0184035
P65889	PUR7_SALTY	Phosphoribosylaminoimidazole-succinocarboxamide synthase OS=Salmonella typhimurium (strain LT2 / SGSC1412 / ATCC 700720) GN=purC PE=3 SV=1	0.0927768	0.142329	0.143304	0.126137	0.0288948	0.180199	0.213548	0.180264	0.169355	0.185841	0.0191694	0.678735	0.0210115	0.0158562	0.132889	0.0576183	0.0612399	0.0839158	0.0424508	0.451545	0.00736129	0.0140798
P0A2T6	CRP_SALTY	cAMP-activated global transcriptional regulator CRP OS=Salmonella typhimurium (strain LT2 / SGSC1412 / ATCC 700720) GN=crp PE=1 SV=1	0.0704134	0.0766454	0.0629115	0.0699901	0.00687672	0.077081	0.063524	0.0844905	0.0971123	0.0805519	0.0140447	0.868882	0.290962	0.0361522	0.0268755	0.0534231	0.0294121	0.0365702	0.01465	0.453995	0.010023	0.0158537
P65559	YFCD_SALTY	Uncharacterized Nudix hydrolase YfcD OS=Salmonella typhimurium (strain LT2 / SGSC1412 / ATCC 700720) GN=yfcD PE=3 SV=1	0.053959		0.0582565	0.0561078	0.0030388	0.066373	0.0649273	0.0653129	0.063007	0.064905	0.00140529	0.86446	0.00643575	0.0102537	0.0259983	0.0292805	0.0331808	0.0294865	0.00359566	0.454303	8.73613e-06	0.000554324
Q8ZM69	Q8ZM69_SALTY	D-3-phosphoglycerate dehydrogenase OS=Salmonella typhimurium (strain LT2 / SGSC1412 / ATCC 700720) GN=serA PE=3 SV=1	0.0563213	0.117199	0.0788158	0.0841119	0.0307822	0.218345	0.143969	0.130909	0.155215	0.162109	0.0387837	0.518859	0.0357095	0.0190275	0.0779276	0.0630431	0.0805941	0.0738549	0.00945774	0.455587	0.0129915	0.0172949
Q7CPI1	Q7CPI1_SALTY	PTS family, mannitol-specific enzyme IIABC components OS=Salmonella typhimurium (strain LT2 / SGSC1412 / ATCC 700720) GN=mtlA PE=4 SV=1	0.0609858	0.0465494	0.0581379	0.0552244	0.00764648	0.0776422	0.0950485	0.0880512	0.0809777	0.0854299	0.00774295	0.646429	0.00366638	0.00813953	0.044429	0.0360225	0.038541	0.0396642	0.00431431	0.464289	0.000269071	0.0037694
Q8ZQ05	Q8ZQ05_SALTY	Respiratory NADH dehydrogenase 2 OS=Salmonella typhimurium (strain LT2 / SGSC1412 / ATCC 700720) GN=ndh PE=4 SV=1	0.0496086			0.0496086			0.0417398		0.0328791	0.0373094	0.00626543	1.32965			0.0181865	0.0192301	0.0146361	0.0173509	0.0024083	0.465053	0.0130405	0.0174058
Q7CQ41	ACCD_SALTY	Acetyl-coenzyme A carboxylase carboxyl transferase subunit beta OS=Salmonella typhimurium (strain LT2 / SGSC1412 / ATCC 700720) GN=accD PE=3 SV=1		0.0546463	0.0828446	0.0687455	0.0199392	0.0789058	0.0923867	0.101744	0.100314	0.0933377	0.0104646	0.736524	0.102761	0.0263214	0.045503	0.043079	0.0447867	0.0444562	0.00124532	0.476294	0.000535827	0.00532151
Q7CQT9	Q7CQT9_SALTY	30S ribosomal protein S1 OS=Salmonella typhimurium (strain LT2 / SGSC1412 / ATCC 700720) GN=rpsA PE=3 SV=1	0.147296	0.153825	0.158348	0.153156	0.00555672	0.650887	0.382698	0.533514	0.490776	0.514469	0.110902	0.297698	0.00271	0.00729387	0.205901	0.268979	0.266343	0.247074	0.0356818	0.480251	0.0109406	0.0166297
Q8ZS18	Q8ZS18_SALTY	Threonine synthase OS=Salmonella typhimurium (strain LT2 / SGSC1412 / ATCC 700720) GN=thrC PE=4 SV=1	0.234016	0.211764	0.208788	0.218189	0.013787	0.138253	0.210178	0.179669	0.166536	0.173659	0.0298558	1.25642	0.0648313	0.0226216	0.101671	0.0783747	0.0741835	0.0847432	0.0148093	0.487986	0.00550287	0.013082
Q8ZJU9	Q8ZJU9_SALTY	Putative transport protein OS=Salmonella typhimurium (strain LT2 / SGSC1412 / ATCC 700720) GN=yjjK PE=3 SV=1	0.0879854	0.041867	0.0863222	0.0720582	0.0261596	0.129516	0.151257	0.164432	0.128149	0.143339	0.0176015	0.502713	0.00733672	0.0107822	0.0635996	0.0747149	0.08117	0.0731615	0.00888757	0.51041	0.00155853	0.00920177
Q7CQY7	Q7CQY7_SALTY	Putative phosphate starvation-inducible protein, ATP-binding OS=Salmonella typhimurium (strain LT2 / SGSC1412 / ATCC 700720) GN=phoL PE=4 SV=1	0.0154202	0.0857811	0.0153437	0.0388484	0.040645		0.0493719	0.0517129	0.0529784	0.0513544	0.0018298	0.756476	0.622652	0.044186	0.0320221	0.0264488	0.0210541	0.0265083	0.00548423	0.516184	0.00173977	0.00953437
P0A251	AHPC_SALTY	Alkyl hydroperoxide reductase subunit C OS=Salmonella typhimurium (strain LT2 / SGSC1412 / ATCC 700720) GN=ahpC PE=1 SV=2	0.341866	0.615172	0.582689	0.513242	0.149302	0.321372	0.340554	0.316045	0.310734	0.322176	0.0129986	1.59305	0.0462902	0.0210359	0.205388	0.140015	0.158415	0.167939	0.0337111	0.521264	0.00035753	0.00465632
Q8ZRP4	DAPD_SALTY	2,3,4,5-tetrahydropyridine-2,6-dicarboxylate N-succinyltransferase OS=Salmonella typhimurium (strain LT2 / SGSC1412 / ATCC 700720) GN=dapD PE=3 SV=1	0.197168	0.210229	0.22296	0.210119	0.0128965	0.234067	0.239153	0.245889	0.325112	0.261055	0.0429784	0.804884	0.109266	0.0266385	0.137437	0.0986083	0.173284	0.136443	0.0373476	0.522659	0.0103541	0.0161863
P0A1V6	KPRS_SALTY	Ribose-phosphate pyrophosphokinase OS=Salmonella typhimurium (strain LT2 / SGSC1412 / ATCC 700720) GN=prs PE=3 SV=2	0.154401	0.151962	0.127416	0.144593	0.0149256	0.178096	0.208587	0.202776	0.209438	0.199724	0.0147197	0.723962	0.00456689	0.00909091	0.130323	0.0867998	0.0970501	0.104724	0.0227536	0.524344	0.00106527	0.00764967
P60428	RL2_SALTY	50S ribosomal protein L2 OS=Salmonella typhimurium (strain LT2 / SGSC1412 / ATCC 700720) GN=rplB PE=3 SV=1	0.155909	0.122843	0.149345	0.142699	0.017506	0.436037	0.479269	0.609168	0.591359	0.528958	0.0845197	0.269774	0.000620078	0.00327696	0.291991	0.308159	0.243072	0.281074	0.0338892	0.531372	0.00528312	0.0128603
Q8ZNL5	Q8ZNL5_SALTY	Putative esterase OS=Salmonella typhimurium (strain LT2 / SGSC1412 / ATCC 700720) GN=yeiG PE=4 SV=1	0.0801299	0.0721004	0.051609	0.0679465	0.0147072	0.111549	0.0964218	0.120008	0.111036	0.109754	0.00979386	0.619081	0.00605474	0.00993658	0.0645454	0.0524977		0.0585215	0.00851902	0.533208	0.00337528	0.0114191
P25081	MANA_SALTY	Mannose-6-phosphate isomerase OS=Salmonella typhimurium (strain LT2 / SGSC1412 / ATCC 700720) GN=manA PE=1 SV=2	0.0902191	0.0602377	0.106535	0.0856639	0.0234823	0.0912106	0.0762566	0.0782019	0.0767382	0.0806018	0.0071207	1.0628	0.693053	0.0454545	0.0420758	0.0448612	0.0440657	0.0436676	0.00143472	0.541769	0.000340948	0.00454545
Q8ZRT7	SECA_SALTY	Protein translocase subunit SecA OS=Salmonella typhimurium (strain LT2 / SGSC1412 / ATCC 700720) GN=secA PE=3 SV=1	0.0280187		0.0567075	0.0423631	0.0202861	0.0555603	0.0574181	0.0607527	0.0544181	0.0570373	0.00276834	0.742726	0.179331	0.0311839	0.0326599	0.0266688	0.035212	0.0315136	0.00438543	0.552508	0.000215007	0.00343681
P66955	TALB_SALTY	Transaldolase B OS=Salmonella typhimurium (strain LT2 / SGSC1412 / ATCC 700720) GN=talB PE=3 SV=2	0.277372	0.298194	0.301228	0.292265	0.0129867	0.344927	0.326765	0.294371	0.281638	0.311925	0.0290681	0.936971	0.331886	0.0377378	0.252692	0.124376	0.144215	0.173761	0.0690721	0.557059	0.014281	0.0177384
Q8ZQC4	KCY_SALTY	Cytidylate kinase OS=Salmonella typhimurium (strain LT2 / SGSC1412 / ATCC 700720) GN=cmk PE=3 SV=1	0.0262845			0.0262845			0.0222033	0.0204607	0.0235581	0.022074	0.00155275	1.19074			0.0138485	0.0107263	0.0125835	0.0123861	0.00157043	0.561118	0.00160988	0.0094235
P65977	RECA_SALTY	Protein RecA OS=Salmonella typhimurium (strain LT2 / SGSC1412 / ATCC 700720) GN=recA PE=1 SV=2	0.058418	0.0592295	0.061186	0.0596112	0.00142291	0.098104	0.120374	0.101634	0.0971486	0.104315	0.0108785	0.571452	0.000974979	0.00454545	0.06745	0.0469947	0.0621684	0.058871	0.0106188	0.564357	0.00266816	0.0104213
P63343	FTSH_SALTY	ATP-dependent zinc metalloprotease FtsH OS=Salmonella typhimurium (strain LT2 / SGSC1412 / ATCC 700720) GN=ftsH PE=3 SV=1	0.092984	0.110706	0.11487	0.106187	0.0116219	0.145087	0.163454	0.148266	0.137104	0.148478	0.0110334	0.715168	0.0044275	0.0089852	0.101834	0.0856735	0.0681486	0.0852187	0.0168473	0.573948	0.00176079	0.00964523
Q7CQK9	Q7CQK9_SALTY	Glutaredoxin OS=Salmonella typhimurium (strain LT2 / SGSC1412 / ATCC 700720) GN=ydhD PE=3 SV=1	0.119482	0.138831	0.216519	0.158277	0.0513581	0.0760225	0.0832584	0.0993305	0.0748108	0.0833556	0.0112841	1.89882	0.0331564	0.0184989	0.0400951	0.0504632	0.0537905	0.0481163	0.00714298	0.577241	0.00538821	0.0129712
P66541	RS2_SALTY	30S ribosomal protein S2 OS=Salmonella typhimurium (strain LT2 / SGSC1412 / ATCC 700720) GN=rpsB PE=3 SV=2	0.63147	0.433122	0.505386	0.523326	0.100384	1.16564	0.78653	0.895845	0.895237	0.935813	0.161606	0.559221	0.012028	0.0132135	0.582309	0.514979	0.578574	0.558621	0.0378412	0.596937	0.0117005	0.0170732
Q8ZP10	Q8ZP10_SALTY	Site-determining protein OS=Salmonella typhimurium (strain LT2 / SGSC1412 / ATCC 700720) GN=minD PE=3 SV=1	0.0708845	0.0638661	0.0890283	0.074593	0.0129846	0.127477	0.136556	0.120199	0.119353	0.125896	0.0079874	0.592496	0.00125742	0.00539112	0.0712767	0.0745376	0.081473	0.0757624	0.00520735	0.601785	0.000233927	0.00354767
Q8ZLT3	PNP_SALTY	Polyribonucleotide nucleotidyltransferase OS=Salmonella typhimurium (strain LT2 / SGSC1412 / ATCC 700720) GN=pnp PE=1 SV=1	0.130136	0.125838	0.130111	0.128695	0.00247445	0.235673	0.215907	0.223786	0.16392	0.209822	0.0316614	0.613355	0.00755403	0.0109937	0.149527	0.115824	0.117273	0.127541	0.0190538	0.607857	0.0109329	0.0165188
P25077	MDH_SALTY	Malate dehydrogenase OS=Salmonella typhimurium (strain LT2 / SGSC1412 / ATCC 700720) GN=mdh PE=3 SV=2	0.741936	0.66674	0.776647	0.728441	0.0561823	0.763815	0.570101	0.603226	0.652024	0.647291	0.0846564	1.12537	0.213587	0.0335095	0.369071	0.377375	0.447039	0.397828	0.0428195	0.614604	0.00582021	0.0135255
Q8ZLD4	Q8ZLD4_SALTY	Glutathione oxidoreductase OS=Salmonella typhimurium (strain LT2 / SGSC1412 / ATCC 700720) GN=gor PE=3 SV=1	0.0570564	0.0565101	0.0460125	0.053193	0.00622453		0.0543792		0.0604814	0.0574303	0.0043149	0.926218	0.472256	0.0409091	0.038735	0.0307823	0.0373846	0.0356339	0.00425559	0.620473	0.0113371	0.0168514
Q8ZN53	RODZ_SALTY	Cytoskeleton protein RodZ OS=Salmonella typhimurium (strain LT2 / SGSC1412 / ATCC 700720) GN=rodZ PE=3 SV=1	0.0305865		0.0153031	0.0229448	0.010807	0.0385427	0.0373231		0.0307927	0.0355528	0.00416725	0.645372	0.147222	0.029704	0.0212667	0.0227567	0.026835	0.0236195	0.00288269	0.664348	0.01511	0.018071
Q7CQP6	Q7CQP6_SALTY	Scaffolding protein for murein-synthesizing holoenzyme OS=Salmonella typhimurium (strain LT2 / SGSC1412 / ATCC 700720) GN=mipA PE=4 SV=1	0.156165	0.242028	0.189078	0.195757	0.0433194	0.232214	0.225092	0.217119	0.211128	0.221388	0.00920913	0.884225	0.28913	0.0358351	0.126326	0.157343	0.160079	0.147916	0.0187476	0.668131	0.000946233	0.00709534
P14062	6PGD_SALTY	6-phosphogluconate dehydrogenase, decarboxylating OS=Salmonella typhimurium (strain LT2 / SGSC1412 / ATCC 700720) GN=gnd PE=3 SV=1	0.161476	0.151121	0.165046	0.159214	0.00723248	0.201797	0.212445	0.228879	0.205113	0.212058	0.0120638	0.750805	0.00115952	0.0051797	0.15701	0.12937	0.143148	0.143176	0.0138197	0.675172	0.00088796	0.00654102
P0AA19	OMPR_SALTY	Transcriptional regulatory protein OmpR OS=Salmonella typhimurium (strain LT2 / SGSC1412 / ATCC 700720) GN=ompR PE=3 SV=1	0.164221	0.203751	0.229933	0.199302	0.033081	0.170988	0.175559	0.203123	0.182506	0.183044	0.0141991	1.08882	0.409106	0.0392178	0.124397	0.114514	0.132685	0.123865	0.00909722	0.676696	0.00154526	0.00909091
Q8ZMN0	Q8ZMN0_SALTY	TonB-dependent siderophore receptor protein OS=Salmonella typhimurium (strain LT2 / SGSC1412 / ATCC 700720) GN=iroN PE=3 SV=1	0.0702463	0.137319	0.0459859	0.0845169	0.0473091	0.206907	0.188115	0.209389	0.211664	0.204019	0.0107791	0.41426	0.00397755	0.00845666	0.160039	0.125369	0.146289	0.143899	0.0174579	0.705323	0.00234433	0.0103104
O54297	RS4_SALTY	30S ribosomal protein S4 OS=Salmonella typhimurium (strain LT2 / SGSC1412 / ATCC 700720) GN=rpsD PE=1 SV=3	0.240485	0.27935	0.319823	0.279886	0.0396717	0.659912	0.635445	0.69545	0.61155	0.650589	0.0358365	0.430204	4.85391e-05	0.000951374	0.584594	0.495479	0.463229	0.514434	0.0628633	0.79072	0.0143472	0.0179601
Q8ZP03	Q8ZP03_SALTY	Mannose-specific enzyme IIAB OS=Salmonella typhimurium (strain LT2 / SGSC1412 / ATCC 700720) GN=manX PE=4 SV=1	0.377481	0.422757	0.495019	0.431752	0.0592831	0.584195	0.611692	0.598925	0.546293	0.585276	0.0283136	0.73769	0.00569609	0.00972516	0.445856	0.502921	0.531017	0.493265	0.043394	0.84279	0.0186523	0.0190687
P65534	NDK_SALTY	Nucleoside diphosphate kinase OS=Salmonella typhimurium (strain LT2 / SGSC1412 / ATCC 700720) GN=ndk PE=3 SV=2	0.189612	0.167949	0.175077	0.177546	0.0110403	0.18973	0.164795	0.174311	0.196268	0.181276	0.0143338	0.979426	0.724919	0.0459831	0.231091	0.223971	0.219835	0.224966	0.00569357	1.24101	0.0044713	0.012306
Q9L6Q4	Q9L6Q4_SALTY	89% identity with E. coli putative uroporphyrinogen III methylase (HEMX) (SP:P09127) OS=Salmonella typhimurium (strain LT2 / SGSC1412 / ATCC 700720) GN=hemX PE=4 SV=1	0.0366326	0.0354048	0.0369711	0.0363362	0.000824183	0.0437117	0.0513358	0.0437366	0.0479582	0.0466856	0.00368713	0.778317	0.00549525	0.00961945	0.0648486	0.055683	0.0594677	0.0599998	0.00460592	1.28519	0.00791531	0.014745
Q8ZKA4	Q8ZKA4_SALTY	Component of modulator for protease specific for FtsH phage lambda cII repressor OS=Salmonella typhimurium (strain LT2 / SGSC1412 / ATCC 700720) GN=hflK PE=4 SV=1	0.240523	0.215209	0.27805	0.244594	0.0316177	0.2307	0.239655	0.245039	0.206461	0.230464	0.0170597	1.06131	0.475064	0.0410148	0.333639	0.289045	0.267958	0.296881	0.0335342	1.28819	0.0176593	0.0187361
Q8ZPL1	Q8ZPL1_SALTY	Putative periplasmic protein OS=Salmonella typhimurium (strain LT2 / SGSC1412 / ATCC 700720) GN=ydgH PE=1 SV=1	0.08575	0.0952224	0.109096	0.0966894	0.0117418	0.0785362	0.0712447	0.0737692	0.0664354	0.0724964	0.00504651	1.33371	0.012963	0.0136364	0.100089	0.0828568	0.0988673	0.0939375	0.00961563	1.29575	0.0116047	0.0169623
P02936	OMPA_SALTY	Outer membrane protein A OS=Salmonella typhimurium (strain LT2 / SGSC1412 / ATCC 700720) GN=ompA PE=3 SV=2	3.0551	3.22128	3.98766	3.42135	0.497429	4.95125	4.07811	4.75433	4.31823	4.52548	0.398639	0.756019	0.0219677	0.0162791	5.56229	5.70178	6.36742	5.87716	0.430266	1.29868	0.00771602	0.0144124
P0A2A3	RL1_SALTY	50S ribosomal protein L1 OS=Salmonella typhimurium (strain LT2 / SGSC1412 / ATCC 700720) GN=rplA PE=3 SV=1	0.52409	0.512548	0.576116	0.537585	0.0338646	0.819822	0.941305	0.932155	0.885868	0.894787	0.0555565	0.600796	0.000194945	0.00221987	1.2471	1.1404	1.16547	1.18432	0.055791	1.32358	0.00103881	0.00742794
P69936	YDFG_SALTY	NADP-dependent L-serine/L-allo-threonine dehydrogenase YdfG OS=Salmonella typhimurium (strain LT2 / SGSC1412 / ATCC 700720) GN=ydfG PE=3 SV=1	0.0907888	0.103289	0.130453	0.108177	0.0202789		0.0582468	0.0599203	0.0604755	0.0595475	0.00116016	1.81665	0.0142982	0.0141649	0.0850206	0.0721545	0.0846042	0.0805931	0.00731099	1.35342	0.00790502	0.0146341
Q8ZRU0	Q8ZRU0_SALTY	Cell division protein FtsZ OS=Salmonella typhimurium (strain LT2 / SGSC1412 / ATCC 700720) GN=ftsZ PE=3 SV=1	0.122962	0.136952	0.160033	0.139983	0.0187204	0.129639	0.126983	0.128609	0.117145	0.125594	0.00573782	1.11456	0.196493	0.0323467	0.182405	0.154831	0.174528	0.170588	0.014203	1.35825	0.00202339	0.00997783
Q8ZQS2	GPMA_SALTY	2,3-bisphosphoglycerate-dependent phosphoglycerate mutase OS=Salmonella typhimurium (strain LT2 / SGSC1412 / ATCC 700720) GN=gpmA PE=3 SV=3	0.830471	1.11839	1.00155	0.983469	0.144807	0.487948	0.57738	0.632559	0.622281	0.580042	0.0659054	1.69551	0.00397455	0.00835095	0.846338	0.759453	0.764874	0.790222	0.0486735	1.36235	0.00575491	0.0134146
H9L495	H9L495_SALTY	Secretion system apparatus protein OS=Salmonella typhimurium (strain LT2 / SGSC1412 / ATCC 700720) GN=ssaC PE=3 SV=1	0.0268726	0.0248941	0.0318711	0.0278793	0.0035958		0.0379608	0.0362055	0.0346971	0.0362878	0.00163343	0.768282	0.0210623	0.0159619	0.0547351	0.0454857	0.049988	0.0500696	0.00462525	1.37979	0.00824097	0.0150776
P0A263	OMPC_SALTY	Outer membrane protein C OS=Salmonella typhimurium (strain LT2 / SGSC1412 / ATCC 700720) GN=ompC PE=3 SV=1	1.01207	2.29083	1.38165	1.56152	0.658081	1.56248	1.42013	1.57055	1.55216	1.52633	0.0711988	1.02305	0.916886	0.0486258	2.21067	2.04057	2.07245	2.1079	0.0904213	1.38103	0.000209476	0.00321508
P0A7V6	RS3_SALTY	30S ribosomal protein S3 OS=Salmonella typhimurium (strain LT2 / SGSC1412 / ATCC 700720) GN=rpsC PE=3 SV=2	0.591122	0.560006	0.657933	0.60302	0.050036	1.12246	1.17878	1.1395	1.00904	1.11245	0.0728588	0.542068	0.00014774	0.00179704	1.67984	1.45999	1.47314	1.53766	0.123312	1.38223	0.00217522	0.0100887
P0A283	PTGA_SALTY	Glucose-specific phosphotransferase enzyme IIA component OS=Salmonella typhimurium (strain LT2 / SGSC1412 / ATCC 700720) GN=crr PE=3 SV=2	1.09038	1.23037	1.19255	1.1711	0.0724179	0.479119	0.579912	0.660198	0.607775	0.581751	0.0760873	2.01306	0.000145729	0.00169133	0.816604	0.737096	0.8841	0.8126	0.0735836	1.39682	0.0100719	0.0159645
P63601	AROK_SALTY	Shikimate kinase 1 OS=Salmonella typhimurium (strain LT2 / SGSC1412 / ATCC 700720) GN=aroK PE=3 SV=2	0.0460702	0.0597183	0.0614499	0.0557461	0.00842424		0.0345264	0.0285874	0.0330867	0.0320668	0.00309802	1.73844	0.0102658	0.0123679	0.0486257	0.040935	0.0453899	0.0449835	0.00386141	1.40281	0.0106653	0.016408
Q7CPK0	UGPB_SALTY	sn-glycerol-3-phosphate-binding periplasmic protein UgpB OS=Salmonella typhimurium (strain LT2 / SGSC1412 / ATCC 700720) GN=ugpB PE=3 SV=1	0.742298	0.875212	0.90459	0.8407	0.0864752	0.608056	0.611976	0.664036	0.562104	0.611543	0.0416817	1.37472	0.00522303	0.00940803	0.928222	0.830276	0.821856	0.860118	0.0591297	1.40647	0.00121071	0.00798226
Q8ZLL6	Q8ZLL6_SALTY	Peptidyl-prolyl cis-trans isomerase OS=Salmonella typhimurium (strain LT2 / SGSC1412 / ATCC 700720) GN=fkpA PE=4 SV=1	0.531528	0.65199	0.346794	0.510104	0.153722	0.28126	0.271604	0.345321	0.305062	0.300811	0.0328355	1.69576	0.0414373	0.0199789	0.414937	0.450813	0.438388	0.434713	0.0182178	1.44513	0.00150519	0.00864745
P0A2H3	TATA_SALTY	Sec-independent protein translocase protein TatA OS=Salmonella typhimurium (strain LT2 / SGSC1412 / ATCC 700720) GN=tatA PE=3 SV=1							0.190069	0.169721		0.179895	0.0143885				0.259053	0.275219	0.247129	0.260467	0.0140983	1.44788	0.00838656	0.0154102
Q8ZN72	Q8ZN72_SALTY	Outer membrane protein assembly factor BamC OS=Salmonella typhimurium (strain LT2 / SGSC1412 / ATCC 700720) GN=nlpB PE=3 SV=1	0.138251	0.140794	0.153465	0.14417	0.0081499	0.222816	0.145854	0.148862	0.156788	0.16858	0.0364503	0.855203	0.316118	0.0372093	0.243583	0.244659	0.261109	0.249784	0.00982316	1.48169	0.0143283	0.0178492
P02910	HISJ_SALTY	Histidine-binding periplasmic protein OS=Salmonella typhimurium (strain LT2 / SGSC1412 / ATCC 700720) GN=hisJ PE=1 SV=1	0.11715	0.176795	0.134714	0.142886	0.0306505	0.0633893	0.0893523	0.0887738	0.0668196	0.0770838	0.0139052	1.85365	0.011583	0.0128964	0.119742	0.109048	0.117463	0.115418	0.00563287	1.4973	0.00686554	0.0138581
P0A2C5	RBSB_SALTY	D-ribose-binding periplasmic protein OS=Salmonella typhimurium (strain LT2 / SGSC1412 / ATCC 700720) GN=rbsB PE=1 SV=1	0.136446	0.106596	0.0916564	0.111566	0.0228048	0.0956407	0.0794213	0.0791618	0.0871446	0.0853421	0.00780086	1.30728	0.0795236	0.0242072	0.107391	0.132835	0.144507	0.128245	0.0189791	1.50271	0.00865513	0.0156319
Q8ZRQ2	Q8ZRQ2_SALTY	Outer membrane protein receptor / transporter for ferrichrome, colicin M, and phages T1, T5, and phi80 OS=Salmonella typhimurium (strain LT2 / SGSC1412 / ATCC 700720) GN=fhuA PE=3 SV=1	0.0610259	0.0848263	0.0999826	0.0819449	0.0196375	0.112923	0.0998748	0.103009	0.0964656	0.103068	0.00709247	0.795056	0.0973039	0.0260042	0.177823	0.150782	0.148452	0.159019	0.0163262	1.54285	0.00152203	0.00898004
P67904	RS10_SALTY	30S ribosomal protein S10 OS=Salmonella typhimurium (strain LT2 / SGSC1412 / ATCC 700720) GN=rpsJ PE=3 SV=1	0.321178	0.303541	0.239528	0.288083	0.0429639	0.345059	0.308908	0.281898	0.355643	0.322877	0.0338629	0.892236	0.281681	0.0356237	0.530813	0.480697	0.497152	0.502887	0.0255453	1.55752	0.000607347	0.0056541
P0DM78	PHOP_SALTY	Virulence transcriptional regulatory protein PhoP OS=Salmonella typhimurium (strain LT2 / SGSC1412 / ATCC 700720) GN=phoP PE=1 SV=1	1.11209	1.14232	1.16858	1.14099	0.0282688	0.716489	0.895581	0.84982	0.779795	0.810421	0.0786674	1.4079	0.0010363	0.00475687	1.3287	1.298	1.18856	1.27175	0.0736607	1.56925	0.000530717	0.00521064
Q8ZNA5	FADL_SALTY	Long-chain fatty acid transport protein OS=Salmonella typhimurium (strain LT2 / SGSC1412 / ATCC 700720) GN=fadL PE=3 SV=2	0.0918179	0.0774245	0.0826057	0.0839494	0.00729015	0.0549535	0.0668842	0.0644633	0.0576757	0.0609942	0.00560444	1.37635	0.00512275	0.00919662	0.104948	0.0878311	0.0963389	0.0963728	0.00855873	1.58003	0.00113941	0.00776053
Q8ZRB8	Q8ZRB8_SALTY	Peptidylprolyl isomerase OS=Salmonella typhimurium (strain LT2 / SGSC1412 / ATCC 700720) GN=cypD PE=4 SV=1	0.0788218	0.0806327	0.104664	0.0880395	0.0144257	0.10873	0.0873372	0.0858951	0.096417	0.0945948	0.0105115	0.930701	0.514074	0.0419662	0.169288	0.131224	0.147929	0.14948	0.0190794	1.58022	0.00433469	0.0121951
Q8ZPL8	Q8ZPL8_SALTY	Putative periplasmic protein OS=Salmonella typhimurium (strain LT2 / SGSC1412 / ATCC 700720) GN=ydgA PE=4 SV=1	0.0728041	0.0560442	0.0690546	0.0659676	0.00879607	0.0632295	0.063012	0.0565851	0.0543268	0.0592884	0.00452118	1.11266	0.240853	0.0344609	0.106583	0.0833077	0.0919808	0.0939571	0.0117628	1.58475	0.00267118	0.0105322
Q8ZQT5	TOLB_SALTY	Protein TolB OS=Salmonella typhimurium (strain LT2 / SGSC1412 / ATCC 700720) GN=tolB PE=3 SV=1	0.166827	0.177421	0.201141	0.181796	0.0175703	0.11264	0.125577	0.148786	0.149102	0.134026	0.0180178	1.35642	0.0171759	0.0147992	0.176304	0.232256	0.228994	0.212518	0.0314044	1.58564	0.00822027	0.0149667
P0A2F6	SSB1_SALTY	Single-stranded DNA-binding protein 1 OS=Salmonella typhimurium (strain LT2 / SGSC1412 / ATCC 700720) GN=ssb PE=3 SV=2	0.133272	0.122721	0.118396	0.124797	0.00765192	0.105436	0.0878681	0.096195	0.11798	0.10187	0.0129167	1.22506	0.0427398	0.0205074	0.136641	0.163891	0.184235	0.161589	0.0238802	1.58623	0.00759949	0.0141907
P0AA13	RL13_SALTY	50S ribosomal protein L13 OS=Salmonella typhimurium (strain LT2 / SGSC1412 / ATCC 700720) GN=rplM PE=3 SV=1	0.189152	0.252493	0.281829	0.241158	0.0473667	0.282282	0.336635	0.344864	0.316591	0.320093	0.027864	0.7534	0.0380343	0.0197674	0.487226	0.523677	0.513588	0.508164	0.0188211	1.58755	0.000171749	0.00277162
P66932	TIG_SALTY	Trigger factor OS=Salmonella typhimurium (strain LT2 / SGSC1412 / ATCC 700720) GN=tig PE=3 SV=1	0.327411	0.403118	0.392806	0.374445	0.0410576	0.358359	0.374024	0.395681	0.347121	0.368796	0.0210464	1.01532	0.818954	0.0472516	0.706073	0.494271	0.597321	0.599221	0.105914	1.6248	0.00718036	0.013969
P0A2A1	RL19_SALTY	50S ribosomal protein L19 OS=Salmonella typhimurium (strain LT2 / SGSC1412 / ATCC 700720) GN=rplS PE=3 SV=2	0.271825	0.252982	0.267386	0.264064	0.00985109	0.531883	0.449713	0.590649	0.571376	0.535905	0.0624507	0.492745	0.00075651	0.00359408	0.889578	0.852241	0.88252	0.87478	0.0198353	1.63234	0.00030154	0.004102
P58480	HTPG_SALTY	Chaperone protein HtpG OS=Salmonella typhimurium (strain LT2 / SGSC1412 / ATCC 700720) GN=htpG PE=3 SV=1	0.245238	0.2569	0.28226	0.261466	0.0189286	0.283486	0.268444	0.267315	0.377579	0.299206	0.0527659	0.873867	0.298344	0.0365751	0.56399	0.451929	0.451372	0.489097	0.0648597	1.63465	0.00776315	0.0145233
Q7CQR3	Q7CQR3_SALTY	Glutaredoxin 2 OS=Salmonella typhimurium (strain LT2 / SGSC1412 / ATCC 700720) GN=grxB PE=1 SV=1	0.133878	0.118314	0.165097	0.139097	0.0238243	0.0706298	0.0841168		0.0890116	0.0812528	0.00951973	1.7119	0.0174662	0.0150106	0.131799	0.11931	0.147634	0.132914	0.014195	1.63581	0.0063606	0.0137472
P60626	RL24_SALTY	50S ribosomal protein L24 OS=Salmonella typhimurium (strain LT2 / SGSC1412 / ATCC 700720) GN=rplX PE=3 SV=2	0.126362	0.0895775	0.156301	0.12408	0.0334203	0.117197	0.179994	0.186743	0.198799	0.170683	0.0364959	0.726961	0.144441	0.0294926	0.300757	0.294507	0.265895	0.287053	0.0185878	1.68179	0.00418824	0.0120843
Q8ZQR7	Q8ZQR7_SALTY	Molybdate transporter OS=Salmonella typhimurium (strain LT2 / SGSC1412 / ATCC 700720) GN=modA PE=4 SV=1	0.212231	0.262912	0.211235	0.228792	0.0295524	0.230244	0.199745	0.197974	0.212445	0.210102	0.0148946	1.08896	0.315886	0.0371036	0.32433	0.356765	0.404445	0.361847	0.0402986	1.72225	0.000857846	0.00643016
Q8ZLZ4	Q8ZLZ4_SALTY	Outer membrane channel OS=Salmonella typhimurium (strain LT2 / SGSC1412 / ATCC 700720) GN=tolC PE=4 SV=1	0.170072	0.185678	0.229783	0.195178	0.0309682	0.259543	0.134136	0.164606	0.144375	0.175665	0.0573339	1.11108	0.621148	0.0440803	0.290947	0.306637	0.319884	0.305823	0.0144854	1.74094	0.0131826	0.0175166
Q8ZPT3	Q8ZPT3_SALTY	Putative outer membrane protein OS=Salmonella typhimurium (strain LT2 / SGSC1412 / ATCC 700720) GN=STM1328 PE=1 SV=1	0.0815717	0.0912427	0.0771262	0.0833135	0.00721762		0.060299		0.0477629	0.054031	0.00886435	1.54196	0.0260869	0.0173362	0.103353	0.094529	0.0844814	0.094121	0.00944218	1.74198	0.0177469	0.018847
P40676	SLYA_SALTY	Transcriptional regulator SlyA OS=Salmonella typhimurium (strain LT2 / SGSC1412 / ATCC 700720) GN=slyA PE=1 SV=3	0.105714	0.100447	0.0935599	0.0999072	0.00609523		0.0609132	0.0736764		0.0672948	0.00902494	1.48462	0.0157514	0.014482	0.125696	0.117224	0.109117	0.117345	0.00829018	1.74375	0.00766418	0.0143016
Q8ZLQ1	Q8ZLQ1_SALTY	Serine endoprotease OS=Salmonella typhimurium (strain LT2 / SGSC1412 / ATCC 700720) GN=degQ PE=4 SV=1	0.0744814	0.118474	0.13429	0.109082	0.0309906	0.0605242	0.0447366	0.0656307	0.0633426	0.0585585	0.00944834	1.86278	0.0250455	0.017019	0.108461	0.0997178	0.100322	0.102833	0.00488273	1.75608	0.000756375	0.00609756
Q7CR87	SURA_SALTY	Chaperone SurA OS=Salmonella typhimurium (strain LT2 / SGSC1412 / ATCC 700720) GN=surA PE=3 SV=1	0.113005	0.131345	0.115668	0.120006	0.00990968	0.0851698	0.0943461	0.103021	0.079538	0.0905188	0.0103303	1.32576	0.0126483	0.0134249	0.176937	0.148368	0.159586	0.161631	0.0143938	1.7856	0.000595884	0.00543237
Q7CPZ4	GRPE_SALTY	Protein GrpE OS=Salmonella typhimurium (strain LT2 / SGSC1412 / ATCC 700720) GN=grpE PE=3 SV=1	0.28433	0.42459	0.388312	0.365744	0.0728025	0.224057	0.267727	0.284366	0.26862	0.261192	0.0259096	1.40029	0.0415087	0.0200846	0.468073	0.469985	0.468746	0.468934	0.000969801	1.79536	3.92772e-05	0.00166297
P0A1E3	CYSK_SALTY	Cysteine synthase A OS=Salmonella typhimurium (strain LT2 / SGSC1412 / ATCC 700720) GN=cysK PE=1 SV=2	0.306184	0.304649	0.344316	0.318383	0.0224717	0.106376	0.134326	0.127557	0.128863	0.12428	0.0122914	2.56181	2.49985e-05	0.000317125	0.245444	0.215669	0.208934	0.223349	0.0194292	1.79714	0.000404349	0.00487805
H9L419	H9L419_SALTY	Putative periplasmic binding transport protein OS=Salmonella typhimurium (strain LT2 / SGSC1412 / ATCC 700720) GN=fliY PE=3 SV=1	0.0344089	0.0370089	0.0667373	0.0460517	0.0179613		0.0278063	0.0260271	0.0374542	0.0304292	0.00614854	1.5134	0.227199	0.0338266	0.0609132	0.0528254	0.0550647	0.0562677	0.00417595	1.84914	0.00383246	0.0118625
Q7CQ15	Q7CQ15_SALTY	Putative inner membrane protein OS=Salmonella typhimurium (strain LT2 / SGSC1412 / ATCC 700720) GN=yfgM PE=4 SV=1		0.0555171	0.0501693	0.0528432	0.00378148		0.0343308	0.0291309	0.0503066	0.0379228	0.0110354	1.39344	0.176111	0.0310782	0.0634542	0.0683074	0.0802086	0.0706567	0.0086207	1.86317	0.0154913	0.0182927
Q8ZLU4	Q8ZLU4_SALTY	Penicillin-binding protein activator LpoA OS=Salmonella typhimurium (strain LT2 / SGSC1412 / ATCC 700720) GN=yraM PE=3 SV=1	0.0236866	0.0240157	0.0425864	0.0300962	0.0108181		0.024465	0.0169815	0.0192332	0.0202266	0.00383939	1.48795	0.210673	0.0332981	0.042833	0.0343498	0.0376176	0.0382668	0.0042787	1.89191	0.00556006	0.0131929
Q8ZRD3	NUSB_SALTY	N utilization substance protein B homolog OS=Salmonella typhimurium (strain LT2 / SGSC1412 / ATCC 700720) GN=nusB PE=3 SV=1	0.0917978	0.109086	0.125757	0.108881	0.0169807	0.0554417	0.0669865	0.0589897		0.0604726	0.00591352	1.80049	0.00956821	0.0120507	0.105509	0.122553	0.119481	0.115847	0.0090843	1.9157	0.000900721	0.00665188
Q8ZR16	Q8ZR16_SALTY	RNase I OS=Salmonella typhimurium (strain LT2 / SGSC1412 / ATCC 700720) GN=rna PE=3 SV=1	0.104979	0.133484	0.182195	0.140219	0.0390458		0.0707188	0.0945624	0.0548695	0.0733836	0.0199802	1.91077	0.0576215	0.0221987	0.151012	0.118682	0.165466	0.145053	0.0239547	1.97664	0.0164076	0.0186253
P60726	RL4_SALTY	50S ribosomal protein L4 OS=Salmonella typhimurium (strain LT2 / SGSC1412 / ATCC 700720) GN=rplD PE=1 SV=1	0.358439	0.371823	0.413413	0.381225	0.0286676	0.600177	0.419352	0.427597	0.367879	0.453751	0.10113	0.840162	0.290712	0.0359408	1.12074	0.782298	0.823131	0.908723	0.184744	2.00269	0.00821143	0.0148559
P0AA02	NUSG_SALTY	Transcription termination/antitermination protein NusG OS=Salmonella typhimurium (strain LT2 / SGSC1412 / ATCC 700720) GN=nusG PE=3 SV=2	0.109016	0.120857	0.135383	0.121752	0.0132063	0.0501563	0.107409	0.0881669	0.0827039	0.0821091	0.0237916	1.48281	0.050321	0.0215645	0.185327	0.153332	0.160463	0.166374	0.0167969	2.02625	0.00350575	0.0115299
Q8ZRA6	Q8ZRA6_SALTY	Acridine efflux pump OS=Salmonella typhimurium (strain LT2 / SGSC1412 / ATCC 700720) GN=acrA PE=4 SV=1	0.0743929	0.070863	0.0804242	0.0752267	0.00483484	0.0852658	0.0826372	0.0943109	0.0813133	0.0858818	0.00585457	0.875933	0.0512262	0.0216702	0.215869	0.161617	0.151196	0.176227	0.0347241	2.05198	0.0032584	0.0110865
H9L451	BAMB_SALTY	Outer membrane protein assembly factor BamB OS=Salmonella typhimurium (strain LT2 / SGSC1412 / ATCC 700720) GN=bamB PE=3 SV=1	0.0864267	0.0848416	0.0803399	0.0838694	0.0031577	0.0583251	0.0799704	0.0651801	0.0668564	0.067583	0.00904541	1.24098	0.0327522	0.0181818	0.159979	0.12652	0.131423	0.139307	0.018069	2.06128	0.000913334	0.00687361
Q7CQZ5	Q7CQZ5_SALTY	RNA chaperone, negative regulator of cspA transcription OS=Salmonella typhimurium (strain LT2 / SGSC1412 / ATCC 700720) GN=cspE PE=1 SV=1	0.34566	0.402323	0.308229	0.352071	0.0473738	0.281269	0.231152	0.259009	0.299791	0.267805	0.0295817	1.31465	0.0328228	0.0182875	0.508848	0.576401	0.572061	0.552437	0.0378112	2.06283	9.68399e-05	0.00210643
Q8ZRP0	BAMA_SALTY	Outer membrane protein assembly factor BamA OS=Salmonella typhimurium (strain LT2 / SGSC1412 / ATCC 700720) GN=bamA PE=3 SV=1	0.0870933	0.10736	0.110055	0.101503	0.0125514	0.106859	0.114231	0.101027	0.0886573	0.102694	0.0108054	0.9884	0.897721	0.0483087	0.271725	0.205328	0.164925	0.213993	0.0539245	2.08379	0.00891267	0.0157428
P0A9Y9	CSPC_SALTY	Cold shock-like protein CspC OS=Salmonella typhimurium (strain LT2 / SGSC1412 / ATCC 700720) GN=cspC PE=3 SV=2	0.689113	0.91565	0.669831	0.758198	0.136698	0.5757	0.587367	0.926762	0.958025	0.761963	0.208788	0.995058	0.979592	0.0498943	1.87432	1.54268	1.58701	1.668	0.180048	2.18909	0.00184947	0.0097561
P0A7L6	RL20_SALTY	50S ribosomal protein L20 OS=Salmonella typhimurium (strain LT2 / SGSC1412 / ATCC 700720) GN=rplT PE=3 SV=2	0.151392	0.183448	0.216325	0.183722	0.0324676	0.132472	0.232717	0.215874	0.193443	0.193627	0.0438287	0.948846	0.757016	0.0466173	0.381923	0.495302	0.416192	0.431139	0.0581483	2.22665	0.00157815	0.00931264
Q7CP96	Q7CP96_SALTY	Protein HflC OS=Salmonella typhimurium (strain LT2 / SGSC1412 / ATCC 700720) GN=hflC PE=3 SV=1	0.200666	0.226499	0.229736	0.218967	0.0159312	0.216379	0.18341	0.187402	0.172655	0.189961	0.0186803	1.15269	0.0838335	0.0247357	0.494028	0.402538	0.38063	0.425732	0.060152	2.24115	0.000632511	0.00576497
Q8ZRN1	METQ_SALTY	D-methionine-binding lipoprotein MetQ OS=Salmonella typhimurium (strain LT2 / SGSC1412 / ATCC 700720) GN=metQ PE=3 SV=1	0.171884	0.118436	0.122128	0.137483	0.0298497	0.18775	0.12602	0.142585	0.0920249	0.137095	0.0397913	1.00283	0.989326	0.05	0.260559	0.29633	0.367158	0.308016	0.0542517	2.24674	0.00466561	0.0126386
O33789	WZZE_SALTY	ECA polysaccharide chain length modulation protein OS=Salmonella typhimurium (strain LT2 / SGSC1412 / ATCC 700720) GN=wzzE PE=3 SV=2	0.0282542	0.0383991	0.041751	0.0361348	0.00702752		0.0322551	0.0256165	0.0216489	0.0265068	0.00535889	1.36322	0.132217	0.0286469	0.071386	0.0507432	0.0570519	0.059727	0.0105782	2.25327	0.00832573	0.0151885
Q7CP68	Q7CP68_SALTY	Hyperosmotically inducible periplasmic protein OS=Salmonella typhimurium (strain LT2 / SGSC1412 / ATCC 700720) GN=osmY PE=4 SV=1	0.225726	0.275951	0.239902	0.247193	0.025894	0.0450122	0.0647202	0.0540594	0.0372525	0.0502611	0.0118359	4.91818	3.66697e-05	0.000634249	0.13689	0.107085	0.0992426	0.114406	0.0198625	2.27623	0.00294155	0.010643
Q7CPE5	ATPD_SALTY	ATP synthase subunit delta OS=Salmonella typhimurium (strain LT2 / SGSC1412 / ATCC 700720) GN=atpH PE=3 SV=1		0.0637057		0.0637057		0.018286			0.0236984	0.0209922	0.0038272	3.03473			0.0460119	0.0490924	0.0490368	0.048047	0.00176269	2.2888	0.0015103	0.00886918
Q8ZPA3	Q8ZPA3_SALTY	Putative periplasmic binding protein OS=Salmonella typhimurium (strain LT2 / SGSC1412 / ATCC 700720) GN=STM1633 PE=1 SV=1	0.640241	0.655137	0.716824	0.670734	0.040604	0.247973	0.238762	0.254287	0.271579	0.25315	0.0138411	2.64955	6.30719e-06	0.000105708	0.665751	0.513368	0.580745	0.586621	0.0763615	2.31729	0.000310172	0.00421286
P67557	OPGG_SALTY	Glucans biosynthesis protein G OS=Salmonella typhimurium (strain LT2 / SGSC1412 / ATCC 700720) GN=mdoG PE=3 SV=1	0.0454437	0.0309438	0.0572197	0.0445357	0.0131614		0.0469055	0.0309051	0.034886	0.0375655	0.00832996	1.18555	0.48156	0.0411205	0.100678	0.0775043	0.0866345	0.0882724	0.0116736	2.34982	0.00360114	0.0116408
H9L442	H9L442_SALTY	D-alanyl-D-alanine dipeptidase OS=Salmonella typhimurium (strain LT2 / SGSC1412 / ATCC 700720) GN=pdgL PE=3 SV=1	0.582645	0.665205	0.675444	0.641098	0.0508801	0.18832	0.274712	0.268332	0.170934	0.225575	0.0535916	2.84207	0.000144371	0.00158562	0.651479	0.471169	0.479903	0.534184	0.101674	2.3681	0.00324721	0.0109756
P43669	PRC_SALTY	Tail-specific protease OS=Salmonella typhimurium (strain LT2 / SGSC1412 / ATCC 700720) GN=prc PE=3 SV=2	0.0184541	0.0246344	0.0380704	0.027053	0.0100293		0.0127281	0.0184609	0.0139201	0.0150364	0.00302498	1.79917	0.117875	0.0278013	0.039017	0.0363847	0.0381481	0.0378499	0.00134121	2.51722	0.000281757	0.00388027
Q7CR88	Q7CR88_SALTY	Putative secreted protein OS=Salmonella typhimurium (strain LT2 / SGSC1412 / ATCC 700720) GN=STM0082 PE=1 SV=1	0.392671	0.66179	0.603849	0.55277	0.141644	0.259041	0.19766	0.275641	0.339667	0.268002	0.0583739	2.06256	0.0137755	0.0138478	0.827676	0.686568	0.513943	0.676062	0.15713	2.5226	0.00449983	0.0124169
Q8ZRJ9	PAGN_SALTY	Outer membrane protein PagN OS=Salmonella typhimurium (strain LT2 / SGSC1412 / ATCC 700720) GN=pagN PE=1 SV=1	1.29171	1.56623	1.61446	1.4908	0.174092	0.975804	1.09462	1.14351	1.07877	1.07318	0.0705196	1.38915	0.00671032	0.0104651	2.59759	2.72214	2.81226	2.71066	0.107797	2.52583	2.09456e-06	0.000221729
P0A1Z2	SKP_SALTY	Chaperone protein Skp OS=Salmonella typhimurium (strain LT2 / SGSC1412 / ATCC 700720) GN=skp PE=1 SV=1	0.224285	0.206906	0.260954	0.230715	0.027592	0.150503	0.146626	0.17205	0.258885	0.182016	0.0524519	1.26755	0.208883	0.0330867	0.555053	0.33875	0.510243	0.468015	0.114167	2.57129	0.00628477	0.0136364
Q7CQV9	DPS_SALTY	DNA protection during starvation protein OS=Salmonella typhimurium (strain LT2 / SGSC1412 / ATCC 700720) GN=dps PE=3 SV=3	0.151755	0.147852	0.164787	0.154798	0.00886795		0.0609413	0.0639258	0.0570471	0.0606381	0.00344934	2.55281	6.79709e-05	0.00116279	0.14726	0.153264	0.167942	0.156155	0.0106398	2.5752	0.000121623	0.00243902
Q8ZLD5	Q8ZLD5_SALTY	Putative phosphatase OS=Salmonella typhimurium (strain LT2 / SGSC1412 / ATCC 700720) GN=STM3595 PE=4 SV=1	0.522062	0.65131	0.723412	0.632261	0.102018	0.296699	0.223721	0.259275	0.220387	0.25002	0.0357506	2.52884	0.00084338	0.00401691	0.735879	0.591688	0.630127	0.652564	0.0746682	2.61004	0.000205026	0.00310421
Q7CQV2	Q7CQV2_SALTY	Arginine 3rd transport system OS=Salmonella typhimurium (strain LT2 / SGSC1412 / ATCC 700720) GN=artJ PE=3 SV=1	0.0523318	0.0766072	0.0717249	0.0668879	0.0128402		0.0430569		0.0334341	0.0382455	0.00680436	1.74891	0.0677126	0.0229387	0.1114	0.0947267	0.109223	0.105116	0.00906347	2.74847	0.00315052	0.0107539
P26982	DEGP_SALTY	Periplasmic serine endoprotease DegP OS=Salmonella typhimurium (strain LT2 / SGSC1412 / ATCC 700720) GN=degP PE=3 SV=1	0.197982	0.241509	0.321128	0.25354	0.0624487	0.105016	0.0777598	0.0967209	0.083912	0.0908522	0.0123104	2.79068	0.00334686	0.00803383	0.279332	0.255265	0.25775	0.264116	0.0132359	2.90709	1.00507e-05	0.000665188
P0A2C7	POTD_SALTY	Spermidine/putrescine-binding periplasmic protein OS=Salmonella typhimurium (strain LT2 / SGSC1412 / ATCC 700720) GN=potD PE=3 SV=1	0.201539	0.36895	0.250742	0.273744	0.0860436	0.115998	0.113357	0.106639	0.134188	0.117545	0.0117737	2.32883	0.0139065	0.0140592	0.352258	0.320428	0.452676	0.375121	0.0690244	3.19128	0.00064122	0.00587583
P26976	PHON_SALTY	Non-specific acid phosphatase OS=Salmonella typhimurium (strain LT2 / SGSC1412 / ATCC 700720) GN=phoN PE=3 SV=1	1.90886	2.69351	2.7584	2.45359	0.472865	0.860089	0.583323	0.844947	0.865677	0.788509	0.137071	3.11169	0.000999456	0.00465116	3.73947	3.02393	2.80056	3.18799	0.490488	4.04306	0.000209742	0.00332594
Q8ZRB1	Q8ZRB1_SALTY	Glycoprotein/polysaccharide metabolism OS=Salmonella typhimurium (strain LT2 / SGSC1412 / ATCC 700720) GN=ybaY PE=4 SV=1	0.0961299	0.0834361	0.0759863	0.0851841	0.0101849		0.0187779		0.0183	0.0185389	0.000337937	4.59488	0.00311568	0.00761099	0.102728	0.0746021	0.076394	0.0845746	0.0157466	4.562	0.0111074	0.0167406
Q9ZF31	IF2_SALTY	Translation initiation factor IF-2 OS=Salmonella typhimurium (strain LT2 / SGSC1412 / ATCC 700720) GN=infB PE=3 SV=2	0.0751965	0.040492	0.0570026	0.0575637	0.017359	0.229951	0.125098	0.141238	0.127594	0.15597	0.0498282	0.369069	0.0237064	0.0168076	0.0617555	0.0387333	0.0606566	0.0537151	0.0129863	0.344393	0.0194021	0.0191796
P0A1D3	CH60_SALTY	60 kDa chaperonin OS=Salmonella typhimurium (strain LT2 / SGSC1412 / ATCC 700720) GN=groL PE=3 SV=2	1.82057	1.00199	1.10022	1.30759	0.446961	3.64123	2.28999	2.7808	3.00973	2.93044	0.560975	0.446211	0.00936519	0.0118393	2.12546	1.0478	1.27987	1.48438	0.567192	0.506538	0.0201049	0.0192905
Q7CPJ3	Q7CPJ3_SALTY	Putative inner membrane lipoprotein OS=Salmonella typhimurium (strain LT2 / SGSC1412 / ATCC 700720) GN=STM3580 PE=4 SV=1	0.213387	0.0741552	0.0354845	0.107676	0.0935683		0.0134236	0.0185302	0.0172936	0.0164158	0.00266405	6.55926	0.16656	0.0305497	0.0552612	0.119307	0.0833828	0.0859835	0.0321018	5.23785	0.0201094	0.0194013
P10368	HIS7_SALTY	Histidine biosynthesis bifunctional protein HisB OS=Salmonella typhimurium (strain LT2 / SGSC1412 / ATCC 700720) GN=hisB PE=3 SV=2	0.0844285		0.0369664	0.0606975	0.0335608		0.0728131	0.0730349	0.0702907	0.0720462	0.00152439	0.84248	0.567537	0.0428118	0.0563736	0.0278638	0.0373072	0.0405149	0.0145231	0.562345	0.020122	0.0195122
P02911	ARGT_SALTY	Lysine/arginine/ornithine-binding periplasmic protein OS=Salmonella typhimurium (strain LT2 / SGSC1412 / ATCC 700720) GN=argT PE=1 SV=2							0.117582	0.0910334		0.104308	0.0187729					0.00693333	0.0128713	0.00990229	0.00419875	0.0949334	0.0201355	0.0196231
Q8ZRC9	YAJQ_SALTY	UPF0234 protein YajQ OS=Salmonella typhimurium (strain LT2 / SGSC1412 / ATCC 700720) GN=yajQ PE=3 SV=2	0.110985	0.159104	0.134575	0.134888	0.0240607	0.0840522	0.0860482	0.096218	0.0921588	0.0896193	0.0055898	1.50512	0.013345	0.0137421	0.149364	0.106395	0.123013	0.126257	0.0216676	1.40882	0.0206	0.0197339
Q8ZQ40	NQOR_SALTY	NAD(P)H dehydrogenase (quinone) OS=Salmonella typhimurium (strain LT2 / SGSC1412 / ATCC 700720) GN=STM1119 PE=3 SV=3	0.132988	0.143636	0.145419	0.140681	0.00672157		0.0417443	0.0377024	0.059237	0.0462279	0.0114461	3.0432	0.000248998	0.00264271	0.0732255	0.0679383	0.0783052	0.0731563	0.00518379	1.58251	0.0206188	0.0198448
P28354	SYK1_SALTY	Lysine--tRNA ligase OS=Salmonella typhimurium (strain LT2 / SGSC1412 / ATCC 700720) GN=lysS PE=3 SV=3	0.0958158	0.146301	0.160697	0.134271	0.0340725	0.26765	0.159066	0.178327	0.156795	0.19046	0.0523591	0.704987	0.17009	0.0307611	0.0984158	0.08185	0.0790271	0.0864309	0.0104747	0.453802	0.0211373	0.0199557
Q8ZLK3	Q8ZLK3_SALTY	Membrane protein OS=Salmonella typhimurium (strain LT2 / SGSC1412 / ATCC 700720) GN=damX PE=4 SV=1	0.0285967	0.0263836	0.0416682	0.0322162	0.00826017	0.0463808	0.0373512	0.0335987	0.0326902	0.0375052	0.00625154	0.858978	0.375619	0.0381607	0.0620486	0.0476811	0.0530946	0.0542748	0.00725613	1.44712	0.0216882	0.0200665
P0A1S0	IHFA_SALTY	Integration host factor subunit alpha OS=Salmonella typhimurium (strain LT2 / SGSC1412 / ATCC 700720) GN=ihfA PE=3 SV=1	0.197698	0.138709	0.232006	0.189471	0.0471898	0.0619885	0.137668	0.122193	0.133096	0.113736	0.035104	1.66588	0.0575117	0.022093	0.18315	0.242016	0.179767	0.201644	0.0350043	1.77291	0.0218937	0.0201774
P0A1X0	SLYB_SALTY	Outer membrane lipoprotein SlyB OS=Salmonella typhimurium (strain LT2 / SGSC1412 / ATCC 700720) GN=slyB PE=1 SV=1	0.322531	0.236803	0.153465	0.2376	0.0845357	0.143294	0.112277	0.103587	0.119139	0.119575	0.0170455	1.98704	0.0377244	0.0196617	0.476445	0.34185	0.201584	0.33996	0.13744	2.84308	0.0219081	0.0202882
Q7CPP3	Q7CPP3_SALTY	Putative ABC superfamily transport protein OS=Salmonella typhimurium (strain LT2 / SGSC1412 / ATCC 700720) GN=yrbC PE=4 SV=1	0.0725201			0.0725201			0.0464448	0.0407251	0.0519629	0.0463776	0.00561923	1.56369			0.134327	0.0824713	0.0947446	0.103847	0.0270996	2.23917	0.0228264	0.0203991
Q04866	WZZB_SALTY	Chain length determinant protein OS=Salmonella typhimurium (strain LT2 / SGSC1412 / ATCC 700720) GN=wzzB PE=1 SV=1	0.044453	0.0451898	0.0217835	0.0371421	0.013306	0.0130892	0.0256097	0.0197845	0.0147499	0.0183083	0.00563887	2.0287	0.0482039	0.0212474	0.0735506	0.0364938	0.0430242	0.0510229	0.0197809	2.78687	0.0231431	0.02051
Q7CR62	SYP_SALTY	Proline--tRNA ligase OS=Salmonella typhimurium (strain LT2 / SGSC1412 / ATCC 700720) GN=proS PE=3 SV=1	0.084751	0.0662646	0.0803977	0.0771377	0.00966474	0.0875697	0.0770849	0.0919933	0.0766774	0.0833313	0.00766562	0.925675	0.384999	0.0384778	0.0691872	0.0674229	0.0693551	0.0686551	0.00107038	0.823881	0.0235874	0.0206208
Q8ZLT4	Q8ZLT4_SALTY	ATP-dependent RNA helicase DeaD OS=Salmonella typhimurium (strain LT2 / SGSC1412 / ATCC 700720) GN=deaD PE=3 SV=1	0.0395245	0.0403469	0.0650742	0.0483152	0.0145196	0.0994271	0.0977059	0.114853	0.0562665	0.092063	0.0250788	0.524806	0.0445747	0.0208245	0.0492765	0.0368247	0.046103	0.0440681	0.00647048	0.478673	0.0249438	0.0207317
P96062	PHNS_SALTY	Putative 2-aminoethylphosphonate-binding periplasmic protein OS=Salmonella typhimurium (strain LT2 / SGSC1412 / ATCC 700720) GN=phnS PE=1 SV=1	0.0653463	0.0700915	0.0705318	0.0686565	0.00287522	0.0286561	0.0305754			0.0296157	0.00135718	2.31824	0.000422297	0.00295983	0.0979577	0.0667234	0.0748094	0.0798302	0.0162111	2.69553	0.0254489	0.0208426
Q93GL9	Q93GL9_SALTY	Conjugative transfer: surface exclusion OS=Salmonella typhimurium (strain LT2 / SGSC1412 / ATCC 700720) GN=traT PE=4 SV=1	0.442769	0.243441	0.0695574	0.251922	0.18675	0.242096	0.0517359	0.0601341	0.241713	0.14892	0.107424	1.69167	0.393443	0.0387949		0.556249	0.395829	0.476039	0.113434	3.19661	0.0256605	0.0209534
Q8ZP68	Q8ZP68_SALTY	Periplasmic murein tripeptide transport protein OS=Salmonella typhimurium (strain LT2 / SGSC1412 / ATCC 700720) GN=mppA PE=4 SV=1	0.0327316		0.0338043	0.033268	0.000758521		0.0278946	0.0208137	0.0230154	0.0239079	0.00362383	1.3915	0.0415986	0.0201903	0.0662909	0.0427172	0.044461	0.0511563	0.0131358	2.13973	0.0257353	0.0210643
Q7CPQ3	Q7CPQ3_SALTY	Putative ABC superfamily transport protein OS=Salmonella typhimurium (strain LT2 / SGSC1412 / ATCC 700720) GN=yhbS PE=4 SV=1	0.070238		0.0262418	0.0482399	0.03111		0.0476641	0.0484647	0.0456771	0.0472686	0.00143526	1.02055	0.956583	0.04926	0.0424695	0.0382006	0.0336798	0.0381166	0.00439547	0.806383	0.0265783	0.0211752
P0A1F8	DHAS_SALTY	Aspartate-semialdehyde dehydrogenase OS=Salmonella typhimurium (strain LT2 / SGSC1412 / ATCC 700720) GN=asd PE=1 SV=1	0.0659343	0.0793571	0.0859599	0.0770838	0.0102045	0.162014	0.075498	0.117997	0.105219	0.115182	0.0359407	0.669234	0.141342	0.0291755	0.0440353	0.0279592	0.0647218	0.0455721	0.0184294	0.395653	0.0294232	0.021286
Q8ZM19	Q8ZM19_SALTY	Putative ferrichrome-binding periplasmic protein OS=Salmonella typhimurium (strain LT2 / SGSC1412 / ATCC 700720) GN=STM3142 PE=4 SV=1	0.0091736		0.0181389	0.0136563	0.00633942	0.0085588	0.0129699		0.0116939	0.0110742	0.0022699	1.23316	0.540085	0.0422833	0.0293314	0.0222786	0.0176171	0.0230757	0.00589771	2.08374	0.0302324	0.0213969
Q7CPR3	Q7CPR3_SALTY	Putative inner membrane protein OS=Salmonella typhimurium (strain LT2 / SGSC1412 / ATCC 700720) GN=yqjD PE=4 SV=1	0.175094	0.165329	0.18212	0.174181	0.00843245	0.0502111	0.1027	0.117893	0.113048	0.095963	0.0311526	1.81508	0.00896196	0.0116279		0.167264	0.180498	0.173881	0.00935776	1.81196	0.0303338	0.0215078
P0A1S2	HNS_SALTY	DNA-binding protein H-NS OS=Salmonella typhimurium (strain LT2 / SGSC1412 / ATCC 700720) GN=hns PE=1 SV=2	0.719004	0.57012	0.76114	0.683421	0.100358	0.958832	0.695642	1.20842	1.15958	1.00562	0.233171	0.679603	0.0787398	0.0241015	0.637267	0.469432	0.6303	0.578999	0.0949523	0.575765	0.032456	0.0216186
Q8ZK81	RS18_SALTY	30S ribosomal protein S18 OS=Salmonella typhimurium (strain LT2 / SGSC1412 / ATCC 700720) GN=rpsR PE=3 SV=3	0.21277	0.171432	0.141371	0.175191	0.0358477	0.219038	0.240689	0.16308	0.221101	0.210977	0.0333886	0.830381	0.231256	0.0340381	0.33823	0.280299		0.309264	0.0409634	1.46587	0.0328104	0.0217295
P26397	RFBG_SALTY	CDP-glucose 4,6-dehydratase OS=Salmonella typhimurium (strain LT2 / SGSC1412 / ATCC 700720) GN=rfbG PE=1 SV=1	0.0117698	0.0200818	0.0169053	0.0162523	0.00419429		0.0393056	0.0308734	0.024406	0.0315283	0.00747136	0.515482	0.0366437	0.0194503		0.011614	0.00913173	0.0103729	0.00175525	0.329002	0.033172	0.0218404
P64052	EFTS_SALTY	Elongation factor Ts OS=Salmonella typhimurium (strain LT2 / SGSC1412 / ATCC 700720) GN=tsf PE=3 SV=1	0.355263	0.401376	0.337951	0.364863	0.0327844	0.321682	0.475336	0.454931	0.559731	0.45292	0.0985536	0.80558	0.204779	0.0327696	0.289698	0.270611	0.289688	0.283332	0.0110171	0.625568	0.0339253	0.0219512
Q8XG72	Q8XG72_SALTY	Arginine transport system OS=Salmonella typhimurium (strain LT2 / SGSC1412 / ATCC 700720) GN=artI PE=3 SV=1	0.0708544	0.140764	0.118951	0.11019	0.0357685	0.0369595	0.0677731	0.0784856		0.0610727	0.0215587	1.80423	0.111319	0.0268499	0.0922933	0.112414	0.118457	0.107721	0.0136985	1.76382	0.0340773	0.0220621
P66643	RS9_SALTY	30S ribosomal protein S9 OS=Salmonella typhimurium (strain LT2 / SGSC1412 / ATCC 700720) GN=rpsI PE=1 SV=2	0.199373	0.171555	0.20393	0.191619	0.0175253	0.426132	0.272795	0.390369	0.381726	0.367756	0.0661612	0.521051	0.00703307	0.0106765	0.492484	0.455005	0.515745	0.487745	0.0306464	1.32627	0.0351052	0.0221729
P06185	PGTE_SALTY	Outer membrane protease E OS=Salmonella typhimurium (strain LT2 / SGSC1412 / ATCC 700720) GN=pgtE PE=3 SV=2	0.212054	0.29779	0.325437	0.278427	0.0591195	0.121035	0.124586	0.139406	0.115663	0.125172	0.0101734	2.22435	0.003323	0.00792812	0.188403	0.220175	0.139704	0.182761	0.0405312	1.46007	0.0374792	0.0222838
Q7CPL7	RL17_SALTY	50S ribosomal protein L17 OS=Salmonella typhimurium (strain LT2 / SGSC1412 / ATCC 700720) GN=rplQ PE=3 SV=1	0.253226	0.221045	0.29355	0.25594	0.0363287	0.453173	0.443547	0.489945	0.485957	0.468156	0.0232505	0.546699	0.000216572	0.00243129	0.522555	0.492492	0.540216	0.518421	0.0241292	1.10737	0.0385361	0.0223947
Q7CQW0	Q7CQW0_SALTY	Glutamine high-affinity transporter OS=Salmonella typhimurium (strain LT2 / SGSC1412 / ATCC 700720) GN=glnH PE=3 SV=1	0.0904162	0.143796	0.12133	0.118514	0.0268011		0.0615275	0.0575157	0.0564436	0.0584956	0.00267983	2.02604	0.0181546	0.015222	0.0624659	0.0650062	0.0680309	0.0651677	0.002786	1.11406	0.0403577	0.0225055
P67651	RRAA_SALTY	Regulator of ribonuclease activity A OS=Salmonella typhimurium (strain LT2 / SGSC1412 / ATCC 700720) GN=rraA PE=3 SV=1	0.0504122	0.0700915	0.0459188	0.0554742	0.0128568	0.0328581	0.0310127	0.0242494		0.0293734	0.00453241	1.88858	0.0294824	0.0176533	0.0498409	0.0412218		0.0455314	0.00609465	1.55009	0.0404584	0.0226164
P0A299	RL7_SALTY	50S ribosomal protein L7/L12 OS=Salmonella typhimurium (strain LT2 / SGSC1412 / ATCC 700720) GN=rplL PE=3 SV=2	0.32404	0.168576	0.0578209	0.183479	0.133734	0.198029	0.0616673	0.0718817	0.1886	0.130045	0.073278	1.41089	0.522737	0.0421776	0.304879	1.28235	0.76739	0.784872	0.488967	6.03541	0.0414347	0.0227273
Q8ZND6	PTA_SALTY	Phosphate acetyltransferase OS=Salmonella typhimurium (strain LT2 / SGSC1412 / ATCC 700720) GN=pta PE=1 SV=1	0.0389548	0.041867	0.0388903	0.039904	0.00170029	0.0637316	0.134154	0.114124	0.147053	0.114766	0.0366209	0.3477	0.0181806	0.0153277		0.0447144	0.0116272	0.0281708	0.0233962	0.245463	0.0416357	0.0228381
P0A9Y2	CSPA_SALTY	Cold shock protein CspA OS=Salmonella typhimurium (strain LT2 / SGSC1412 / ATCC 700720) GN=cspA PE=3 SV=2	0.25008	0.38189	0.376773	0.336247	0.0746674	0.162515	0.213175	0.153274	0.0949683	0.155983	0.0484554	2.15566	0.0112651	0.012685	0.244422	0.294867	0.211589	0.250293	0.0419482	1.60461	0.0434804	0.022949
P62405	RL5_SALTY	50S ribosomal protein L5 OS=Salmonella typhimurium (strain LT2 / SGSC1412 / ATCC 700720) GN=rplE PE=3 SV=2	0.326579	0.325136	0.344052	0.331922	0.0105294	0.628495	0.504125	0.544438	0.552033	0.557273	0.051928	0.595619	0.00078626	0.0038055	0.367197	0.431921	0.506546	0.435221	0.0697332	0.780985	0.0439688	0.0230599
Q7CQ10	ISCR_SALTY	HTH-type transcriptional regulator IscR OS=Salmonella typhimurium (strain LT2 / SGSC1412 / ATCC 700720) GN=iscR PE=3 SV=1	0.109016	0.0980639	0.0710175	0.092699	0.0195589	0.0257133	0.0388914			0.0323023	0.00931839	2.86973	0.0294062	0.0175476	0.0620936	0.0619063	0.0856003	0.0698667	0.013626	2.1629	0.0447267	0.0231707
Q93GQ7	Q93GQ7_SALTY	Plasmid partition protein B OS=Salmonella typhimurium (strain LT2 / SGSC1412 / ATCC 700720) GN=parB PE=4 SV=1	0.0431114		0.0533689	0.0482402	0.00725313	0.0721171	0.0476967	0.0448117	0.0488883	0.0533784	0.0126091	0.903739	0.633292	0.0445032	0.0260373	0.035548	0.0360979	0.0325611	0.00565641	0.610004	0.0470741	0.0232816
Q7CPP7	RL21_SALTY	50S ribosomal protein L21 OS=Salmonella typhimurium (strain LT2 / SGSC1412 / ATCC 700720) GN=rplU PE=3 SV=1	0.291445	0.329581	0.311751	0.310926	0.0190814	0.345301	0.475611	0.383502	0.388985	0.39835	0.0550502	0.780534	0.0492588	0.0213531	0.667719	0.47064	0.521458	0.553272	0.102319	1.38891	0.0472481	0.0233925
Q7DAP2	Q7DAP2_SALTY	Putative carbonic anhydrase OS=Salmonella typhimurium (strain LT2 / SGSC1412 / ATCC 700720) GN=PSLT046 PE=4 SV=1		0.0438148	0.0668263	0.0553206	0.0162716	0.0714508	0.11727	0.125465	0.0992227	0.103352	0.0239264	0.535263	0.0673792	0.022833	0.0531008	0.0532422		0.0531715	9.99829e-05	0.514469	0.0489923	0.0235033
Q8ZM42	Q8ZM42_SALTY	Putative periplasmic protein OS=Salmonella typhimurium (strain LT2 / SGSC1412 / ATCC 700720) GN=yggN PE=4 SV=1	0.0460317		0.0713048	0.0586683	0.0178708		0.026066	0.0292637	0.0323909	0.0292402	0.00316252	2.00643	0.0562686	0.0219873	0.0370404	0.0402696	0.052376	0.0432286	0.0080847	1.4784	0.0492649	0.0236142
O85139	FABH_SALTY	3-oxoacyl-[acyl-carrier-protein] synthase 3 OS=Salmonella typhimurium (strain LT2 / SGSC1412 / ATCC 700720) GN=fabH PE=3 SV=1		0.0394608	0.0485937	0.0440273	0.00645791	0.0569746	0.034731	0.0461123	0.0521001	0.0474795	0.00958995	0.92729	0.677773	0.0452431	0.028754		0.0262355	0.0274947	0.00178083	0.579086	0.050707	0.0237251
Q8ZQ17	Q8ZQ17_SALTY	Ribonuclease E OS=Salmonella typhimurium (strain LT2 / SGSC1412 / ATCC 700720) GN=rne PE=3 SV=1	0.0386808	0.0134286	0.0322646	0.0281247	0.0131253	0.120195	0.11519	0.0971486	0.0790135	0.102887	0.0187422	0.273356	0.00206184	0.00665962	0.0416822	0.0716632		0.0566727	0.0211998	0.550825	0.0512317	0.0238359
P26398	RFBH_SALTY	Lipopolysaccharide biosynthesis protein RfbH OS=Salmonella typhimurium (strain LT2 / SGSC1412 / ATCC 700720) GN=rfbH PE=3 SV=1	0.0785094	0.0599093	0.0659752	0.0681313	0.00948565	0.058097	0.102392	0.124008	0.0812947	0.091448	0.0282567	0.745028	0.236352	0.0341438		0.0247571	0.040979	0.0328681	0.0114707	0.359418	0.0545869	0.0239468
Q7CP88	Q7CP88_SALTY	Putative outer membrane protein OS=Salmonella typhimurium (strain LT2 / SGSC1412 / ATCC 700720) GN=ytfM PE=4 SV=1			0.0107044	0.0107044			0.0143616		0.0125781	0.0134699	0.00126114	0.79469			0.020065		0.0179901	0.0190275	0.00146717	1.4126	0.0555875	0.0240576
Q8ZNW0	KPYK2_SALTY	Pyruvate kinase II OS=Salmonella typhimurium (strain LT2 / SGSC1412 / ATCC 700720) GN=pykA PE=3 SV=3	0.0446585	0.0357867	0.0341822	0.0382091	0.00564261	0.144252	0.0771175	0.0742892	0.077879	0.0933845	0.0339471	0.409159	0.0416574	0.020296		0.0222958	0.0284409	0.0253684	0.00434524	0.271655	0.0561444	0.0241685
Q8ZRD7	Q8ZRD7_SALTY	Protein translocase subunit SecD OS=Salmonella typhimurium (strain LT2 / SGSC1412 / ATCC 700720) GN=secD PE=3 SV=1	0.160584	0.0649049	0.0610564	0.0955151	0.0563842	0.0653831	0.0716123	0.0633248	0.0526246	0.0632362	0.0079032	1.51045	0.295443	0.0363636	0.0569044	0.046732	0.0428217	0.0488194	0.0072697	0.772016	0.0568438	0.0242794
Q8ZPM0	Q8ZPM0_SALTY	Putative oxidoreductase OS=Salmonella typhimurium (strain LT2 / SGSC1412 / ATCC 700720) GN=ydgJ PE=4 SV=1	0.0596242	0.0384373	0.110646	0.0695693	0.0371176	0.0392455	0.0550821	0.0505856	0.0534971	0.0496026	0.00715142	1.40253	0.327903	0.0375264	0.0252541	0.0415668	0.0382459	0.0350223	0.00862087	0.706058	0.0575055	0.0243902
Q7CPC0	CPTA_SALTY	Phosphoethanolamine transferase CptA OS=Salmonella typhimurium (strain LT2 / SGSC1412 / ATCC 700720) GN=cptA PE=1 SV=1	0.0422477		0.0382578	0.0402528	0.00282125	0.0321006	0.0358992			0.0339999	0.00268598	1.18391	0.15123	0.0301268	0.0416739	0.045008	0.0390391	0.041907	0.00299127	1.23256	0.0579469	0.0245011
P37432	OMPF_SALTY	Outer membrane protein F OS=Salmonella typhimurium (strain LT2 / SGSC1412 / ATCC 700720) GN=ompF PE=1 SV=2	0.0869563	0.0819007	0.0777024	0.0821865	0.00463352	0.0715833	0.0555243	0.0213849	0.0429248	0.0478543	0.0211882	1.71743	0.042977	0.0206131	0.115421	0.0763093	0.0748947	0.0888751	0.0230006	1.8572	0.0580094	0.024612
Q8ZPL0	Q8ZPL0_SALTY	NAD(P) transhydrogenase subunit alpha OS=Salmonella typhimurium (strain LT2 / SGSC1412 / ATCC 700720) GN=pntA PE=3 SV=1	0.0669835	0.0448078	0.100434	0.0707417	0.0280028	0.183963	0.130138	0.150122	0.140764	0.151247	0.0232888	0.467724	0.00874315	0.0115222	0.139302	0.0756266	0.0719308	0.0956199	0.0378752	0.632212	0.0594696	0.0247228
Q7CQV8	Q7CQV8_SALTY	Outer membrane protease, receptor for phage OX2 OS=Salmonella typhimurium (strain LT2 / SGSC1412 / ATCC 700720) GN=ompX PE=4 SV=1	0.996954	1.17952	1.31609	1.16419	0.160117	1.10204	1.1451	1.04687	0.946374	1.0601	0.0858143	1.09819	0.311648	0.0367865	1.15241	1.23228	1.188	1.1909	0.0400137	1.12338	0.0610292	0.0248337
Q9L6M9	DLHH_SALTY	Putative carboxymethylenebutenolidase OS=Salmonella typhimurium (strain LT2 / SGSC1412 / ATCC 700720) GN=ysgA PE=3 SV=1	0.0622889	0.0630258	0.0996453	0.0749867	0.0213581		0.0557545	0.0999979	0.0797056	0.078486	0.0221469	0.955415	0.853438	0.0477801	0.0447925	0.0453389	0.0470269	0.0457194	0.00116479	0.582517	0.0627012	0.0249446
O30911	HSLU_SALTY	ATP-dependent protease ATPase subunit HslU OS=Salmonella typhimurium (strain LT2 / SGSC1412 / ATCC 700720) GN=hslU PE=3 SV=2	0.0924745	0.122897	0.101408	0.105593	0.015637		0.110425	0.112587	0.102651	0.108554	0.0052253	0.972723	0.77128	0.046723	0.199941	0.137181	0.141927	0.159683	0.0349453	1.471	0.0663177	0.0250554
P33321	IF3_SALTY	Translation initiation factor IF-3 OS=Salmonella typhimurium (strain LT2 / SGSC1412 / ATCC 700720) GN=infC PE=3 SV=1	0.0652393	0.0551352	0.0715531	0.0639759	0.00828155	0.0978303	0.116884	0.126939	0.106701	0.112089	0.0125942	0.570762	0.00233911	0.00708245	0.0751465	0.0867589	0.103375	0.0884269	0.0141882	0.788902	0.0666043	0.0251663
P43019	SODM_SALTY	Superoxide dismutase [Mn] OS=Salmonella typhimurium (strain LT2 / SGSC1412 / ATCC 700720) GN=sodA PE=3 SV=3	0.400491	0.746983	0.765759	0.637745	0.205682	0.0825237	0.0908369	0.147266	0.316024	0.159163	0.108457	4.00687	0.00985972	0.0121564	0.234488	0.431596	0.37219	0.346091	0.101113	2.17445	0.0682145	0.0252772
P0A2H9	DSBA_SALTY	Thiol:disulfide interchange protein DsbA OS=Salmonella typhimurium (strain LT2 / SGSC1412 / ATCC 700720) GN=dsbA PE=1 SV=1	0.130861	0.211115	0.180152	0.174043	0.0404741	0.0389532	0.0981064	0.126765	0.0790316	0.085714	0.0368328	2.03051	0.0295129	0.017759	0.182687	0.133487	0.124259	0.146811	0.0314105	1.7128	0.0696862	0.025388
Q8ZLM1	RS13_SALTY	30S ribosomal protein S13 OS=Salmonella typhimurium (strain LT2 / SGSC1412 / ATCC 700720) GN=rpsM PE=3 SV=3	0.380969	0.330582	0.39219	0.367914	0.0328134	0.700526	0.690471	0.642367	0.568436	0.65045	0.0602798	0.565629	0.000784827	0.00369979	0.73685	0.742708	0.720599	0.733386	0.0114546	1.12751	0.0699377	0.0254989
Q8ZLM6	FMT_SALTY	Methionyl-tRNA formyltransferase OS=Salmonella typhimurium (strain LT2 / SGSC1412 / ATCC 700720) GN=fmt PE=3 SV=3	0.0225205		0.0180296	0.0202751	0.00317556	0.0331362	0.0195926		0.0214354	0.0247214	0.00734543	0.820142	0.493981	0.041649	0.00629743	0.0179806	0.00941436	0.0112308	0.00604967	0.454294	0.0700301	0.0256098
Q8ZS17	YAAA_SALTY	UPF0246 protein YaaA OS=Salmonella typhimurium (strain LT2 / SGSC1412 / ATCC 700720) GN=yaaA PE=3 SV=1	0.0615438	0.0638966	0.0690812	0.0648405	0.0038563		0.0474315	0.0375696		0.0425005	0.00697339	1.52564	0.0173252	0.0149049	0.0804769	0.0808973	0.124458	0.0952775	0.0252722	2.2418	0.0707451	0.0257206
Q8ZN59	Q8ZN59_SALTY	Inosine-5'-monophosphate dehydrogenase OS=Salmonella typhimurium (strain LT2 / SGSC1412 / ATCC 700720) GN=guaB PE=3 SV=1	0.265445	0.20149	0.278772	0.248569	0.0413123	0.530729	0.249503	0.26639	0.257616	0.326059	0.13662	0.762342	0.394687	0.0389006	0.104555	0.138058	0.174841	0.139151	0.0351556	0.426767	0.07307	0.0258315
Q8ZQX1	FLAV_SALTY	Flavodoxin-1 OS=Salmonella typhimurium (strain LT2 / SGSC1412 / ATCC 700720) GN=fldA PE=1 SV=3	0.0868042	0.0875074	0.0630833	0.0791316	0.0139027		0.0499259	0.0684459	0.0455917	0.0546545	0.0121387	1.44785	0.0832056	0.0245243	0.100341	0.162675	0.08316	0.115392	0.04184	2.1113	0.0731748	0.0259424
P0A1S4	STPA_SALTY	DNA-binding protein StpA OS=Salmonella typhimurium (strain LT2 / SGSC1412 / ATCC 700720) GN=stpA PE=3 SV=1	0.144943	0.130818	0.174179	0.14998	0.0221151	0.158587	0.149047	0.164542	0.150469	0.155661	0.0072606	0.963503	0.642626	0.0448203	0.222595	0.162389	0.185256	0.19008	0.0303914	1.22111	0.0742613	0.0260532
Q7CQW9	Q7CQW9_SALTY	Tol protein required for outer membrane integrity OS=Salmonella typhimurium (strain LT2 / SGSC1412 / ATCC 700720) GN=pal PE=3 SV=1	0.340955		0.142076	0.241515	0.140629	0.199712	0.509458	0.595434	0.599784	0.476097	0.188893	0.507282	0.202841	0.0326638	1.02811	0.707317	0.672941	0.802789	0.195889	1.68619	0.0760646	0.0261641
Q8ZLA9	Q8ZLA9_SALTY	Dipeptide transport protein OS=Salmonella typhimurium (strain LT2 / SGSC1412 / ATCC 700720) GN=dppA PE=4 SV=1	0.0569194	0.0485049	0.052104	0.0525095	0.00422189		0.0371231	0.0267033		0.0319132	0.00736786	1.64538	0.0259033	0.0172304	0.0967643	0.100332	0.0536325	0.0835764	0.0259934	2.61887	0.0793713	0.0262749
Q8ZR92	Q8ZR92_SALTY	Putative thioredoxin protein OS=Salmonella typhimurium (strain LT2 / SGSC1412 / ATCC 700720) GN=ybbN PE=1 SV=1	0.0338977	0.0628807	0.0380236	0.044934	0.0156786		0.0401153	0.0521148	0.0730718	0.0551006	0.0166799	0.81549	0.484661	0.0413319	0.0178827	0.0351216	0.0345184	0.0291742	0.00978341	0.529472	0.0809384	0.0263858
P67912	HLDD_SALTY	ADP-L-glycero-D-manno-heptose-6-epimerase OS=Salmonella typhimurium (strain LT2 / SGSC1412 / ATCC 700720) GN=hldD PE=3 SV=1	0.0693659	0.0699234	0.0719107	0.0704	0.00133766	0.0883546	0.0597405	0.0885365	0.0664717	0.0757758	0.0148858	0.929056	0.569255	0.0430233	0.0540507	0.0540408	0.0612149	0.0564354	0.00413914	0.744769	0.0851412	0.0264967
P60802	PDXB_SALTY	Erythronate-4-phosphate dehydrogenase OS=Salmonella typhimurium (strain LT2 / SGSC1412 / ATCC 700720) GN=pdxB PE=1 SV=1	0.0437379	0.0334569	0.0349661	0.037387	0.00555159		0.0559942	0.0358295	0.0337089	0.0418442	0.0123	0.893481	0.597886	0.0434461	0.0216261		0.0126947	0.0171604	0.0063154	0.410102	0.0853657	0.0266075
Q7CQ23	Q7CQ23_SALTY	Thioredoxin dependent thiol peroxidase OS=Salmonella typhimurium (strain LT2 / SGSC1412 / ATCC 700720) GN=bcp PE=4 SV=1	0.0768521	0.0803654	0.0811862	0.0794679	0.00230224	0.102306	0.0991348	0.110489	0.133865	0.111449	0.015691	0.713045	0.018825	0.0154334	0.0982018	0.0850758	0.0887769	0.0906848	0.00676782	0.813692	0.0886486	0.0267184
Q8ZPG5	Q8ZPG5_SALTY	PhoPQ-regulated protein OS=Salmonella typhimurium (strain LT2 / SGSC1412 / ATCC 700720) GN=pqaA PE=4 SV=1	0.101	0.0995916	0.145823	0.115472	0.0262947		0.0391336	0.0335465	0.0346662	0.0357821	0.00295598	3.22708	0.0064436	0.0103594	0.0587652	0.0969252	0.0494297	0.0683734	0.0251634	1.91083	0.0898091	0.0268293
Q8ZKX5	Q8ZKX5_SALTY	Phosphate-binding protein PstS OS=Salmonella typhimurium (strain LT2 / SGSC1412 / ATCC 700720) GN=pstS PE=3 SV=1	1.18849	1.52127	1.39116	1.36698	0.167707	1.14215	1.08655	0.982503	0.892242	1.02586	0.110965	1.33251	0.0221635	0.0164905	2.12609	1.33616	1.19127	1.55118	0.503137	1.51207	0.091286	0.0269401
Q7CQ39	Q7CQ39_SALTY	Putative aspartate-semialdehyde dehydrogenase OS=Salmonella typhimurium (strain LT2 / SGSC1412 / ATCC 700720) GN=usg PE=3 SV=1			0.0396835	0.0396835			0.0228501		0.0263702	0.0246101	0.00248909	1.61249			0.0190655		0.0160552	0.0175604	0.00212855	0.713541	0.0930887	0.027051
Q8ZP42	Q8ZP42_SALTY	Formyltetrahydrofolate deformylase OS=Salmonella typhimurium (strain LT2 / SGSC1412 / ATCC 700720) GN=purU PE=3 SV=1			0.037641	0.037641		0.0377305	0.0209142	0.0242411		0.0276286	0.0089052	1.36239				0.00950412	0.013367	0.0114356	0.00273148	0.413903	0.0972504	0.0271619
Q8ZLJ4	HSLO_SALTY	33 kDa chaperonin OS=Salmonella typhimurium (strain LT2 / SGSC1412 / ATCC 700720) GN=hslO PE=3 SV=2	0.1302	0.135019	0.0761565	0.113792	0.0326821	0.0613865	0.0907115	0.0289229		0.0603403	0.0309076	1.88584	0.108679	0.0265328		0.00388165	0.00684845	0.00536505	0.00209785	0.0889132	0.0972988	0.0272727
P0A1P0	G3P1_SALTY	Glyceraldehyde-3-phosphate dehydrogenase OS=Salmonella typhimurium (strain LT2 / SGSC1412 / ATCC 700720) GN=gapA PE=3 SV=2	1.47983	1.36164	1.55827	1.46658	0.098984	2.27993	1.75176	1.56235	1.6693	1.81584	0.318967	0.807661	0.132759	0.0287526	1.52073	1.24061	1.4571	1.40615	0.146848	0.774382	0.0978344	0.0273836
Q8ZK80	RL9_SALTY	50S ribosomal protein L9 OS=Salmonella typhimurium (strain LT2 / SGSC1412 / ATCC 700720) GN=rplI PE=3 SV=1	0.291749	0.0902115	0.0469463	0.142969	0.130651	0.223833	0.120998	0.127799	0.218319	0.172738	0.0559312	0.827666	0.693462	0.0455603	0.153134	0.527982	0.756572	0.479229	0.304659	2.77432	0.0978711	0.0274945
Q7CR43	Q7CR43_SALTY	Response regulator in two-component regulatory system with PhoR (Or CreC) OS=Salmonella typhimurium (strain LT2 / SGSC1412 / ATCC 700720) GN=phoB PE=4 SV=1	0.175373	0.160532	0.211919	0.182608	0.0264463	0.120232	0.143481	0.143631	0.138336	0.13642	0.0110692	1.33857	0.0235321	0.0167019	0.144834	0.14986	0.160983	0.151892	0.00826412	1.11342	0.0996964	0.0276053
P63923	DEOB_SALTY	Phosphopentomutase OS=Salmonella typhimurium (strain LT2 / SGSC1412 / ATCC 700720) GN=deoB PE=3 SV=1	0.0557132	0.0431044	0.0490247	0.0492808	0.00630829		0.0640544		0.0466712	0.0553628	0.0122918	0.890142	0.502629	0.0418605		0.0162584	0.0300176	0.023138	0.00972927	0.417934	0.100758	0.0277162
Q8ZMW8	Q8ZMW8_SALTY	Outer membrane protein assembly factor BamD OS=Salmonella typhimurium (strain LT2 / SGSC1412 / ATCC 700720) GN=yfiO PE=3 SV=1		0.0739948	0.047599	0.0607969	0.0186647		0.04597	0.0445749	0.0532895	0.0479448	0.00468092	1.26806	0.305922	0.0366808	0.0506111	0.11651	0.114262	0.0937944	0.0374147	1.9563	0.102941	0.0278271
Q7CR92	Q7CR92_SALTY	Peptidyl-prolyl cis-trans isomerase OS=Salmonella typhimurium (strain LT2 / SGSC1412 / ATCC 700720) GN=slpA PE=4 SV=1			0.0416276	0.0416276		0.0140839	0.0145431			0.0143135	0.000324716	2.90827			0.0282533	0.0553039	0.0335334	0.0390302	0.0143386	2.7268	0.103802	0.0279379
Q7CPC8	Q7CPC8_SALTY	Putative enzyme OS=Salmonella typhimurium (strain LT2 / SGSC1412 / ATCC 700720) GN=yihX PE=4 SV=1	0.0789889	0.0866519	0.07764	0.0810936	0.00486067		0.0643011		0.0708029	0.067552	0.00459747	1.20046	0.0530093	0.0217759	0.0162188		0.0423533	0.029286	0.0184799	0.433533	0.104734	0.0280488
P0A2A5	RL28_SALTY	50S ribosomal protein L28 OS=Salmonella typhimurium (strain LT2 / SGSC1412 / ATCC 700720) GN=rpmB PE=3 SV=2	0.0695129		0.0959538	0.0827333	0.0186965	0.198681	0.115009		0.238358	0.184016	0.0629688	0.449599	0.125138	0.0281184	0.220074	0.322217	0.322089	0.288127	0.0589352	1.56577	0.104734	0.0281596
P65363	MINE_SALTY	Cell division topological specificity factor OS=Salmonella typhimurium (strain LT2 / SGSC1412 / ATCC 700720) GN=minE PE=3 SV=1	0.0443059	0.040767	0.0382828	0.0411186	0.00302691	0.0206993			0.0342697	0.0274845	0.00959569	1.49606	0.0907055	0.0256871	0.0443178	0.0515759	0.0369842	0.0442927	0.00729586	1.61155	0.10859	0.0282705
P68684	RS21_SALTY	30S ribosomal protein S21 OS=Salmonella typhimurium (strain LT2 / SGSC1412 / ATCC 700720) GN=rpsU PE=3 SV=2	0.0921503	0.0725817	0.105965	0.0902323	0.016774	0.0872687	0.168131	0.156	0.159759	0.14279	0.0373597	0.631924	0.075915	0.0237844	0.109372	0.1005	0.0844642	0.098112	0.0126244	0.687108	0.108866	0.0283814
P66073	RL15_SALTY	50S ribosomal protein L15 OS=Salmonella typhimurium (strain LT2 / SGSC1412 / ATCC 700720) GN=rplO PE=3 SV=1	0.447109	0.405814	0.461443	0.438122	0.0288826	0.625475	0.810432	0.910578	0.455079	0.700391	0.201724	0.625539	0.0808302	0.0243129	0.859442	0.939805	1.03224	0.943829	0.0864691	1.34757	0.11216	0.0284922
H9L493	H9L493_SALTY	Fur regulated Salmonella iron transporter OS=Salmonella typhimurium (strain LT2 / SGSC1412 / ATCC 700720) GN=sitB PE=3 SV=1	0.100363	0.112241	0.0940987	0.102234	0.00921481	0.392631	0.181632	0.21596	0.238413	0.257159	0.093284	0.397553	0.0380765	0.0198732	0.152274	0.134078	0.163919	0.15009	0.01504	0.583648	0.112424	0.0286031
P23905	DGAL_SALTY	D-galactose-binding periplasmic protein OS=Salmonella typhimurium (strain LT2 / SGSC1412 / ATCC 700720) GN=mglB PE=1 SV=2	0.0910143	0.096773	0.0990285	0.0956053	0.00413273	0.0273147	0.0370253	0.04102	0.0368075	0.0355419	0.00581658	2.68993	2.30954e-05	0.000211416	0.057606	0.0348689	0.0525687	0.0483479	0.0119418	1.36031	0.114894	0.028714
P0A1R6	DBHA_SALTY	DNA-binding protein HU-alpha OS=Salmonella typhimurium (strain LT2 / SGSC1412 / ATCC 700720) GN=hupA PE=3 SV=1	1.73165	1.09503	0.631459	1.15271	0.552358	1.06955	0.420287	0.312711	1.27708	0.769906	0.47549	1.49721	0.368812	0.038055	0.710607	2.36436	2.19293	1.75597	0.909356	2.28075	0.1173	0.0288248
P64281	GREA_SALTY	Transcription elongation factor GreA OS=Salmonella typhimurium (strain LT2 / SGSC1412 / ATCC 700720) GN=greA PE=3 SV=1	0.0868577	0.078471	0.0722324	0.079187	0.00733891	0.0479002	0.0509868	0.0635415	0.0414312	0.0509649	0.00928181	1.55375	0.00758578	0.0110994	0.033248	0.0400491		0.0366486	0.00480914	0.719093	0.12013	0.0289357
Q8ZME3	Q8ZME3_SALTY	Putative transcriptional regulators containing the CopG/Arc/MetJ DNA-binding domain and a metal-binding domain OS=Salmonella typhimurium (strain LT2 / SGSC1412 / ATCC 700720) GN=STM2955 PE=4 SV=1							0.0157064		0.0122062	0.0139563	0.00247501					0.00242716	0.00807998	0.00525357	0.00399714	0.37643	0.120175	0.0290466
Q8ZL67	MTLD_SALTY	Mannitol-1-phosphate 5-dehydrogenase OS=Salmonella typhimurium (strain LT2 / SGSC1412 / ATCC 700720) GN=mtlD PE=3 SV=1	0.0905231	0.116954	0.125865	0.111114	0.0183805	0.0588542	0.0334605	0.0625734	0.0550589	0.0524867	0.0130499	2.117	0.00416553	0.00856237	0.119663	0.0609709	0.0715351	0.0840563	0.0312854	1.60148	0.121923	0.0291574
P05416	GLGA_SALTY	Glycogen synthase OS=Salmonella typhimurium (strain LT2 / SGSC1412 / ATCC 700720) GN=glgA PE=3 SV=2		0.0221366	0.0326691	0.0274028	0.0074476		0.0705513	0.0510079	0.0318541	0.0511378	0.019349	0.535863	0.210492	0.0331924	0.0158978		0.0238378	0.0198678	0.00561437	0.388515	0.123714	0.0292683
Q8ZN71	DAPA_SALTY	4-hydroxy-tetrahydrodipicolinate synthase OS=Salmonella typhimurium (strain LT2 / SGSC1412 / ATCC 700720) GN=dapA PE=1 SV=1	0.0778512	0.0720241	0.0761565	0.0753439	0.00299734	0.13609	0.0633936	0.0599203	0.0767441	0.084037	0.0354518	0.896556	0.69638	0.045666	0.0523696	0.0400987	0.0421082	0.0448588	0.00658168	0.533798	0.124045	0.0293792
Q8ZM35	Q8ZM35_SALTY	Putative monoamine oxidase OS=Salmonella typhimurium (strain LT2 / SGSC1412 / ATCC 700720) GN=STM3119 PE=4 SV=1	0.652432	0.806931	0.582295	0.680553	0.114928		0.100159	0.102518	0.224093	0.142257	0.0708823	4.78398	0.00230735	0.00697674	0.179552	0.429535	0.299425	0.302837	0.125026	2.12881	0.125062	0.02949
Q7CPZ7	Q7CPZ7_SALTY	Signal recognition particle protein OS=Salmonella typhimurium (strain LT2 / SGSC1412 / ATCC 700720) GN=ffh PE=3 SV=1	0.0335853	0.0251309	0.030814	0.0298434	0.00430997	0.0452267	0.0409581	0.0340435	0.0299816	0.0375525	0.00683428	0.794711	0.150817	0.0300211	0.0331262	0.0259861	0.0292944	0.0294689	0.00357325	0.784739	0.125348	0.0296009
P0A1D5	CH10_SALTY	10 kDa chaperonin OS=Salmonella typhimurium (strain LT2 / SGSC1412 / ATCC 700720) GN=groS PE=3 SV=1	1.98247	1.57852	1.02387	1.52829	0.481269	0.913638	0.725477	0.680867	0.905199	0.806295	0.12051	1.89544	0.0311865	0.0180761	0.683638	1.67419	1.54632	1.30138	0.538789	1.61403	0.126006	0.0297118
Q8ZNL0	Q8ZNL0_SALTY	Outer membrane porin OS=Salmonella typhimurium (strain LT2 / SGSC1412 / ATCC 700720) GN=cirA PE=3 SV=1	0.0354364	0.0332812	0.0157029	0.0281402	0.0108248		0.0453789	0.168091	0.132334	0.115268	0.0631112	0.244128	0.077938	0.0239958	0.0542091	0.0349644	0.0433772	0.0441835	0.00964766	0.383311	0.126037	0.0298226
Q8ZM45	RDGB_SALTY	dITP/XTP pyrophosphatase OS=Salmonella typhimurium (strain LT2 / SGSC1412 / ATCC 700720) GN=rdgB PE=3 SV=1						0.0587447	0.0263774	0.0322981	0.0399216	0.0393354	0.0140771					0.0191823	0.0188839	0.0190331	0.000211047	0.483866	0.126849	0.0299335
Q7CQI9	Q7CQI9_SALTY	Alcohol dehydrogenase OS=Salmonella typhimurium (strain LT2 / SGSC1412 / ATCC 700720) GN=adhP PE=3 SV=1	0.0675031	0.0653403	0.0894171	0.0740868	0.0133204		0.0501676	0.0415287	0.0544976	0.0487313	0.00660264	1.52031	0.0418029	0.0204017	0.0474624	0.0267302	0.0247023	0.032965	0.012596	0.676464	0.127245	0.0300443
Q8ZKR6	Q8ZKR6_SALTY	Response reguator in two-component regulatory system with CpxA OS=Salmonella typhimurium (strain LT2 / SGSC1412 / ATCC 700720) GN=cpxR PE=4 SV=1	0.040298	0.0906774	0.0957836	0.0755863	0.030667		0.0426704		0.0342515	0.038461	0.00595301	1.96527	0.205968	0.0328753		0.028891	0.0247023	0.0267967	0.00296182	0.696724	0.131238	0.0301552
P65748	IPYR_SALTY	Inorganic pyrophosphatase OS=Salmonella typhimurium (strain LT2 / SGSC1412 / ATCC 700720) GN=ppa PE=3 SV=2	0.0796939	0.0924725	0.109371	0.0938457	0.0148859		0.128677	0.245877	0.0763663	0.150307	0.0868008	0.624361	0.329065	0.0376321	0.0506519	0.0635994	0.052907	0.0557194	0.0069168	0.370705	0.133056	0.0302661
P0A1C3	ACCA_SALTY	Acetyl-coenzyme A carboxylase carboxyl transferase subunit alpha OS=Salmonella typhimurium (strain LT2 / SGSC1412 / ATCC 700720) GN=accA PE=3 SV=2	0.0781853	0.0989118	0.0910708	0.0893893	0.0104651	0.103871	0.129678	0.0983799	0.080252	0.103045	0.0204227	0.867477	0.344873	0.0378436	0.0890506	0.0773538	0.0750346	0.0804797	0.00751268	0.781014	0.133686	0.0303769
Q7CQ97	Q7CQ97_SALTY	3-oxoacyl-[acyl-carrier-protein] synthase I OS=Salmonella typhimurium (strain LT2 / SGSC1412 / ATCC 700720) GN=fbaB PE=4 SV=1	0.142337	0.102433	0.113067	0.119279	0.0206645		0.147734	0.0794562	0.246154	0.157781	0.0838018	0.755976	0.482853	0.0412262	0.0415415	0.0175097		0.0295256	0.0169931	0.18713	0.135012	0.0304878
P67617	FETP_SALTY	Probable Fe(2+)-trafficking protein OS=Salmonella typhimurium (strain LT2 / SGSC1412 / ATCC 700720) GN=yggX PE=1 SV=2	0.0361815	0.0450064	0.0319586	0.0377155	0.00665782	0.00501647	0.0268476		0.0459882	0.0259508	0.0205006	1.45335	0.397998	0.0390063	0.0739141	0.0317659	0.0763036	0.0606612	0.0250526	2.33755	0.136843	0.0305987
Q7CPM1	Q7CPM1_SALTY	AcetylCoA carboxylase, BCCP subunit OS=Salmonella typhimurium (strain LT2 / SGSC1412 / ATCC 700720) GN=accB PE=4 SV=1	0.112711	0.0836652	0.0471321	0.0811695	0.0328607	0.0475419	0.0467215		0.0428404	0.0457013	0.0025113	1.77609	0.135762	0.0288584	0.0434578	0.0810578	0.0839309	0.0694822	0.0225835	1.52035	0.144093	0.0307095
Q7CR46	IRAP_SALTY	Anti-adapter protein IraP OS=Salmonella typhimurium (strain LT2 / SGSC1412 / ATCC 700720) GN=iraP PE=2 SV=2	0.428715	0.48977	0.357058	0.425181	0.0664264	0.720137	0.238203	0.341379	0.385667	0.421347	0.208555	1.0091	0.977169	0.0496829	0.526718	0.725315	0.707675	0.653236	0.109922	1.55035	0.144869	0.0308204
P66593	RS6_SALTY	30S ribosomal protein S6 OS=Salmonella typhimurium (strain LT2 / SGSC1412 / ATCC 700720) GN=rpsF PE=3 SV=1	0.268945	0.22737	0.388835	0.29505	0.0838386	0.0318543	0.208368		0.0998449	0.113356	0.0890291	2.60287	0.0617565	0.0225159	0.0294337	0.015787	0.0169689	0.0207299	0.00756086	0.182875	0.146996	0.0309313
Q8ZK71	MSRA_SALTY	Peptide methionine sulfoxide reductase MsrA OS=Salmonella typhimurium (strain LT2 / SGSC1412 / ATCC 700720) GN=msrA PE=3 SV=1	0.102577	0.160043	0.178695	0.147105	0.0396743	0.0912175	0.127397	0.153569	0.0935499	0.116433	0.02977	1.26343	0.291656	0.0362579	0.203762	0.137154		0.170458	0.0470991	1.464	0.148549	0.0310421
O54296	RS11_SALTY	30S ribosomal protein S11 OS=Salmonella typhimurium (strain LT2 / SGSC1412 / ATCC 700720) GN=rpsK PE=3 SV=2	0.101558	0.0786085	0.0919375	0.0907013	0.0115245	0.27725	0.204705	0.326975	0.315669	0.28115	0.0552283	0.322608	0.0022384	0.00687104	0.259374	0.20144	0.195795	0.218869	0.0351912	0.778479	0.15163	0.031153
Q7CQG3	Q7CQG3_SALTY	Putative peptidase OS=Salmonella typhimurium (strain LT2 / SGSC1412 / ATCC 700720) GN=sohB PE=4 SV=1	0.0423763	0.0535311	0.0504082	0.0487719	0.00575459		0.0484272	0.0378816	0.0310643	0.0391244	0.00874792	1.24659	0.185759	0.0316068	0.0491736	0.059496	0.0443461	0.0510052	0.00773926	1.30367	0.152889	0.0312639
P26219	CDH_SALTY	CDP-diacylglycerol pyrophosphatase OS=Salmonella typhimurium (strain LT2 / SGSC1412 / ATCC 700720) GN=cdh PE=3 SV=2	0.228538	0.271704	0.305577	0.268606	0.0386127	0.268951	0.226741	0.318282	0.253962	0.266984	0.0384034	1.00608	0.958122	0.0493658	0.169831	0.240115	0.2397	0.216549	0.0404589	0.811093	0.153214	0.0313747
Q8ZRU8	RSMH_SALTY	Ribosomal RNA small subunit methyltransferase H OS=Salmonella typhimurium (strain LT2 / SGSC1412 / ATCC 700720) GN=rsmH PE=3 SV=1			0.028392	0.028392			0.0190757	0.0138196		0.0164477	0.0037166	1.7262			0.0190123	0.0289373	0.025262	0.0244039	0.00501788	1.48373	0.156006	0.0314856
Q8ZP20	TREA_SALTY	Periplasmic trehalase OS=Salmonella typhimurium (strain LT2 / SGSC1412 / ATCC 700720) GN=treA PE=3 SV=1	0.0650522	0.0758739	0.0829633	0.0746298	0.00902011	0.0275519	0.0301052	0.0369798	0.0339405	0.0321443	0.00415757	2.32171	0.000372378	0.00285412	0.0428632	0.0436626	0.0309216	0.0391491	0.00713646	1.21792	0.159011	0.0315965
Q9ZF60	GLTI_SALTY	Glutamate/aspartate periplasmic-binding protein OS=Salmonella typhimurium (strain LT2 / SGSC1412 / ATCC 700720) GN=gltI PE=3 SV=3	0.0253423	0.0489556	0.019346	0.0312146	0.0156539		0.0404181		0.0416601	0.0410391	0.000878224	0.760606	0.461921	0.0406977	0.0388544	0.0261225	0.0315323	0.0321697	0.00638987	0.78388	0.160862	0.0317073
Q8ZRF0	Q8ZRF0_SALTY	Pyrroline-5-carboxylate reductase OS=Salmonella typhimurium (strain LT2 / SGSC1412 / ATCC 700720) GN=proC PE=3 SV=1	0.0472948	0.0698471	0.0471477	0.0547632	0.0130632	0.0806511	0.0278459	0.0270212	0.0472966	0.0457037	0.0251117	1.19822	0.598832	0.0435518		0.00683606	0.0191415	0.0129888	0.00870124	0.284195	0.163724	0.0318182
Q8ZQ55	Q8ZQ55_SALTY	Pathogenicity island encoded protein: SPI5 OS=Salmonella typhimurium (strain LT2 / SGSC1412 / ATCC 700720) GN=pipD PE=4 SV=1	0.0378772	0.028087	0.054095	0.0400198	0.0131357		0.016828		0.0213746	0.0191013	0.00321494	2.09513	0.125934	0.0284355	0.0851063	0.0423999	0.0373419	0.0549494	0.0262388	2.87674	0.165305	0.031929
Q8ZKW8	ATPG_SALTY	ATP synthase gamma chain OS=Salmonella typhimurium (strain LT2 / SGSC1412 / ATCC 700720) GN=atpG PE=2 SV=1	0.144689	0.130054	0.198845	0.157863	0.0362384	0.313757	0.123307	0.150613	0.17762	0.191324	0.0845803	0.825107	0.555633	0.0424947	0.122322	0.10589	0.101175	0.109796	0.0111015	0.573872	0.166148	0.0320399
Q7CQN4	LPP1_SALTY	Major outer membrane lipoprotein 1 OS=Salmonella typhimurium (strain LT2 / SGSC1412 / ATCC 700720) GN=lpp1 PE=3 SV=1	1.20648	0.993969	0.628572	0.943008	0.292307	2.46288	1.1356	1.68022	1.17303	1.61293	0.618681	0.584655	0.148406	0.0298097	1.18443	1.129	0.602211	0.97188	0.32134	0.602555	0.167788	0.0321508
Q56073	DNAK_SALTY	Chaperone protein DnaK OS=Salmonella typhimurium (strain LT2 / SGSC1412 / ATCC 700720) GN=dnaK PE=3 SV=2	0.63095	0.650905	0.706781	0.662879	0.039308	1.03119	0.89816	0.938489	0.926903	0.948686	0.0575571	0.698734	0.00074072	0.00348837	1.35347	0.937931	1.07268	1.12136	0.212004	1.18201	0.170492	0.0322616
P60817	YFBU_SALTY	UPF0304 protein YfbU OS=Salmonella typhimurium (strain LT2 / SGSC1412 / ATCC 700720) GN=yfbU PE=3 SV=1	0.062299	0.0546998	0.0599414	0.0589801	0.00388974	0.0467757	0.0432895		0.0341966	0.0414206	0.00649446	1.42393	0.0158963	0.0145877	0.033524	0.0387642	0.0271918	0.03316	0.00579477	0.800568	0.175555	0.0323725
Q8ZRT1	Q8ZRT1_SALTY	Acetyltransferase component of pyruvate dehydrogenase complex OS=Salmonella typhimurium (strain LT2 / SGSC1412 / ATCC 700720) GN=aceF PE=3 SV=1	0.279792	0.331124	0.329491	0.313469	0.0291763	0.188507	0.416322	0.318271	0.279118	0.300554	0.0943929	1.04297	0.831451	0.047463	0.231467	0.192567	0.210288	0.211441	0.0194759	0.703502	0.176392	0.0324834
P0A1F6	UDP_SALTY	Uridine phosphorylase OS=Salmonella typhimurium (strain LT2 / SGSC1412 / ATCC 700720) GN=udp PE=1 SV=2	0.0654064	0.0689075	0.0843577	0.0728906	0.010084	0.0326071	0.0527086	0.0680294	0.0702053	0.0558876	0.0173638	1.30423	0.195012	0.032241	0.0371687	0.0318099		0.0344893	0.00378918	0.617119	0.178384	0.0325942
P0A1B7	ATPE_SALTY	ATP synthase epsilon chain OS=Salmonella typhimurium (strain LT2 / SGSC1412 / ATCC 700720) GN=atpC PE=2 SV=2	0.022873	0.163733	0.122175	0.102927	0.0723756	0.0703653	0.018115	0.0533022	0.0637391	0.0513804	0.0232626	2.00324	0.228437	0.0339323	0.142849	0.0550412	0.0780309	0.0919737	0.045534	1.79005	0.17846	0.0327051
Q8ZL03	IBPB_SALTY	Small heat shock protein IbpB OS=Salmonella typhimurium (strain LT2 / SGSC1412 / ATCC 700720) GN=ibpB PE=3 SV=1			0.0565826	0.0565826		0.0190935	0.0533418			0.0362176	0.0242172	1.56229			0.0674754	0.0545803	0.0578831	0.0599796	0.00669831	1.65609	0.181373	0.032816
P0A1V4	KAD_SALTY	Adenylate kinase OS=Salmonella typhimurium (strain LT2 / SGSC1412 / ATCC 700720) GN=adk PE=3 SV=1	0.0867792	0.106993	0.0967736	0.0968487	0.0101073	0.0674772	0.0963285	0.0651225	0.082777	0.0779263	0.0145521	1.24282	0.114108	0.0272727	0.0516763	0.0571065	0.0759246	0.0615691	0.0127253	0.790095	0.182704	0.0329268
P64036	EFP_SALTY	Elongation factor P OS=Salmonella typhimurium (strain LT2 / SGSC1412 / ATCC 700720) GN=efp PE=3 SV=2	0.111221	0.216889	0.158125	0.162079	0.0529451		0.0957981	0.0713358	0.0870165	0.0847168	0.0123922	1.91318	0.069376	0.0232558	0.0296223	0.0640553	0.0804115	0.0580297	0.0259252	0.684985	0.182981	0.0330377
P58661	AAT_SALTY	Aspartate aminotransferase OS=Salmonella typhimurium (strain LT2 / SGSC1412 / ATCC 700720) GN=aspC PE=3 SV=1	0.0637792	0.0607801	0.0675056	0.0640216	0.00336929	0.0734858	0.078756	0.13325	0.125636	0.102782	0.0310167	0.622888	0.0892936	0.0254757	0.0872194		0.0158449	0.0515322	0.0504694	0.501374	0.183616	0.0331486
Q8ZKQ1	LSRB_SALTY	Autoinducer 2-binding protein LsrB OS=Salmonella typhimurium (strain LT2 / SGSC1412 / ATCC 700720) GN=lsrB PE=1 SV=1	0.0326932	0.0731393	0.0481893	0.0513406	0.0204064	0.0152884	0.0379142	0.0464356	0.0296887	0.0323317	0.0132607	1.58793	0.191707	0.0320296	0.0432698	0.0416486	0.0489993	0.0446392	0.00386193	1.38066	0.187473	0.0332594
Q7CR42	Q7CR42_SALTY	Putative thiol-alkyl hydroperoxide reductase OS=Salmonella typhimurium (strain LT2 / SGSC1412 / ATCC 700720) GN=STM0402 PE=4 SV=1	0.842769	0.772045	0.955559	0.856791	0.0925569	0.541542	0.600183	0.793165	0.768272	0.67579	0.12392	1.26784	0.0888639	0.0252643	0.682564	0.507578	0.278904	0.489682	0.202424	0.724606	0.188296	0.0333703
H9L410	H9L410_SALTY	Chorismate mutase OS=Salmonella typhimurium (strain LT2 / SGSC1412 / ATCC 700720) GN=STM1269 PE=4 SV=1	0.140386	0.136738	0.0618184	0.112981	0.0443454	0.110304	0.0263914		0.0566752	0.0644569	0.0424941	1.75281	0.243008	0.0345666		0.116012	0.118667	0.11734	0.00187738	1.82044	0.193745	0.0334812
P65933	PYRH_SALTY	Uridylate kinase OS=Salmonella typhimurium (strain LT2 / SGSC1412 / ATCC 700720) GN=pyrH PE=1 SV=1	0.0561259		0.0562515	0.0561887	8.88387e-05		0.10374		0.0657091	0.0847243	0.0268916	0.663194	0.272241	0.0352008		0.045008	0.0505727	0.0477904	0.00393485	0.564069	0.194563	0.033592
Q7CR26	Q7CR26_SALTY	Cytochrome o ubiquinol oxidase subunit II OS=Salmonella typhimurium (strain LT2 / SGSC1412 / ATCC 700720) GN=cyoA PE=4 SV=1	0.0705019	0.09261	0.0988426	0.0873182	0.014893	0.0995004	0.063915	0.105974	0.0944709	0.0909652	0.0186381	0.959907	0.792859	0.0470402	0.0556891	0.0845944	0.074126	0.0714699	0.0146345	0.785683	0.196805	0.0337029
Q8ZQJ0	Q8ZQJ0_SALTY	Putative lipoprotein OS=Salmonella typhimurium (strain LT2 / SGSC1412 / ATCC 700720) GN=ybjP PE=4 SV=1	0.0292917	0.0293245	0.0328768	0.0304976	0.00206044	0.0283186			0.0206975	0.024508	0.00538893	1.2444	0.160618	0.0303383	0.0278573	0.0407764	0.0528365	0.0404901	0.0124921	1.65212	0.199175	0.0338137
P0A7P2	RL33_SALTY	50S ribosomal protein L33 OS=Salmonella typhimurium (strain LT2 / SGSC1412 / ATCC 700720) GN=rpmG PE=3 SV=2	0.0702964		0.0564373	0.0633669	0.00979986	0.11764	0.101569		0.14748	0.122229	0.0232971	0.518426	0.0475216	0.0211416	0.129347	0.0392964	0.0565914	0.0750782	0.0477869	0.614239	0.199299	0.0339246
Q8ZP65	TPX_SALTY	Probable thiol peroxidase OS=Salmonella typhimurium (strain LT2 / SGSC1412 / ATCC 700720) GN=tpx PE=3 SV=1	0.561095	0.5335	0.343202	0.479266	0.118639	0.376754	0.218946	0.21751	0.380464	0.298418	0.0926103	1.60602	0.0714497	0.0233615	0.328569	0.38635	0.461184	0.392034	0.06649	1.31371	0.200468	0.0340355
Q8ZNZ7	Q8ZNZ7_SALTY	Putative IclR family transcriptional repressor OS=Salmonella typhimurium (strain LT2 / SGSC1412 / ATCC 700720) GN=kdgR PE=4 SV=1	0.0452465	0.056281	0.0454113	0.0489796	0.00632372	0.0147272	0.0409115	0.0552502	0.0465981	0.0393718	0.0174554	1.24403	0.413173	0.0394292	0.0241204	0.0159666	0.0301705	0.0234192	0.0071279	0.594822	0.202688	0.0341463
Q8ZQE3	Q8ZQE3_SALTY	ATP-binding subunit of serine protease OS=Salmonella typhimurium (strain LT2 / SGSC1412 / ATCC 700720) GN=clpA PE=3 SV=1							0.0322832	0.0321824	0.0659471	0.0434709	0.0194651				0.0183319		0.0218677	0.0200998	0.00250016	0.462374	0.206995	0.0342572
Q93DX3	Q93DX3_SALTY	Putative LysR family transcriptional regulator OS=Salmonella typhimurium (strain LT2 / SGSC1412 / ATCC 700720) GN=STM3120 PE=4 SV=1	0.389436	0.416837	0.277625	0.361299	0.0737475	0.215822	0.117601	0.132851	0.226109	0.173096	0.055783	2.08728	0.0116934	0.0130021	0.0659504	0.162491	0.116227	0.11489	0.0482844	0.663734	0.209324	0.0343681
Q7CPH8	SECB_SALTY	Protein-export protein SecB OS=Salmonella typhimurium (strain LT2 / SGSC1412 / ATCC 700720) GN=secB PE=3 SV=1	0.123702	0.136043	0.113321	0.124356	0.0113749	0.243739	0.0828604	0.135701	0.0928605	0.13879	0.073624	0.895997	0.755637	0.0465116	0.0958806	0.0896692	0.0267414	0.0707637	0.0382507	0.509862	0.210009	0.0344789
P61179	RL22_SALTY	50S ribosomal protein L22 OS=Salmonella typhimurium (strain LT2 / SGSC1412 / ATCC 700720) GN=rplV PE=3 SV=1	0.320217	0.31545	0.347623	0.327763	0.0173634	0.465318	0.533285	0.51966	0.458965	0.494307	0.0376452	0.663077	0.000917852	0.00433404	0.761321	0.538691	0.494659	0.598224	0.142952	1.21023	0.211503	0.0345898
Q8ZPG8	Q8ZPG8_SALTY	Putative hydrolase OS=Salmonella typhimurium (strain LT2 / SGSC1412 / ATCC 700720) GN=STM1540 PE=4 SV=1	0.137868	0.126243	0.172594	0.145568	0.0241162	0.070493	0.0956817	0.103062	0.118554	0.0969475	0.020047	1.50152	0.032834	0.0183932	0.118344	0.107921	0.116222	0.114162	0.00550805	1.17757	0.215864	0.0347007
Q8ZLR9	Q8ZLR9_SALTY	Lipopolysaccharide export system protein LptA OS=Salmonella typhimurium (strain LT2 / SGSC1412 / ATCC 700720) GN=yhbN PE=3 SV=1			0.0361576	0.0361576				0.041893	0.0265474	0.0342202	0.010851	1.05662			0.109928	0.0443048	0.0667368	0.0736567	0.0333545	2.15244	0.219849	0.0348115
Q8ZKY4	YIDC_SALTY	Membrane protein insertase YidC OS=Salmonella typhimurium (strain LT2 / SGSC1412 / ATCC 700720) GN=yidC PE=3 SV=1	0.0724917	0.07993	0.0977371	0.0833862	0.0129727	0.13312	0.0854385	0.096426	0.0849973	0.0999955	0.022707	0.8339	0.313424	0.0369979	0.130626	0.115759	0.113185	0.119857	0.00941453	1.19862	0.220288	0.0349224
Q8ZPT1	Q8ZPT1_SALTY	Putative DNA/RNA non-specific endonuclease OS=Salmonella typhimurium (strain LT2 / SGSC1412 / ATCC 700720) GN=STM1330 PE=4 SV=1	0.0396014	0.0636522	0.0950106	0.066088	0.0277848	0.0451537	0.0251349	0.0442565		0.0381817	0.0113078	1.73088	0.182406	0.0312896	0.0734093	0.0533444	0.039047	0.0552669	0.0172616	1.44747	0.224866	0.0350333
Q8ZRC0	CLPX_SALTY	ATP-dependent Clp protease ATP-binding subunit ClpX OS=Salmonella typhimurium (strain LT2 / SGSC1412 / ATCC 700720) GN=clpX PE=3 SV=1	0.0457377	0.0331208	0.0418869	0.0402485	0.00646604	0.124187	0.0491392	0.0670124	0.0585236	0.0747156	0.0337793	0.538689	0.149098	0.0299154	0.0302252	0.0624527	0.0424362	0.045038	0.0162705	0.602792	0.225519	0.0351441
O33921	AGP_SALTY	Glucose-1-phosphatase OS=Salmonella typhimurium (strain LT2 / SGSC1412 / ATCC 700720) GN=agp PE=3 SV=2	0.0610744	0.0644313	0.0698588	0.0651215	0.0044327		0.0777272	0.0967038	0.0625374	0.0789895	0.0171181	0.824433	0.245902	0.0346723	0.0563222	0.0781256	0.0386689	0.0577056	0.0197647	0.730548	0.231378	0.035255
Q8ZN40	ISCS_SALTY	Cysteine desulfurase IscS OS=Salmonella typhimurium (strain LT2 / SGSC1412 / ATCC 700720) GN=iscS PE=3 SV=1	0.0251267	0.0399879	0.0255406	0.0302184	0.00846315		0.0309199	0.0246742	0.0156282	0.0237408	0.00768844	1.27285	0.382026	0.0383721	0.0176989	0.0115763		0.0146376	0.00432932	0.61656	0.236467	0.0353659
P58671	ISPG_SALTY	4-hydroxy-3-methylbut-2-en-1-yl diphosphate synthase (flavodoxin) OS=Salmonella typhimurium (strain LT2 / SGSC1412 / ATCC 700720) GN=ispG PE=3 SV=1	0.0321151		0.0135714	0.0228433	0.0131124		0.17649	0.0305585	0.0304027	0.0791503	0.0842986	0.288606	0.438674	0.0401691	0.00978661	0.0149357	0.00959228	0.0114382	0.00303048	0.144512	0.236784	0.0354767
Q8ZKP7	TPIS_SALTY	Triosephosphate isomerase OS=Salmonella typhimurium (strain LT2 / SGSC1412 / ATCC 700720) GN=tpiA PE=3 SV=1	0.0745299	0.140748	0.0771621	0.0974801	0.0374944	0.0623447	0.0285694		0.0221611	0.0376917	0.0215892	2.58625	0.0748828	0.0236786		0.016342	0.0115772	0.0139596	0.00336924	0.370362	0.238926	0.0355876
Q7CQ71	RL25_SALTY	50S ribosomal protein L25 OS=Salmonella typhimurium (strain LT2 / SGSC1412 / ATCC 700720) GN=rplY PE=3 SV=1		0.0881338		0.0881338		0.0441408	0.0395011	0.0874184	0.0671792	0.0595599	0.022168	1.47975				0.0236544	0.0458676	0.034761	0.0157071	0.583631	0.239552	0.0356984
Q7CQV7	Q7CQV7_SALTY	Putative periplasmic protein OS=Salmonella typhimurium (strain LT2 / SGSC1412 / ATCC 700720) GN=ybiS PE=4 SV=1	0.0541161	0.0470918	0.0582628	0.0531569	0.00564694	0.0340535	0.0492601	0.0436208		0.0423115	0.00768739	1.25632	0.120258	0.027907	0.0614049	0.0444753	0.0488566	0.0515789	0.00878702	1.21903	0.241159	0.0358093
Q8ZJV7	DEOD_SALTY	Purine nucleoside phosphorylase DeoD-type OS=Salmonella typhimurium (strain LT2 / SGSC1412 / ATCC 700720) GN=deoD PE=3 SV=1	0.0568743	0.0432419	0.042627	0.0475811	0.00805404	0.113904	0.0566504	0.0481756	0.0526369	0.0678417	0.0309025	0.701355	0.327868	0.0374207	0.0475138	0.0231099		0.0353119	0.0172562	0.520504	0.25254	0.0359202
P69226	IF1_SALTY	Translation initiation factor IF-1 OS=Salmonella typhimurium (strain LT2 / SGSC1412 / ATCC 700720) GN=infA PE=3 SV=2	0.136565	0.131498	0.0900605	0.119374	0.0255127		0.0460236		0.0532441	0.0496339	0.00510569	2.4051	0.0359611	0.0192389	0.0703658	0.184756	0.0875153	0.114212	0.0616916	2.3011	0.255463	0.036031
P0A295	RHO_SALTY	Transcription termination factor Rho OS=Salmonella typhimurium (strain LT2 / SGSC1412 / ATCC 700720) GN=rho PE=3 SV=1	0.0993041	0.134584	0.146218	0.126702	0.0244301	0.31315	0.177667	0.174692	0.156642	0.205538	0.0723406	0.616442	0.135928	0.0289641	0.173177	0.139629	0.135326	0.149377	0.0207232	0.726762	0.25744	0.0361419
P0A1G7	DNAJ_SALTY	Chaperone protein DnaJ OS=Salmonella typhimurium (strain LT2 / SGSC1412 / ATCC 700720) GN=dnaJ PE=3 SV=2	0.036397	0.0284537	0.0282421	0.0310309	0.00464839	0.0599722	0.0723478	0.0699136	0.0606767	0.0657276	0.00632417	0.472114	0.000507134	0.00317125	0.0656619	0.0450148		0.0553384	0.0145997	0.841936	0.258975	0.0362528
P0A1R8	DBHB_SALTY	DNA-binding protein HU-beta OS=Salmonella typhimurium (strain LT2 / SGSC1412 / ATCC 700720) GN=hupB PE=3 SV=1	0.213721	0.0815035	0.0626741	0.1193	0.0823116	0.0200196	0.0146223		0.043072	0.0259046	0.0151103	4.60534	0.125386	0.0282241	0.0207666	0.160223	0.0629093	0.0812996	0.0715239	3.13842	0.259596	0.0363636
Q8ZQL1	Q8ZQL1_SALTY	D-alanyl-D-alanine carboxypeptidase penicillin-binding protein 6a OS=Salmonella typhimurium (strain LT2 / SGSC1412 / ATCC 700720) GN=dacC PE=3 SV=1	0.0892501	0.0765232	0.0685986	0.078124	0.0104184	0.0455595	0.064976	0.0709599	0.061555	0.0607626	0.0108551	1.28572	0.0866343	0.0249471	0.0815036	0.0661325	0.0644837	0.0707066	0.00938677	1.16365	0.261647	0.0364745
Q7CQR0	Q7CQR0_SALTY	Uncharacterized protein OS=Salmonella typhimurium (strain LT2 / SGSC1412 / ATCC 700720) GN=ycfF PE=4 SV=1	0.123878	0.0984077	0.0467636	0.089683	0.0392905	0.0428746	0.0161205			0.0294976	0.018918	3.04035	0.146923	0.0295983		0.129801	0.0537827	0.0917916	0.0537528	3.11183	0.262149	0.0365854
Q7CPF1	IBPA_SALTY	Small heat shock protein IbpA OS=Salmonella typhimurium (strain LT2 / SGSC1412 / ATCC 700720) GN=ibpA PE=3 SV=1		0.0475043	0.0606597	0.054082	0.00930234	0.10175	0.0539956			0.0778726	0.0337672	0.694493	0.438117	0.0399577	0.0771231	0.149505	0.160744	0.129124	0.0453834	1.65814	0.272452	0.0366962
Q8ZNV7	ZNUC_SALTY	Zinc import ATP-binding protein ZnuC OS=Salmonella typhimurium (strain LT2 / SGSC1412 / ATCC 700720) GN=znuC PE=2 SV=2			0.0213213	0.0213213			0.0327184	0.0884154	0.026224	0.0491193	0.034186	0.434073				0.0121208	0.0185447	0.0153328	0.00454237	0.312154	0.278475	0.0368071
P0A2C9	FABG_SALTY	3-oxoacyl-[acyl-carrier-protein] reductase FabG OS=Salmonella typhimurium (strain LT2 / SGSC1412 / ATCC 700720) GN=fabG PE=1 SV=1	0.158967		0.0268679	0.0929174	0.093408	0.0693111			0.0218687	0.0455899	0.0335468	2.03811	0.569578	0.043129		0.0868411	0.0756003	0.0812207	0.00794846	1.78155	0.281339	0.036918
H9L4A3	H9L4A3_SALTY	Putative dioxygenase for synthesis of lipid OS=Salmonella typhimurium (strain LT2 / SGSC1412 / ATCC 700720) GN=lpxO PE=4 SV=1	0.0486179		0.0450068	0.0468124	0.00255343		0.0352804	0.055366	0.0514229	0.0473564	0.0106424	0.988511	0.950342	0.0491543	0.0410491	0.0308218		0.0359355	0.00723181	0.75883	0.285143	0.0370288
Q8ZJV8	DEOC_SALTY	Deoxyribose-phosphate aldolase OS=Salmonella typhimurium (strain LT2 / SGSC1412 / ATCC 700720) GN=deoC PE=3 SV=2	0.15884	0.158317	0.18164	0.166266	0.0133174	0.0800417	0.224112	0.107385	0.0979052	0.127361	0.0654893	1.30547	0.367372	0.0379493	0.0740299	0.0880393	0.0816857	0.0812516	0.00701474	0.637963	0.289057	0.0371397
Q8ZML1	Q8ZML1_SALTY	Glycine/betaine/proline transport protein OS=Salmonella typhimurium (strain LT2 / SGSC1412 / ATCC 700720) GN=proX PE=4 SV=1			0.00827931	0.00827931			0.0507075	0.0619548	0.0129746	0.041879	0.0256558	0.197696				0.00850371	0.0240453	0.0162745	0.0109896	0.388609	0.290101	0.0372506
Q7CR49	Q7CR49_SALTY	Putative periplasmic protein OS=Salmonella typhimurium (strain LT2 / SGSC1412 / ATCC 700720) GN=yahO PE=1 SV=1	0.1647	0.152359	0.147255	0.154772	0.00896941		0.0321949		0.0690095	0.0506022	0.0260318	3.05859	0.00643448	0.010148	0.0775144	0.0618332	0.0678706	0.0690727	0.00790943	1.36501	0.304124	0.0373614
P0AA28	THIO_SALTY	Thioredoxin-1 OS=Salmonella typhimurium (strain LT2 / SGSC1412 / ATCC 700720) GN=trxA PE=3 SV=2	0.211633	0.115235	0.0856585	0.137509	0.0658745		0.0746466	0.0609378	0.0820268	0.0725371	0.0107016	1.89571	0.167034	0.0306554	0.0482964	0.130022	0.146965	0.108428	0.0527601	1.4948	0.312484	0.0374723
Q8ZQ71	Q8ZQ71_SALTY	Paraquat-inducible protein B OS=Salmonella typhimurium (strain LT2 / SGSC1412 / ATCC 700720) GN=pqiB PE=4 SV=1	0.0361331		0.0180249	0.027079	0.0128044	0.00714924	0.00622217		0.0116753	0.00834889	0.00291778	3.24342	0.0775458	0.0238901	0.0207193	0.0172501	0.224759	0.087576	0.118816	10.4895	0.31254	0.0375831
Q8ZQP0	YBHG_SALTY	UPF0194 membrane protein YbhG OS=Salmonella typhimurium (strain LT2 / SGSC1412 / ATCC 700720) GN=ybhG PE=3 SV=1			0.0346241	0.0346241			0.0324973		0.0114282	0.0219627	0.0148981	1.57649			0.0478129	0.0315745		0.0396937	0.0114823	1.80732	0.314062	0.037694
P66313	RL6_SALTY	50S ribosomal protein L6 OS=Salmonella typhimurium (strain LT2 / SGSC1412 / ATCC 700720) GN=rplF PE=3 SV=2	0.252774	0.199015	0.221655	0.224482	0.0269908	0.395154	0.403301	0.400952	0.409195	0.40215	0.00581172	0.558203	4.49608e-05	0.000845666	0.447726	0.348371	0.249547	0.348548	0.0990894	0.86671	0.314775	0.0378049
O52324	ARNC_SALTY	Undecaprenyl-phosphate 4-deoxy-4-formamido-L-arabinose transferase OS=Salmonella typhimurium (strain LT2 / SGSC1412 / ATCC 700720) GN=arnC PE=2 SV=1	0.0422627	0.0320591	0.041217	0.0385129	0.0056136		0.0426332	0.0449274	0.0445117	0.0440241	0.00122232	0.874814	0.171945	0.0308668	0.0456868		0.0138025	0.0297447	0.0225456	0.675645	0.316868	0.0379157
P67537	YBED_SALTY	UPF0250 protein YbeD OS=Salmonella typhimurium (strain LT2 / SGSC1412 / ATCC 700720) GN=ybeD PE=3 SV=1			0.0347975	0.0347975				0.0265993	0.0519448	0.0392721	0.017922	0.886061				0.0526822	0.0609318	0.056807	0.00583335	1.4465	0.318845	0.0380266
Q8ZP45	Q8ZP45_SALTY	Aldehyde-alcohol dehydrogenase OS=Salmonella typhimurium (strain LT2 / SGSC1412 / ATCC 700720) GN=adhE PE=3 SV=1	0.127715	0.406792	0.159877	0.231461	0.15269	0.389821	0.239735	0.255322	0.276031	0.290227	0.0680398	0.797518	0.515505	0.0420719	0.0812772	0.391968	0.0846843	0.185977	0.178402	0.640797	0.323016	0.0381375
Q8ZLQ6	NANA_SALTY	N-acetylneuraminate lyase OS=Salmonella typhimurium (strain LT2 / SGSC1412 / ATCC 700720) GN=nanA PE=3 SV=1	0.0476723			0.0476723		0.0750917	0.0244324		0.0450549	0.048193	0.025475	0.989196				0.026812	0.0253144	0.0260632	0.00105896	0.540809	0.328245	0.0382483
Q8ZR02	Q8ZR02_SALTY	D-alanyl-D-alanine carboxypeptidase, penicillin-binding protein 5 OS=Salmonella typhimurium (strain LT2 / SGSC1412 / ATCC 700720) GN=dacA PE=3 SV=1	0.0567139		0.0307921	0.043753	0.0183295	0.051956	0.031157	0.0691045	0.0372835	0.0473753	0.0169117	0.923542	0.820616	0.0473573	0.0291045	0.0654089	0.150873	0.0817953	0.062516	1.72654	0.328664	0.0383592
Q8ZK70	Q8ZK70_SALTY	Putative periplasmic protein OS=Salmonella typhimurium (strain LT2 / SGSC1412 / ATCC 700720) GN=ytfN PE=4 SV=1		0.0391859	0.0195021	0.029344	0.0139185		0.0153434	0.0363558	0.0713947	0.0410313	0.0283166	0.715161	0.637112	0.0446089	0.0289076	0.0213059	0.0173419	0.0225185	0.00587744	0.548812	0.329711	0.0384701
Q7CP66	TYPH_SALTY	Thymidine phosphorylase OS=Salmonella typhimurium (strain LT2 / SGSC1412 / ATCC 700720) GN=deoA PE=3 SV=1	0.0336438	0.344813	0.0405845	0.13968	0.177684		0.088017	0.0352461	0.0315035	0.0515889	0.0316032	2.70757	0.445471	0.0403805	0.0357784	0.0273583	0.0312746	0.0314705	0.00421346	0.610024	0.335828	0.0385809
P0A261	TSX_SALTY	Nucleoside-specific channel-forming protein tsx OS=Salmonella typhimurium (strain LT2 / SGSC1412 / ATCC 700720) GN=tsx PE=3 SV=1	0.0500196	0.0723372	0.0736893	0.0653487	0.0132926		0.0491438	0.0517242	0.0478787	0.0495822	0.00195986	1.31799	0.111903	0.0270613		0.0442126	0.0494973	0.046855	0.00373689	0.944995	0.347156	0.0386918
Q7CQP4	Q7CQP4_SALTY	Putative oxidoreductase OS=Salmonella typhimurium (strain LT2 / SGSC1412 / ATCC 700720) GN=ydjA PE=4 SV=1	0.0355149	0.0259482	0.032032	0.031165	0.00484192		0.0238178		0.0501055	0.0369616	0.0185882	0.843172	0.617466	0.0439746	0.0223324		0.0193843	0.0208583	0.00208465	0.564324	0.347559	0.0388027
P16657	FABI_SALTY	Enoyl-[acyl-carrier-protein] reductase [NADH] FabI OS=Salmonella typhimurium (strain LT2 / SGSC1412 / ATCC 700720) GN=fabI PE=1 SV=3	0.191837	0.0840624	0.132164	0.136021	0.0539907	0.226845	0.0742882	0.0580479	0.122793	0.120493	0.0760488	1.12887	0.777262	0.0469345		0.0405836	0.0781236	0.0593536	0.0265448	0.492588	0.352635	0.0389135
P66692	RPIA_SALTY	Ribose-5-phosphate isomerase A OS=Salmonella typhimurium (strain LT2 / SGSC1412 / ATCC 700720) GN=rpiA PE=3 SV=1	0.0487065	0.0409962	0.0384593	0.0427206	0.00533681		0.0209278	0.0407222	0.0634461	0.0416987	0.021276	1.02451	0.939561	0.0489429		0.063144	0.0555252	0.0593346	0.00538729	1.42294	0.353669	0.0390244
Q7CPV8	Q7CPV8_SALTY	Putative lipoprotein OS=Salmonella typhimurium (strain LT2 / SGSC1412 / ATCC 700720) GN=ygdI PE=1 SV=1	0.134497	0.124356	0.132346	0.130399	0.00534316	0.10049	0.0695089			0.0849997	0.0219072	1.53412	0.0338742	0.0186047	0.124007	0.12343	0.0795664	0.109001	0.0254931	1.28237	0.359422	0.0391353
P0A2B3	RS7_SALTY	30S ribosomal protein S7 OS=Salmonella typhimurium (strain LT2 / SGSC1412 / ATCC 700720) GN=rpsG PE=1 SV=2	0.308919	0.526519	0.521254	0.452231	0.12414	0.663977	0.595241	0.502066	0.496498	0.564445	0.0803386	0.801195	0.202412	0.0324524	0.648202	0.587908	0.607313	0.614474	0.030778	1.08863	0.361201	0.0392461
Q8ZP75	Q8ZP75_SALTY	Putative cytoplasmic protein OS=Salmonella typhimurium (strain LT2 / SGSC1412 / ATCC 700720) GN=STM1672 PE=4 SV=1	0.106724	0.145293	0.126544	0.126187	0.0192873		0.0678379	0.0783811	0.0957761	0.0806651	0.0141085	1.56433	0.0299481	0.0178647	0.0886014	0.0875543	0.091145	0.0891002	0.00184658	1.10457	0.362549	0.039357
Q04873	UDG_SALTY	UDP-glucose 6-dehydrogenase OS=Salmonella typhimurium (strain LT2 / SGSC1412 / ATCC 700720) GN=udg PE=3 SV=1	0.0393574		0.0335716	0.0364645	0.00409118		0.0389381	0.0346333	0.0257053	0.0330922	0.00674963	1.10191	0.581411	0.0433404	0.0322875	0.0312159	0.0135996	0.025701	0.0104938	0.776647	0.362864	0.0394678
Q7CPE2	ATPB_SALTY	ATP synthase subunit beta OS=Salmonella typhimurium (strain LT2 / SGSC1412 / ATCC 700720) GN=atpD PE=3 SV=1	0.584292	0.607495	0.634498	0.608762	0.0251267	0.967149	0.652697	0.756688	0.721192	0.774431	0.135534	0.786076	0.0965155	0.0257928	0.821678	0.582651	0.613458	0.672596	0.130025	0.868503	0.363296	0.0395787
Q93IN1	BCSB_SALTY	Cyclic di-GMP-binding protein OS=Salmonella typhimurium (strain LT2 / SGSC1412 / ATCC 700720) GN=bcsB PE=3 SV=1			0.00972061	0.00972061			0.0185126	0.0198079		0.0191603	0.000915889	0.507332			0.0079105		0.018313	0.0131118	0.00735571	0.684321	0.367782	0.0396896
P57048	TATB_SALTY	Sec-independent protein translocase protein TatB OS=Salmonella typhimurium (strain LT2 / SGSC1412 / ATCC 700720) GN=tatB PE=3 SV=2	0.0427873		0.0535344	0.0481609	0.00759936	0.0310968	0.0655019	0.0595736	0.032147	0.0470798	0.0180177	1.02296	0.941778	0.0490486	0.123939	0.0611518	0.0309716	0.072021	0.0474274	1.52976	0.368938	0.0398004
P41031	CYSP_SALTY	Thiosulfate-binding protein OS=Salmonella typhimurium (strain LT2 / SGSC1412 / ATCC 700720) GN=cysP PE=3 SV=2	0.0157193		0.0418135	0.0287664	0.0184514		0.0657717		0.00581949	0.0357956	0.0423926	0.803629	0.849692	0.0476744	0.0103789	0.0119213	0.0147714	0.0123572	0.00222845	0.345215	0.372357	0.0399113
Q8ZLQ5	Q8ZLQ5_SALTY	Stringent starvation protein A OS=Salmonella typhimurium (strain LT2 / SGSC1412 / ATCC 700720) GN=sspA PE=3 SV=1	0.168533	0.175909	0.166212	0.170218	0.00506296	0.0642195	0.146682	0.145029	0.065008	0.105235	0.0469111	1.61751	0.0670066	0.0227273	0.0382001	0.0682938	0.113138	0.0732105	0.03771	0.695688	0.379014	0.0400222
P25468	PYRD_SALTY	Dihydroorotate dehydrogenase (quinone) OS=Salmonella typhimurium (strain LT2 / SGSC1412 / ATCC 700720) GN=pyrD PE=3 SV=2							0.0167026	0.152318		0.0845102	0.0958944				0.0134549		0.00680351	0.0101292	0.00470323	0.119858	0.387565	0.040133
Q7CPN8	Q7CPN8_SALTY	Sugar specific PTS family enzyme IIA OS=Salmonella typhimurium (strain LT2 / SGSC1412 / ATCC 700720) GN=ptsN PE=4 SV=1			0.0240946	0.0240946			0.0316223		0.0112089	0.0214156	0.0144345	1.1251			0.0653026		0.025825	0.0455638	0.0279149	2.12759	0.390697	0.0402439
P0A2A7	RL30_SALTY	50S ribosomal protein L30 OS=Salmonella typhimurium (strain LT2 / SGSC1412 / ATCC 700720) GN=rpmD PE=3 SV=2	0.0635336		0.0612641	0.0623988	0.00160479	0.0890548	0.0861274	0.051005	0.104329	0.082629	0.0225425	0.755169	0.2979	0.0364693	0.0513512	0.12088	0.157143	0.109792	0.0537607	1.32873	0.394849	0.0403548
P58537	SUHB_SALTY	Inositol-1-monophosphatase OS=Salmonella typhimurium (strain LT2 / SGSC1412 / ATCC 700720) GN=suhB PE=3 SV=1	0.0352994		0.0327877	0.0340436	0.00177601		0.0415628		0.0260228	0.0337928	0.0109884	1.00742	0.977478	0.0497886	0.0250017	0.0271433	0.0309415	0.0276955	0.00300814	0.819569	0.398594	0.0404656
P67270	GCH1L_SALTY	GTP cyclohydrolase 1 type 2 homolog OS=Salmonella typhimurium (strain LT2 / SGSC1412 / ATCC 700720) GN=ybgI PE=3 SV=1	0.0765881	0.119039	0.113848	0.103158	0.0231565		0.0726081		0.0482266	0.0604174	0.0172403	1.70743	0.116121	0.0275899	0.147204	0.060261	0.0768119	0.094759	0.0461665	1.56841	0.405762	0.0405765
P0A2M5	UPP_SALTY	Uracil phosphoribosyltransferase OS=Salmonella typhimurium (strain LT2 / SGSC1412 / ATCC 700720) GN=upp PE=3 SV=1	0.107183	0.114464	0.113787	0.111811	0.00402243	0.103793	0.0726547	0.0819072	0.108452	0.0917018	0.0171804	1.21929	0.109608	0.0267442	0.0644809	0.0757766	0.099686	0.0799812	0.0179752	0.872188	0.420731	0.0407982
P67038	SYFA_SALTY	Phenylalanine--tRNA ligase alpha subunit OS=Salmonella typhimurium (strain LT2 / SGSC1412 / ATCC 700720) GN=pheS PE=3 SV=1	0.0413372	0.0543179	0.0489825	0.0482125	0.0065245	0.0726236	0.0735807	0.0455225	0.0487149	0.0601104	0.0150631	0.802066	0.263701	0.0349894	0.0808794	0.0459125	0.08901	0.071934	0.022899	1.1967	0.44312	0.0409091
Q8ZKB1	PSD_SALTY	Phosphatidylserine decarboxylase proenzyme OS=Salmonella typhimurium (strain LT2 / SGSC1412 / ATCC 700720) GN=psd PE=3 SV=1	0.746356			0.746356				0.0256858	0.03807	0.0318779	0.00875694	23.413				0.0233508	0.0280105	0.0256806	0.00329492	0.805593	0.447785	0.04102
Q8ZLT0	ASSY_SALTY	Argininosuccinate synthase OS=Salmonella typhimurium (strain LT2 / SGSC1412 / ATCC 700720) GN=argG PE=3 SV=3			0.0109433	0.0109433			0.0184198	0.0321247		0.0252723	0.00969084	0.433016			0.0227686		0.0114993	0.017134	0.00796859	0.677975	0.455802	0.0411308
P0CW86	SODC1_SALTY	Superoxide dismutase [Cu-Zn] 1 OS=Salmonella typhimurium (strain LT2 / SGSC1412 / ATCC 700720) GN=sodC1 PE=1 SV=1	1.01801	2.41321	2.02583	1.81902	0.720221	0.458051	0.592467	0.866032	1.03444	0.737747	0.260653	2.46564	0.0361878	0.0193446	0.567031	1.17691	0.98546	0.909801	0.311901	1.23322	0.461036	0.0412417
Q7CPL5	RL14_SALTY	50S ribosomal protein L14 OS=Salmonella typhimurium (strain LT2 / SGSC1412 / ATCC 700720) GN=rplN PE=3 SV=1	0.190113	0.174457	0.228513	0.197694	0.0278141	0.443656	0.421427	0.447469	0.414258	0.431703	0.0163438	0.457941	3.18813e-05	0.000422833	0.468162	0.344571	0.407534	0.406756	0.0617993	0.942213	0.462653	0.0413525
P0A297	RL10_SALTY	50S ribosomal protein L10 OS=Salmonella typhimurium (strain LT2 / SGSC1412 / ATCC 700720) GN=rplJ PE=3 SV=2	0.465259	0.20149	0.0555145	0.240755	0.207675	0.674799	0.124186	0.143527	0.43002	0.343133	0.261618	0.701637	0.602762	0.0436575	0.0705431	0.830099	0.724932	0.541858	0.411544	1.57915	0.465981	0.0414634
Q8ZLE9	Q8ZLE9_SALTY	Signal recognition particle receptor FtsY OS=Salmonella typhimurium (strain LT2 / SGSC1412 / ATCC 700720) GN=ftsY PE=3 SV=1			0.0306	0.0306			0.024991	0.0273507	0.0330984	0.02848	0.00417003	1.07444			0.0195685	0.0185064	0.0340129	0.0240293	0.00866237	0.843723	0.467566	0.0415743
P0A2A9	RS16_SALTY	30S ribosomal protein S16 OS=Salmonella typhimurium (strain LT2 / SGSC1412 / ATCC 700720) GN=rpsP PE=3 SV=1	0.231861	0.208143	0.269963	0.236656	0.0311874	0.306038	0.339777	0.367695	0.300615	0.328531	0.0313344	0.720345	0.0120474	0.0133192	0.262484	0.374473	0.263693	0.300216	0.0643108	0.913815	0.469236	0.0416851
Q8ZP60	Q8ZP60_SALTY	Phage shock protein OS=Salmonella typhimurium (strain LT2 / SGSC1412 / ATCC 700720) GN=pspA PE=4 SV=1	0.0468253	0.0545241	0.0632691	0.0548728	0.00822744	0.0260738	0.0560503	0.0267897	0.0366063	0.03638	0.0139662	1.50832	0.0997552	0.0261099	0.053858	0.0435944	0.0340356	0.0438293	0.00991326	1.20476	0.470659	0.041796
Q8ZLQ2	Q8ZLQ2_SALTY	Putative periplasmic protein OS=Salmonella typhimurium (strain LT2 / SGSC1412 / ATCC 700720) GN=yhcB PE=4 SV=1	0.0837018	0.0880116	0.0942439	0.0886524	0.00530017	0.143591	0.112626	0.139856	0.124349	0.130105	0.0143249	0.681389	0.00542208	0.00951374	0.177455	0.118211	0.134322	0.143329	0.0306321	1.10164	0.473104	0.0419069
P66170	RL29_SALTY	50S ribosomal protein L29 OS=Salmonella typhimurium (strain LT2 / SGSC1412 / ATCC 700720) GN=rpmC PE=3 SV=1	0.12279	0.0851853	0.0571525	0.088376	0.032935	0.204874	0.0882146	0.089846	0.227442	0.152594	0.0739763	0.579157	0.226375	0.0337209		0.201962	0.190546	0.196254	0.00807261	1.28611	0.476156	0.0420177
Q8ZNU1	Q8ZNU1_SALTY	Putative cell wall-associated hydrolase OS=Salmonella typhimurium (strain LT2 / SGSC1412 / ATCC 700720) GN=STM1940 PE=4 SV=1	0.0620734	0.0784557	0.070004	0.0701777	0.00819253	0.0459339	0.0647433	0.0774105	0.0729501	0.0652595	0.0139109	1.07536	0.613276	0.0438689	0.0850844	0.0891556	0.0513696	0.0752032	0.0207406	1.15237	0.477746	0.0421286
Q9XCI8	DER_SALTY	GTPase Der OS=Salmonella typhimurium (strain LT2 / SGSC1412 / ATCC 700720) GN=der PE=1 SV=2	0.0233726	0.021915	0.028506	0.0245979	0.0034621		0.0326045	0.0225128		0.0275586	0.00713595	0.892565	0.562519	0.0427061	0.0337291	0.0303523		0.0320407	0.00238779	1.16264	0.488264	0.0422395
Q8ZRU3	MURG_SALTY	UDP-N-acetylglucosamine--N-acetylmuramyl-(pentapeptide) pyrophosphoryl-undecaprenol N-acetylglucosamine transferase OS=Salmonella typhimurium (strain LT2 / SGSC1412 / ATCC 700720) GN=murG PE=3 SV=3			0.0150642	0.0150642			0.00969832	0.0149817		0.01234	0.00373588	1.22076			0.0111621		0.00858315	0.00987261	0.00182357	0.80005	0.489607	0.0423503
Q8ZJX6	OPGB_SALTY	Phosphoglycerol transferase I OS=Salmonella typhimurium (strain LT2 / SGSC1412 / ATCC 700720) GN=mdoB PE=3 SV=2	0.0204522		0.0342556	0.0273539	0.00976045		0.0491112	0.0557531	0.044024	0.0496294	0.00588173	0.551163	0.0458795	0.0209302	0.0582864	0.039795	0.0312269	0.0431028	0.0138297	0.868492	0.49377	0.0424612
Q8ZLL4	Q8ZLL4_SALTY	Peptidyl-prolyl cis-trans isomerase OS=Salmonella typhimurium (strain LT2 / SGSC1412 / ATCC 700720) GN=slyD PE=4 SV=1	0.039593	0.168973	0.202681	0.137082	0.0860939	0.0210916	0.0417678	0.0503459		0.0377351	0.0150383	3.63275	0.120325	0.0280127		0.04143	0.00864338	0.0250367	0.0231836	0.663485	0.499519	0.0425721
Q8ZRW0	LPTD_SALTY	LPS-assembly protein LptD OS=Salmonella typhimurium (strain LT2 / SGSC1412 / ATCC 700720) GN=lptD PE=1 SV=1	0.0340364	0.0160028	0.0411764	0.0304052	0.0129737		0.0443084		0.0352643	0.0397864	0.00639514	0.764211	0.427178	0.0397463	0.0395005	0.038921	0.160565	0.0796621	0.0700645	2.00225	0.5015	0.0426829
P0DM80	PHOQ_SALTY	Virulence sensor histidine kinase PhoQ OS=Salmonella typhimurium (strain LT2 / SGSC1412 / ATCC 700720) GN=phoQ PE=1 SV=1	0.209133	0.0465647	0.279404	0.178367	0.11943		0.045244	0.0504298		0.0478369	0.00366697	3.72866	0.238906	0.0343552	0.0653924	0.0546453	0.0427842	0.054274	0.0113087	1.13456	0.51066	0.0427938
Q7CPX8	Q7CPX8_SALTY	Fur regulated Salmonella iron transporter OS=Salmonella typhimurium (strain LT2 / SGSC1412 / ATCC 700720) GN=sitA PE=3 SV=1	0.727775	1.14394	0.950395	0.940702	0.20825	1.20796	1.27252	1.35532	1.38119	1.30425	0.0791764	0.721258	0.0220459	0.0163848	1.30722	1.21743	1.62148	1.38204	0.212163	1.05964	0.520694	0.0429047
Q8ZQU0	Q8ZQU0_SALTY	Succinyl-CoA ligase [ADP-forming] subunit alpha OS=Salmonella typhimurium (strain LT2 / SGSC1412 / ATCC 700720) GN=sucD PE=3 SV=1	0.0503337	0.0327924	0.0718076	0.0516446	0.0195406	0.0341538	0.0570134			0.0455836	0.0161642	1.13296	0.743239	0.0464059	0.0515563	0.0309909	0.0266112	0.0363861	0.013319	0.798228	0.532655	0.0430155
P0A1H9	FABZ_SALTY	3-hydroxyacyl-[acyl-carrier-protein] dehydratase FabZ OS=Salmonella typhimurium (strain LT2 / SGSC1412 / ATCC 700720) GN=fabZ PE=3 SV=1	0.040704	0.0783106	0.0311185	0.0500443	0.0249441	0.0556242	0.0277366		0.0411292	0.0414966	0.0139474	1.20599	0.63176	0.0442918		0.04136	0.0246421	0.033001	0.0118213	0.79527	0.533802	0.0431264
Q8ZR40	Q8ZR40_SALTY	Outer membrane porin, receptor for ferric enterobactin (Enterochelin) and colicins B and D OS=Salmonella typhimurium (strain LT2 / SGSC1412 / ATCC 700720) GN=fepA PE=3 SV=1	0.03484	0.0585649	0.0427566	0.0453872	0.0120792	0.133253	0.120617	0.127915	0.111886	0.123418	0.00926951	0.367753	0.000193486	0.00211416	0.121313	0.0993356	0.131095	0.117248	0.0162654	0.95001	0.547997	0.0432373
P30752	LOLB_SALTY	Outer-membrane lipoprotein LolB OS=Salmonella typhimurium (strain LT2 / SGSC1412 / ATCC 700720) GN=lolB PE=3 SV=2			0.0150174	0.0150174		0.0187924	0.022459		0.0252998	0.0221838	0.0032624	0.676953			0.0247576		0.0230066	0.0238821	0.00123819	1.07656	0.548287	0.0433481
Q8ZQR3	Q8ZQR3_SALTY	Putative pectinesterase OS=Salmonella typhimurium (strain LT2 / SGSC1412 / ATCC 700720) GN=ybhC PE=3 SV=1			0.0210106	0.0210106			0.0290813	0.0475858	0.0243756	0.0336809	0.0122697	0.623812			0.0396246	0.0391601	0.0357328	0.0381725	0.00212558	1.13336	0.566008	0.043459
P66738	RRF_SALTY	Ribosome-recycling factor OS=Salmonella typhimurium (strain LT2 / SGSC1412 / ATCC 700720) GN=frr PE=3 SV=1	0.18823	0.246955	0.250896	0.228694	0.035098	0.18942	0.200424	0.184674	0.181537	0.189014	0.00826846	1.20993	0.074394	0.0235729	0.207347	0.0893637	0.209069	0.168593	0.0686201	0.891964	0.568849	0.0435698
Q7CQN5	SUFS_SALTY	Cysteine desulfurase OS=Salmonella typhimurium (strain LT2 / SGSC1412 / ATCC 700720) GN=sufS PE=3 SV=1	0.0226675	0.032166	0.0430893	0.0326409	0.0102191	0.0333919	0.0263217	0.0360375	0.0265836	0.0305837	0.00489201	1.06727	0.733892	0.0460888	0.0396459		0.00939676	0.0245213	0.0213894	0.801778	0.575691	0.0436807
P30705	PHOE_SALTY	Outer membrane pore protein E OS=Salmonella typhimurium (strain LT2 / SGSC1412 / ATCC 700720) GN=phoE PE=2 SV=1			0.028962	0.028962			0.0711144	0.0605794	0.0410187	0.0575708	0.0152717	0.503067			0.0618991	0.0597905	0.0231418	0.0482772	0.0217933	0.83857	0.577888	0.0437916
O84944	SSEA_SALTY	Type III secretion system chaperone SseA OS=Salmonella typhimurium (strain LT2 / SGSC1412 / ATCC 700720) GN=sseA PE=1 SV=1	0.118866	0.0857047	0.0852447	0.0966051	0.0192798	0.0617149	0.0715471	0.121421	0.116928	0.0929029	0.0306555	1.03985	0.863035	0.0479915	0.106193	0.0740253	0.0608767	0.0803651	0.023314	0.865044	0.582519	0.0439024
Q8ZM07	Q8ZM07_SALTY	Putative alcohol dehydrogenase OS=Salmonella typhimurium (strain LT2 / SGSC1412 / ATCC 700720) GN=yqhD PE=4 SV=1	0.226314			0.226314			0.0172281	0.00892991		0.013079	0.00586771	17.3036				0.0080601	0.0123032	0.0101817	0.00300034	0.778473	0.597538	0.0440133
Q8ZQE5	Q8ZQE5_SALTY	Putative membrane protein OS=Salmonella typhimurium (strain LT2 / SGSC1412 / ATCC 700720) GN=ybjY PE=4 SV=1	0.0239707	0.0638966	0.0438763	0.0439145	0.019963		0.0424097	0.0550364	0.0375636	0.0450032	0.00902049	0.975808	0.935539	0.0488372	0.0287108	0.0471211	0.0457402	0.040524	0.0102538	0.900469	0.600352	0.0441242
P20753	PPIA_SALTY	Peptidyl-prolyl cis-trans isomerase A OS=Salmonella typhimurium (strain LT2 / SGSC1412 / ATCC 700720) GN=ppiA PE=3 SV=2			0.0541356	0.0541356		0.0349019	0.0449692		0.0301033	0.0366581	0.00758699	1.47677			0.0371237	0.041065	0.0391369	0.0391085	0.00197078	1.06684	0.616953	0.044235
Q8ZNW4	Q8ZNW4_SALTY	2-keto-3-deoxygluconate 6-phosphate aldolase OS=Salmonella typhimurium (strain LT2 / SGSC1412 / ATCC 700720) GN=eda PE=4 SV=1	0.226637	0.170661	0.0840892	0.160462	0.071819	0.155471	0.0243112	0.0415053	0.0796415	0.0752323	0.0582758	2.13289	0.141868	0.0292812	0.069157	0.101807	0.111951	0.0943052	0.0223617	1.25352	0.620142	0.0443459
Q8ZP34	Q8ZP34_SALTY	Response regulator in two-component regulatory system with NarX (Or NarQ) OS=Salmonella typhimurium (strain LT2 / SGSC1412 / ATCC 700720) GN=narL PE=4 SV=1		0.0480619	0.0635549	0.0558084	0.0109552	0.045099	0.020095			0.032597	0.0176805	1.71207	0.255259	0.034778		0.0281487	0.0225984	0.0253736	0.00392471	0.778402	0.629534	0.0444568
Q7CPE4	ATPF_SALTY	ATP synthase subunit b OS=Salmonella typhimurium (strain LT2 / SGSC1412 / ATCC 700720) GN=atpF PE=3 SV=1	0.156183	0.147516	0.0442026	0.115967	0.062301	0.0760225	0.0949557	0.0418178	0.0912928	0.0760222	0.0242323	1.52544	0.28449	0.0357294	0.0295153	0.17377	0.0827921	0.0953593	0.0729441	1.25436	0.632846	0.0445676
Q8ZPN7	Q8ZPN7_SALTY	N-ethylmaleimide reductase OS=Salmonella typhimurium (strain LT2 / SGSC1412 / ATCC 700720) GN=nemA PE=4 SV=1		0.025635	0.0052827	0.0154589	0.0143913	0.0163561	0.0131563	0.0187152	0.018547	0.0166937	0.00259155	0.926032	0.859176	0.0478858	0.0215965	0.0084219	0.0275022	0.0191735	0.0097682	1.14855	0.638403	0.0446785
Q7CR66	ERPA_SALTY	Iron-sulfur cluster insertion protein ErpA OS=Salmonella typhimurium (strain LT2 / SGSC1412 / ATCC 700720) GN=erpA PE=3 SV=2	0.0768371		0.0390511	0.0579441	0.0267187		0.0358525	0.0184667		0.0271596	0.0122936	2.13346	0.276951	0.0354123	0.0488485		0.0225182	0.0356834	0.0186183	1.31384	0.643115	0.0447894
P63557	ARGB_SALTY	Acetylglutamate kinase OS=Salmonella typhimurium (strain LT2 / SGSC1412 / ATCC 700720) GN=argB PE=3 SV=1	0.0961984			0.0961984		0.0919221	0.0163441	0.0173135		0.0418599	0.0433578	2.2981				0.0484492	0.0692448	0.058847	0.0147047	1.40581	0.64449	0.0449002
Q8ZLF4	UGPC_SALTY	sn-glycerol-3-phosphate import ATP-binding protein UgpC OS=Salmonella typhimurium (strain LT2 / SGSC1412 / ATCC 700720) GN=ugpC PE=1 SV=1	0.0304194	0.0374213	0.0515747	0.0398051	0.0107772	0.0370416	0.076052	0.0726995	0.0709859	0.0641947	0.018224	0.620069	0.0972233	0.0258985	0.0635825	0.058281	0.0546037	0.0588224	0.00451383	0.916312	0.645927	0.0450111
Q7CQ55	Q7CQ55_SALTY	Putative inner membrane protein OS=Salmonella typhimurium (strain LT2 / SGSC1412 / ATCC 700720) GN=elaB PE=4 SV=1	0.116248	0.147638	0.188917	0.150934	0.0364466	0.0899101	0.0213049	0.0278824	0.0543145	0.048353	0.0311618	3.12151	0.0100795	0.0122622	0.0288521	0.0472338	0.0421429	0.0394096	0.0094908	0.81504	0.657623	0.045122
Q7CQK3	Q7CQK3_SALTY	NAD(P) transhydrogenase subunit beta OS=Salmonella typhimurium (strain LT2 / SGSC1412 / ATCC 700720) GN=pntB PE=3 SV=1	0.0657689	0.0550817	0.04085	0.0539002	0.0125014	0.087889	0.0426799	0.0538632	0.0904753	0.0687268	0.0240801	0.784267	0.381958	0.0382664		0.0699187	0.0502085	0.0600636	0.0139372	0.873947	0.672738	0.0452328
Q8ZM36	VIR17_SALTY	Virulence protein STM3117 OS=Salmonella typhimurium (strain LT2 / SGSC1412 / ATCC 700720) GN=STM3117 PE=1 SV=1	0.488182	0.291228	0.287889	0.355767	0.114688	0.146082	0.110462	0.153257	0.1177	0.131875	0.0209641	2.69775	0.0109184	0.0124736	0.124791	0.150939	0.138187	0.137972	0.0130754	1.04623	0.679633	0.0453437
Q8XFG8	Q8XFG8_SALTY	Peptidyl-prolyl cis-trans isomerase OS=Salmonella typhimurium (strain LT2 / SGSC1412 / ATCC 700720) GN=ppiB PE=3 SV=1	0.0221229		0.0413934	0.0317582	0.0136263	0.0370576	0.0349174			0.0359875	0.00151335	0.882477	0.705223	0.0458774		0.00980093	0.0460743	0.0279376	0.0256491	0.776314	0.701027	0.0454545
P63359	MSBA_SALTY	Lipid A export ATP-binding/permease protein MsbA OS=Salmonella typhimurium (strain LT2 / SGSC1412 / ATCC 700720) GN=msbA PE=1 SV=1			0.025069	0.025069			0.018643		0.0196847	0.0191638	0.000736577	1.30814			0.0187215		0.0205236	0.0196225	0.00127429	1.02393	0.702476	0.0455654
Q7CQY3	Q7CQY3_SALTY	Transcriptional repressor of iron-responsive genes (Fur family) (Ferric uptake regulator) OS=Salmonella typhimurium (strain LT2 / SGSC1412 / ATCC 700720) GN=fur PE=4 SV=1	0.083772	0.0860103	0.109178	0.0929869	0.0140669		0.0819298	0.0949178	0.0717543	0.0828673	0.0116102	1.12212	0.390981	0.0386892	0.104345	0.0866325	0.0718108	0.0875961	0.0162885	1.05706	0.703175	0.0456763
Q7CP78	RIDA_SALTY	2-iminobutanoate/2-iminopropanoate deaminase OS=Salmonella typhimurium (strain LT2 / SGSC1412 / ATCC 700720) GN=ridA PE=1 SV=1	0.324668	0.209549	0.0898887	0.208035	0.117397	0.142598	0.0454952	0.0692373	0.0992654	0.0891491	0.041878	2.33357	0.112768	0.027167	0.0605662	0.0893774	0.0886916	0.0795451	0.0164398	0.89227	0.727137	0.0457871
P0A1R0	HFQ_SALTY	RNA-binding protein Hfq OS=Salmonella typhimurium (strain LT2 / SGSC1412 / ATCC 700720) GN=hfq PE=1 SV=2	0.251608	0.153107	0.24082	0.215179	0.0540251	0.341601	0.237394	0.37576	0.401347	0.339026	0.0720397	0.634697	0.0559633	0.0218816	0.39621	0.240043	0.318477	0.318243	0.0780838	0.938699	0.729927	0.045898
Q8ZKI4	G6PI_SALTY	Glucose-6-phosphate isomerase OS=Salmonella typhimurium (strain LT2 / SGSC1412 / ATCC 700720) GN=pgi PE=3 SV=1	0.118983	0.142383	0.147436	0.136267	0.0151806	0.0629606	0.0890499	0.137325	0.101797	0.0977831	0.0309221	1.39357	0.108302	0.0264271	0.0827786	0.0920127	0.0984141	0.0910685	0.00786041	0.931332	0.733988	0.0460089
P06179	FLIC_SALTY	Flagellin OS=Salmonella typhimurium (strain LT2 / SGSC1412 / ATCC 700720) GN=fliC PE=1 SV=4		0.0286523		0.0286523		0.00782465	0.0144219		0.0158966	0.0127144	0.00429835	2.25353			0.0109723	0.0172842	0.0132266	0.0138277	0.0031986	1.08757	0.737109	0.0461197
P0A265	PPIC_SALTY	Peptidyl-prolyl cis-trans isomerase C OS=Salmonella typhimurium (strain LT2 / SGSC1412 / ATCC 700720) GN=ppiC PE=3 SV=2	0.0459382		0.0896404	0.0677893	0.0309022		0.0301844	0.0616945		0.0459394	0.022281	1.47562	0.502487	0.0417548	0.0615291	0.0422463	0.049262	0.0510124	0.00975984	1.11043	0.737816	0.0462306
P58663	RCSB_SALTY	Transcriptional regulatory protein RcsB OS=Salmonella typhimurium (strain LT2 / SGSC1412 / ATCC 700720) GN=rcsB PE=3 SV=1	0.0388679	0.0546616	0.0541247	0.0492181	0.0089675	0.135913	0.0165161		0.0403608	0.0642632	0.0631852	0.765883	0.703946	0.0457717		0.0276247	0.0666164	0.0471205	0.0275713	0.733243	0.750951	0.0463415
P0A1G5	DKSA_SALTY	RNA polymerase-binding transcription factor DksA OS=Salmonella typhimurium (strain LT2 / SGSC1412 / ATCC 700720) GN=dksA PE=3 SV=1	0.109076	0.0585955	0.0435405	0.0704039	0.0343264	0.139758	0.0484458	0.130256	0.0741977	0.0981645	0.0439935	0.717203	0.409581	0.0393235	0.0951683	0.0900787	0.0829834	0.0894102	0.0061199	0.910819	0.751784	0.0464523
Q8ZNV8	Q8ZNV8_SALTY	ABC superfamily high affinity Zn transport protein OS=Salmonella typhimurium (strain LT2 / SGSC1412 / ATCC 700720) GN=znuA PE=1 SV=1	0.40058	0.494857	0.51971	0.471716	0.0628464	0.318091	0.281917	0.388161	0.330291	0.329615	0.0441061	1.43111	0.0163913	0.0146934	0.212306	0.291148	0.427136	0.310197	0.108675	0.941087	0.75389	0.0465632
P0A1W2	LEP_SALTY	Signal peptidase I OS=Salmonella typhimurium (strain LT2 / SGSC1412 / ATCC 700720) GN=lepB PE=3 SV=1	0.0345593		0.0380501	0.0363047	0.0024684		0.0348964	0.0431585		0.0390274	0.0058422	0.930236	0.605519	0.0437632	0.022067	0.0350393	0.0492773	0.0354612	0.01361	0.908623	0.758729	0.0466741
P0A2S0	LRP_SALTY	Leucine-responsive regulatory protein OS=Salmonella typhimurium (strain LT2 / SGSC1412 / ATCC 700720) GN=lrp PE=3 SV=2	0.0763826	0.0512853	0.0651367	0.0642682	0.0125712	0.0861189	0.105404	0.108512	0.121595	0.105407	0.0146482	0.609714	0.0115515	0.0127907	0.0806826	0.0574752	0.153193	0.0971171	0.0499306	0.921351	0.759426	0.0467849
Q8ZLT1	RBFA_SALTY	Ribosome-binding factor A OS=Salmonella typhimurium (strain LT2 / SGSC1412 / ATCC 700720) GN=rbfA PE=3 SV=1	0.0312915		0.0527989	0.0420452	0.0152081		0.035662		0.0281364	0.0318992	0.00532136	1.31806	0.467137	0.0408034	0.0296908	0.0338139	0.0356499	0.0330515	0.00305179	1.03612	0.770571	0.0468958
P66032	RIBB_SALTY	3,4-dihydroxy-2-butanone 4-phosphate synthase OS=Salmonella typhimurium (strain LT2 / SGSC1412 / ATCC 700720) GN=ribB PE=1 SV=1			0.0283405	0.0283405			0.0293887	0.0117446		0.0205666	0.0124762	1.37798			0.0160817		0.0192165	0.0176491	0.00221668	0.858142	0.775628	0.0470067
Q8ZNZ3	Q8ZNZ3_SALTY	Putative inner membrane protein OS=Salmonella typhimurium (strain LT2 / SGSC1412 / ATCC 700720) GN=STM1849 PE=4 SV=1		0.0186534		0.0186534			0.0248837	0.0109009		0.0178923	0.00988732	1.04253				0.017936	0.0131914	0.0155637	0.00335494	0.869854	0.782322	0.0471175
P0A803	RPOZ_SALTY	DNA-directed RNA polymerase subunit omega OS=Salmonella typhimurium (strain LT2 / SGSC1412 / ATCC 700720) GN=rpoZ PE=3 SV=1	0.110663		0.0154499	0.0630564	0.0673258	0.114164			0.0555589	0.0848614	0.0414399	0.743052	0.734116	0.0461945		0.0796887	0.0722634	0.0759761	0.00525048	0.895297	0.791942	0.0472284
Q7CQX4	Q7CQX4_SALTY	Dihydrolipoyllysine-residue succinyltransferase component of 2-oxoglutarate dehydrogenase complex OS=Salmonella typhimurium (strain LT2 / SGSC1412 / ATCC 700720) GN=sucB PE=3 SV=1	0.154959	0.150999	0.20534	0.170433	0.0302954	0.143582	0.140791	0.130724	0.0958066	0.127726	0.0219844	1.33436	0.080978	0.0244186	0.123768	0.116224	0.131889	0.12396	0.00783413	0.970517	0.792139	0.0473392
Q8ZNU4	Q8ZNU4_SALTY	Ferritin OS=Salmonella typhimurium (strain LT2 / SGSC1412 / ATCC 700720) GN=ftn PE=3 SV=1	0.0381178	0.0988431	0.0318961	0.0562857	0.0369868		0.0401599	0.0527822	0.0479001	0.0469474	0.00636485	1.19891	0.688702	0.0453488		0.054408	0.0343984	0.0444032	0.0141489	0.945808	0.792197	0.0474501
Q8ZM80	YGFZ_SALTY	tRNA-modifying protein YgfZ OS=Salmonella typhimurium (strain LT2 / SGSC1412 / ATCC 700720) GN=ygfZ PE=3 SV=1	0.0983736	0.114556	0.0946171	0.102515	0.0105949	0.068709	0.0622394	0.0899758	0.0741091	0.0737584	0.0118506	1.38988	0.0211713	0.0160677	0.155803	0.051105	0.0395474	0.0821518	0.0640451	1.1138	0.801878	0.047561
Q8ZR70	Q8ZR70_SALTY	N5-carboxyaminoimidazole ribonucleotide mutase OS=Salmonella typhimurium (strain LT2 / SGSC1412 / ATCC 700720) GN=purE PE=3 SV=1	0.370899	0.113631	0.0580348	0.180855	0.166914	0.0769942			0.0314304	0.0542123	0.0322185	3.33605	0.387464	0.0385835		0.0454671	0.0499454	0.0477062	0.00316664	0.879989	0.802972	0.0476718
Q8ZPM9	PDXH_SALTY	Pyridoxine/pyridoxamine 5'-phosphate oxidase OS=Salmonella typhimurium (strain LT2 / SGSC1412 / ATCC 700720) GN=pdxH PE=3 SV=1			0.0269726	0.0269726			0.0294027		0.0211825	0.0252926	0.00581254	1.06642			0.0396908	0.0216845	0.0212519	0.0275424	0.010523	1.08895	0.806641	0.0477827
P23988	PAGC_SALTY	Virulence membrane protein PagC OS=Salmonella typhimurium (strain LT2 / SGSC1412 / ATCC 700720) GN=pagC PE=3 SV=2	1.57848	2.4678	2.13417	2.06015	0.449256	1.74719	0.742124	1.71121	1.76866	1.4923	0.500677	1.38052	0.18266	0.0313953	1.27689	2.09562	1.37795	1.58349	0.44639	1.06111	0.813341	0.0478936
P0A7W4	RS5_SALTY	30S ribosomal protein S5 OS=Salmonella typhimurium (strain LT2 / SGSC1412 / ATCC 700720) GN=rpsE PE=1 SV=2	0.514211	0.504886	0.46025	0.493116	0.0288423	0.875674	0.358955	0.412605	0.794972	0.610551	0.262542	0.807656	0.485342	0.0414376	0.449377	0.763423	0.745705	0.652835	0.176422	1.06926	0.820835	0.0480044
P37409	BTUB_SALTY	Vitamin B12 transporter BtuB OS=Salmonella typhimurium (strain LT2 / SGSC1412 / ATCC 700720) GN=btuB PE=3 SV=2			0.0240696	0.0240696			0.0213003	0.0310091	0.0331107	0.0284734	0.00630029	0.845338			0.0203682	0.0201109	0.0399954	0.0268248	0.0114068	0.942103	0.837285	0.0481153
P60446	RL3_SALTY	50S ribosomal protein L3 OS=Salmonella typhimurium (strain LT2 / SGSC1412 / ATCC 700720) GN=rplC PE=3 SV=1	0.224138	0.337839	0.253701	0.271892	0.058993	0.185724	0.304264	0.275898	0.262746	0.257158	0.050676	1.0573	0.73621	0.0463002	0.242326	0.213023	0.34512	0.266823	0.0693723	1.03758	0.8383	0.0482262
Q8ZQZ7	LPTE_SALTY	LPS-assembly lipoprotein LptE OS=Salmonella typhimurium (strain LT2 / SGSC1412 / ATCC 700720) GN=lptE PE=1 SV=1	0.0328703			0.0328703		0.0350456			0.0222892	0.0286674	0.00902015	1.14661				0.043844	0.019507	0.0316755	0.0172088	1.10493	0.847002	0.048337
Q8ZP84	USPE_SALTY	Universal stress protein E OS=Salmonella typhimurium (strain LT2 / SGSC1412 / ATCC 700720) GN=uspE PE=1 SV=3	0.103005	0.0915482	0.0661517	0.0869015	0.0188608		0.0283322	0.038737	0.0310126	0.0326939	0.00540231	2.65803	0.00873944	0.0114165		0.0403055	0.0274096	0.0338575	0.00911879	1.03559	0.86461	0.0484479
Q7CPD3	Q7CPD3_SALTY	Putative cytoplasmic protein OS=Salmonella typhimurium (strain LT2 / SGSC1412 / ATCC 700720) GN=yihD PE=4 SV=1						0.0124916	0.0585958	0.0719251	0.0718274	0.05371	0.0281831				0.101098	0.032124	0.0402845	0.0578356	0.037688	1.07681	0.873825	0.0485588
P64394	IHFB_SALTY	Integration host factor subunit beta OS=Salmonella typhimurium (strain LT2 / SGSC1412 / ATCC 700720) GN=ihfB PE=3 SV=1	0.146766	0.0999812	0.120325	0.122357	0.0234585		0.101262	0.15878		0.130021	0.0406714	0.941061	0.799749	0.0471459	0.0971964	0.185463	0.127548	0.136736	0.0448449	1.05165	0.876466	0.0486696
P0A7K0	RL11_SALTY	50S ribosomal protein L11 OS=Salmonella typhimurium (strain LT2 / SGSC1412 / ATCC 700720) GN=rplK PE=3 SV=2	0.286946	0.231945	0.0865767	0.201823	0.103525	0.138002	0.0655856	0.0580591	0.233765	0.123853	0.0816592	1.62954	0.313082	0.0368922	0.0370747	0.190474	0.119228	0.115592	0.0767644	0.933303	0.897397	0.0487805
Q8ZM75	GCSH_SALTY	Glycine cleavage system H protein OS=Salmonella typhimurium (strain LT2 / SGSC1412 / ATCC 700720) GN=gcvH PE=3 SV=3	0.188529	0.168591	0.302327	0.219816	0.0721493	0.275014	0.0952581	0.0707983	0.134652	0.143931	0.091262	1.52724	0.290764	0.0360465	0.206662	0.123789	0.0758792	0.135443	0.066166	0.941033	0.897676	0.0488914
P67093	USPG_SALTY	Universal stress protein G OS=Salmonella typhimurium (strain LT2 / SGSC1412 / ATCC 700720) GN=uspG PE=3 SV=1	0.328803	0.424185	0.345068	0.366019	0.0510257	0.189164	0.122259	0.136972	0.193505	0.160475	0.0361794	2.28084	0.00148617	0.00591966	0.0906891	0.219031	0.185376	0.165032	0.0665457	1.0284	0.910662	0.0490022
Q7CPL4	RL16_SALTY	50S ribosomal protein L16 OS=Salmonella typhimurium (strain LT2 / SGSC1412 / ATCC 700720) GN=rplP PE=3 SV=1	0.336795	0.429685	0.426002	0.397494	0.0525988	0.481081	0.435323	0.43088	0.413703	0.440247	0.0287752	0.902889	0.220993	0.0336152	0.366354	0.481544	0.485097	0.444332	0.0675537	1.00928	0.915948	0.0491131
Q8ZLI7	NFUA_SALTY	Fe/S biogenesis protein NfuA OS=Salmonella typhimurium (strain LT2 / SGSC1412 / ATCC 700720) GN=nfuA PE=3 SV=1	0.0792244	0.102708	0.0746324	0.0855217	0.01506		0.0820506	0.0684484	0.0624275	0.0709755	0.0100527	1.20495	0.23648	0.0342495	0.049533	0.0765961	0.0829459	0.0696917	0.0177443	0.981912	0.918427	0.0492239
P0A2B1	RS20_SALTY	30S ribosomal protein S20 OS=Salmonella typhimurium (strain LT2 / SGSC1412 / ATCC 700720) GN=rpsT PE=3 SV=2	0.173882	0.153719	0.185471	0.171024	0.016068	0.219102	0.263883	0.336165	0.339365	0.289629	0.0585269	0.590494	0.0204971	0.0156448	0.241547	0.340048	0.299015	0.293536	0.0494785	1.01349	0.929609	0.0493348
P26353	HMP_SALTY	Flavohemoprotein OS=Salmonella typhimurium (strain LT2 / SGSC1412 / ATCC 700720) GN=hmp PE=2 SV=3	0.066915	0.0557233	0.0472508	0.0566297	0.0098634		0.0576928		0.0363529	0.0470229	0.0150896	1.2043	0.4404	0.0402748	0.0443113	0.0451307	0.0541607	0.0478676	0.00546539	1.01796	0.930643	0.0494457
P64076	ENO_SALTY	Enolase OS=Salmonella typhimurium (strain LT2 / SGSC1412 / ATCC 700720) GN=eno PE=3 SV=2	1.51734	1.27169	1.41055	1.39986	0.123172	1.86979	1.03901	1.16269	1.36867	1.36004	0.366028	1.02928	0.866221	0.0480973	1.46205	1.16692	1.50011	1.37636	0.182373	1.012	0.947052	0.0495565
Q7CR64	YAEH_SALTY	UPF0325 protein YaeH OS=Salmonella typhimurium (strain LT2 / SGSC1412 / ATCC 700720) GN=yaeH PE=3 SV=1	0.0662384	0.0552192	0.0856585	0.0690387	0.0154117	0.0474941	0.0600664	0.0501349	0.0535093	0.0528012	0.00543318	1.30752	0.101621	0.0262156	0.0575286	0.056113	0.0437539	0.0524652	0.00757729	0.993636	0.947677	0.0496674
P37592	OMPD_SALTY	Outer membrane porin protein OmpD OS=Salmonella typhimurium (strain LT2 / SGSC1412 / ATCC 700720) GN=ompD PE=1 SV=2	0.436693	0.52192	0.539937	0.499517	0.0551479	0.651179	0.685078	0.691086	0.640056	0.66685	0.0250541	0.749069	0.00273895	0.00739958	0.740756	0.592193	0.660833	0.664594	0.0743532	0.996617	0.955955	0.0497783
Q8ZPD6	YNCE_SALTY	Uncharacterized protein YncE OS=Salmonella typhimurium (strain LT2 / SGSC1412 / ATCC 700720) GN=yncE PE=3 SV=1	0.158928	0.200253	0.131537	0.163573	0.0345926	0.27938	0.299103	0.264928	0.292221	0.283908	0.0150635	0.576147	0.00142601	0.00570825	0.170747	0.309303	0.374099	0.284716	0.103882	1.00285	0.987958	0.0498891
P37439	PTGCB_SALTY	PTS system glucose-specific EIICB component OS=Salmonella typhimurium (strain LT2 / SGSC1412 / ATCC 700720) GN=ptsG PE=3 SV=2	0.116425	0.0638431		0.0901341	0.037181	0.0743163	0.0417583	0.0807945	0.200367	0.099309	0.0695035	0.907613	0.87461	0.048203		0.112755	0.0870496	0.0999025	0.0181768	1.00598	0.991556	0.05
Q8ZM76	GCSP_SALTY	Glycine dehydrogenase (decarboxylating) OS=Salmonella typhimurium (strain LT2 / SGSC1412 / ATCC 700720) GN=gcvP PE=3 SV=3	0.0436694	0.0222053	0.0198863	0.028587	0.0131131	0.128681	0.123911	0.143272	0.11515	0.127754	0.0117659	0.223767	0.000132964	0.0012685			0.00820044	0.00820044		0.0641895
Q8ZKM0	CAPP_SALTY	Phosphoenolpyruvate carboxylase OS=Salmonella typhimurium (strain LT2 / SGSC1412 / ATCC 700720) GN=ppc PE=3 SV=1	0.0299483		0.0263245	0.0281364	0.00256239	0.122052	0.120961	0.135383	0.114815	0.123303	0.00866066	0.22819	0.000133627	0.00137421
P15434	SYFB_SALTY	Phenylalanine--tRNA ligase beta subunit OS=Salmonella typhimurium (strain LT2 / SGSC1412 / ATCC 700720) GN=pheT PE=3 SV=3	0.0347798	0.0265746	0.0214462	0.0276002	0.0067257	0.131049	0.107558	0.114407	0.108208	0.115306	0.0109401	0.239366	6.7799e-05	0.00105708
P15111	DHE4_SALTY	NADP-specific glutamate dehydrogenase OS=Salmonella typhimurium (strain LT2 / SGSC1412 / ATCC 700720) GN=gdhA PE=3 SV=2	0.0223735		0.0113883	0.0168809	0.00776768	0.0757032	0.0643803	0.0730525	0.0629888	0.0690312	0.00629358	0.24454	0.00084467	0.00412262
Q9ZFV8	MAO2_SALTY	NADP-dependent malic enzyme OS=Salmonella typhimurium (strain LT2 / SGSC1412 / ATCC 700720) GN=maeB PE=3 SV=2	0.0515483	0.0253219	0.0399896	0.0389532	0.0131439	0.18696	0.132991	0.167929	0.131626	0.154877	0.0271988	0.251511	0.0011196	0.00486258			0.0189015	0.0189015		0.122042
P0A2I3	GYRB_SALTY	DNA gyrase subunit B OS=Salmonella typhimurium (strain LT2 / SGSC1412 / ATCC 700720) GN=gyrB PE=3 SV=2	0.0122693		0.0208654	0.0165673	0.0060783	0.0619612	0.0484879	0.0577007	0.0629643	0.0577785	0.00660073	0.286739	0.00182452	0.00613108
Q8ZK31	SYV_SALTY	Valine--tRNA ligase OS=Salmonella typhimurium (strain LT2 / SGSC1412 / ATCC 700720) GN=valS PE=3 SV=1	0.0154937		0.0177704	0.016632	0.00160984	0.0479867	0.0477619	0.0619201	0.0534789	0.0527869	0.00663794	0.315079	0.00198029	0.0064482
P26978	PUR9_SALTY	Bifunctional purine biosynthesis protein PurH OS=Salmonella typhimurium (strain LT2 / SGSC1412 / ATCC 700720) GN=purH PE=3 SV=2	0.0463742	0.0294925	0.0345195	0.0367954	0.00866792	0.118575	0.0886403	0.0963454	0.100443	0.101001	0.0126968	0.364307	0.000680446	0.00338266			0.0219052	0.0219052		0.216881
Q7CQE8	Q7CQE8_SALTY	Ribosome-binding ATPase YchF OS=Salmonella typhimurium (strain LT2 / SGSC1412 / ATCC 700720) GN=ychF PE=3 SV=1	0.0198358		0.0181639	0.0189998	0.0011822	0.0433607	0.0427591	0.0460772	0.0431088	0.0438264	0.00152064	0.433524	3.79273e-05	0.000739958
Q8ZKF6	ACSA_SALTY	Acetyl-coenzyme A synthetase OS=Salmonella typhimurium (strain LT2 / SGSC1412 / ATCC 700720) GN=acs PE=1 SV=1	0.0322521	0.0246802	0.0221927	0.026375	0.0052395	0.0438398	0.0661768	0.0716649	0.0602744	0.0604889	0.0120346	0.43603	0.00631366	0.0100423
O68883	CISY_SALTY	Citrate synthase OS=Salmonella typhimurium (strain LT2 / SGSC1412 / ATCC 700720) GN=gltA PE=3 SV=1	0.0744814	0.0382081	0.0515653	0.0547516	0.0183454		0.123209	0.12013	0.125319	0.122886	0.00260958	0.445549	0.00311706	0.0077167
Q7CPM0	Q7CPM0_SALTY	Acetyl CoA carboxylase OS=Salmonella typhimurium (strain LT2 / SGSC1412 / ATCC 700720) GN=accC PE=4 SV=1	0.0644658		0.0390043	0.051735	0.018004	0.111677	0.124642	0.116396	0.0995338	0.113062	0.0104904	0.45758	0.00520102	0.00930233			0.0238452	0.0238452		0.210903
P63365	PSTB_SALTY	Phosphate import ATP-binding protein PstB OS=Salmonella typhimurium (strain LT2 / SGSC1412 / ATCC 700720) GN=pstB PE=3 SV=2	0.0295857	0.0498035	0.0319742	0.0371211	0.011048		0.0695135	0.0890106	0.0742553	0.0775931	0.0101681	0.478407	0.00952778	0.011945
P41033	PCKA_SALTY	Phosphoenolpyruvate carboxykinase [ATP] OS=Salmonella typhimurium (strain LT2 / SGSC1412 / ATCC 700720) GN=pckA PE=3 SV=2	0.0539891	0.0329146	0.0629583	0.049954	0.015423	0.103428	0.0827721	0.0986455	0.0962094	0.0952639	0.00885126	0.524375	0.00419116	0.00866808
P65692	PFKA_SALTY	ATP-dependent 6-phosphofructokinase OS=Salmonella typhimurium (strain LT2 / SGSC1412 / ATCC 700720) GN=pfkA PE=3 SV=1	0.115033	0.0876831	0.0916876	0.0981347	0.014771	0.168579	0.16828	0.179056	0.177474	0.173347	0.00571627	0.566117	0.000215731	0.00232558			0.0695303	0.0695303		0.401104
Q8ZM09	Q8ZM09_SALTY	Putative oxidoreductase OS=Salmonella typhimurium (strain LT2 / SGSC1412 / ATCC 700720) GN=yghA PE=1 SV=1	0.0473933	0.037597	0.0444166	0.0431356	0.00502219		0.0192015		0.0160492	0.0176254	0.00222901	2.44736	0.00738748	0.0108879	0.0192327			0.0192327		1.0912
P0A2K7	GALF_SALTY	UTP--glucose-1-phosphate uridylyltransferase OS=Salmonella typhimurium (strain LT2 / SGSC1412 / ATCC 700720) GN=galF PE=3 SV=1	0.0661649		0.0616154	0.0638901	0.00321696		0.0366532	0.0297636		0.0332084	0.00487168	1.92391	0.0176252	0.0151163		0.0126108		0.0126108		0.379747
P66491	RS19_SALTY	30S ribosomal protein S19 OS=Salmonella typhimurium (strain LT2 / SGSC1412 / ATCC 700720) GN=rpsS PE=3 SV=2	0.0428558		0.0877588	0.0653073	0.0317512		0.144981	0.173085	0.152336	0.156801	0.0145742	0.416499	0.0194731	0.0155391		0.0215581		0.0215581		0.137487
Q8ZPL7	FUMC_SALTY	Fumarate hydratase class II OS=Salmonella typhimurium (strain LT2 / SGSC1412 / ATCC 700720) GN=fumC PE=3 SV=1	0.039162		0.0328096	0.0359858	0.0044918		0.0556035	0.0575621	0.0491172	0.0540943	0.00442009	0.665242	0.0209421	0.0157505
Q8ZMM8	PIPB2_SALTY	Secreted effector protein pipB2 OS=Salmonella typhimurium (strain LT2 / SGSC1412 / ATCC 700720) GN=pipB2 PE=1 SV=1	0.0280187		0.0149768	0.0214977	0.00922201	0.0395509	0.0642174	0.0611399	0.0544607	0.0548422	0.0109776	0.391992	0.0218871	0.0161734	0.0188669			0.0188669		0.344021
P10369	HIS8_SALTY	Histidinol-phosphate aminotransferase OS=Salmonella typhimurium (strain LT2 / SGSC1412 / ATCC 700720) GN=hisC PE=3 SV=2	0.0400825		0.0264479	0.0332652	0.00964114	0.0531196	0.0479479	0.0628102	0.060268	0.0560364	0.00677548	0.593635	0.0257595	0.0171247
Q8ZQT2	Q8ZQT2_SALTY	Phospho-2-dehydro-3-deoxyheptonate aldolase OS=Salmonella typhimurium (strain LT2 / SGSC1412 / ATCC 700720) GN=aroG PE=3 SV=1	0.0200747		0.0180561	0.0190654	0.00142732		0.0766477	0.0646542	0.0467443	0.0626821	0.0150489	0.30416	0.0303276	0.0179704
Q8ZNW2	Q8ZNW2_SALTY	Glucose-6-phosphate 1-dehydrogenase OS=Salmonella typhimurium (strain LT2 / SGSC1412 / ATCC 700720) GN=zwf PE=3 SV=1	0.0348984		0.0142038	0.0245511	0.0146333		0.06371	0.0509674	0.0578038	0.0574937	0.00637695	0.427023	0.0358354	0.0191332
P0A1D7	CLPP_SALTY	ATP-dependent Clp protease proteolytic subunit OS=Salmonella typhimurium (strain LT2 / SGSC1412 / ATCC 700720) GN=clpP PE=3 SV=1		0.17102	0.122424	0.146722	0.0343628	0.0443827	0.0377653			0.041074	0.00467921	3.57213	0.0498807	0.0214588
Q8ZLS5	OBG_SALTY	GTPase Obg OS=Salmonella typhimurium (strain LT2 / SGSC1412 / ATCC 700720) GN=obg PE=1 SV=1	0.0135674		0.0170973	0.0153324	0.00249602		0.0231339		0.0263793	0.0247566	0.00229483	0.619326	0.0590464	0.0223044
Q8ZQX5	SYQ_SALTY	Glutamine--tRNA ligase OS=Salmonella typhimurium (strain LT2 / SGSC1412 / ATCC 700720) GN=glnS PE=3 SV=3	0.0328552		0.0468104	0.0398328	0.00986781	0.0969772	0.0672843	0.0686363	0.0604878	0.0733464	0.0161523	0.543078	0.0594868	0.0224101
Q7CPA1	Q7CPA1_SALTY	Aspartate ammonia-lyase OS=Salmonella typhimurium (strain LT2 / SGSC1412 / ATCC 700720) GN=aspA PE=3 SV=1	0.0178076	0.0195547		0.0186812	0.00123542	0.0835092	0.0509402	0.0324773	0.0718643	0.0596977	0.0226028	0.312929	0.0728928	0.0234672
P0CL07	GSA_SALTY	Glutamate-1-semialdehyde 2,1-aminomutase OS=Salmonella typhimurium (strain LT2 / SGSC1412 / ATCC 700720) GN=hemL PE=3 SV=1	0.0531855		0.0449038	0.0490446	0.00585608		0.0666466	0.0645156	0.0557788	0.0623136	0.00575881	0.787061	0.0869506	0.0250529	0.0265078			0.0265078		0.425394
P65921	PYRG_SALTY	CTP synthase OS=Salmonella typhimurium (strain LT2 / SGSC1412 / ATCC 700720) GN=pyrG PE=3 SV=2	0.0258535	0.0227553	0.0189571	0.022522	0.00345408		0.0342566	0.0280152		0.0311359	0.0044133	0.723344	0.0890612	0.02537
Q7CP63	Q7CP63_SALTY	Response regulator (OmpR family) in two-component regulatory system with ArcB (Or CpxA) OS=Salmonella typhimurium (strain LT2 / SGSC1412 / ATCC 700720) GN=arcA PE=4 SV=1	0.0695413	0.112501	0.111424	0.097822	0.0244978	0.0432603	0.0809666	0.0519209	0.0842535	0.0651003	0.0205691	1.50263	0.11181	0.0269556
P27237	OPDA_SALTY	Oligopeptidase A OS=Salmonella typhimurium (strain LT2 / SGSC1412 / ATCC 700720) GN=prlC PE=1 SV=1	0.0778328		0.0557737	0.0668032	0.0155981	0.094947	0.136132	0.113581	0.0795199	0.106045	0.0244183	0.629952	0.114749	0.0274841
Q8ZQT9	Q8ZQT9_SALTY	Cytochrome d terminal oxidase, polypeptide subunit I OS=Salmonella typhimurium (strain LT2 / SGSC1412 / ATCC 700720) GN=cydA PE=4 SV=1	0.0525473	0.0643855	0.0312075	0.0493801	0.0168142	0.0696307			0.101446	0.0855385	0.0224969	0.577285	0.12707	0.0285412		0.0588324		0.0588324		0.687788
Q8ZLK4	Q8ZLK4_SALTY	Ribulose-phosphate 3-epimerase OS=Salmonella typhimurium (strain LT2 / SGSC1412 / ATCC 700720) GN=rpe PE=3 SV=1	0.0282091	0.107902	0.0687126	0.0682747	0.0398484	0.0480918	0.0196157	0.0293388	0.0311102	0.0320391	0.0118348	2.13098	0.137106	0.0290698			0.0182255	0.0182255		0.56885
Q8ZPS3	Q8ZPS3_SALTY	Phosphoenolpyruvate synthase OS=Salmonella typhimurium (strain LT2 / SGSC1412 / ATCC 700720) GN=pps PE=3 SV=1	0.0435024	0.0860103	0.0294351	0.0529826	0.0294549		0.0796635	0.0876235	0.0850464	0.0841111	0.00406159	0.629912	0.143993	0.0293869	0.0163855			0.0163855		0.194808
P0A1B5	AROF_SALTY	Phospho-2-dehydro-3-deoxyheptonate aldolase, Tyr-sensitive OS=Salmonella typhimurium (strain LT2 / SGSC1412 / ATCC 700720) GN=aroF PE=3 SV=1	0.0416112		0.0210184	0.0313148	0.0145613		0.0525366	0.0704399		0.0614882	0.0126596	0.509281	0.157525	0.0302326	0.00642392			0.00642392		0.104474
Q8ZKI5	Q8ZKI5_SALTY	Aspartokinase OS=Salmonella typhimurium (strain LT2 / SGSC1412 / ATCC 700720) GN=lysC PE=3 SV=1	0.0553507	0.0263149	0.0319492	0.0378716	0.0153973		0.0463656	0.0652206	0.0554735	0.0556866	0.00942933	0.680085	0.162629	0.030444
Q8ZNW5	PURT_SALTY	Phosphoribosylglycinamide formyltransferase 2 OS=Salmonella typhimurium (strain LT2 / SGSC1412 / ATCC 700720) GN=purT PE=3 SV=1	0.0235597		0.0282218	0.0258907	0.00329662	0.0368317	0.0328603	0.0756938	0.0757745	0.0552901	0.0236624	0.468271	0.174029	0.0309725
P0A1R2	HIS6_SALTY	Imidazole glycerol phosphate synthase subunit HisF OS=Salmonella typhimurium (strain LT2 / SGSC1412 / ATCC 700720) GN=hisF PE=3 SV=1	0.0245103	0.0349312	0.0166304	0.0253573	0.00917972		0.0311711	0.0413466	0.0329645	0.0351607	0.00543167	0.721182	0.186615	0.0317125	0.0212413			0.0212413		0.604119
P74883	PUR5_SALTY	Phosphoribosylformylglycinamidine cyclo-ligase OS=Salmonella typhimurium (strain LT2 / SGSC1412 / ATCC 700720) GN=purM PE=3 SV=3		0.0305466	0.0173097	0.0239282	0.00935991		0.0594286	0.0380549		0.0487418	0.0151135	0.490917	0.187091	0.0318182
Q7CQP3	Q7CQP3_SALTY	Transcriptional activator of ntrL protein OS=Salmonella typhimurium (strain LT2 / SGSC1412 / ATCC 700720) GN=osmE PE=4 SV=1	0.0524989	0.122515	0.0932226	0.0894122	0.0351632		0.0463284		0.0439386	0.0451335	0.00168987	1.98106	0.189906	0.0319239
Q8ZK29	AMPA_SALTY	Probable cytosol aminopeptidase OS=Salmonella typhimurium (strain LT2 / SGSC1412 / ATCC 700720) GN=pepA PE=3 SV=1	0.0317426		0.0139914	0.022867	0.0125519		0.0618393	0.0555739	0.0273771	0.0482635	0.0183574	0.473795	0.193309	0.0321353
Q8ZKP1	ZAPB_SALTY	Cell division protein ZapB OS=Salmonella typhimurium (strain LT2 / SGSC1412 / ATCC 700720) GN=zapB PE=3 SV=1		0.211153	0.0813096	0.146231	0.0918131	0.0142985		0.033067		0.0236828	0.0132714	6.17459	0.202681	0.0325581
Q8ZP98	Q8ZP98_SALTY	Putative SAM-dependent methyltransferase OS=Salmonella typhimurium (strain LT2 / SGSC1412 / ATCC 700720) GN=STM1638 PE=4 SV=1	0.0246673		0.0262261	0.0254467	0.00110225	0.0276822	0.0551613		0.0422855	0.0417097	0.0137486	0.610092	0.211262	0.0334038		0.0129553		0.0129553		0.310607
Q8ZJZ3	Q8ZJZ3_SALTY	Putative NAD-dependent aldehyde dehydrogenase OS=Salmonella typhimurium (strain LT2 / SGSC1412 / ATCC 700720) GN=STM4519 PE=3 SV=1	0.0686107	0.204515	0.0419852	0.105037	0.087173		0.0156227		0.016165	0.0158938	0.000383503	6.60866	0.26367	0.0348837
Q8ZNE1	Q8ZNE1_SALTY	LysR family NADH dehydrogenase transcriptional repressor OS=Salmonella typhimurium (strain LT2 / SGSC1412 / ATCC 700720) GN=lrhA PE=4 SV=1	0.0262845		0.0151157	0.0207001	0.00789751	0.022214	0.0309661		0.0346331	0.029271	0.00638069	0.707188	0.2681	0.0350951
P64222	GCST_SALTY	Aminomethyltransferase OS=Salmonella typhimurium (strain LT2 / SGSC1412 / ATCC 700720) GN=gcvT PE=3 SV=1	0.0614319	0.0393539	0.052218	0.0510013	0.0110892		0.066093	0.0588857		0.0624893	0.00509636	0.81616	0.277973	0.035518
P0A2P2	SYW_SALTY	Tryptophan--tRNA ligase OS=Salmonella typhimurium (strain LT2 / SGSC1412 / ATCC 700720) GN=trpS PE=3 SV=1		0.0445328	0.0998686	0.0722007	0.0391283	0.0538654	0.0255305			0.039698	0.0200358	1.81875	0.405481	0.0391121			0.0102803	0.0102803		0.258963
Q8ZKQ0	LSRF_SALTY	Uncharacterized aldolase LsrF OS=Salmonella typhimurium (strain LT2 / SGSC1412 / ATCC 700720) GN=lsrF PE=2 SV=1	0.0317041	0.0703359	0.0334733	0.0451711	0.0218113	0.0675319	0.0561385	0.0446149	0.0548818	0.0557918	0.00937553	0.809637	0.413261	0.0395349			0.012969	0.012969		0.232454
Q8ZPP1	Q8ZPP1_SALTY	Riboflavin synthase, alpha chain OS=Salmonella typhimurium (strain LT2 / SGSC1412 / ATCC 700720) GN=ribE PE=4 SV=1	0.106242	0.108513	0.0815329	0.0987629	0.0149648	0.101948	0.0336981	0.0964089	0.0925676	0.0811557	0.0318718	1.21696	0.423139	0.0396406			0.0610194	0.0610194		0.751881
Q7CPE7	Q7CPE7_SALTY	Phosphate-specific transport system accessory protein PhoU OS=Salmonella typhimurium (strain LT2 / SGSC1412 / ATCC 700720) GN=phoU PE=3 SV=1	0.0299583	0.0645077	0.116001	0.0701556	0.0432984	0.13635	0.0569668	0.0932471	0.0901824	0.0941867	0.0325577	0.744857	0.436577	0.039852	0.0540081			0.0540081		0.573415
P63223	GMHA_SALTY	Phosphoheptose isomerase OS=Salmonella typhimurium (strain LT2 / SGSC1412 / ATCC 700720) GN=gmhA PE=3 SV=1	0.0249112		0.0370336	0.0309724	0.0085718		0.0213189	0.0255413	0.0307442	0.0258681	0.00472113	1.19732	0.438411	0.0400634			0.0166733	0.0166733		0.644551
Q8ZP91	Q8ZP91_SALTY	NAD-dependent fermentative D-lactate dehydrogenase OS=Salmonella typhimurium (strain LT2 / SGSC1412 / ATCC 700720) GN=ldhA PE=3 SV=1	0.0790189	0.0541574	0.0330423	0.0554062	0.0230138		0.0499956	0.0393439	0.0432737	0.0442044	0.00538649	1.25341	0.457818	0.040592	0.0354622			0.0354622		0.802232
P0A1Y4	NUOG_SALTY	NADH-quinone oxidoreductase subunit G OS=Salmonella typhimurium (strain LT2 / SGSC1412 / ATCC 700720) GN=nuoG PE=3 SV=2	0.0235496		0.0713204	0.047435	0.033779			0.0322751	0.0284198	0.0303474	0.00272614	1.56306	0.549772	0.042389
H9L426	H9L426_SALTY	Secretion system chaparone OS=Salmonella typhimurium (strain LT2 / SGSC1412 / ATCC 700720) GN=sscA PE=4 SV=1	0.0512893		0.0466043	0.0489468	0.00331281		0.0419398		0.0497031	0.0458215	0.00548948	1.06821	0.561838	0.0426004
Q8ZQX7	NAGB_SALTY	Glucosamine-6-phosphate deaminase OS=Salmonella typhimurium (strain LT2 / SGSC1412 / ATCC 700720) GN=nagB PE=3 SV=1	0.0771077		0.0968985	0.0870031	0.0139942		0.0860948	0.0711102		0.0786025	0.0105957	1.10687	0.568306	0.0429175
P67714	NDPA_SALTY	Nucleoid-associated protein YejK OS=Salmonella typhimurium (strain LT2 / SGSC1412 / ATCC 700720) GN=yejK PE=3 SV=2	0.0324676		0.0432079	0.0378378	0.00759454		0.0324461	0.035685		0.0340656	0.00229023	1.11073	0.570538	0.0432347		0.0132885		0.0132885		0.390086
Q8ZL72	Q8ZL72_SALTY	Aldehyde dehydrogenase B OS=Salmonella typhimurium (strain LT2 / SGSC1412 / ATCC 700720) GN=aldB PE=3 SV=1	0.0707575	0.0423559	0.0678522	0.0603219	0.0156267	0.0507745	0.0490926	0.0517764	0.0702357	0.0554698	0.00990602	1.08747	0.633238	0.0443975
P77980	AROB_SALTY	3-dehydroquinate synthase OS=Salmonella typhimurium (strain LT2 / SGSC1412 / ATCC 700720) GN=aroB PE=3 SV=1	0.0505091	0.0193332	0.0287137	0.032852	0.0159946	0.0395326	0.0200669	0.0118345	0.037982	0.027354	0.0136043	1.20099	0.64303	0.044926	0.017057			0.017057		0.623564
Q8ZRS0	Q8ZRS0_SALTY	Carbonic anhydrase OS=Salmonella typhimurium (strain LT2 / SGSC1412 / ATCC 700720) GN=yadF PE=1 SV=1	0.066489	0.083902	0.054576	0.0683223	0.0147487		0.0397849	0.0717806	0.0733466	0.0616374	0.018941	1.10846	0.654781	0.0450317		0.0172874		0.0172874		0.28047
P64068	ENGB_SALTY	Probable GTP-binding protein EngB OS=Salmonella typhimurium (strain LT2 / SGSC1412 / ATCC 700720) GN=engB PE=3 SV=1	0.0173164	0.0209831		0.0191498	0.00259278		0.0216819	0.0188568		0.0202694	0.00199763	0.944765	0.676353	0.0451374	0.0110634			0.0110634		0.545817
Q8ZRD4	Q8ZRD4_SALTY	Riboflavin biosynthesis protein RibD OS=Salmonella typhimurium (strain LT2 / SGSC1412 / ATCC 700720) GN=ribD PE=3 SV=1	0.0259988		0.0209372	0.023468	0.00357913	0.0214842	0.0241392			0.0228117	0.00187733	1.02877	0.839707	0.0475687
P14846	CARB_SALTY	Carbamoyl-phosphate synthase large chain OS=Salmonella typhimurium (strain LT2 / SGSC1412 / ATCC 700720) GN=carB PE=3 SV=4	0.202479	0.0142077	0.166005	0.127564	0.0998489	0.125469	0.154282	0.134892	0.121793	0.134109	0.0145361	0.951196	0.898934	0.0484144
Q7CQM5	Q7CQM5_SALTY	Secretion system regulator: transcriptonal activator OS=Salmonella typhimurium (strain LT2 / SGSC1412 / ATCC 700720) GN=ssrB PE=4 SV=1	0.0321936	0.0286294	0.0310466	0.0306232	0.00181948	0.0389601	0.0204951			0.0297276	0.0130567	1.03013	0.906475	0.0485201		0.0224749		0.0224749		0.756028
Q8ZQC7	Q8ZQC7_SALTY	Putative cytoplasmic protein OS=Salmonella typhimurium (strain LT2 / SGSC1412 / ATCC 700720) GN=ycaO PE=4 SV=1		0.0756753	0.0421086	0.0588919	0.0237352		0.0733992	0.0398409		0.0566201	0.0237293	1.04013	0.932464	0.0487315
Q8ZMM1	Q8ZMM1_SALTY	4-aminobutyrate aminotransferase OS=Salmonella typhimurium (strain LT2 / SGSC1412 / ATCC 700720) GN=gabT PE=3 SV=1	0.0236866		0.0423522	0.0330194	0.0131985		0.0218634	0.0457593		0.0338114	0.016897	0.976578	0.963089	0.0494715
P26977	PUR2_SALTY	Phosphoribosylamine--glycine ligase OS=Salmonella typhimurium (strain LT2 / SGSC1412 / ATCC 700720) GN=purD PE=3 SV=1	0.0459081		0.0465777	0.0462429	0.000473504	0.0577183	0.048916	0.0430721	0.0364233	0.0465324	0.00903646	0.993779	0.96799	0.0495772
Q8ZPU7	Q8ZPU7_SALTY	Periplasmic protein related to spheroblast formation OS=Salmonella typhimurium (strain LT2 / SGSC1412 / ATCC 700720) GN=spy PE=4 SV=1	0.0338008	0.921586	0.0504738	0.335287	0.507818		0.0203322			0.0203322		16.4904
Q7CQX6	Q7CQX6_SALTY	Putative glycosyl transferase OS=Salmonella typhimurium (strain LT2 / SGSC1412 / ATCC 700720) GN=STM0721 PE=4 SV=1	0.302206			0.302206
P74860	SSAQ_SALTY	Secretion system apparatus protein SsaQ OS=Salmonella typhimurium (strain LT2 / SGSC1412 / ATCC 700720) GN=ssaQ PE=3 SV=2	0.350892	0.183478		0.267185	0.11838
P66038	RISB_SALTY	6,7-dimethyl-8-ribityllumazine synthase OS=Salmonella typhimurium (strain LT2 / SGSC1412 / ATCC 700720) GN=ribH PE=1 SV=1	0.455656	0.0942294	0.0673385	0.205741	0.21685	0.104788				0.104788		1.96341			0.013459	0.0843831	0.052704	0.050182	0.0355292	0.478891
Q8ZLD7	USPA_SALTY	Universal stress protein A OS=Salmonella typhimurium (strain LT2 / SGSC1412 / ATCC 700720) GN=uspA PE=3 SV=3	0.0765297	0.298592	0.196926	0.190683	0.111163	0.383306				0.383306		0.497469
P0AA07	PTHP_SALTY	Phosphocarrier protein HPr OS=Salmonella typhimurium (strain LT2 / SGSC1412 / ATCC 700720) GN=ptsH PE=1 SV=1		0.187382		0.187382											0.046363	0.0745376	0.0496526	0.056851	0.0154051
Q9FA46	Q9FA46_SALTY	Tricarboxylic transport protein OS=Salmonella typhimurium (strain LT2 / SGSC1412 / ATCC 700720) GN=STM2786 PE=4 SV=1			0.184926	0.184926
P55912	PRPE_SALTY	Propionate--CoA ligase OS=Salmonella typhimurium (strain LT2 / SGSC1412 / ATCC 700720) GN=prpE PE=3 SV=2		0.168698		0.168698
Q8ZQE4	MACB_SALTY	Macrolide export ATP-binding/permease protein MacB OS=Salmonella typhimurium (strain LT2 / SGSC1412 / ATCC 700720) GN=macB PE=3 SV=1	0.156586			0.156586
P0A2D1	UCPA_SALTY	Oxidoreductase UcpA OS=Salmonella typhimurium (strain LT2 / SGSC1412 / ATCC 700720) GN=ucpA PE=3 SV=1		0.166162	0.125172	0.145667	0.0289843
Q7CPQ6	Q7CPQ6_SALTY	Putative periplasmic protein OS=Salmonella typhimurium (strain LT2 / SGSC1412 / ATCC 700720) GN=yraP PE=4 SV=1	0.142111			0.142111													0.0370815	0.0370815
P0A7X0	RS8_SALTY	30S ribosomal protein S8 OS=Salmonella typhimurium (strain LT2 / SGSC1412 / ATCC 700720) GN=rpsH PE=3 SV=2	0.132575			0.132575		0.0889523				0.0889523		1.49041				0.0560789		0.0560789		0.630438
Q8ZMM7	Q8ZMM7_SALTY	VirK-like protein OS=Salmonella typhimurium (strain LT2 / SGSC1412 / ATCC 700720) GN=virK PE=4 SV=1			0.126665	0.126665			0.0287324	0.0241371		0.0264347	0.00324932	4.7916
Q7CPB2	YJBJ_SALTY	UPF0337 protein YjbJ OS=Salmonella typhimurium (strain LT2 / SGSC1412 / ATCC 700720) GN=yjbJ PE=3 SV=1	0.118101		0.124383	0.121242	0.00444241										0.0629022	0.0202114		0.0415568	0.0301869
P06202	OPPA_SALTY	Periplasmic oligopeptide-binding protein OS=Salmonella typhimurium (strain LT2 / SGSC1412 / ATCC 700720) GN=oppA PE=1 SV=2	0.0822032	0.12072	0.155741	0.119555	0.0367825		0.0250046			0.0250046		4.78131			0.120542	0.086298	0.0924015	0.0997473	0.0182659	3.98916
Q8ZNI2	Q8ZNI2_SALTY	Putative outer membrane protein OS=Salmonella typhimurium (strain LT2 / SGSC1412 / ATCC 700720) GN=STM2245 PE=4 SV=1	0.109388	0.111592	0.13456	0.118513	0.0139403		0.0416606			0.0416606		2.84474			0.148466	0.104221	0.0473248	0.100004	0.0507023	2.40044
Q8ZNZ1	Q8ZNZ1_SALTY	Putative cytoplasmic protein OS=Salmonella typhimurium (strain LT2 / SGSC1412 / ATCC 700720) GN=STM1851 PE=4 SV=1		0.11739		0.11739												0.0884247		0.0884247
Q7CP91	Q7CP91_SALTY	Peptidyl-prolyl cis-trans isomerase OS=Salmonella typhimurium (strain LT2 / SGSC1412 / ATCC 700720) GN=fklB PE=4 SV=1	0.110222	0.151267	0.0859443	0.115811	0.0330178		0.0521039			0.0521039		2.22269			0.055659	0.145209	0.0989724	0.0999468	0.0447829	1.91822
Q8ZNS7	Q8ZNS7_SALTY	Putative porin OS=Salmonella typhimurium (strain LT2 / SGSC1412 / ATCC 700720) GN=ompS PE=3 SV=1	0.223276		0.00309967	0.113188	0.155688										0.0727969	0.059411		0.066104	0.00946529
Q7CPL6	RL18_SALTY	50S ribosomal protein L18 OS=Salmonella typhimurium (strain LT2 / SGSC1412 / ATCC 700720) GN=rplR PE=3 SV=1			0.109075	0.109075
P64046	EFPL_SALTY	Elongation factor P-like protein OS=Salmonella typhimurium (strain LT2 / SGSC1412 / ATCC 700720) GN=yeiP PE=3 SV=1			0.108209	0.108209					0.0811426	0.0811426		1.33356			0.113856	0.0827309	0.0764241	0.0910035	0.0200401	1.12153
P26983	HPF_SALTY	Ribosome hibernation promoting factor OS=Salmonella typhimurium (strain LT2 / SGSC1412 / ATCC 700720) GN=hpf PE=3 SV=1	0.0846875	0.165054	0.0603412	0.103361	0.0547971	0.0278395				0.0278395		3.71275
Q8ZPY6	Q8ZPY6_SALTY	Putative molecular chaperone (Small heat shock protein) OS=Salmonella typhimurium (strain LT2 / SGSC1412 / ATCC 700720) GN=STM1251 PE=3 SV=1	0.116778	0.0984459	0.0889565	0.101393	0.0141428										0.0493362	0.048596	0.0493296	0.0490873	0.000425441
Q8ZPY8	Q8ZPY8_SALTY	Putative periplasmic protein OS=Salmonella typhimurium (strain LT2 / SGSC1412 / ATCC 700720) GN=STM1249 PE=1 SV=1	0.123069		0.0794077	0.101238	0.0308734
Q8ZRN4	Q8ZRN4_SALTY	Modulator of Rho-dependent transcription termination OS=Salmonella typhimurium (strain LT2 / SGSC1412 / ATCC 700720) GN=rof PE=4 SV=1	0.100814			0.100814
P67605	YEEX_SALTY	UPF0265 protein YeeX OS=Salmonella typhimurium (strain LT2 / SGSC1412 / ATCC 700720) GN=yeeX PE=3 SV=1			0.097951	0.097951
P22036	ATMB_SALTY	Magnesium-transporting ATPase, P-type 1 OS=Salmonella typhimurium (strain LT2 / SGSC1412 / ATCC 700720) GN=mgtB PE=1 SV=3	0.0952478	0.0740788	0.112439	0.0939219	0.0192144
Q8ZPV0	ASTD_SALTY	N-succinylglutamate 5-semialdehyde dehydrogenase OS=Salmonella typhimurium (strain LT2 / SGSC1412 / ATCC 700720) GN=astD PE=2 SV=1	0.0901405			0.0901405
P0A1B3	ARGR_SALTY	Arginine repressor OS=Salmonella typhimurium (strain LT2 / SGSC1412 / ATCC 700720) GN=argR PE=1 SV=1			0.0880539	0.0880539												0.0598001	0.0590169	0.0594085	0.000553799
Q8ZLY2	Q8ZLY2_SALTY	Dihydroneopterin aldolase OS=Salmonella typhimurium (strain LT2 / SGSC1412 / ATCC 700720) GN=folB PE=4 SV=1	0.0863932			0.0863932			0.0216959			0.0216959		3.982			0.012161	0.0539521	0.0363207	0.0341446	0.0209804	1.57378
Q8ZML9	Q8ZML9_SALTY	Putative LysM domain protein OS=Salmonella typhimurium (strain LT2 / SGSC1412 / ATCC 700720) GN=ygaU PE=4 SV=1	0.0687828		0.08836	0.0785714	0.0138432		0.0299332			0.0299332		2.6249			0.0426622	0.0574034	0.0288213	0.0429623	0.0142934	1.43527
Q8ZML4	Q8ZML4_SALTY	Putative inner membrane protein OS=Salmonella typhimurium (strain LT2 / SGSC1412 / ATCC 700720) GN=ygaM PE=4 SV=1	0.130773	0.0432037	0.0562047	0.076727	0.0472542
P66431	RS15_SALTY	30S ribosomal protein S15 OS=Salmonella typhimurium (strain LT2 / SGSC1412 / ATCC 700720) GN=rpsO PE=3 SV=2			0.076536	0.076536			0.100428	0.130949	0.127966	0.119781	0.0168263	0.638965
Q8ZM41	Q8ZM41_SALTY	Putative cytoplasmic protein OS=Salmonella typhimurium (strain LT2 / SGSC1412 / ATCC 700720) GN=yggL PE=4 SV=1			0.0762346	0.0762346
P74852	SSAJ_SALTY	Secretion system apparatus lipoprotein SsaJ OS=Salmonella typhimurium (strain LT2 / SGSC1412 / ATCC 700720) GN=ssaJ PE=3 SV=1	0.0751764			0.0751764					0.0221371	0.0221371		3.39594				0.0589433	0.0385137	0.0487285	0.0144459	2.20121
Q7CPL3	RL23_SALTY	50S ribosomal protein L23 OS=Salmonella typhimurium (strain LT2 / SGSC1412 / ATCC 700720) GN=rplW PE=3 SV=1			0.0721371	0.0721371			0.125219			0.125219		0.576086			0.149144		0.13864	0.143892	0.00742754	1.14912
Q7CQJ1	Q7CQJ1_SALTY	Putative resistance protein OS=Salmonella typhimurium (strain LT2 / SGSC1412 / ATCC 700720) GN=osmC PE=4 SV=1			0.0716468	0.0716468											0.0202595	0.0336021	0.0175045	0.0237887	0.00860958
Q8ZRN8	Q8ZRN8_SALTY	Putative endochitinase OS=Salmonella typhimurium (strain LT2 / SGSC1412 / ATCC 700720) GN=STM0233 PE=4 SV=1		0.0712907		0.0712907
O85140	FABD_SALTY	Malonyl CoA-acyl carrier protein transacylase OS=Salmonella typhimurium (strain LT2 / SGSC1412 / ATCC 700720) GN=fabD PE=1 SV=3	0.0699239			0.0699239												0.0222481	0.0140615	0.0181548	0.00578877
P37178	PT1P_SALTY	Phosphoenolpyruvate-protein phosphotransferase PtsP OS=Salmonella typhimurium (strain LT2 / SGSC1412 / ATCC 700720) GN=ptsP PE=3 SV=2		0.0698012		0.0698012
P67286	YBJQ_SALTY	UPF0145 protein YbjQ OS=Salmonella typhimurium (strain LT2 / SGSC1412 / ATCC 700720) GN=ybjQ PE=3 SV=1	0.089788		0.0479378	0.0688629	0.0295925
Q7CQT1	Q7CQT1_SALTY	Putative cytoplasmic protein OS=Salmonella typhimurium (strain LT2 / SGSC1412 / ATCC 700720) GN=STM1078 PE=4 SV=1	0.0681296			0.0681296												0.027621		0.027621
P67091	USPF_SALTY	Universal stress protein F OS=Salmonella typhimurium (strain LT2 / SGSC1412 / ATCC 700720) GN=uspF PE=1 SV=1	0.0877014	0.0659285	0.0486452	0.067425	0.019571										0.0455112	0.113086	0.0475727	0.0687234	0.0384332
P06187	T1S_SALTY	Type-1 restriction enzyme StySJI specificity protein OS=Salmonella typhimurium (strain LT2 / SGSC1412 / ATCC 700720) GN=hsdS PE=3 SV=1		0.0661958		0.0661958
P0CL01	CSPJ_SALTY	Cold shock-like protein CspJ OS=Salmonella typhimurium (strain LT2 / SGSC1412 / ATCC 700720) GN=cspJ PE=3 SV=1		0.0863311	0.0455253	0.0659282	0.0288541		0.0287138			0.0287138		2.29604			0.020266	0.0333222	0.0521133	0.0352338	0.0160095	1.22707
Q8ZQQ8	Q8ZQQ8_SALTY	Putative phospholipid-binding protein OS=Salmonella typhimurium (strain LT2 / SGSC1412 / ATCC 700720) GN=ybhB PE=4 SV=1	0.0455122	0.0861478		0.06583	0.0287337										0.10292	0.088097	0.086742	0.0925865	0.00897509
P66950	BEPA_SALTY	Beta-barrel assembly-enhancing protease OS=Salmonella typhimurium (strain LT2 / SGSC1412 / ATCC 700720) GN=bepA PE=3 SV=1		0.0656382		0.0656382				0.0307835		0.0307835		2.13225					0.0228263	0.0228263		0.74151
Q8ZQ41	Q8ZQ41_SALTY	Putative cytoplasmic protein OS=Salmonella typhimurium (strain LT2 / SGSC1412 / ATCC 700720) GN=yccJ PE=4 SV=1	0.039857	0.0933968	0.0626788	0.0653109	0.0268668											0.0204009	0.0202956	0.0203483	7.44496e-05
P35672	INVG_SALTY	Protein InvG OS=Salmonella typhimurium (strain LT2 / SGSC1412 / ATCC 700720) GN=invG PE=1 SV=3	0.0648668			0.0648668
H9L479	H9L479_SALTY	Outer membrane N-acetyl phenylalanine beta-naphthyl ester-cleaving esterase OS=Salmonella typhimurium (strain LT2 / SGSC1412 / ATCC 700720) GN=apeE PE=4 SV=1	0.0532239	0.0661729	0.074876	0.0647576	0.0108952		0.0587587			0.0587587		1.10209			0.0526516	0.0577583	0.0558079	0.0554059	0.00257701	0.942939
Q8ZR41	GCS2_SALTY	Putative glutamate--cysteine ligase 2 OS=Salmonella typhimurium (strain LT2 / SGSC1412 / ATCC 700720) GN=ybdK PE=1 SV=1	0.0623391			0.0623391
Q8ZPG1	Q8ZPG1_SALTY	S-adenosylmethionine:tRNA ribosyltransferase-isomerase OS=Salmonella typhimurium (strain LT2 / SGSC1412 / ATCC 700720) GN=STM1548 PE=4 SV=1	0.0908957	0.043937	0.0520369	0.0622899	0.0251022		0.0521224			0.0521224		1.19507
Q8ZLR6	Q8ZLR6_SALTY	Sigma cross-reacting protein 27A (SCRP-27A) OS=Salmonella typhimurium (strain LT2 / SGSC1412 / ATCC 700720) GN=yhbL PE=4 SV=1	0.0732368		0.0482267	0.0607318	0.0176848		0.0253676			0.0253676		2.39407
Q8ZRC1	Q8ZRC1_SALTY	Putative lipoprotein OS=Salmonella typhimurium (strain LT2 / SGSC1412 / ATCC 700720) GN=yajG PE=4 SV=1	0.0600937			0.0600937												0.0482733		0.0482733
Q8ZKM4	Q8ZKM4_SALTY	Putative pyruvate formate lyase II OS=Salmonella typhimurium (strain LT2 / SGSC1412 / ATCC 700720) GN=pflD PE=4 SV=1	0.0831238	0.0369096		0.0600167	0.0326784		0.00933532			0.00933532		6.42899
Q7CR61	Q7CR61_SALTY	Outer membrane lipoprotein RcsF OS=Salmonella typhimurium (strain LT2 / SGSC1412 / ATCC 700720) GN=rcsF PE=3 SV=1	0.0602557		0.0586766	0.0594662	0.00111663											0.0696828		0.0696828
Q8ZLZ8	Q8ZLZ8_SALTY	NADPH specific quinone oxidoreductase OS=Salmonella typhimurium (strain LT2 / SGSC1412 / ATCC 700720) GN=mdaB PE=4 SV=1			0.0583658	0.0583658													0.0212468	0.0212468
Q8ZNB2	MNMC_SALTY	tRNA 5-methylaminomethyl-2-thiouridine biosynthesis bifunctional protein MnmC OS=Salmonella typhimurium (strain LT2 / SGSC1412 / ATCC 700720) GN=mnmC PE=3 SV=2		0.0581677		0.0581677
Q8ZR03	LIPB_SALTY	Octanoyltransferase OS=Salmonella typhimurium (strain LT2 / SGSC1412 / ATCC 700720) GN=lipB PE=3 SV=2			0.0577381	0.0577381
O68901	SODC_SALTY	Superoxide dismutase [Cu-Zn] 2 OS=Salmonella typhimurium (strain LT2 / SGSC1412 / ATCC 700720) GN=sodC PE=3 SV=1	0.0471427	0.073949	0.0511499	0.0574139	0.0144593											0.0158129	0.0172567	0.0165348	0.00102087
Q7CQX1	Q7CQX1_SALTY	Tol protein, membrane-spanning inner membrane protein OS=Salmonella typhimurium (strain LT2 / SGSC1412 / ATCC 700720) GN=tolQ PE=3 SV=1			0.056912	0.056912
Q7CQF9	Q7CQF9_SALTY	Putative cytoplasmic protein OS=Salmonella typhimurium (strain LT2 / SGSC1412 / ATCC 700720) GN=yciF PE=4 SV=1	0.0580856	0.0537068	0.0582675	0.0566866	0.00258221
Q8ZQE0	Q8ZQE0_SALTY	Homolog of slsA in STM OS=Salmonella typhimurium (strain LT2 / SGSC1412 / ATCC 700720) GN=STM0950 PE=4 SV=1	0.0591247	0.0513846		0.0552547	0.00547305		0.0197972			0.0197972		2.79104				0.0299087	0.0209628	0.0254357	0.00632567	1.28482
Q8ZM06	DKGA_SALTY	2,5-diketo-D-gluconic acid reductase A OS=Salmonella typhimurium (strain LT2 / SGSC1412 / ATCC 700720) GN=dkgA PE=3 SV=1	0.0527344	0.0507812	0.0616107	0.0550421	0.00577181				0.0193186	0.0193186		2.84917			0.0169246	0.01994		0.0184323	0.00213225	0.95412
Q7CPK9	Q7CPK9_SALTY	Phosphoribulokinase OS=Salmonella typhimurium (strain LT2 / SGSC1412 / ATCC 700720) GN=prkB PE=3 SV=1	0.0508232		0.0586563	0.0547397	0.00553883		0.018466			0.018466		2.96435			0.126979	0.0714105	0.103657	0.100682	0.0279034	5.45229
Q8ZRQ3	Q8ZRQ3_SALTY	Penicillin-binding protein 1B OS=Salmonella typhimurium (strain LT2 / SGSC1412 / ATCC 700720) GN=mrcB PE=3 SV=1			0.05469	0.05469			0.0220404			0.0220404		2.48136				0.0339985	0.0197623	0.0268804	0.0100665	1.2196
O68926	BFR_SALTY	Bacterioferritin OS=Salmonella typhimurium (strain LT2 / SGSC1412 / ATCC 700720) GN=bfr PE=3 SV=1	0.0416312	0.0611773	0.0612485	0.0546857	0.0113055											0.00710741		0.00710741
Q8ZP02	Q8ZP02_SALTY	Mannose-specific enzyme IID OS=Salmonella typhimurium (strain LT2 / SGSC1412 / ATCC 700720) GN=manZ PE=4 SV=1	0.0561743	0.0808237	0.0241368	0.0537116	0.0284236				0.0438591	0.0438591		1.22464
Q8ZNK2	Q8ZNK2_SALTY	Putative permease OS=Salmonella typhimurium (strain LT2 / SGSC1412 / ATCC 700720) GN=yeiU PE=4 SV=1	0.0534795			0.0534795
Q7CPH6	Q7CPH6_SALTY	Putative rhodanese-related sulfurtransferases OS=Salmonella typhimurium (strain LT2 / SGSC1412 / ATCC 700720) GN=yibN PE=4 SV=1	0.0519208			0.0519208												0.0490515		0.0490515
Q8ZKM8	FSA_SALTY	Fructose-6-phosphate aldolase OS=Salmonella typhimurium (strain LT2 / SGSC1412 / ATCC 700720) GN=fsa PE=3 SV=1	0.0281941	0.075492		0.051843	0.0334447	0.0204848				0.0204848		2.53081				0.101715	0.0988997	0.100307	0.00199074	4.89668
P74861	TYRB_SALTY	Aromatic-amino-acid aminotransferase OS=Salmonella typhimurium (strain LT2 / SGSC1412 / ATCC 700720) GN=tyrB PE=3 SV=3	0.0517738			0.0517738			0.216363	0.0437078	0.0204899	0.0935202	0.107017	0.553611
P0A8B8	YBAB_SALTY	Nucleoid-associated protein YbaB OS=Salmonella typhimurium (strain LT2 / SGSC1412 / ATCC 700720) GN=ybaB PE=3 SV=1	0.0515683			0.0515683											0.00895199			0.00895199
Q9RF52	PEPB_SALTY	Peptidase B OS=Salmonella typhimurium (strain LT2 / SGSC1412 / ATCC 700720) GN=pepB PE=1 SV=1	0.0514798			0.0514798			0.0561711	0.068879	0.0473056	0.0574519	0.0108435	0.89605
Q8ZQ03	Q8ZQ03_SALTY	Putative outer membrane protein OS=Salmonella typhimurium (strain LT2 / SGSC1412 / ATCC 700720) GN=ycfR PE=4 SV=1			0.0506518	0.0506518													0.061555	0.061555
Q8ZR06	PAGP_SALTY	Lipid A palmitoyltransferase PagP OS=Salmonella typhimurium (strain LT2 / SGSC1412 / ATCC 700720) GN=pagP PE=1 SV=1	0.0548311		0.045494	0.0501626	0.00660231		0.0399223			0.0399223		1.25651			0.0566644	0.0421163	0.0963917	0.0650575	0.0280942	1.6296
Q7CQG2	Q7CQG2_SALTY	Putative oxoacyl-(Acyl carrier protein) reductase OS=Salmonella typhimurium (strain LT2 / SGSC1412 / ATCC 700720) GN=yciK PE=1 SV=1	0.0792044		0.0201236	0.049664	0.0417764		0.0518432			0.0518432		0.957966				0.0131671		0.0131671		0.25398
Q9L4T0	LUXS_SALTY	S-ribosylhomocysteine lyase OS=Salmonella typhimurium (strain LT2 / SGSC1412 / ATCC 700720) GN=luxS PE=3 SV=3	0.0460702	0.050468	0.0524039	0.0496473	0.00324562		0.0380491			0.0380491		1.30482				0.0160075		0.0160075		0.420705
Q8ZR37	Q8ZR37_SALTY	Enterobactin synthetase, component F (Nonribosomal peptide synthetase) OS=Salmonella typhimurium (strain LT2 / SGSC1412 / ATCC 700720) GN=entF PE=4 SV=1		0.0494903		0.0494903			0.238915	0.0524062	0.0549122	0.115411	0.106965	0.428817
Q7CPC7	Q7CPC7_SALTY	Putative acetyltransferase OS=Salmonella typhimurium (strain LT2 / SGSC1412 / ATCC 700720) GN=yiiD PE=4 SV=1	0.0593102	0.0391477	0.049045	0.0491676	0.0100818		0.0835026			0.0835026		0.588815			0.0418879	0.0409659	0.0479378	0.0435972	0.00378722	0.522106
P0A2F4	SODF_SALTY	Superoxide dismutase [Fe] OS=Salmonella typhimurium (strain LT2 / SGSC1412 / ATCC 700720) GN=sodB PE=3 SV=2	0.0479329			0.0479329												0.0473156		0.0473156
Q8ZN83	TALA_SALTY	Transaldolase A OS=Salmonella typhimurium (strain LT2 / SGSC1412 / ATCC 700720) GN=talA PE=3 SV=1	0.0505977		0.0446961	0.0476469	0.00417304				0.0237262	0.0237262		2.0082
P0A2R8	CORA_SALTY	Magnesium transport protein CorA OS=Salmonella typhimurium (strain LT2 / SGSC1412 / ATCC 700720) GN=corA PE=1 SV=1	0.0340063		0.0605692	0.0472877	0.0187828											0.0283537	0.0282542	0.028304	7.03778e-05
P0A7N6	RL32_SALTY	50S ribosomal protein L32 OS=Salmonella typhimurium (strain LT2 / SGSC1412 / ATCC 700720) GN=rpmF PE=3 SV=2			0.0467027	0.0467027											0.0887769	0.0767293	0.114001	0.0931692	0.0190203
Q8ZPT7	Q8ZPT7_SALTY	Putative enzyme OS=Salmonella typhimurium (strain LT2 / SGSC1412 / ATCC 700720) GN=yniC PE=4 SV=1	0.0459231			0.0459231
P0A271	HSLV_SALTY	ATP-dependent protease subunit HslV OS=Salmonella typhimurium (strain LT2 / SGSC1412 / ATCC 700720) GN=hslV PE=3 SV=2		0.0459231		0.0459231			0.13368		0.0743898	0.104035	0.0419243	0.44142			0.187796			0.187796		1.80512
Q8ZJX1	Q8ZJX1_SALTY	Transcriptional regulator (Activator) of bgl operon OS=Salmonella typhimurium (strain LT2 / SGSC1412 / ATCC 700720) GN=bglJ PE=4 SV=1		0.0452967		0.0452967
P66131	RL27_SALTY	50S ribosomal protein L27 OS=Salmonella typhimurium (strain LT2 / SGSC1412 / ATCC 700720) GN=rpmA PE=3 SV=2			0.0448429	0.0448429
Q8ZN86	Q8ZN86_SALTY	Putative outer membrane lipoprotein OS=Salmonella typhimurium (strain LT2 / SGSC1412 / ATCC 700720) GN=STM2447 PE=4 SV=1	0.0473048		0.0413684	0.0443366	0.00419763				0.0249615	0.0249615		1.7762			0.0625304			0.0625304		2.50507
Q7CPT7	Q7CPT7_SALTY	Periplasmic L-asparaginase II OS=Salmonella typhimurium (strain LT2 / SGSC1412 / ATCC 700720) GN=ansB PE=3 SV=1	0.0525874	0.0450828	0.0352347	0.0443016	0.0087027		0.0065827			0.0065827		6.73002				0.0185814	0.0113344	0.0149579	0.00512444	2.27231
Q8ZNN5	Q8ZNN5_SALTY	Putative ATP-binding protein OS=Salmonella typhimurium (strain LT2 / SGSC1412 / ATCC 700720) GN=mrp PE=4 SV=1	0.0299099	0.0315549	0.0695012	0.0436553	0.0223983		0.035294			0.035294		1.2369			0.0280133	0.0312845	0.0308363	0.0300447	0.00177346	0.85127
Q8ZNP4	Q8ZNP4_SALTY	Putative cytoplasmic protein OS=Salmonella typhimurium (strain LT2 / SGSC1412 / ATCC 700720) GN=STM2137 PE=4 SV=1		0.0434176		0.0434176
Q8ZND0	Q8ZND0_SALTY	Putative glutathione-S-transferase OS=Salmonella typhimurium (strain LT2 / SGSC1412 / ATCC 700720) GN=yfcF PE=4 SV=1		0.0429669		0.0429669					0.0373747	0.0373747		1.14963
P24518	NADR_SALTY	Trifunctional NAD biosynthesis/regulator protein NadR OS=Salmonella typhimurium (strain LT2 / SGSC1412 / ATCC 700720) GN=nadR PE=1 SV=2	0.0426202			0.0426202					0.0242171	0.0242171		1.75992
Q7CPH7	Q7CPH7_SALTY	Glutaredoxin 3 OS=Salmonella typhimurium (strain LT2 / SGSC1412 / ATCC 700720) GN=grxC PE=4 SV=1	0.0425718			0.0425718
P0A2F2	NPD_SALTY	NAD-dependent protein deacylase OS=Salmonella typhimurium (strain LT2 / SGSC1412 / ATCC 700720) GN=cobB PE=1 SV=2	0.0480699	0.0411872	0.0372366	0.0421646	0.00548242		0.0280435			0.0280435		1.50354			0.0122958	0.0287169	0.0235046	0.0215058	0.00839107	0.766872
Q8ZRM2	GLO2_SALTY	Hydroxyacylglutathione hydrolase OS=Salmonella typhimurium (strain LT2 / SGSC1412 / ATCC 700720) GN=gloB PE=1 SV=1	0.0419436			0.0419436			0.0125095		0.0246317	0.0185706	0.00857169	2.2586
P0A269	PPX_SALTY	Exopolyphosphatase OS=Salmonella typhimurium (strain LT2 / SGSC1412 / ATCC 700720) GN=ppx PE=3 SV=2		0.041867		0.041867
Q8ZQD4	LOLA_SALTY	Outer-membrane lipoprotein carrier protein OS=Salmonella typhimurium (strain LT2 / SGSC1412 / ATCC 700720) GN=lolA PE=3 SV=2	0.0391319		0.0445821	0.041857	0.00385386		0.0403946			0.0403946		1.0362			0.0428248	0.0474179	0.0396975	0.0433134	0.00388333	1.07226
Q8ZNG2	SSEL_SALTY	Deubiquitinase SseL OS=Salmonella typhimurium (strain LT2 / SGSC1412 / ATCC 700720) GN=sseL PE=1 SV=2			0.0415277	0.0415277				0.0625963	0.0643063	0.0634513	0.00120914	0.654482
P0A7S6	RS12_SALTY	30S ribosomal protein S12 OS=Salmonella typhimurium (strain LT2 / SGSC1412 / ATCC 700720) GN=rpsL PE=3 SV=2			0.0412591	0.0412591
P66193	RL31B_SALTY	50S ribosomal protein L31 type B OS=Salmonella typhimurium (strain LT2 / SGSC1412 / ATCC 700720) GN=rpmE2 PE=3 SV=1			0.0412326	0.0412326		0.00963558	0.0439293		0.0489342	0.0341664	0.0213912	1.20682			0.0528076			0.0528076		1.5456
Q8ZMZ1	Q8ZMZ1_SALTY	Gifsy-1 prophage protein OS=Salmonella typhimurium (strain LT2 / SGSC1412 / ATCC 700720) GN=STM2610 PE=1 SV=1	0.0248929	0.068854	0.0291493	0.0409654	0.0242458		0.0333396			0.0333396		1.22873
Q8ZK65	Q8ZK65_SALTY	Putative transcriptional regulator OS=Salmonella typhimurium (strain LT2 / SGSC1412 / ATCC 700720) GN=STM4417 PE=4 SV=1	0.0510788	0.029546	0.0420461	0.0408903	0.0108128		0.0466588			0.0466588		0.876368				0.0135735	0.0161303	0.0148519	0.00180794	0.318308
Q7CQ27	Q7CQ27_SALTY	Putative iron-dependent peroxidase OS=Salmonella typhimurium (strain LT2 / SGSC1412 / ATCC 700720) GN=STM2446 PE=4 SV=1	0.0405921			0.0405921			0.0181311			0.0181311		2.23881
Q7CPU8	Q7CPU8_SALTY	Putative periplasmic immunogenic protein OS=Salmonella typhimurium (strain LT2 / SGSC1412 / ATCC 700720) GN=yggE PE=4 SV=1	0.0324877	0.0425927	0.0436842	0.0395882	0.00617338		0.0185312			0.0185312		2.1363			0.0549662	0.0581547	0.0517329	0.0549513	0.00321092	2.96534
Q8ZNX1	Q8ZNX1_SALTY	Similar Cu resistance protein CopC OS=Salmonella typhimurium (strain LT2 / SGSC1412 / ATCC 700720) GN=yobA PE=4 SV=1	0.0396899	0.0388956		0.0392927	0.000561669		0.0415768			0.0415768		0.945064			0.0608617	0.0249534	0.0387491	0.0415214	0.018114	0.998667
Q7CR27	Q7CR27_SALTY	Cytochrome o ubiquinol oxidase subunit I OS=Salmonella typhimurium (strain LT2 / SGSC1412 / ATCC 700720) GN=cyoB PE=3 SV=1		0.0240691	0.051	0.0375346	0.019043		0.0493253			0.0493253		0.760961
Q93IM5	GLK_SALTY	Glucokinase OS=Salmonella typhimurium (strain LT2 / SGSC1412 / ATCC 700720) GN=glk PE=3 SV=1			0.0374958	0.0374958			0.0452906	0.0443981		0.0448444	0.000631057	0.836132				0.0427172		0.0427172		0.952566
P36556	BASR_SALTY	Transcriptional regulatory protein BasR OS=Salmonella typhimurium (strain LT2 / SGSC1412 / ATCC 700720) GN=basR PE=1 SV=1			0.0367338	0.0367338
Q7CR39	Q7CR39_SALTY	Protein-export membrane protein SecF OS=Salmonella typhimurium (strain LT2 / SGSC1412 / ATCC 700720) GN=secF PE=3 SV=1	0.0366627			0.0366627												0.0345139		0.0345139
P64105	FABA_SALTY	3-hydroxydecanoyl-[acyl-carrier-protein] dehydratase OS=Salmonella typhimurium (strain LT2 / SGSC1412 / ATCC 700720) GN=fabA PE=3 SV=2	0.0445415		0.0280813	0.0363114	0.0116392		0.0568505			0.0568505		0.638717
Q7CR55	Q7CR55_SALTY	Homology to Shigella VirG protein OS=Salmonella typhimurium (strain LT2 / SGSC1412 / ATCC 700720) GN=STM0307 PE=4 SV=1	0.0423947	0.0301953		0.036295	0.00862631											0.0618177		0.0618177
P66409	RS14_SALTY	30S ribosomal protein S14 OS=Salmonella typhimurium (strain LT2 / SGSC1412 / ATCC 700720) GN=rpsN PE=3 SV=2	0.0392355		0.0332812	0.0362583	0.00421032		0.0625047			0.0625047		0.58009
Q7CPH3	Q7CPH3_SALTY	Putative stress-induced protein OS=Salmonella typhimurium (strain LT2 / SGSC1412 / ATCC 700720) GN=yicC PE=4 SV=1	0.0319197		0.0401707	0.0360452	0.00583439		0.0418004			0.0418004		0.862317			0.0267088		0.0336422	0.0301755	0.00490269	0.721896
Q8ZP37	Q8ZP37_SALTY	Nitrate reductase 1, alpha subunit OS=Salmonella typhimurium (strain LT2 / SGSC1412 / ATCC 700720) GN=narG PE=4 SV=1	0.0360161			0.0360161
Q7CQ43	Q7CQ43_SALTY	Phosphoesterase OS=Salmonella typhimurium (strain LT2 / SGSC1412 / ATCC 700720) GN=yfcE PE=3 SV=1	0.0384854		0.0333515	0.0359184	0.00363021											0.0326363		0.0326363
Q7CQJ0	SRA_SALTY	Stationary-phase-induced ribosome-associated protein OS=Salmonella typhimurium (strain LT2 / SGSC1412 / ATCC 700720) GN=sra PE=3 SV=1			0.0358234	0.0358234				0.023582	0.0371127	0.0303474	0.00956767	1.18044
Q7CPN9	Q7CPN9_SALTY	Putative ABC superfamily transport protein OS=Salmonella typhimurium (strain LT2 / SGSC1412 / ATCC 700720) GN=yhbG PE=3 SV=1	0.0279986	0.040408	0.0378628	0.0354231	0.00655455		0.0302541			0.0302541		1.17085			0.0114913	0.0341453	0.0142256	0.0199541	0.0123658	0.659549
P0A1R4	HIS5_SALTY	Imidazole glycerol phosphate synthase subunit HisH OS=Salmonella typhimurium (strain LT2 / SGSC1412 / ATCC 700720) GN=hisH PE=3 SV=1	0.0352409			0.0352409					0.0322815	0.0322815		1.09168				0.0280924		0.0280924		0.870232
P0A1Y6	NUOCD_SALTY	NADH-quinone oxidoreductase subunit C/D OS=Salmonella typhimurium (strain LT2 / SGSC1412 / ATCC 700720) GN=nuoC PE=3 SV=2	0.0352409			0.0352409				0.028813		0.028813		1.22309					0.00749943	0.00749943		0.260279
Q7CQ26	Q7CQ26_SALTY	Putative cytoplasmic protein OS=Salmonella typhimurium (strain LT2 / SGSC1412 / ATCC 700720) GN=STM2475 PE=4 SV=1		0.0345874	0.0358156	0.0352015	0.000868431										0.0302831	0.0402287	0.0377274	0.0360797	0.00517347
Q8ZM84	Q8ZM84_SALTY	Putative inner membrane protein OS=Salmonella typhimurium (strain LT2 / SGSC1412 / ATCC 700720) GN=STM3036 PE=4 SV=1	0.0358975		0.0342353	0.0350664	0.00117536		0.0392639			0.0392639		0.893094			0.0506903	0.0768929	0.0679308	0.0651714	0.0133175	1.65983
Q7CP99	Q7CP99_SALTY	Putative entericidin B OS=Salmonella typhimurium (strain LT2 / SGSC1412 / ATCC 700720) GN=ecnB PE=4 SV=1	0.0350455			0.0350455
P0A1X8	MSCL_SALTY	Large-conductance mechanosensitive channel OS=Salmonella typhimurium (strain LT2 / SGSC1412 / ATCC 700720) GN=mscL PE=3 SV=1	0.0345008			0.0345008													0.0196711	0.0196711
Q8ZQF1	Q8ZQF1_SALTY	L-allo-threonine aldolase OS=Salmonella typhimurium (strain LT2 / SGSC1412 / ATCC 700720) GN=ltaA PE=4 SV=1			0.0340901	0.0340901			0.0176146		0.0250954	0.021355	0.00528972	1.59635				0.0201518		0.0201518		0.943657
Q8ZQG3	Q8ZQG3_SALTY	Putative Fels-1 prophage minor tail protein OS=Salmonella typhimurium (strain LT2 / SGSC1412 / ATCC 700720) GN=STM0918 PE=4 SV=1	0.0342018	0.0338694		0.0340356	0.000235024
Q8ZNZ2	RSMF_SALTY	Ribosomal RNA small subunit methyltransferase F OS=Salmonella typhimurium (strain LT2 / SGSC1412 / ATCC 700720) GN=rsmF PE=3 SV=1		0.0338541		0.0338541
P61351	YCEI_SALTY	Protein YceI OS=Salmonella typhimurium (strain LT2 / SGSC1412 / ATCC 700720) GN=yceI PE=3 SV=1			0.0338465	0.0338465		0.0243902				0.0243902		1.38771			0.0592575			0.0592575		2.42957
Q7CP64	Q7CP64_SALTY	Protein CreA OS=Salmonella typhimurium (strain LT2 / SGSC1412 / ATCC 700720) GN=creA PE=4 SV=1	0.0331543	0.0390254	0.0293102	0.03383	0.00489275										0.0606862	0.095553	0.0981486	0.0847959	0.02092
P67366	YCFP_SALTY	UPF0227 protein YcfP OS=Salmonella typhimurium (strain LT2 / SGSC1412 / ATCC 700720) GN=ycfP PE=3 SV=1	0.0338008			0.0338008			0.0296819			0.0296819		1.13877				0.0176219		0.0176219		0.593692
Q8ZQZ6	SYL_SALTY	Leucine--tRNA ligase OS=Salmonella typhimurium (strain LT2 / SGSC1412 / ATCC 700720) GN=leuS PE=3 SV=1	0.0337123			0.0337123			0.0806873	0.0958772	0.0826249	0.0863965	0.00826751	0.390204
Q8ZPI6	Q8ZPI6_SALTY	Putative periplasmic protein OS=Salmonella typhimurium (strain LT2 / SGSC1412 / ATCC 700720) GN=ydeI PE=1 SV=1	0.0329872		0.034012	0.0334996	0.000724632
Q8ZPL3	Q8ZPL3_SALTY	Response regulator in two-component regulatory system with RstB (OmpR family) OS=Salmonella typhimurium (strain LT2 / SGSC1412 / ATCC 700720) GN=rstA PE=4 SV=1	0.0332512			0.0332512			0.0226174			0.0226174		1.47016
P19480	AHPF_SALTY	Alkyl hydroperoxide reductase subunit F OS=Salmonella typhimurium (strain LT2 / SGSC1412 / ATCC 700720) GN=ahpF PE=1 SV=1	0.0325846		0.0325441	0.0325644	2.85935e-05		0.0284671			0.0284671		1.14393				0.0666788		0.0666788		2.34231
P58688	FOLD_SALTY	Bifunctional protein FolD OS=Salmonella typhimurium (strain LT2 / SGSC1412 / ATCC 700720) GN=folD PE=3 SV=2	0.0323557			0.0323557			0.0280901			0.0280901		1.15185
Q8ZQU1	Q8ZQU1_SALTY	2-oxoglutarate dehydrogenase decarboxylase component OS=Salmonella typhimurium (strain LT2 / SGSC1412 / ATCC 700720) GN=sucA PE=4 SV=1	0.0322137			0.0322137			0.0639942	0.0606599	0.0733952	0.0660164	0.00660406	0.487965
Q7CPQ5	Q7CPQ5_SALTY	Putative intracellular proteinase OS=Salmonella typhimurium (strain LT2 / SGSC1412 / ATCC 700720) GN=yhbO PE=4 SV=1			0.0321616	0.0321616
Q93GL4	Q93GL4_SALTY	Conjugative transfer: oriT nicking-unwinding OS=Salmonella typhimurium (strain LT2 / SGSC1412 / ATCC 700720) GN=traI PE=4 SV=1		0.0321584		0.0321584
Q8ZP57	STEC_SALTY	Secreted effector kinase SteC OS=Salmonella typhimurium (strain LT2 / SGSC1412 / ATCC 700720) GN=steC PE=1 SV=1	0.0320166			0.0320166
Q8ZKV8	Q8ZKV8_SALTY	Ribokinase OS=Salmonella typhimurium (strain LT2 / SGSC1412 / ATCC 700720) GN=rbsK PE=3 SV=1			0.031576	0.031576
Q7CPI5	Q7CPI5_SALTY	Putative outer membrane lipoprotein OS=Salmonella typhimurium (strain LT2 / SGSC1412 / ATCC 700720) GN=yiaD PE=3 SV=1	0.0437279	0.0270634	0.0232764	0.0313559	0.0108805										0.0505426	0.102172	0.0680434	0.0735861	0.0262573
Q8ZR01	RLPA_SALTY	Rare lipoprotein A OS=Salmonella typhimurium (strain LT2 / SGSC1412 / ATCC 700720) GN=rlpA PE=3 SV=1	0.03135			0.03135											0.0293356			0.0293356
Q7CPQ0	Q7CPQ0_SALTY	Preprotein translocase IISP family protein OS=Salmonella typhimurium (strain LT2 / SGSC1412 / ATCC 700720) GN=secG PE=4 SV=1	0.0313266			0.0313266
Q9L6L9	FRE_SALTY	NAD(P)H-flavin reductase OS=Salmonella typhimurium (strain LT2 / SGSC1412 / ATCC 700720) GN=fre PE=1 SV=3	0.031223			0.031223		0.0472066				0.0472066		0.661412				0.0140957		0.0140957		0.298597
Q8ZNF3	ARNB_SALTY	UDP-4-amino-4-deoxy-L-arabinose--oxoglutarate aminotransferase OS=Salmonella typhimurium (strain LT2 / SGSC1412 / ATCC 700720) GN=arnB PE=1 SV=2			0.0309842	0.0309842			0.0416606	0.0547762	0.0232107	0.0398825	0.0158577	0.776886
Q8ZR91	Q8ZR91_SALTY	Multifunctional acyl-CoA thioesterase I also functions as protease I, lysophospholipaseL(I) OS=Salmonella typhimurium (strain LT2 / SGSC1412 / ATCC 700720) GN=tesA PE=4 SV=1	0.0309189			0.0309189												0.0202473	0.0162832	0.0182652	0.00280303
Q8ZQM1	RIMO_SALTY	Ribosomal protein S12 methylthiotransferase RimO OS=Salmonella typhimurium (strain LT2 / SGSC1412 / ATCC 700720) GN=rimO PE=3 SV=1	0.0308705			0.0308705
Q7CPD4	PEPQ_SALTY	Xaa-Pro dipeptidase OS=Salmonella typhimurium (strain LT2 / SGSC1412 / ATCC 700720) GN=pepQ PE=3 SV=1	0.0308605			0.0308605			0.0375884			0.0375884		0.821011
Q8ZRM0	Q8ZRM0_SALTY	Putative cytoplasmic protein OS=Salmonella typhimurium (strain LT2 / SGSC1412 / ATCC 700720) GN=STM0267 PE=4 SV=1		0.0306688		0.0306688
P74853	SSAK_SALTY	Secretion system apparatus protein SsaK OS=Salmonella typhimurium (strain LT2 / SGSC1412 / ATCC 700720) GN=ssaK PE=4 SV=2	0.0210604		0.0402426	0.0306515	0.0135639		0.0154832			0.0154832		1.97965
Q8ZPI8	Q8ZPI8_SALTY	Putative mannitol dehydrogenase OS=Salmonella typhimurium (strain LT2 / SGSC1412 / ATCC 700720) GN=ydfI PE=4 SV=1	0.0271566	0.0504527	0.0143131	0.0306408	0.01832		0.0159857			0.0159857		1.91677			0.0132776		0.00432934	0.00880345	0.00632735	0.550709
Q7CPS4	Q7CPS4_SALTY	Putative outer membrane protein OS=Salmonella typhimurium (strain LT2 / SGSC1412 / ATCC 700720) GN=ygiW PE=4 SV=1			0.030575	0.030575											0.0172562		0.0166858	0.016971	0.00040328
Q7CQN7	Q7CQN7_SALTY	Glutathione peroxidase OS=Salmonella typhimurium (strain LT2 / SGSC1412 / ATCC 700720) GN=btuE PE=3 SV=1			0.0304923	0.0304923			0.014478		0.0158385	0.0151582	0.000962005	2.0116
P50335	YHJJ_SALTY	Protein YhjJ OS=Salmonella typhimurium (strain LT2 / SGSC1412 / ATCC 700720) GN=yhjJ PE=3 SV=2	0.0304879	0.0246955	0.0362825	0.0304886	0.0057935		0.0129979			0.0129979		2.34566			0.0313979	0.0304546	0.0330293	0.0316272	0.00130259	2.43325
Q8ZNS9	Q8ZNS9_SALTY	Putative hydrolase OS=Salmonella typhimurium (strain LT2 / SGSC1412 / ATCC 700720) GN=yedJ PE=4 SV=1	0.0304144			0.0304144
Q8ZRZ0	SYI_SALTY	Isoleucine--tRNA ligase OS=Salmonella typhimurium (strain LT2 / SGSC1412 / ATCC 700720) GN=ileS PE=3 SV=1	0.0303025			0.0303025		0.0740014	0.0736228	0.10127	0.0765002	0.0813486	0.0133421	0.372502
Q7CR85	Q7CR85_SALTY	Thiamine-binding periplasmic protein OS=Salmonella typhimurium (strain LT2 / SGSC1412 / ATCC 700720) GN=tbpA PE=4 SV=1	0.031091	0.0205554	0.0387013	0.0301159	0.00911218										0.0449917	0.0233676	0.0265459	0.0316351	0.0116758
P0CL48	FOXA_SALTY	Ferrioxamine B receptor OS=Salmonella typhimurium (strain LT2 / SGSC1412 / ATCC 700720) GN=foxA PE=3 SV=1	0.0300869			0.0300869					0.00774687	0.00774687		3.88375			0.0289892			0.0289892		3.74205
P0A281	PTH_SALTY	Peptidyl-tRNA hydrolase OS=Salmonella typhimurium (strain LT2 / SGSC1412 / ATCC 700720) GN=pth PE=3 SV=1			0.0300613	0.0300613											0.0245141	0.0261566		0.0253353	0.0011614
P0CL51	SYR_SALTY	Arginine--tRNA ligase OS=Salmonella typhimurium (strain LT2 / SGSC1412 / ATCC 700720) GN=argS PE=3 SV=1	0.0297729			0.0297729			0.0398456	0.0472914	0.0370028	0.0413799	0.00531316	0.7195			0.00871024			0.00871024		0.210494
P10370	HISX_SALTY	Histidinol dehydrogenase OS=Salmonella typhimurium (strain LT2 / SGSC1412 / ATCC 700720) GN=hisD PE=1 SV=3	0.0297328			0.0297328			0.0559711			0.0559711		0.531217
Q8ZKY8	Q8ZKY8_SALTY	Putative hydrolase of the HAD superfamily OS=Salmonella typhimurium (strain LT2 / SGSC1412 / ATCC 700720) GN=yidA PE=4 SV=1			0.0294913	0.0294913			0.0390173	0.0279952		0.0335062	0.00779377	0.880174				0.0169652		0.0169652		0.506328
P10372	HIS4_SALTY	1-(5-phosphoribosyl)-5-[(5-phosphoribosylamino)methylideneamino] imidazole-4-carboxamide isomerase OS=Salmonella typhimurium (strain LT2 / SGSC1412 / ATCC 700720) GN=hisA PE=3 SV=2	0.0433854		0.0155592	0.0294723	0.0196761				0.0351176	0.0351176		0.839247				0.0243644		0.0243644		0.693794
Q8ZRM7	DKGB_SALTY	2,5-diketo-D-gluconic acid reductase B OS=Salmonella typhimurium (strain LT2 / SGSC1412 / ATCC 700720) GN=dkgB PE=3 SV=1	0.0449976		0.0135308	0.0292642	0.0222504				0.0208741	0.0208741		1.40194				0.0165606	0.0236135	0.0200871	0.00498714	0.962297
Q8ZL68	Q8ZL68_SALTY	Putative glutathione S-transferase OS=Salmonella typhimurium (strain LT2 / SGSC1412 / ATCC 700720) GN=yibF PE=3 SV=1	0.0465212		0.0119536	0.0292374	0.024443
P29847	CYSE_SALTY	Serine acetyltransferase OS=Salmonella typhimurium (strain LT2 / SGSC1412 / ATCC 700720) GN=cysE PE=1 SV=1			0.0290041	0.0290041		0.0691104	0.0281227	0.0838435	0.0644071	0.0613709	0.0236614	0.472603				0.0339503		0.0339503		0.553198
Q8ZM72	Q8ZM72_SALTY	Proline aminopeptidase P II OS=Salmonella typhimurium (strain LT2 / SGSC1412 / ATCC 700720) GN=pepP PE=4 SV=1	0.0284196		0.0285888	0.0285042	0.000119593		0.0187313			0.0187313		1.52174
Q8ZPU5	NADE_SALTY	NH(3)-dependent NAD(+) synthetase OS=Salmonella typhimurium (strain LT2 / SGSC1412 / ATCC 700720) GN=nadE PE=1 SV=1	0.0289793		0.0279938	0.0284865	0.000696847		0.0275827			0.0275827		1.03277					0.0176774	0.0176774		0.640885
Q8ZPA1	Q8ZPA1_SALTY	Putative ABC-type polar amino acid transport system OS=Salmonella typhimurium (strain LT2 / SGSC1412 / ATCC 700720) GN=STM1635 PE=3 SV=1	0.0282542			0.0282542
H9L4B9	H9L4B9_SALTY	Putative cytoplasmic protein OS=Salmonella typhimurium (strain LT2 / SGSC1412 / ATCC 700720) GN=rmbA PE=4 SV=1			0.028025	0.028025
P04285	OPPD_SALTY	Oligopeptide transport ATP-binding protein OppD OS=Salmonella typhimurium (strain LT2 / SGSC1412 / ATCC 700720) GN=oppD PE=3 SV=1			0.0279782	0.0279782
Q8ZMW9	Q8ZMW9_SALTY	Laccase domain protein OS=Salmonella typhimurium (strain LT2 / SGSC1412 / ATCC 700720) GN=yfiH PE=3 SV=1			0.0279313	0.0279313			0.0241437	0.0341534		0.0291485	0.00707791	0.958242
Q8ZLM0	Q8ZLM0_SALTY	Protein translocase subunit SecY OS=Salmonella typhimurium (strain LT2 / SGSC1412 / ATCC 700720) GN=secY PE=3 SV=1	0.0277146			0.0277146												0.033848		0.033848
Q56078	BGLX_SALTY	Periplasmic beta-glucosidase OS=Salmonella typhimurium (strain LT2 / SGSC1412 / ATCC 700720) GN=bglX PE=3 SV=2	0.0209718	0.0297293	0.0322287	0.0276433	0.00591127			0.0615793		0.0615793		0.448905			0.128996	0.0297105	0.0239202	0.0608756	0.0590651	0.988573
Q8ZQQ5	BIOD1_SALTY	ATP-dependent dethiobiotin synthetase BioD 1 OS=Salmonella typhimurium (strain LT2 / SGSC1412 / ATCC 700720) GN=bioD1 PE=3 SV=1	0.0194148	0.0410115	0.0219741	0.0274668	0.0117997	0.0281817				0.0281817		0.97463				0.0190746		0.0190746		0.676843
Q8ZK73	Q8ZK73_SALTY	Putative transcriptional regulator OS=Salmonella typhimurium (strain LT2 / SGSC1412 / ATCC 700720) GN=ytfJ PE=4 SV=1			0.0273317	0.0273317													0.0216949	0.0216949
Q8ZR22	Q8ZR22_SALTY	Periplasmic disulfide isomerase, thiol-disulphide oxidase OS=Salmonella typhimurium (strain LT2 / SGSC1412 / ATCC 700720) GN=dsbG PE=4 SV=1	0.0162689		0.0381954	0.0272321	0.0155044										0.0276327	0.0175642		0.0225984	0.00711947
Q7CPJ6	Q7CPJ6_SALTY	Putative ATPase involved in cell division OS=Salmonella typhimurium (strain LT2 / SGSC1412 / ATCC 700720) GN=ftsE PE=3 SV=1	0.0338543		0.0203157	0.027085	0.00957323		0.0206069			0.0206069		1.31436			0.0216308	0.0523136	0.0291406	0.0343616	0.0159939	1.66748
Q8ZPQ3	Q8ZPQ3_SALTY	Putative transport protein OS=Salmonella typhimurium (strain LT2 / SGSC1412 / ATCC 700720) GN=sufC PE=3 SV=1	0.0131314	0.0407518		0.0269416	0.0195305		0.0451833			0.0451833		0.596273			0.032437	0.0151539		0.0237954	0.012221	0.526642
P32200	LPXA_SALTY	Acyl-[acyl-carrier-protein]--UDP-N-acetylglucosamine O-acyltransferase OS=Salmonella typhimurium (strain LT2 / SGSC1412 / ATCC 700720) GN=lpxA PE=3 SV=1	0.0269411			0.0269411			0.0183497			0.0183497		1.4682
Q8ZKX1	GLMS_SALTY	Glutamine--fructose-6-phosphate aminotransferase [isomerizing] OS=Salmonella typhimurium (strain LT2 / SGSC1412 / ATCC 700720) GN=glmS PE=3 SV=3	0.026911			0.026911		0.028405	0.0490835	0.0448869	0.0309512	0.0383317	0.0101912	0.702057			0.00914705			0.00914705		0.238629
Q7CPD8	YIFE_SALTY	UPF0438 protein YifE OS=Salmonella typhimurium (strain LT2 / SGSC1412 / ATCC 700720) GN=yifE PE=3 SV=1			0.0267571	0.0267571													0.0283784	0.0283784
Q7CPR8	Q7CPR8_SALTY	Putative SH3 domain protein OS=Salmonella typhimurium (strain LT2 / SGSC1412 / ATCC 700720) GN=ygiM PE=4 SV=1		0.0256503	0.0275066	0.0265785	0.0013126										0.0590518		0.0198365	0.0394441	0.0277294
P40783	QOR_SALTY	Quinone oxidoreductase OS=Salmonella typhimurium (strain LT2 / SGSC1412 / ATCC 700720) GN=qor PE=3 SV=2			0.0262714	0.0262714
P0A1P8	GLRX1_SALTY	Glutaredoxin-1 OS=Salmonella typhimurium (strain LT2 / SGSC1412 / ATCC 700720) GN=grxA PE=3 SV=1			0.0262199	0.0262199		0.0288042				0.0288042		0.91028
Q8ZMP4	Q8ZMP4_SALTY	Putative integrase OS=Salmonella typhimurium (strain LT2 / SGSC1412 / ATCC 700720) GN=STM2760 PE=4 SV=1	0.026196			0.026196
P0A1Q2	LGUL_SALTY	Lactoylglutathione lyase OS=Salmonella typhimurium (strain LT2 / SGSC1412 / ATCC 700720) GN=gloA PE=3 SV=1			0.0261887	0.0261887
Q9F173	DPO1_SALTY	DNA polymerase I OS=Salmonella typhimurium (strain LT2 / SGSC1412 / ATCC 700720) GN=polA PE=3 SV=2			0.0260185	0.0260185			0.0300074	0.0389391	0.137403	0.0687831	0.0595939	0.378268
P64267	GNS_SALTY	Protein gns OS=Salmonella typhimurium (strain LT2 / SGSC1412 / ATCC 700720) GN=gns PE=3 SV=1	0.0258435			0.0258435												0.0421336		0.0421336
Q8ZLM7	DEF_SALTY	Peptide deformylase OS=Salmonella typhimurium (strain LT2 / SGSC1412 / ATCC 700720) GN=def PE=3 SV=1		0.0258336		0.0258336			0.0311711	0.0262092		0.0286901	0.00350855	0.900436
Q7CQQ5	Q7CQQ5_SALTY	Putative outer membrane lipoprotein OS=Salmonella typhimurium (strain LT2 / SGSC1412 / ATCC 700720) GN=STM1254 PE=4 SV=1		0.0257038		0.0257038
P37427	RIR2_SALTY	Ribonucleoside-diphosphate reductase 1 subunit beta OS=Salmonella typhimurium (strain LT2 / SGSC1412 / ATCC 700720) GN=nrdB PE=3 SV=3		0.0256503		0.0256503			0.0322506	0.0477592	0.0463542	0.0421213	0.00857713	0.608962
Q8ZQX0	Q8ZQX0_SALTY	Putative enzyme OS=Salmonella typhimurium (strain LT2 / SGSC1412 / ATCC 700720) GN=ybfF PE=4 SV=1	0.0194782		0.0317618	0.02562	0.00868579				0.0245101	0.0245101		1.04529			0.0121545			0.0121545		0.495898
Q8ZMJ3	Q8ZMJ3_SALTY	Protease involved in processing C-terminal end of HycE OS=Salmonella typhimurium (strain LT2 / SGSC1412 / ATCC 700720) GN=hycI PE=4 SV=1			0.0255515	0.0255515
P00929	TRPA_SALTY	Tryptophan synthase alpha chain OS=Salmonella typhimurium (strain LT2 / SGSC1412 / ATCC 700720) GN=trpA PE=1 SV=1	0.0207763		0.0296725	0.0252244	0.00629051	0.0822865				0.0822865		0.306544				0.0148862	0.0140004	0.0144433	0.000626335	0.175524
P37419	KBL_SALTY	2-amino-3-ketobutyrate coenzyme A ligase OS=Salmonella typhimurium (strain LT2 / SGSC1412 / ATCC 700720) GN=kbl PE=3 SV=2			0.02508	0.02508			0.0277597	0.035893	0.0317564	0.031803	0.00406685	0.788603
P21622	ILVH_SALTY	Acetolactate synthase isozyme 3 small subunit OS=Salmonella typhimurium (strain LT2 / SGSC1412 / ATCC 700720) GN=ilvH PE=3 SV=2	0.0250399			0.0250399													0.0250739	0.0250739
Q8ZKV4	Q8ZKV4_SALTY	Protein for a late step of protoheme IX synthesis OS=Salmonella typhimurium (strain LT2 / SGSC1412 / ATCC 700720) GN=hemY PE=4 SV=1			0.0248317	0.0248317			0.0329069			0.0329069		0.754605			0.0573064	0.0172261	0.0309841	0.0351722	0.0203657	1.06884
Q7CQ05	GRCA_SALTY	Autonomous glycyl radical cofactor OS=Salmonella typhimurium (strain LT2 / SGSC1412 / ATCC 700720) GN=grcA PE=3 SV=1	0.0246272			0.0246272			0.00757847			0.00757847		3.24963				0.0223013	0.0240523	0.0231768	0.00123815	3.05824
P29768	NANH_SALTY	Sialidase OS=Salmonella typhimurium (strain LT2 / SGSC1412 / ATCC 700720) GN=nanH PE=1 SV=4		0.0245809		0.0245809
P26395	RFBI_SALTY	Protein RfbI OS=Salmonella typhimurium (strain LT2 / SGSC1412 / ATCC 700720) GN=rfbI PE=3 SV=1		0.029462	0.0196723	0.0245671	0.00692231
Q8ZPM7	Q8ZPM7_SALTY	Glutathionine S-transferase OS=Salmonella typhimurium (strain LT2 / SGSC1412 / ATCC 700720) GN=gst PE=3 SV=1	0.0244902			0.0244902													0.0126498	0.0126498
Q7CQK7	SYY_SALTY	Tyrosine--tRNA ligase OS=Salmonella typhimurium (strain LT2 / SGSC1412 / ATCC 700720) GN=tyrS PE=3 SV=1	0.0244117			0.0244117		0.0502541	0.0738645	0.0811441	0.0714737	0.0691841	0.0132732	0.352851
Q7CPU9	ZAPA_SALTY	Cell division protein ZapA OS=Salmonella typhimurium (strain LT2 / SGSC1412 / ATCC 700720) GN=zapA PE=3 SV=1	0.0241477	0.024558		0.0243529	0.000290093				0.0290788	0.0290788		0.837479			0.0208305	0.0226335		0.021732	0.00127497	0.747349
Q8ZQX6	Q8ZQX6_SALTY	Sugar Specific PTS family, n-acetylglucosamine-specific enzyme IIABC OS=Salmonella typhimurium (strain LT2 / SGSC1412 / ATCC 700720) GN=nagE PE=4 SV=1			0.0242914	0.0242914
Q7CPS6	Q7CPS6_SALTY	Uptake of enterochelin OS=Salmonella typhimurium (strain LT2 / SGSC1412 / ATCC 700720) GN=exbD PE=3 SV=1			0.0241212	0.0241212		0.0571662		0.0247523		0.0409593	0.0229201	0.588907					0.0518005	0.0518005		1.26468
Q8ZPD4	Q8ZPD4_SALTY	Putative NADP-dependent oxidoreductase OS=Salmonella typhimurium (strain LT2 / SGSC1412 / ATCC 700720) GN=yncB PE=4 SV=1	0.0229916		0.0252455	0.0241186	0.00159371		0.0211514			0.0211514		1.14028
Q8ZKA6	Q8ZKA6_SALTY	Putative nucleotide-binding protein OS=Salmonella typhimurium (strain LT2 / SGSC1412 / ATCC 700720) GN=yjeE PE=4 SV=1			0.0240119	0.0240119				0.0246483		0.0246483		0.974179			0.0223578			0.0223578		0.907073
P0A1H7	EXBB_SALTY	Biopolymer transport protein ExbB OS=Salmonella typhimurium (strain LT2 / SGSC1412 / ATCC 700720) GN=exbB PE=3 SV=1	0.0239222			0.0239222												0.0314141	0.0129412	0.0221776	0.0130623
H9L461	H9L461_SALTY	Anti sigma E (Sigma 24) factor, negative regulator OS=Salmonella typhimurium (strain LT2 / SGSC1412 / ATCC 700720) GN=rseB PE=4 SV=1			0.0238713	0.0238713			0.0172842	0.0118779		0.0145811	0.00382284	1.63715
Q06399	YEDD_SALTY	Uncharacterized lipoprotein YedD OS=Salmonella typhimurium (strain LT2 / SGSC1412 / ATCC 700720) GN=yedD PE=3 SV=2	0.0238337			0.0238337
P0A2K3	SYE_SALTY	Glutamate--tRNA ligase OS=Salmonella typhimurium (strain LT2 / SGSC1412 / ATCC 700720) GN=gltX PE=3 SV=1	0.0237652			0.0237652			0.0430173	0.0198714	0.0361181	0.0330023	0.0118834	0.720107			0.0134035			0.0134035		0.406138
Q56066	MOEA_SALTY	Molybdopterin molybdenumtransferase OS=Salmonella typhimurium (strain LT2 / SGSC1412 / ATCC 700720) GN=moeA PE=3 SV=2			0.0236855	0.0236855			0.0436199	0.0385373		0.0410786	0.00359398	0.57659			0.00820131			0.00820131		0.199649
P39432	NCPP_SALTY	Non-canonical purine NTP phosphatase OS=Salmonella typhimurium (strain LT2 / SGSC1412 / ATCC 700720) GN=yjjX PE=1 SV=2			0.0236387	0.0236387
P55890	DSBC_SALTY	Thiol:disulfide interchange protein DsbC OS=Salmonella typhimurium (strain LT2 / SGSC1412 / ATCC 700720) GN=dsbC PE=1 SV=2			0.0236184	0.0236184												0.0191923		0.0191923
P60317	PROQ_SALTY	RNA chaperone ProQ OS=Salmonella typhimurium (strain LT2 / SGSC1412 / ATCC 700720) GN=proQ PE=3 SV=1			0.0234778	0.0234778			0.0269268	0.0574034	0.0464636	0.0435979	0.015439	0.538507			0.012745			0.012745		0.29233
Q7CQN8	Q7CQN8_SALTY	Putative cytoplasmic protein OS=Salmonella typhimurium (strain LT2 / SGSC1412 / ATCC 700720) GN=STM1324 PE=4 SV=1			0.0234263	0.0234263
P02915	HISP_SALTY	Histidine transport ATP-binding protein HisP OS=Salmonella typhimurium (strain LT2 / SGSC1412 / ATCC 700720) GN=hisP PE=1 SV=1			0.0233669	0.0233669				0.0282379		0.0282379		0.827504
H9L460	H9L460_SALTY	Catalase OS=Salmonella typhimurium (strain LT2 / SGSC1412 / ATCC 700720) GN=katE PE=3 SV=1			0.0232811	0.0232811			0.0105456			0.0105456		2.20766
Q7CPZ8	Q7CPZ8_SALTY	T-protein OS=Salmonella typhimurium (strain LT2 / SGSC1412 / ATCC 700720) GN=tyrA PE=4 SV=1		0.0165069	0.0299785	0.0232427	0.00952585		0.0398641			0.0398641		0.583049
Q8ZQV8	Q8ZQV8_SALTY	Putative carboxylase OS=Salmonella typhimurium (strain LT2 / SGSC1412 / ATCC 700720) GN=ybgJ PE=4 SV=1	0.0212659		0.025183	0.0232244	0.00276986		0.030052			0.030052		0.77281			0.0267791	0.0250507	0.0187611	0.0235303	0.00421972	0.782988
P15888	NFSB_SALTY	Oxygen-insensitive NAD(P)H nitroreductase OS=Salmonella typhimurium (strain LT2 / SGSC1412 / ATCC 700720) GN=nfsB PE=1 SV=1	0.0134655	0.0321813		0.0228234	0.013234		0.017033			0.017033		1.33995
Q8ZQ30	GHRA_SALTY	Glyoxylate/hydroxypyruvate reductase A OS=Salmonella typhimurium (strain LT2 / SGSC1412 / ATCC 700720) GN=ghrA PE=1 SV=1			0.0227517	0.0227517			0.0194762		0.0492026	0.0343394	0.0210197	0.662553
P66008	STHA_SALTY	Soluble pyridine nucleotide transhydrogenase OS=Salmonella typhimurium (strain LT2 / SGSC1412 / ATCC 700720) GN=sthA PE=3 SV=2	0.022325			0.022325			0.0153925			0.0153925		1.45039
P08870	PYRE_SALTY	Orotate phosphoribosyltransferase OS=Salmonella typhimurium (strain LT2 / SGSC1412 / ATCC 700720) GN=pyrE PE=1 SV=3			0.0221302	0.0221302
Q8ZQM3	GSIB_SALTY	Glutathione-binding protein GsiB OS=Salmonella typhimurium (strain LT2 / SGSC1412 / ATCC 700720) GN=gsiB PE=3 SV=1			0.0220474	0.0220474			0.0113599			0.0113599		1.94082			0.0230382	0.0153961		0.0192171	0.00540373	1.69167
Q7CP94	Q7CP94_SALTY	Ribonuclease R OS=Salmonella typhimurium (strain LT2 / SGSC1412 / ATCC 700720) GN=vacB PE=3 SV=1	0.0219809			0.0219809			0.0345915			0.0345915		0.635441
P12680	PABB_SALTY	Aminodeoxychorismate synthase component 1 OS=Salmonella typhimurium (strain LT2 / SGSC1412 / ATCC 700720) GN=pabB PE=3 SV=1			0.0219132	0.0219132			0.0223798	0.0300238	0.0249887	0.0257975	0.00388565	0.84943
Q56121	RF3_SALTY	Peptide chain release factor 3 OS=Salmonella typhimurium (strain LT2 / SGSC1412 / ATCC 700720) GN=prfC PE=3 SV=3	0.0187482	0.0250392		0.0218937	0.00444845
P60656	SPEB_SALTY	Agmatinase OS=Salmonella typhimurium (strain LT2 / SGSC1412 / ATCC 700720) GN=speB PE=3 SV=1			0.0217211	0.0217211				0.0152995		0.0152995		1.41973
P26466	LAMB_SALTY	Maltoporin OS=Salmonella typhimurium (strain LT2 / SGSC1412 / ATCC 700720) GN=lamB PE=1 SV=2			0.0216696	0.0216696
H9L4C2	H9L4C2_SALTY	Activated by transcription factor SsrB OS=Salmonella typhimurium (strain LT2 / SGSC1412 / ATCC 700720) GN=srfJ PE=3 SV=1	0.0235062		0.0193366	0.0214214	0.00294836			0.0234604		0.0234604		0.913087
Q8ZQB6	MUKE_SALTY	Chromosome partition protein MukE OS=Salmonella typhimurium (strain LT2 / SGSC1412 / ATCC 700720) GN=mukE PE=3 SV=3			0.0213994	0.0213994			0.0293466		0.0160583	0.0227024	0.00939623	0.942604				0.0144557		0.0144557		0.636748
Q7CQY1	SEQA_SALTY	Negative modulator of initiation of replication OS=Salmonella typhimurium (strain LT2 / SGSC1412 / ATCC 700720) GN=seqA PE=3 SV=1			0.0213838	0.0213838			0.0100799			0.0100799		2.12143
P37722	FRSA_SALTY	Esterase FrsA OS=Salmonella typhimurium (strain LT2 / SGSC1412 / ATCC 700720) GN=frsA PE=3 SV=2	0.0213444			0.0213444			0.0133935			0.0133935		1.59364
P26264	CYSQ_SALTY	3'(2'),5'-bisphosphate nucleotidase CysQ OS=Salmonella typhimurium (strain LT2 / SGSC1412 / ATCC 700720) GN=cysQ PE=2 SV=2			0.0209013	0.0209013
Q8ZRA7	Q8ZRA7_SALTY	RND family, acridine efflux pump OS=Salmonella typhimurium (strain LT2 / SGSC1412 / ATCC 700720) GN=acrB PE=4 SV=1			0.0208654	0.0208654			0.051052	0.0504933	0.0370514	0.0461989	0.00792691	0.451642				0.0209132		0.0209132		0.452677
Q8ZR86	ALLR_SALTY	HTH-type transcriptional repressor AllR OS=Salmonella typhimurium (strain LT2 / SGSC1412 / ATCC 700720) GN=allR PE=3 SV=1			0.0206296	0.0206296					0.0175588	0.0175588		1.17489			0.0186488		0.00800029	0.0133245	0.0075296	0.758852
Q8ZMM6	Q8ZMM6_SALTY	Putative transcription activator OS=Salmonella typhimurium (strain LT2 / SGSC1412 / ATCC 700720) GN=mig-14 PE=4 SV=1			0.0204047	0.0204047			0.0903159	0.127961	0.107415	0.108564	0.018849	0.187951
Q9RCI2	MIAB_SALTY	tRNA-2-methylthio-N(6)-dimethylallyladenosine synthase OS=Salmonella typhimurium (strain LT2 / SGSC1412 / ATCC 700720) GN=miaB PE=1 SV=1	0.0229515		0.0177188	0.0203352	0.00370008		0.0121791			0.0121791		1.66968
Q7CPJ1	Q7CPJ1_SALTY	Ribosomal RNA large subunit methyltransferase J OS=Salmonella typhimurium (strain LT2 / SGSC1412 / ATCC 700720) GN=yhiR PE=3 SV=1			0.0202595	0.0202595												0.0202268	0.0178613	0.0190441	0.00167268
Q8ZPJ6	Q8ZPJ6_SALTY	Putative dimethyl sulphoxide reductase, chain A1 OS=Salmonella typhimurium (strain LT2 / SGSC1412 / ATCC 700720) GN=STM1499 PE=4 SV=1		0.0200283		0.0200283
Q8ZP50	OMPW_SALTY	Outer membrane protein W OS=Salmonella typhimurium (strain LT2 / SGSC1412 / ATCC 700720) GN=ompW PE=3 SV=1			0.0199019	0.0199019					0.0414403	0.0414403		0.480255
Q8ZLR8	RAPZ_SALTY	RNase adapter protein RapZ OS=Salmonella typhimurium (strain LT2 / SGSC1412 / ATCC 700720) GN=rapZ PE=3 SV=1			0.0199019	0.0199019			0.0224706	0.0276744	0.0439199	0.031355	0.0111883	0.634728
Q8ZN82	Q8ZN82_SALTY	Transketolase OS=Salmonella typhimurium (strain LT2 / SGSC1412 / ATCC 700720) GN=tktB PE=3 SV=1	0.0197422		0.0197036	0.0197229	2.73234e-05		0.00965088			0.00965088		2.04364					0.0172265	0.0172265		1.78497
P0A1X6	MAP1_SALTY	Methionine aminopeptidase OS=Salmonella typhimurium (strain LT2 / SGSC1412 / ATCC 700720) GN=map PE=1 SV=2	0.0222566		0.0171801	0.0197183	0.00358959		0.0226546			0.0226546		0.870391
Q8ZPM8	PDXY_SALTY	Pyridoxamine kinase OS=Salmonella typhimurium (strain LT2 / SGSC1412 / ATCC 700720) GN=pdxY PE=3 SV=1			0.019538	0.019538
Q9L9K3	COAA_SALTY	Pantothenate kinase OS=Salmonella typhimurium (strain LT2 / SGSC1412 / ATCC 700720) GN=coaA PE=3 SV=1	0.0292149		0.00945047	0.0193327	0.0139755		0.00665488			0.00665488		2.90503			0.0105308			0.0105308		1.58241
P07691	PYRF_SALTY	Orotidine 5'-phosphate decarboxylase OS=Salmonella typhimurium (strain LT2 / SGSC1412 / ATCC 700720) GN=pyrF PE=3 SV=2	0.0133285		0.0246599	0.0189942	0.00801249
P0A2L1	YJBQ_SALTY	UPF0047 protein YjbQ OS=Salmonella typhimurium (strain LT2 / SGSC1412 / ATCC 700720) GN=yjbQ PE=3 SV=1			0.0189884	0.0189884												0.00480342		0.00480342
Q8ZQX8	Q8ZQX8_SALTY	N-acetylglucosamine-6-phosphate deacetylase OS=Salmonella typhimurium (strain LT2 / SGSC1412 / ATCC 700720) GN=nagA PE=3 SV=1	0.0209184	0.0241913	0.0116944	0.0189347	0.00648032		0.034945			0.034945		0.541842
Q8ZQT4	Q8ZQT4_SALTY	Putative periplasmic protein OS=Salmonella typhimurium (strain LT2 / SGSC1412 / ATCC 700720) GN=ybgF PE=4 SV=1			0.0184856	0.0184856			0.0180799		0.0293349	0.0237074	0.00795847	0.779737					0.0163518	0.0163518		0.689732
Q8ZLF5	Q8ZLF5_SALTY	Cytosolic glycerophosphodiester phosphodiesterase OS=Salmonella typhimurium (strain LT2 / SGSC1412 / ATCC 700720) GN=ugpQ PE=4 SV=1			0.0184809	0.0184809			0.0269219	0.0437712	0.0276882	0.0327938	0.00951447	0.563548
Q7CPT4	Q7CPT4_SALTY	Putative oxidoreductase OS=Salmonella typhimurium (strain LT2 / SGSC1412 / ATCC 700720) GN=STM3128 PE=4 SV=1			0.0184075	0.0184075
Q8ZQL9	Q8ZQL9_SALTY	Putative electron transfer flavoprotein beta subunit OS=Salmonella typhimurium (strain LT2 / SGSC1412 / ATCC 700720) GN=STM0855 PE=4 SV=1			0.0183669	0.0183669			0.00908864			0.00908864		2.02086				0.0108391		0.0108391		1.19259
Q8ZLW2	Q8ZLW2_SALTY	Pyruvate formate-lyase 4 OS=Salmonella typhimurium (strain LT2 / SGSC1412 / ATCC 700720) GN=tdcE PE=4 SV=1	0.0183606			0.0183606			0.00338334			0.00338334		5.42677
Q8ZPG7	Q8ZPG7_SALTY	Putative zinc-binding dehydrogenase OS=Salmonella typhimurium (strain LT2 / SGSC1412 / ATCC 700720) GN=STM1542 PE=4 SV=1			0.0183357	0.0183357											0.0317401	0.0250984		0.0284193	0.00469639
Q8ZMW7	Q8ZMW7_SALTY	Chorismate mutase P OS=Salmonella typhimurium (strain LT2 / SGSC1412 / ATCC 700720) GN=pheA PE=4 SV=1			0.0183091	0.0183091
H9L481	H9L481_SALTY	Homolog of virK OS=Salmonella typhimurium (strain LT2 / SGSC1412 / ATCC 700720) GN=ybjX PE=4 SV=1			0.0182623	0.0182623			0.0353501	0.0402222		0.0377862	0.00344509	0.483305			0.0142381			0.0142381		0.376807
Q8ZQL2	Q8ZQL2_SALTY	Putative glutathione S-transferase OS=Salmonella typhimurium (strain LT2 / SGSC1412 / ATCC 700720) GN=yliJ PE=4 SV=1	0.0157727		0.0206218	0.0181972	0.00342879
Q8ZLB6	BCSQ_SALTY	Cellulose biosynthesis protein BcsQ OS=Salmonella typhimurium (strain LT2 / SGSC1412 / ATCC 700720) GN=bcsQ PE=3 SV=1			0.0181483	0.0181483
Q7CP84	Q7CP84_SALTY	Putative peptide maturation protein OS=Salmonella typhimurium (strain LT2 / SGSC1412 / ATCC 700720) GN=pmbA PE=4 SV=1	0.0211873		0.0151001	0.0181437	0.0043043											0.0163729	0.00927397	0.0128234	0.0050197
Q8ZPT5	Q8ZPT5_SALTY	Phosphofructokinase OS=Salmonella typhimurium (strain LT2 / SGSC1412 / ATCC 700720) GN=pfkB PE=3 SV=1			0.0181077	0.0181077			0.0260796	0.0212121		0.0236458	0.00344183	0.765787			0.00595519			0.00595519		0.251849
Q8ZNM8	Q8ZNM8_SALTY	Putative ABC superfamily transport protein (Bind_prot) OS=Salmonella typhimurium (strain LT2 / SGSC1412 / ATCC 700720) GN=yehZ PE=4 SV=1	0.0152732	0.0207616		0.0180174	0.00388091										0.0118465	0.0102618		0.0110542	0.00112057
Q9L6R3	Q9L6R3_SALTY	dTDP-glucose 4,6-dehydratase OS=Salmonella typhimurium (strain LT2 / SGSC1412 / ATCC 700720) GN=rffG PE=3 SV=1			0.0180093	0.0180093
Q8ZP52	ACNA_SALTY	Aconitate hydratase A OS=Salmonella typhimurium (strain LT2 / SGSC1412 / ATCC 700720) GN=acnA PE=1 SV=1	0.0228346	0.0131383		0.0179865	0.00685629
P58533	DTD_SALTY	D-aminoacyl-tRNA deacylase OS=Salmonella typhimurium (strain LT2 / SGSC1412 / ATCC 700720) GN=dtd PE=3 SV=1	0.0178761			0.0178761
P26394	RMLC_SALTY	dTDP-4-dehydrorhamnose 3,5-epimerase OS=Salmonella typhimurium (strain LT2 / SGSC1412 / ATCC 700720) GN=rfbC PE=1 SV=1			0.0178609	0.0178609											0.0235169		0.015875	0.019696	0.00540366
Q8ZR31	Q8ZR31_SALTY	2,3-dihydro-2,3-dihydroxybenzoate synthetase, isochorismatase OS=Salmonella typhimurium (strain LT2 / SGSC1412 / ATCC 700720) GN=entB PE=4 SV=1			0.0177673	0.0177673		0.0866345	0.101415	0.100472	0.0873158	0.0939594	0.00807863	0.189095			0.0207879			0.0207879		0.221243
P0A2C3	RNPH_SALTY	Ribonuclease PH OS=Salmonella typhimurium (strain LT2 / SGSC1412 / ATCC 700720) GN=rph PE=3 SV=1			0.0177438	0.0177438
P0A273	LEXA_SALTY	LexA repressor OS=Salmonella typhimurium (strain LT2 / SGSC1412 / ATCC 700720) GN=lexA PE=3 SV=1		0.0147348	0.020069	0.0174019	0.00377183										0.0460208	0.0188851	0.0291294	0.0313451	0.0137029
P33901	NUOF_SALTY	NADH-quinone oxidoreductase subunit F OS=Salmonella typhimurium (strain LT2 / SGSC1412 / ATCC 700720) GN=nuoF PE=3 SV=2			0.0173409	0.0173409				0.0124267		0.0124267		1.39546
P63263	CBPA_SALTY	Curved DNA-binding protein OS=Salmonella typhimurium (strain LT2 / SGSC1412 / ATCC 700720) GN=cbpA PE=3 SV=1	0.0172279			0.0172279												0.0177142	0.0146185	0.0161663	0.00218902
Q8ZRR0	PANB_SALTY	3-methyl-2-oxobutanoate hydroxymethyltransferase OS=Salmonella typhimurium (strain LT2 / SGSC1412 / ATCC 700720) GN=panB PE=3 SV=1			0.0171145	0.0171145
Q8ZQK0	Q8ZQK0_SALTY	Putrescine-binding periplasmic protein OS=Salmonella typhimurium (strain LT2 / SGSC1412 / ATCC 700720) GN=potF PE=3 SV=1			0.0170661	0.0170661													0.032028	0.032028
Q8ZRT3	Q8ZRT3_SALTY	Putative integral membrane protein OS=Salmonella typhimurium (strain LT2 / SGSC1412 / ATCC 700720) GN=hofB PE=4 SV=1	0.0169539			0.0169539
Q7CPP2	Q7CPP2_SALTY	Putative ABC superfamily transport protein OS=Salmonella typhimurium (strain LT2 / SGSC1412 / ATCC 700720) GN=yrbD PE=4 SV=1			0.0168631	0.0168631		0.0170176	0.0261843			0.021601	0.00648185	0.780664
Q7CPU3	Q7CPU3_SALTY	Putative Zn-dependent proteases with possible chaperone function OS=Salmonella typhimurium (strain LT2 / SGSC1412 / ATCC 700720) GN=yggG PE=3 SV=1	0.0167868			0.0167868
Q8ZR69	LPXH_SALTY	UDP-2,3-diacylglucosamine hydrolase OS=Salmonella typhimurium (strain LT2 / SGSC1412 / ATCC 700720) GN=lpxH PE=3 SV=1		0.0167667		0.0167667												0.00631381		0.00631381
Q8ZKP3	GLPK_SALTY	Glycerol kinase OS=Salmonella typhimurium (strain LT2 / SGSC1412 / ATCC 700720) GN=glpK PE=3 SV=3	0.0166314			0.0166314		0.022862	0.0371511	0.0294834		0.0298322	0.00715092	0.5575					0.00680861	0.00680861		0.22823
Q7CPM5	Q7CPM5_SALTY	Suppresses inhibitory activity of CsrA OS=Salmonella typhimurium (strain LT2 / SGSC1412 / ATCC 700720) GN=tldD PE=4 SV=1			0.0165633	0.0165633
P41793	EUTE_SALTY	Ethanolamine utilization protein EutE OS=Salmonella typhimurium (strain LT2 / SGSC1412 / ATCC 700720) GN=eutE PE=4 SV=2		0.0165069		0.0165069
P65817	HTPX_SALTY	Protease HtpX OS=Salmonella typhimurium (strain LT2 / SGSC1412 / ATCC 700720) GN=htpX PE=3 SV=1	0.0163458			0.0163458
Q93GR3	Q93GR3_SALTY	Putative adhesin OS=Salmonella typhimurium (strain LT2 / SGSC1412 / ATCC 700720) GN=PSLT034 PE=4 SV=1	0.0162973			0.0162973		0.0241986				0.0241986		0.673481			0.0067833			0.0067833		0.280318
Q8ZRX8	DAPB_SALTY	4-hydroxy-tetrahydrodipicolinate reductase OS=Salmonella typhimurium (strain LT2 / SGSC1412 / ATCC 700720) GN=dapB PE=3 SV=1			0.0162463	0.0162463												0.0163179		0.0163179
Q7CP87	Q7CP87_SALTY	Putative cytoplasmic protein OS=Salmonella typhimurium (strain LT2 / SGSC1412 / ATCC 700720) GN=ytfP PE=4 SV=1			0.0161511	0.0161511											0.0267602	0.0306423		0.0287012	0.00274502
P26464	DPO3B_SALTY	DNA polymerase III subunit beta OS=Salmonella typhimurium (strain LT2 / SGSC1412 / ATCC 700720) GN=dnaN PE=3 SV=3			0.0161011	0.0161011
Q8ZLN3	Q8ZLN3_SALTY	Putative ferripyochelin binding protein OS=Salmonella typhimurium (strain LT2 / SGSC1412 / ATCC 700720) GN=yrdA PE=1 SV=1	0.00939413		0.022202	0.0157981	0.00905656
Q7CPM2	Q7CPM2_SALTY	Putative oxidoreductase OS=Salmonella typhimurium (strain LT2 / SGSC1412 / ATCC 700720) GN=yhdH PE=1 SV=1		0.0157507		0.0157507													0.0188941	0.0188941
P11003	METF_SALTY	5,10-methylenetetrahydrofolate reductase OS=Salmonella typhimurium (strain LT2 / SGSC1412 / ATCC 700720) GN=metF PE=3 SV=2			0.015681	0.015681		0.0365081	0.0266476	0.0345928	0.0392167	0.0342413	0.00540621	0.457957
Q8ZMJ9	GUTQ_SALTY	Arabinose 5-phosphate isomerase GutQ OS=Salmonella typhimurium (strain LT2 / SGSC1412 / ATCC 700720) GN=gutQ PE=3 SV=2	0.0156708			0.0156708
O30916	SOPB_SALTY	Inositol phosphate phosphatase SopB OS=Salmonella typhimurium (strain LT2 / SGSC1412 / ATCC 700720) GN=sopB PE=1 SV=2	0.0153768			0.0153768			0.0211514			0.0211514		0.726985
P67735	NANR_SALTY	Transcriptional regulator NanR OS=Salmonella typhimurium (strain LT2 / SGSC1412 / ATCC 700720) GN=nanR PE=3 SV=1			0.0153109	0.0153109
P08007	OPPF_SALTY	Oligopeptide transport ATP-binding protein OppF OS=Salmonella typhimurium (strain LT2 / SGSC1412 / ATCC 700720) GN=oppF PE=3 SV=2	0.0153033			0.0153033
Q7CPK1	Q7CPK1_SALTY	Putative phosphotriesterase OS=Salmonella typhimurium (strain LT2 / SGSC1412 / ATCC 700720) GN=STM3550 PE=4 SV=1			0.0152797	0.0152797					0.0126635	0.0126635		1.20659
H9L441	H9L441_SALTY	Gifsy-2 prophage protein OS=Salmonella typhimurium (strain LT2 / SGSC1412 / ATCC 700720) GN=STM1018 PE=4 SV=1			0.0152641	0.0152641
Q8ZPN3	Q8ZPN3_SALTY	Putative multidrug resistance efflux pump OS=Salmonella typhimurium (strain LT2 / SGSC1412 / ATCC 700720) GN=ydhJ PE=4 SV=1	0.0140436		0.0164774	0.0152605	0.00172098		0.00875369			0.00875369		1.74332					0.01585	0.01585		1.81066
Q8ZPC4	Q8ZPC4_SALTY	Putative outer membrane lipoprotein OS=Salmonella typhimurium (strain LT2 / SGSC1412 / ATCC 700720) GN=STM1607 PE=4 SV=1			0.0148112	0.0148112											0.021947	0.00534113	0.0140977	0.0137953	0.00830707
P60829	YJGA_SALTY	UPF0307 protein YjgA OS=Salmonella typhimurium (strain LT2 / SGSC1412 / ATCC 700720) GN=yjgA PE=3 SV=1			0.0147972	0.0147972
P58525	MTOX_SALTY	N-methyl-L-tryptophan oxidase OS=Salmonella typhimurium (strain LT2 / SGSC1412 / ATCC 700720) GN=solA PE=3 SV=1			0.0146957	0.0146957			0.0147572			0.0147572		0.99583			0.0826935			0.0826935		5.60359
P52616	FLJB_SALTY	Phase 2 flagellin OS=Salmonella typhimurium (strain LT2 / SGSC1412 / ATCC 700720) GN=fljB PE=3 SV=2		0.00883018	0.0205593	0.0146947	0.00829373	0.0420463				0.0420463		0.349489			0.0074861	0.00250716	0.0213182	0.0104371	0.00974655	0.24823
Q8ZQ68	MATP_SALTY	Macrodomain Ter protein OS=Salmonella typhimurium (strain LT2 / SGSC1412 / ATCC 700720) GN=matP PE=3 SV=1	0.0146701			0.0146701
Q8ZMM2	Q8ZMM2_SALTY	NADP-dependent succinate-semialdehyde dehydrogenase I OS=Salmonella typhimurium (strain LT2 / SGSC1412 / ATCC 700720) GN=gabD PE=3 SV=1	0.0142006			0.0142006											0.00865881			0.00865881
Q8ZKS5	Q8ZKS5_SALTY	Putative cytoplasmic protein OS=Salmonella typhimurium (strain LT2 / SGSC1412 / ATCC 700720) GN=yiiG PE=4 SV=1		0.0140779		0.0140779
Q9L7R9	SQUT_SALTY	Sulfofructosephosphate aldolase OS=Salmonella typhimurium (strain LT2 / SGSC1412 / ATCC 700720) GN=yihT PE=1 SV=2			0.0139711	0.0139711
P56978	CYAY_SALTY	Protein CyaY OS=Salmonella typhimurium (strain LT2 / SGSC1412 / ATCC 700720) GN=cyaY PE=3 SV=1			0.0139649	0.0139649
Q8ZRS8	ACNB_SALTY	Aconitate hydratase B OS=Salmonella typhimurium (strain LT2 / SGSC1412 / ATCC 700720) GN=acnB PE=1 SV=1	0.0138281			0.0138281			0.0296399	0.0560129	0.0347638	0.0401388	0.013984	0.344506
Q8ZPL9	ADD_SALTY	Adenosine deaminase OS=Salmonella typhimurium (strain LT2 / SGSC1412 / ATCC 700720) GN=add PE=3 SV=1	0.0137445			0.0137445
Q93GP5	Q93GP5_SALTY	Putative ParB-like nuclease domain OS=Salmonella typhimurium (strain LT2 / SGSC1412 / ATCC 700720) GN=PSLT068 PE=4 SV=1	0.0137445			0.0137445
P15717	LEUC1_SALTY	3-isopropylmalate dehydratase large subunit 1 OS=Salmonella typhimurium (strain LT2 / SGSC1412 / ATCC 700720) GN=leuC1 PE=1 SV=4			0.0136744	0.0136744
Q8ZN45	Q8ZN45_SALTY	Sulfurtransferase OS=Salmonella typhimurium (strain LT2 / SGSC1412 / ATCC 700720) GN=sseA PE=4 SV=1			0.0134574	0.0134574			0.00890714			0.00890714		1.51085
P58580	GSHB_SALTY	Glutathione synthetase OS=Salmonella typhimurium (strain LT2 / SGSC1412 / ATCC 700720) GN=gshB PE=3 SV=1			0.0134418	0.0134418			0.0285554	0.0313504	0.00888452	0.0229301	0.0122439	0.586206
P65662	PAND_SALTY	Aspartate 1-decarboxylase OS=Salmonella typhimurium (strain LT2 / SGSC1412 / ATCC 700720) GN=panD PE=1 SV=1	0.0133335			0.0133335
Q8ZQU3	SDHA_SALTY	Succinate dehydrogenase flavoprotein subunit OS=Salmonella typhimurium (strain LT2 / SGSC1412 / ATCC 700720) GN=sdhA PE=3 SV=1			0.0132919	0.0132919			0.0239717			0.0239717		0.554482
Q8ZLS1	KDSD_SALTY	Arabinose 5-phosphate isomerase KdsD OS=Salmonella typhimurium (strain LT2 / SGSC1412 / ATCC 700720) GN=kdsD PE=3 SV=1			0.0131107	0.0131107
P22715	GALE_SALTY	UDP-glucose 4-epimerase OS=Salmonella typhimurium (strain LT2 / SGSC1412 / ATCC 700720) GN=galE PE=3 SV=2			0.0130951	0.0130951											0.0116278			0.0116278
Q9Z5Z2	NFSA_SALTY	Oxygen-insensitive NADPH nitroreductase OS=Salmonella typhimurium (strain LT2 / SGSC1412 / ATCC 700720) GN=nfsA PE=3 SV=2			0.0129436	0.0129436
P0A1Q8	HEM3_SALTY	Porphobilinogen deaminase OS=Salmonella typhimurium (strain LT2 / SGSC1412 / ATCC 700720) GN=hemC PE=3 SV=1	0.012819		0.0129702	0.0128946	0.000106915
Q8ZR04	LIPA_SALTY	Lipoyl synthase OS=Salmonella typhimurium (strain LT2 / SGSC1412 / ATCC 700720) GN=lipA PE=3 SV=1	0.0128875			0.0128875
P0A1W4	LEPA_SALTY	Elongation factor 4 OS=Salmonella typhimurium (strain LT2 / SGSC1412 / ATCC 700720) GN=lepA PE=3 SV=1			0.012711	0.012711			0.0548866	0.0535507	0.0403213	0.0495862	0.00805139	0.256341
H9L4B2	H9L4B2_SALTY	Putative LuxR/UhpA family response regulator OS=Salmonella typhimurium (strain LT2 / SGSC1412 / ATCC 700720) GN=uvrY PE=4 SV=1			0.0126126	0.0126126		0.0129572	0.0043886			0.00867288	0.00605888	1.45426
H9L444	H9L444_SALTY	Gifsy-1 prophage protein OS=Salmonella typhimurium (strain LT2 / SGSC1412 / ATCC 700720) GN=STM1012 PE=4 SV=1			0.0125657	0.0125657												0.0213195	0.00660845	0.013964	0.0104023
P37459	SINR_SALTY	Probable HTH-type transcriptional regulator SinR OS=Salmonella typhimurium (strain LT2 / SGSC1412 / ATCC 700720) GN=sinR PE=3 SV=1			0.0125345	0.0125345
Q7CPY6	Q7CPY6_SALTY	Membrane-bound lytic murein transglycosylase B OS=Salmonella typhimurium (strain LT2 / SGSC1412 / ATCC 700720) GN=mltB PE=4 SV=1			0.0122191	0.0122191
P0A2F0	RPOE_SALTY	ECF RNA polymerase sigma-E factor OS=Salmonella typhimurium (strain LT2 / SGSC1412 / ATCC 700720) GN=rpoE PE=3 SV=1			0.0121847	0.0121847
P0A2P8	CRA_SALTY	Catabolite repressor/activator OS=Salmonella typhimurium (strain LT2 / SGSC1412 / ATCC 700720) GN=cra PE=3 SV=1			0.0121457	0.0121457				0.0117563		0.0117563		1.03312			0.0150975		0.00795025	0.0115239	0.00505388	0.980227
Q7CQG4	Q7CQG4_SALTY	Putative cytoplasmic protein OS=Salmonella typhimurium (strain LT2 / SGSC1412 / ATCC 700720) GN=yciN PE=4 SV=1			0.012027	0.012027
Q8ZM88	Q8ZM88_SALTY	Putative periplasmic protein OS=Salmonella typhimurium (strain LT2 / SGSC1412 / ATCC 700720) GN=STM3030 PE=4 SV=1			0.0120114	0.0120114											0.00809847	0.00536658		0.00673252	0.00193174
Q8ZNP3	Q8ZNP3_SALTY	Putative cytoplasmic protein OS=Salmonella typhimurium (strain LT2 / SGSC1412 / ATCC 700720) GN=STM2138 PE=1 SV=1			0.0116788	0.0116788
P06614	CYSB_SALTY	HTH-type transcriptional regulator CysB OS=Salmonella typhimurium (strain LT2 / SGSC1412 / ATCC 700720) GN=cysB PE=1 SV=1			0.0116632	0.0116632					0.0128284	0.0128284		0.909169
Q7CQL0	Q7CQL0_SALTY	Cyclopropane fatty acyl phospholipid synthase OS=Salmonella typhimurium (strain LT2 / SGSC1412 / ATCC 700720) GN=cfa PE=4 SV=1	0.0115693			0.0115693
Q8ZN32	Q8ZN32_SALTY	Putative transcriptional regulator of two-component regulator protein OS=Salmonella typhimurium (strain LT2 / SGSC1412 / ATCC 700720) GN=yfhA PE=4 SV=1			0.0114883	0.0114883
P65454	MURA_SALTY	UDP-N-acetylglucosamine 1-carboxyvinyltransferase OS=Salmonella typhimurium (strain LT2 / SGSC1412 / ATCC 700720) GN=murA PE=3 SV=1		0.0113891		0.0113891				0.0233105	0.0227742	0.0230424	0.000379222	0.494267
Q8ZPC0	Q8ZPC0_SALTY	Acetyl transferase OS=Salmonella typhimurium (strain LT2 / SGSC1412 / ATCC 700720) GN=rimL PE=1 SV=1			0.0113524	0.0113524
P58627	YCEF_SALTY	Maf-like protein YceF OS=Salmonella typhimurium (strain LT2 / SGSC1412 / ATCC 700720) GN=yceF PE=3 SV=1	0.0112753			0.0112753
Q8ZLX5	RLMG_SALTY	Ribosomal RNA large subunit methyltransferase G OS=Salmonella typhimurium (strain LT2 / SGSC1412 / ATCC 700720) GN=rlmG PE=3 SV=1			0.0112291	0.0112291
P25945	TONB_SALTY	Protein TonB OS=Salmonella typhimurium (strain LT2 / SGSC1412 / ATCC 700720) GN=tonB PE=3 SV=2			0.0111822	0.0111822											0.02513	0.0324449	0.0335899	0.0303883	0.00458964
Q8ZR77	Q8ZR77_SALTY	Allantoate amidohydrolase OS=Salmonella typhimurium (strain LT2 / SGSC1412 / ATCC 700720) GN=allC PE=4 SV=1	0.0111817			0.0111817
Q8ZK76	YTFE_SALTY	Iron-sulfur cluster repair protein YtfE OS=Salmonella typhimurium (strain LT2 / SGSC1412 / ATCC 700720) GN=ytfE PE=3 SV=1			0.011151	0.011151											0.0120132	0.00901596	0.0117273	0.0109188	0.00165412
Q8ZMY0	Q8ZMY0_SALTY	Anti-sigma-E factor RseA OS=Salmonella typhimurium (strain LT2 / SGSC1412 / ATCC 700720) GN=rseA PE=3 SV=1			0.0108324	0.0108324											0.012612			0.012612
P29848	CYSM_SALTY	Cysteine synthase B OS=Salmonella typhimurium (strain LT2 / SGSC1412 / ATCC 700720) GN=cysM PE=1 SV=1	0.0108192			0.0108192
Q8ZNY6	Q8ZNY6_SALTY	Putative acetyltransferase OS=Salmonella typhimurium (strain LT2 / SGSC1412 / ATCC 700720) GN=STM1857 PE=4 SV=1	0.0104082			0.0104082					0.0246045	0.0246045		0.423021
Q8ZR68	SYC_SALTY	Cysteine--tRNA ligase OS=Salmonella typhimurium (strain LT2 / SGSC1412 / ATCC 700720) GN=cysS PE=3 SV=1			0.0102172	0.0102172
Q7CPS2	Q7CPS2_SALTY	Putative resistance protein OS=Salmonella typhimurium (strain LT2 / SGSC1412 / ATCC 700720) GN=yqiE PE=3 SV=1	0.0100106			0.0100106
Q7CQV6	Q7CQV6_SALTY	Putative hydrolase of the HAD superfamily OS=Salmonella typhimurium (strain LT2 / SGSC1412 / ATCC 700720) GN=ybiV(1) PE=4 SV=1	0.00995213			0.00995213
Q93GQ6	Q93GQ6_SALTY	Mutagenesis by UV and mutagens related to umuDC operon OS=Salmonella typhimurium (strain LT2 / SGSC1412 / ATCC 700720) GN=samB PE=4 SV=1	0.00969151			0.00969151
Q7CR60	Q7CR60_SALTY	Transcriptional regulator for nitrite reductase (Cytochrome c552) OS=Salmonella typhimurium (strain LT2 / SGSC1412 / ATCC 700720) GN=dniR PE=4 SV=1	0.00963303			0.00963303
Q8ZM78	Q8ZM78_SALTY	6-phospho-beta-glucosidase A OS=Salmonella typhimurium (strain LT2 / SGSC1412 / ATCC 700720) GN=bglA PE=3 SV=1	0.00959962			0.00959962			0.0175144			0.0175144		0.548099
Q8ZLD1	Q8ZLD1_SALTY	Putative sugar kinases OS=Salmonella typhimurium (strain LT2 / SGSC1412 / ATCC 700720) GN=STM3600 PE=4 SV=1			0.00930056	0.00930056
Q8ZQU2	SDHB_SALTY	Succinate dehydrogenase iron-sulfur subunit OS=Salmonella typhimurium (strain LT2 / SGSC1412 / ATCC 700720) GN=sdhB PE=3 SV=2	0.00900654			0.00900654			0.00925158			0.00925158		0.973513
Q8ZKT0	FDHE_SALTY	Protein FdhE OS=Salmonella typhimurium (strain LT2 / SGSC1412 / ATCC 700720) GN=fdhE PE=3 SV=1			0.00872435	0.00872435											0.011885			0.011885
Q8ZPE8	MAO1_SALTY	NAD-dependent malic enzyme OS=Salmonella typhimurium (strain LT2 / SGSC1412 / ATCC 700720) GN=maeA PE=3 SV=1	0.00855546			0.00855546			0.0207092	0.0182704		0.0194898	0.00172447	0.43897
P0A287	RF1_SALTY	Peptide chain release factor 1 OS=Salmonella typhimurium (strain LT2 / SGSC1412 / ATCC 700720) GN=prfA PE=3 SV=1	0.00849698			0.00849698
Q8XEY4	Q8XEY4_SALTY	Putative cytoplasmic protein OS=Salmonella typhimurium (strain LT2 / SGSC1412 / ATCC 700720) GN=yehS PE=4 SV=1			0.00849168	0.00849168
Q8ZNL2	Q8ZNL2_SALTY	Putative phosphoserine phosphatase OS=Salmonella typhimurium (strain LT2 / SGSC1412 / ATCC 700720) GN=STM2197 PE=4 SV=1			0.0081497	0.0081497
O54326	FPG_SALTY	Formamidopyrimidine-DNA glycosylase OS=Salmonella typhimurium (strain LT2 / SGSC1412 / ATCC 700720) GN=mutM PE=3 SV=3			0.00808099	0.00808099
Q8ZPU1	CHBG_SALTY	Chitooligosaccharide deacetylase OS=Salmonella typhimurium (strain LT2 / SGSC1412 / ATCC 700720) GN=chbG PE=3 SV=1			0.00793108	0.00793108
P0CL50	OTSB_SALTY	Trehalose-phosphate phosphatase OS=Salmonella typhimurium (strain LT2 / SGSC1412 / ATCC 700720) GN=otsB PE=3 SV=1	0.00768838			0.00768838
P65449	MSRB_SALTY	Peptide methionine sulfoxide reductase MsrB OS=Salmonella typhimurium (strain LT2 / SGSC1412 / ATCC 700720) GN=msrB PE=3 SV=1			0.00750634	0.00750634
P26478	MALM_SALTY	Maltose operon periplasmic protein OS=Salmonella typhimurium (strain LT2 / SGSC1412 / ATCC 700720) GN=malM PE=3 SV=2			0.0074595	0.0074595												0.0150243	0.0164806	0.0157525	0.00102972
Q8ZPE2	Q8ZPE2_SALTY	Putative transcriptional regulator, TetR family OS=Salmonella typhimurium (strain LT2 / SGSC1412 / ATCC 700720) GN=STM1575 PE=4 SV=1			0.00703007	0.00703007
Q8ZQM8	Q8ZQM8_SALTY	Putative hydrolase of the HAD superfamily OS=Salmonella typhimurium (strain LT2 / SGSC1412 / ATCC 700720) GN=ybiV(2) PE=4 SV=1			0.00694419	0.00694419
P40814	T3MO_SALTY	Type III restriction-modification system StyLTI enzyme mod OS=Salmonella typhimurium (strain LT2 / SGSC1412 / ATCC 700720) GN=mod PE=3 SV=2			0.00679584	0.00679584
P37168	YCEM_SALTY	Putative oxidoreductase YceM OS=Salmonella typhimurium (strain LT2 / SGSC1412 / ATCC 700720) GN=yceM PE=1 SV=2			0.0065944	0.0065944
Q8ZP38	Q8ZP38_SALTY	Nitrate reductase 1, FeS (Beta) subunit OS=Salmonella typhimurium (strain LT2 / SGSC1412 / ATCC 700720) GN=narH PE=4 SV=1			0.00623056	0.00623056			0.0397478			0.0397478		0.156752
Q8ZRG0	Q8ZRG0_SALTY	Putative transcription regulator, AraC family OS=Salmonella typhimurium (strain LT2 / SGSC1412 / ATCC 700720) GN=STM0363 PE=4 SV=1			0.00620558	0.00620558
Q8ZNY3	Q8ZNY3_SALTY	Putative transposase OS=Salmonella typhimurium (strain LT2 / SGSC1412 / ATCC 700720) GN=STM1860 PE=4 SV=1			0.00606504	0.00606504
Q8ZM02	Q8ZM02_SALTY	Putative dicarboxylate-binding periplasmic protein OS=Salmonella typhimurium (strain LT2 / SGSC1412 / ATCC 700720) GN=STM3169 PE=4 SV=1			0.00573399	0.00573399
Q8ZLU5	Q8ZLU5_SALTY	Ribosomal RNA small subunit methyltransferase I OS=Salmonella typhimurium (strain LT2 / SGSC1412 / ATCC 700720) GN=yraL PE=3 SV=1			0.00524054	0.00524054
Q8ZLE0	Q8ZLE0_SALTY	Putative ABC-type multidrug transport system OS=Salmonella typhimurium (strain LT2 / SGSC1412 / ATCC 700720) GN=yhiH PE=3 SV=1			0.0051328	0.0051328			0.00777647			0.00777647		0.660042
P0A1J7	FLGN_SALTY	Flagella synthesis protein FlgN OS=Salmonella typhimurium (strain LT2 / SGSC1412 / ATCC 700720) GN=flgN PE=3 SV=1			0.00510157	0.00510157
Q7CQG6	Q7CQG6_SALTY	Lipopolysaccharide assembly protein B OS=Salmonella typhimurium (strain LT2 / SGSC1412 / ATCC 700720) GN=yciM PE=3 SV=1	0.00664422		0.00315744	0.00490083	0.00246552
P40822	YCEB_SALTY	Uncharacterized lipoprotein YceB OS=Salmonella typhimurium (strain LT2 / SGSC1412 / ATCC 700720) GN=yceB PE=3 SV=2			0.00340573	0.00340573												0.0218913		0.0218913
Q8ZLW6	Q8ZLW6_SALTY	Putative cytoplasmic protein OS=Salmonella typhimurium (strain LT2 / SGSC1412 / ATCC 700720) GN=yhaK PE=3 SV=1			0.00315744	0.00315744
P26405	RFBK_SALTY	Phosphomannomutase OS=Salmonella typhimurium (strain LT2 / SGSC1412 / ATCC 700720) GN=rfbK PE=3 SV=1															0.162152			0.162152
Q8ZPE9	Q8ZPE9_SALTY	Putative outer membrane or secreted lipoprotein OS=Salmonella typhimurium (strain LT2 / SGSC1412 / ATCC 700720) GN=STM1561 PE=4 SV=1																0.118146		0.118146
Q8ZPE5	Q8ZPE5_SALTY	Putative molybdopterin oxidoreductases OS=Salmonella typhimurium (strain LT2 / SGSC1412 / ATCC 700720) GN=fdnG PE=4 SV=3															0.114814			0.114814
P0A6R6	FIS_SALTY	DNA-binding protein Fis OS=Salmonella typhimurium (strain LT2 / SGSC1412 / ATCC 700720) GN=fis PE=3 SV=1																0.0948667	0.0802313	0.087549	0.0103488
P0A1Q4	DNAB_SALTY	Replicative DNA helicase OS=Salmonella typhimurium (strain LT2 / SGSC1412 / ATCC 700720) GN=dnaB PE=3 SV=1															0.064254		0.0557101	0.059982	0.00604143
Q8ZLY7	Q8ZLY7_SALTY	Putative membrane protein OS=Salmonella typhimurium (strain LT2 / SGSC1412 / ATCC 700720) GN=yqiK PE=4 SV=1																	0.0588394	0.0588394
P0DM81	RPOS_SALTY	RNA polymerase sigma factor RpoS OS=Salmonella typhimurium (strain LT2 / SGSC1412 / ATCC 700720) GN=rpoS PE=3 SV=1															0.0573897			0.0573897
P64008	DUT_SALTY	Deoxyuridine 5'-triphosphate nucleotidohydrolase OS=Salmonella typhimurium (strain LT2 / SGSC1412 / ATCC 700720) GN=dut PE=3 SV=1															0.0562028			0.0562028
Q8ZKE3	Q8ZKE3_SALTY	Arginine decarboxylase OS=Salmonella typhimurium (strain LT2 / SGSC1412 / ATCC 700720) GN=adi PE=4 SV=1																	0.0542233	0.0542233
P07800	CHEZ_SALTY	Protein phosphatase CheZ OS=Salmonella typhimurium (strain LT2 / SGSC1412 / ATCC 700720) GN=cheZ PE=1 SV=1						0.0115177		0.0208942	0.00539848	0.0126035	0.00780473				0.049413			0.049413		3.92059
Q8ZNC4	Q8ZNC4_SALTY	Putative diaminopimelate decarboxylase OS=Salmonella typhimurium (strain LT2 / SGSC1412 / ATCC 700720) GN=STM2360 PE=3 SV=1															0.046149			0.046149
P15875	LEU1_SALTY	2-isopropylmalate synthase OS=Salmonella typhimurium (strain LT2 / SGSC1412 / ATCC 700720) GN=leuA PE=3 SV=4								0.0106812		0.0106812							0.0453946	0.0453946		4.24994
Q7CQ14	Q7CQ14_SALTY	Uncharacterized protein OS=Salmonella typhimurium (strain LT2 / SGSC1412 / ATCC 700720) GN=yfhJ PE=4 SV=1																	0.0409193	0.0409193
P40827	NLPD_SALTY	Murein hydrolase activator NlpD OS=Salmonella typhimurium (strain LT2 / SGSC1412 / ATCC 700720) GN=nlpD PE=3 SV=2															0.0372266	0.0411654	0.0430543	0.0404821	0.00297335
Q7CQ32	Q7CQ32_SALTY	Lipoprotein OS=Salmonella typhimurium (strain LT2 / SGSC1412 / ATCC 700720) GN=vacJ PE=4 SV=1															0.039244			0.039244
Q8ZQ08	LPOB_SALTY	Penicillin-binding protein activator LpoB OS=Salmonella typhimurium (strain LT2 / SGSC1412 / ATCC 700720) GN=lpoB PE=1 SV=1																0.0377347		0.0377347
Q8ZQT6	Q8ZQT6_SALTY	Tol protein, membrane spanning protein OS=Salmonella typhimurium (strain LT2 / SGSC1412 / ATCC 700720) GN=tolA PE=4 SV=1															0.0357057			0.0357057
Q7CPN4	Q7CPN4_SALTY	Stringent starvation protein B OS=Salmonella typhimurium (strain LT2 / SGSC1412 / ATCC 700720) GN=sspB PE=4 SV=1																0.0345548		0.0345548
Q7CQZ7	Q7CQZ7_SALTY	Regulator of nucleoside diphosphate kinase OS=Salmonella typhimurium (strain LT2 / SGSC1412 / ATCC 700720) GN=rnk PE=3 SV=1																	0.0335598	0.0335598
Q8ZKP9	LSRG_SALTY	Autoinducer 2-degrading protein LsrG OS=Salmonella typhimurium (strain LT2 / SGSC1412 / ATCC 700720) GN=lsrG PE=2 SV=2								0.0141668		0.0141668						0.0308064	0.0350693	0.0329378	0.00301436	2.325
Q8ZK41	Q8ZK41_SALTY	Putative phosphotransferase system mannitol/fructose-specific IIA domain (Ntr-type) OS=Salmonella typhimurium (strain LT2 / SGSC1412 / ATCC 700720) GN=STM4448 PE=4 SV=1																	0.0324584	0.0324584
P64209	GCH1_SALTY	GTP cyclohydrolase 1 OS=Salmonella typhimurium (strain LT2 / SGSC1412 / ATCC 700720) GN=folE PE=3 SV=2															0.031509			0.031509
Q7CPU7	Q7CPU7_SALTY	Putative membrane protein OS=Salmonella typhimurium (strain LT2 / SGSC1412 / ATCC 700720) GN=yggB PE=4 SV=1								0.0225762		0.0225762						0.0249789	0.0355275	0.0302532	0.00745902	1.34005
Q8ZP73	Q8ZP73_SALTY	Putative AraC family bacterial regulatory helix-turn-helix protein OS=Salmonella typhimurium (strain LT2 / SGSC1412 / ATCC 700720) GN=STM1674 PE=4 SV=1							0.0230291			0.0230291					0.0276007			0.0276007		1.19852
P67179	YEBC_SALTY	Probable transcriptional regulatory protein YebC OS=Salmonella typhimurium (strain LT2 / SGSC1412 / ATCC 700720) GN=yebC PE=3 SV=1							0.0856456			0.0856456					0.0273761			0.0273761		0.319644
Q8ZN92	Q8ZN92_SALTY	Putative LysR family transcriptional regulator OS=Salmonella typhimurium (strain LT2 / SGSC1412 / ATCC 700720) GN=yfeR PE=4 SV=1															0.0272668			0.0272668
P67458	EX7S_SALTY	Exodeoxyribonuclease 7 small subunit OS=Salmonella typhimurium (strain LT2 / SGSC1412 / ATCC 700720) GN=xseB PE=3 SV=2							0.0227082			0.0227082					0.0297375	0.0243848		0.0270612	0.00378493	1.19169
Q8ZMC0	Q8ZMC0_SALTY	Membrane-bound lytic murein transglycosylase A OS=Salmonella typhimurium (strain LT2 / SGSC1412 / ATCC 700720) GN=mltA PE=4 SV=1																	0.0265084	0.0265084
Q8ZN42	HSCA_SALTY	Chaperone protein HscA OS=Salmonella typhimurium (strain LT2 / SGSC1412 / ATCC 700720) GN=hscA PE=3 SV=1							0.0277366			0.0277366					0.0262424			0.0262424		0.946131
P66974	TRMJ_SALTY	tRNA (cytidine/uridine-2'-O-)-methyltransferase TrmJ OS=Salmonella typhimurium (strain LT2 / SGSC1412 / ATCC 700720) GN=trmJ PE=3 SV=1															0.0376888	0.0136058		0.0256473	0.0170293
Q7CPN3	Q7CPN3_SALTY	Periplasmic serine endoprotease OS=Salmonella typhimurium (strain LT2 / SGSC1412 / ATCC 700720) GN=degS PE=4 SV=1																0.0256448	0.0246574	0.0251511	0.000698179
Q7CPJ9	PANM_SALTY	PanD maturation factor OS=Salmonella typhimurium (strain LT2 / SGSC1412 / ATCC 700720) GN=panM PE=1 SV=1																0.0238558		0.0238558
P08421	PYRI_SALTY	Aspartate carbamoyltransferase regulatory chain OS=Salmonella typhimurium (strain LT2 / SGSC1412 / ATCC 700720) GN=pyrI PE=3 SV=3							0.0346241			0.0346241					0.0264907		0.0204444	0.0234675	0.00427541	0.67778
Q7CQP2	Q7CQP2_SALTY	PTS family sugar specific enzyme IIB for cellobiose, arbutin, and salicin OS=Salmonella typhimurium (strain LT2 / SGSC1412 / ATCC 700720) GN=celA PE=4 SV=1							0.0132491			0.0132491						0.0229817		0.0229817		1.73458
Q7CQE2	Q7CQE2_SALTY	Putative fumarylacetoacetate (FAA) hydrolase family protein OS=Salmonella typhimurium (strain LT2 / SGSC1412 / ATCC 700720) GN=ycgM PE=4 SV=1															0.0222485			0.0222485
Q8ZR94	Q8ZR94_SALTY	Putative inner membrane protein OS=Salmonella typhimurium (strain LT2 / SGSC1412 / ATCC 700720) GN=ybbK PE=4 SV=1																0.0216299		0.0216299
P17127	PTFAH_SALTY	Multiphosphoryl transfer protein OS=Salmonella typhimurium (strain LT2 / SGSC1412 / ATCC 700720) GN=fruB PE=2 SV=1							0.0184244			0.0184244					0.0222851	0.0186669		0.020476	0.00255847	1.11135
Q7CR52	CRL_SALTY	Sigma factor-binding protein Crl OS=Salmonella typhimurium (strain LT2 / SGSC1412 / ATCC 700720) GN=crl PE=2 SV=1																0.01993		0.01993
Q8ZKN9	Q8ZKN9_SALTY	Essential cell division protein OS=Salmonella typhimurium (strain LT2 / SGSC1412 / ATCC 700720) GN=ftsN PE=4 SV=1															0.0198126			0.0198126
Q8ZPV6	Q8ZPV6_SALTY	Protease 4 OS=Salmonella typhimurium (strain LT2 / SGSC1412 / ATCC 700720) GN=sppA PE=3 SV=1							0.0160739			0.0160739					0.0243728	0.0164784	0.0177899	0.019547	0.00423039	1.21607
P58683	APHA_SALTY	Class B acid phosphatase OS=Salmonella typhimurium (strain LT2 / SGSC1412 / ATCC 700720) GN=aphA PE=1 SV=1						0.0194562		0.0436179		0.031537	0.0170849					0.0189723		0.0189723		0.601589
Q8ZS14	YAAI_SALTY	UPF0412 protein YaaI OS=Salmonella typhimurium (strain LT2 / SGSC1412 / ATCC 700720) GN=yaaI PE=3 SV=1															0.0185589			0.0185589
Q8ZQ34	NANM_SALTY	N-acetylneuraminate epimerase OS=Salmonella typhimurium (strain LT2 / SGSC1412 / ATCC 700720) GN=nanM PE=3 SV=1																0.0185219		0.0185219
Q8ZQF3	Q8ZQF3_SALTY	Putative aminidase OS=Salmonella typhimurium (strain LT2 / SGSC1412 / ATCC 700720) GN=ybjR PE=4 SV=1							0.00724146			0.00724146						0.0169497	0.0200301	0.0184899	0.0021782	2.55334
Q8ZPB0	Q8ZPB0_SALTY	Putative LysR family transcriptional regulator OS=Salmonella typhimurium (strain LT2 / SGSC1412 / ATCC 700720) GN=ydcI PE=4 SV=1									0.0166773	0.0166773						0.0205582	0.0159626	0.0182604	0.00324958	1.09493
Q8ZRJ2	Q8ZRJ2_SALTY	Putative cytoplasmic protein OS=Salmonella typhimurium (strain LT2 / SGSC1412 / ATCC 700720) GN=STM0327 PE=1 SV=1																0.0206877	0.0150679	0.0178778	0.00397382
Q7CPK4	Q7CPK4_SALTY	Gluconate kinase 2 in GNT I system OS=Salmonella typhimurium (strain LT2 / SGSC1412 / ATCC 700720) GN=gntK PE=4 SV=1															0.0171598			0.0171598
Q8ZR34	Q8ZR34_SALTY	Ferric enterobactin (Enterochelin) tranporter OS=Salmonella typhimurium (strain LT2 / SGSC1412 / ATCC 700720) GN=fepB PE=4 SV=1							0.0138638	0.0109673		0.0124155	0.00204807						0.0161878	0.0161878		1.30383
Q7BVH7	SSEB_SALTY	Secreted effector protein SseB OS=Salmonella typhimurium (strain LT2 / SGSC1412 / ATCC 700720) GN=sseB PE=1 SV=1																0.0150652		0.0150652
Q9X6M5	KGUA_SALTY	Guanylate kinase OS=Salmonella typhimurium (strain LT2 / SGSC1412 / ATCC 700720) GN=gmk PE=3 SV=1							0.00564054			0.00564054					0.0297635	0.00871552	0.00663439	0.0150378	0.0127952	2.66602
Q8ZLY9	Q8ZLY9_SALTY	Putative cytoplasmic protein OS=Salmonella typhimurium (strain LT2 / SGSC1412 / ATCC 700720) GN=yqiC PE=4 SV=1									0.0200843	0.0200843					0.0105562	0.01951		0.0150331	0.00633132	0.7485
P37426	RIR1_SALTY	Ribonucleoside-diphosphate reductase 1 subunit alpha OS=Salmonella typhimurium (strain LT2 / SGSC1412 / ATCC 700720) GN=nrdA PE=3 SV=1							0.0580744	0.0576719	0.0568033	0.0575165	0.000649655						0.0149238	0.0149238		0.25947
P37604	DACD_SALTY	D-alanyl-D-alanine carboxypeptidase DacD OS=Salmonella typhimurium (strain LT2 / SGSC1412 / ATCC 700720) GN=dacD PE=3 SV=1							0.0154086			0.0154086						0.013778	0.0155196	0.0146488	0.00123151	0.950694
Q8ZPP4	Q8ZPP4_SALTY	Secretion system apparatus protein OS=Salmonella typhimurium (strain LT2 / SGSC1412 / ATCC 700720) GN=ssaD PE=4 SV=1							0.0354153			0.0354153					0.0145803			0.0145803		0.411695
Q8ZMD6	Q8ZMD6_SALTY	Putative MFS superfamily D-glucarate permease OS=Salmonella typhimurium (strain LT2 / SGSC1412 / ATCC 700720) GN=STM2963 PE=4 SV=1						0.0310329				0.0310329						0.0139385	0.0145531	0.0142458	0.000434633	0.459054
Q7CR83	Q7CR83_SALTY	Division specific transpeptidase OS=Salmonella typhimurium (strain LT2 / SGSC1412 / ATCC 700720) GN=ftsI PE=4 SV=1							0.014999			0.014999					0.0140022			0.0140022		0.933547
P58687	AROD_SALTY	3-dehydroquinate dehydratase OS=Salmonella typhimurium (strain LT2 / SGSC1412 / ATCC 700720) GN=aroD PE=1 SV=1																0.0135258		0.0135258
Q7DAP1	Q7DAP1_SALTY	Alpha-helical coiled coil protein OS=Salmonella typhimurium (strain LT2 / SGSC1412 / ATCC 700720) GN=tlpA PE=4 SV=1							0.0155529			0.0155529					0.0119299		0.0147964	0.0133631	0.00202692	0.859203
P61482	LOLD_SALTY	Lipoprotein-releasing system ATP-binding protein LolD OS=Salmonella typhimurium (strain LT2 / SGSC1412 / ATCC 700720) GN=lolD PE=3 SV=1															0.0155727	0.0109941		0.0132834	0.00323762
Q05591	CBIJ_SALTY	Cobalt-precorrin-6A reductase OS=Salmonella typhimurium (strain LT2 / SGSC1412 / ATCC 700720) GN=cbiJ PE=3 SV=1															0.013245			0.013245
Q8ZLK0	Q8ZLK0_SALTY	Putative inner membrane protein OS=Salmonella typhimurium (strain LT2 / SGSC1412 / ATCC 700720) GN=yrfB PE=4 SV=1															0.0127509			0.0127509
P37457	WECG_SALTY	UDP-N-acetyl-D-mannosaminuronic acid transferase OS=Salmonella typhimurium (strain LT2 / SGSC1412 / ATCC 700720) GN=wecG PE=3 SV=1															0.0124494			0.0124494
P19576	MALE_SALTY	Maltose-binding periplasmic protein OS=Salmonella typhimurium (strain LT2 / SGSC1412 / ATCC 700720) GN=malE PE=1 SV=2							0.0188105			0.0188105					0.0141866	0.01047		0.0123283	0.00262808	0.655397
P37174	YBAK_SALTY	Cys-tRNA(Pro)/Cys-tRNA(Cys) deacylase YbaK OS=Salmonella typhimurium (strain LT2 / SGSC1412 / ATCC 700720) GN=ybaK PE=3 SV=1																0.0123258		0.0123258
Q8ZPQ0	Q8ZPQ0_SALTY	Putative LysM domain protein OS=Salmonella typhimurium (strain LT2 / SGSC1412 / ATCC 700720) GN=ynhG PE=4 SV=1																	0.0121202	0.0121202
Q8ZL36	Q8ZL36_SALTY	Putative inner membrane protein OS=Salmonella typhimurium (strain LT2 / SGSC1412 / ATCC 700720) GN=yicH PE=4 SV=1							0.0106759	0.0274747		0.0190753	0.0118785					0.0120286		0.0120286		0.630581
P0A2K5	UBIE_SALTY	Ubiquinone/menaquinone biosynthesis C-methyltransferase UbiE OS=Salmonella typhimurium (strain LT2 / SGSC1412 / ATCC 700720) GN=ubiE PE=3 SV=1															0.0119919			0.0119919
Q8ZRM9	METN1_SALTY	Methionine import ATP-binding protein MetN 1 OS=Salmonella typhimurium (strain LT2 / SGSC1412 / ATCC 700720) GN=metN1 PE=3 SV=1							0.0221006			0.0221006					0.0119831			0.0119831		0.542207
P63462	AZOR_SALTY	FMN-dependent NADH-azoreductase OS=Salmonella typhimurium (strain LT2 / SGSC1412 / ATCC 700720) GN=azoR PE=1 SV=2																	0.0116244	0.0116244
Q8ZNT8	Q8ZNT8_SALTY	Putative ABC-type polar amino acid transport system OS=Salmonella typhimurium (strain LT2 / SGSC1412 / ATCC 700720) GN=yecC PE=3 SV=1																	0.0112769	0.0112769
P17750	KATG_SALTY	Catalase-peroxidase OS=Salmonella typhimurium (strain LT2 / SGSC1412 / ATCC 700720) GN=katG PE=3 SV=3																0.0111359		0.0111359
Q8ZQL8	Q8ZQL8_SALTY	Putative electron transfer flavoprotein alpha subunit OS=Salmonella typhimurium (strain LT2 / SGSC1412 / ATCC 700720) GN=STM0856 PE=4 SV=1															0.0111213			0.0111213
P17215	LIVJ_SALTY	Leu/Ile/Val/Thr-binding protein OS=Salmonella typhimurium (strain LT2 / SGSC1412 / ATCC 700720) GN=livJ PE=1 SV=1															0.0110503			0.0110503
Q8ZP39	Q8ZP39_SALTY	Nitrate reductase 1, delta subunit OS=Salmonella typhimurium (strain LT2 / SGSC1412 / ATCC 700720) GN=narJ PE=4 SV=1																0.0106563		0.0106563
H9L422	H9L422_SALTY	Gifsy-2 prophage probable minor tail protein OS=Salmonella typhimurium (strain LT2 / SGSC1412 / ATCC 700720) GN=STM1045 PE=4 SV=1																0.010605		0.010605
Q8ZQ74	Q8ZQ74_SALTY	Putative iron-sulfur protein OS=Salmonella typhimurium (strain LT2 / SGSC1412 / ATCC 700720) GN=STM1060 PE=4 SV=1															0.0105674			0.0105674
Q7CPG6	Q7CPG6_SALTY	Putative inner membrane protein OS=Salmonella typhimurium (strain LT2 / SGSC1412 / ATCC 700720) GN=slsA PE=4 SV=1															0.0104687			0.0104687
Q8ZNF7	Q8ZNF7_SALTY	CinA-like protein OS=Salmonella typhimurium (strain LT2 / SGSC1412 / ATCC 700720) GN=STM2293 PE=3 SV=1																	0.0101705	0.0101705
Q7CPF8	Q7CPF8_SALTY	Putative periplasmic protein OS=Salmonella typhimurium (strain LT2 / SGSC1412 / ATCC 700720) GN=STM3783 PE=4 SV=1																0.00987274		0.00987274
Q8ZRR2	Q8ZRR2_SALTY	Putative xylanase/chitin deacetylase OS=Salmonella typhimurium (strain LT2 / SGSC1412 / ATCC 700720) GN=yadE PE=4 SV=1									0.0258211	0.0258211					0.0121031	0.00909459	0.00811009	0.00976925	0.00208023	0.378343
P0A2K9	NUDL_SALTY	Uncharacterized Nudix hydrolase NudL OS=Salmonella typhimurium (strain LT2 / SGSC1412 / ATCC 700720) GN=nudL PE=3 SV=1																	0.00941668	0.00941668
Q8ZM77	Q8ZM77_SALTY	Putative outer membrane protein OS=Salmonella typhimurium (strain LT2 / SGSC1412 / ATCC 700720) GN=STM3052 PE=4 SV=1																0.0092755		0.0092755
Q8ZLP3	Q8ZLP3_SALTY	Cell shape-determining protein MreC OS=Salmonella typhimurium (strain LT2 / SGSC1412 / ATCC 700720) GN=mreC PE=3 SV=1							0.00496322			0.00496322							0.00924154	0.00924154		1.86201
Q8ZKD9	Q8ZKD9_SALTY	Transcriptional regulatory protein OS=Salmonella typhimurium (strain LT2 / SGSC1412 / ATCC 700720) GN=dcuR PE=4 SV=1																	0.00911922	0.00911922
Q7CQE1	Q7CQE1_SALTY	Putative outer membrane protein OS=Salmonella typhimurium (strain LT2 / SGSC1412 / ATCC 700720) GN=slp PE=4 SV=1																	0.00910162	0.00910162
Q8ZK17	Q8ZK17_SALTY	Putative Mrr restriction endonuclease OS=Salmonella typhimurium (strain LT2 / SGSC1412 / ATCC 700720) GN=STM4490 PE=4 SV=1							0.00463528			0.00463528						0.00906051	0.00899644	0.00902847	4.53006e-05	1.94777
Q7CQS0	Q7CQS0_SALTY	PhoB-dependent ATP-binding pho regulon component OS=Salmonella typhimurium (strain LT2 / SGSC1412 / ATCC 700720) GN=phoH PE=4 SV=1																0.00902278		0.00902278
Q8ZNU9	Q8ZNU9_SALTY	Putative cytoplasmic protein OS=Salmonella typhimurium (strain LT2 / SGSC1412 / ATCC 700720) GN=yecM PE=4 SV=1						0.00390065				0.00390065					0.0112625		0.0062781	0.00877032	0.00352454	2.24843
Q8ZND4	Q8ZND4_SALTY	Putative transketolase OS=Salmonella typhimurium (strain LT2 / SGSC1412 / ATCC 700720) GN=STM2341 PE=4 SV=1																	0.00874115	0.00874115
P36638	SAPF_SALTY	Peptide transport system ATP-binding protein SapF OS=Salmonella typhimurium (strain LT2 / SGSC1412 / ATCC 700720) GN=sapF PE=3 SV=1																0.00867461		0.00867461
P0A2M9	SPVC_SALTY	MAPK phosphothreonine lyase OS=Salmonella typhimurium (strain LT2 / SGSC1412 / ATCC 700720) GN=spvC PE=1 SV=2																	0.0086684	0.0086684
Q8ZQ13	Q8ZQ13_SALTY	Putative periplasmic solute-binding protein OS=Salmonella typhimurium (strain LT2 / SGSC1412 / ATCC 700720) GN=yceG PE=4 SV=1								0.02705	0.0155732	0.0213116	0.00811527					0.00859598		0.00859598		0.403347
O33799	HPRT_SALTY	Hypoxanthine phosphoribosyltransferase OS=Salmonella typhimurium (strain LT2 / SGSC1412 / ATCC 700720) GN=hpt PE=1 SV=2															0.0069222		0.0102029	0.00856258	0.00231983
Q8ZNP1	YEGS_SALTY	Probable lipid kinase YegS OS=Salmonella typhimurium (strain LT2 / SGSC1412 / ATCC 700720) GN=yegS PE=1 SV=1							0.0107085			0.0107085					0.00850927			0.00850927		0.794625
Q8ZMY5	Q8ZMY5_SALTY	Gifsy-1 prophage protein OS=Salmonella typhimurium (strain LT2 / SGSC1412 / ATCC 700720) GN=STM2617 PE=4 SV=1						0.00715836				0.00715836					0.00849627			0.00849627		1.1869
P0A1F0	DDLA_SALTY	D-alanine--D-alanine ligase A OS=Salmonella typhimurium (strain LT2 / SGSC1412 / ATCC 700720) GN=ddlA PE=1 SV=2							0.0219657	0.0241425	0.0263216	0.0241433	0.00217798				0.0083615			0.0083615		0.346328
Q9L6L1	HEMG_SALTY	Protoporphyrinogen IX dehydrogenase [menaquinone] OS=Salmonella typhimurium (strain LT2 / SGSC1412 / ATCC 700720) GN=hemG PE=3 SV=1															0.00825274			0.00825274
Q7CPP0	Q7CPP0_SALTY	Lipopolysaccharide export system protein LptC OS=Salmonella typhimurium (strain LT2 / SGSC1412 / ATCC 700720) GN=yrbK PE=3 SV=1															0.0121161		0.00353195	0.00782401	0.00606989
P26419	FLIN_SALTY	Flagellar motor switch protein FliN OS=Salmonella typhimurium (strain LT2 / SGSC1412 / ATCC 700720) GN=fliN PE=1 SV=1																	0.00772739	0.00772739
H9L456	H9L456_SALTY	SinH OS=Salmonella typhimurium (strain LT2 / SGSC1412 / ATCC 700720) GN=sinH PE=4 SV=1															0.00754698			0.00754698
Q8ZR71	Q8ZR71_SALTY	N5-carboxyaminoimidazole ribonucleotide synthase OS=Salmonella typhimurium (strain LT2 / SGSC1412 / ATCC 700720) GN=purK PE=3 SV=1															0.00737143			0.00737143
Q8ZLB8	BCSC_SALTY	Cellulose synthase operon protein C OS=Salmonella typhimurium (strain LT2 / SGSC1412 / ATCC 700720) GN=bcsC PE=3 SV=3															0.00720002			0.00720002
Q8ZKA9	Q8ZKA9_SALTY	Putative arginine-binding periplasmic protein OS=Salmonella typhimurium (strain LT2 / SGSC1412 / ATCC 700720) GN=STM4351 PE=1 SV=1																0.00716923		0.00716923
Q8ZRR1	PANC_SALTY	Pantothenate synthetase OS=Salmonella typhimurium (strain LT2 / SGSC1412 / ATCC 700720) GN=panC PE=1 SV=1							0.0186034	0.0198191		0.0192113	0.000859659						0.00715425	0.00715425		0.372399
Q8ZLQ7	NANE2_SALTY	Putative N-acetylmannosamine-6-phosphate 2-epimerase 2 OS=Salmonella typhimurium (strain LT2 / SGSC1412 / ATCC 700720) GN=nanE2 PE=1 SV=1																	0.00713016	0.00713016
O87663	YADU_SALTY	Uncharacterized protein YadU OS=Salmonella typhimurium (strain LT2 / SGSC1412 / ATCC 700720) GN=yadU PE=3 SV=2															0.00666094			0.00666094
Q7CP89	Q7CP89_SALTY	Putative hemolysin-related protein OS=Salmonella typhimurium (strain LT2 / SGSC1412 / ATCC 700720) GN=ytfL PE=4 SV=1						0.0275519	0.0176262	0.0262786	0.0216948	0.0232879	0.00453575						0.00660845	0.00660845		0.283772
P22038	TRMA_SALTY	tRNA/tmRNA (uracil-C(5))-methyltransferase OS=Salmonella typhimurium (strain LT2 / SGSC1412 / ATCC 700720) GN=trmA PE=2 SV=2																0.00634608		0.00634608
Q7CQZ8	Q7CQZ8_SALTY	Putative cytoplasmic protein OS=Salmonella typhimurium (strain LT2 / SGSC1412 / ATCC 700720) GN=ybdD PE=4 SV=1																0.00630881		0.00630881
P17424	RIR4_SALTY	Ribonucleoside-diphosphate reductase 2 subunit beta OS=Salmonella typhimurium (strain LT2 / SGSC1412 / ATCC 700720) GN=nrdF PE=1 SV=2							0.0270943			0.0270943					0.00628265			0.00628265		0.231881
Q8ZMK9	Q8ZMK9_SALTY	Multidrug resistance secretion protein OS=Salmonella typhimurium (strain LT2 / SGSC1412 / ATCC 700720) GN=emrA PE=4 SV=1																0.00587883		0.00587883
Q8ZLV5	Q8ZLV5_SALTY	Aga operon transcriptional repressor OS=Salmonella typhimurium (strain LT2 / SGSC1412 / ATCC 700720) GN=agaR PE=4 SV=1																	0.00587222	0.00587222
Q8ZRS2	CUEO_SALTY	Blue copper oxidase CueO OS=Salmonella typhimurium (strain LT2 / SGSC1412 / ATCC 700720) GN=cueO PE=3 SV=1							0.0105732			0.0105732					0.00576249			0.00576249		0.545008
Q8ZP11	YCGL_SALTY	Protein YcgL OS=Salmonella typhimurium (strain LT2 / SGSC1412 / ATCC 700720) GN=ycgL PE=3 SV=1																0.00541249		0.00541249
P08982	ENVZ_SALTY	Osmolarity sensor protein EnvZ OS=Salmonella typhimurium (strain LT2 / SGSC1412 / ATCC 700720) GN=envZ PE=3 SV=2								0.0064936		0.0064936							0.00516147	0.00516147		0.794856
H9L4B4	H9L4B4_SALTY	Putative cytoplasmic protein OS=Salmonella typhimurium (strain LT2 / SGSC1412 / ATCC 700720) GN=STM0148 PE=3 SV=1																0.00512068		0.00512068
Q8ZLG5	GLGB_SALTY	1,4-alpha-glucan branching enzyme GlgB OS=Salmonella typhimurium (strain LT2 / SGSC1412 / ATCC 700720) GN=glgB PE=3 SV=1								0.0130048		0.0130048					0.00501418			0.00501418		0.385565
P16326	FLGL_SALTY	Flagellar hook-associated protein 3 OS=Salmonella typhimurium (strain LT2 / SGSC1412 / ATCC 700720) GN=flgL PE=1 SV=1															0.00488355			0.00488355
P0A1C9	EUTL_SALTY	Ethanolamine utilization protein EutL OS=Salmonella typhimurium (strain LT2 / SGSC1412 / ATCC 700720) GN=eutL PE=3 SV=1																0.00476751		0.00476751
Q8ZNF6	Q8ZNF6_SALTY	Putative inner membrane protein OS=Salmonella typhimurium (strain LT2 / SGSC1412 / ATCC 700720) GN=yfaZ PE=4 SV=1																0.00754785	0.00186629	0.00470707	0.00401747
P16328	FLID_SALTY	Flagellar hook-associated protein 2 OS=Salmonella typhimurium (strain LT2 / SGSC1412 / ATCC 700720) GN=fliD PE=1 SV=2																	0.0046634	0.0046634
Q8ZPS2	Q8ZPS2_SALTY	Plant pathogenicity factor-like protein OS=Salmonella typhimurium (strain LT2 / SGSC1412 / ATCC 700720) GN=ydiD PE=4 SV=1															0.00460751			0.00460751
Q8ZLR3	Q8ZLR3_SALTY	Glutamate synthase, small subunit OS=Salmonella typhimurium (strain LT2 / SGSC1412 / ATCC 700720) GN=gltD PE=4 SV=1						0.0247372			0.0115931	0.0181651	0.00929427						0.00433675	0.00433675		0.23874
Q8ZPM5	Q8ZPM5_SALTY	Endonuclease III OS=Salmonella typhimurium (strain LT2 / SGSC1412 / ATCC 700720) GN=nth PE=3 SV=1																	0.00432934	0.00432934
P40815	T3RE_SALTY	Type III restriction-modification system StyLTI enzyme res OS=Salmonella typhimurium (strain LT2 / SGSC1412 / ATCC 700720) GN=res PE=3 SV=2															0.00412401			0.00412401
Q8ZK06	Q8ZK06_SALTY	Putative cytoplasmic protein OS=Salmonella typhimurium (strain LT2 / SGSC1412 / ATCC 700720) GN=STM4502 PE=4 SV=1																	0.00382987	0.00382987
Q8ZNV1	CMOB_SALTY	tRNA (mo5U34)-methyltransferase OS=Salmonella typhimurium (strain LT2 / SGSC1412 / ATCC 700720) GN=cmoB PE=1 SV=1							0.0324692			0.0324692							0.00376454	0.00376454		0.115942
Q8ZRK9	Q8ZRK9_SALTY	Putative RHS-family protein OS=Salmonella typhimurium (strain LT2 / SGSC1412 / ATCC 700720) GN=STM0292 PE=4 SV=1															0.00356188			0.00356188
Q8ZKH2	Q8ZKH2_SALTY	Putative inner membrane protein OS=Salmonella typhimurium (strain LT2 / SGSC1412 / ATCC 700720) GN=STM4252 PE=4 SV=1																	0.00355929	0.00355929
Q93GP7	SSB2_SALTY	Single-stranded DNA-binding protein 2 OS=Salmonella typhimurium (strain LT2 / SGSC1412 / ATCC 700720) GN=ssb2 PE=3 SV=1																0.00332849		0.00332849
Q8ZQ88	Q8ZQ88_SALTY	Gifsy-2 prophage probable minor tail protein OS=Salmonella typhimurium (strain LT2 / SGSC1412 / ATCC 700720) GN=STM1039 PE=4 SV=1																	0.0026507	0.0026507
Q7CQD7	Q7CQD7_SALTY	Putative penicillin-binding protein-3 OS=Salmonella typhimurium (strain LT2 / SGSC1412 / ATCC 700720) GN=STM1836 PE=4 SV=1															0.0025795			0.0025795
Q8ZPL4	Q8ZPL4_SALTY	Outer membrane protein N OS=Salmonella typhimurium (strain LT2 / SGSC1412 / ATCC 700720) GN=ompN PE=4 SV=1																	0.00239031	0.00239031
Q8ZMV7	Q8ZMV7_SALTY	Putative HlyD family secretion protein OS=Salmonella typhimurium (strain LT2 / SGSC1412 / ATCC 700720) GN=STM2692 PE=4 SV=1																0.00216081		0.00216081
P19566	MALK_SALTY	Maltose/maltodextrin import ATP-binding protein MalK OS=Salmonella typhimurium (strain LT2 / SGSC1412 / ATCC 700720) GN=malK PE=1 SV=3							0.414372			0.414372
Q8ZKS2	Q8ZKS2_SALTY	Putative iron-containing alcohol dehydrogenase OS=Salmonella typhimurium (strain LT2 / SGSC1412 / ATCC 700720) GN=STM4044 PE=4 SV=1								0.272182		0.272182
Q9L6N1	METE_SALTY	5-methyltetrahydropteroyltriglutamate--homocysteine methyltransferase OS=Salmonella typhimurium (strain LT2 / SGSC1412 / ATCC 700720) GN=metE PE=3 SV=3						0.172575	0.155376	0.186529	0.153135	0.166904	0.0157036
P0A1A9	EX3_SALTY	Exodeoxyribonuclease III OS=Salmonella typhimurium (strain LT2 / SGSC1412 / ATCC 700720) GN=xthA PE=3 SV=1							0.159094			0.159094
Q7CQF1	Q7CQF1_SALTY	Regulator of RpoS OS=Salmonella typhimurium (strain LT2 / SGSC1412 / ATCC 700720) GN=hnr PE=3 SV=1							0.14718			0.14718
Q8ZRV8	RAPA_SALTY	RNA polymerase-associated protein RapA OS=Salmonella typhimurium (strain LT2 / SGSC1412 / ATCC 700720) GN=rapA PE=3 SV=3							0.266442	0.0342515	0.0708942	0.123863	0.124829
Q8ZL79	Q8ZL79_SALTY	Putative dicarboxylate-binding periplasmic protein OS=Salmonella typhimurium (strain LT2 / SGSC1412 / ATCC 700720) GN=yiaO PE=4 SV=1							0.123111			0.123111
Q7CPS0	Q7CPS0_SALTY	Putative glutathionylspermidine synthase OS=Salmonella typhimurium (strain LT2 / SGSC1412 / ATCC 700720) GN=ygiC PE=4 SV=1									0.119508	0.119508
Q7CQ25	NUDK_SALTY	GDP-mannose pyrophosphatase NudK OS=Salmonella typhimurium (strain LT2 / SGSC1412 / ATCC 700720) GN=nudK PE=3 SV=1								0.107142		0.107142
P0A7P8	RL34_SALTY	50S ribosomal protein L34 OS=Salmonella typhimurium (strain LT2 / SGSC1412 / ATCC 700720) GN=rpmH PE=3 SV=1							0.102337			0.102337
P37586	METH_SALTY	Methionine synthase OS=Salmonella typhimurium (strain LT2 / SGSC1412 / ATCC 700720) GN=metH PE=3 SV=3							0.100764			0.100764
Q8ZLH9	Q8ZLH9_SALTY	RNA-splicing ligase RtcB OS=Salmonella typhimurium (strain LT2 / SGSC1412 / ATCC 700720) GN=rtcB PE=3 SV=1							0.0919634			0.0919634
Q8ZQV1	Q8ZQV1_SALTY	Putative ABC-type polysaccharide/polyol phosphate transport system, ATPase component OS=Salmonella typhimurium (strain LT2 / SGSC1412 / ATCC 700720) GN=STM0723 PE=4 SV=1								0.0899236		0.0899236
P22494	UMUC_SALTY	Protein UmuC OS=Salmonella typhimurium (strain LT2 / SGSC1412 / ATCC 700720) GN=umuC PE=3 SV=1							0.0865531			0.0865531
H9L423	H9L423_SALTY	Gifsy-2 prophage probable minor tail protein OS=Salmonella typhimurium (strain LT2 / SGSC1412 / ATCC 700720) GN=STM1042 PE=4 SV=1						0.0796451				0.0796451
Q8ZNI9	Q8ZNI9_SALTY	Putative phage protein OS=Salmonella typhimurium (strain LT2 / SGSC1412 / ATCC 700720) GN=STM2236 PE=4 SV=1								0.072613		0.072613
Q8ZQC5	Q8ZQC5_SALTY	Putative Zn-dependent protease with chaperone function OS=Salmonella typhimurium (strain LT2 / SGSC1412 / ATCC 700720) GN=ycaL PE=3 SV=1									0.0725505	0.0725505
Q8ZN68	Q8ZN68_SALTY	Arsenate reductase OS=Salmonella typhimurium (strain LT2 / SGSC1412 / ATCC 700720) GN=yfgD PE=3 SV=1							0.0716218			0.0716218
P15931	FLGJ_SALTY	Peptidoglycan hydrolase FlgJ OS=Salmonella typhimurium (strain LT2 / SGSC1412 / ATCC 700720) GN=flgJ PE=1 SV=1									0.0704918	0.0704918
Q9L6M0	UBID_SALTY	3-octaprenyl-4-hydroxybenzoate carboxy-lyase OS=Salmonella typhimurium (strain LT2 / SGSC1412 / ATCC 700720) GN=ubiD PE=3 SV=1						0.112008	0.0244601			0.0682341	0.0619058
P17328	PROV_SALTY	Glycine betaine/L-proline transport ATP-binding protein ProV OS=Salmonella typhimurium (strain LT2 / SGSC1412 / ATCC 700720) GN=proV PE=3 SV=2							0.0669353			0.0669353
P66296	RL362_SALTY	50S ribosomal protein L36 2 OS=Salmonella typhimurium (strain LT2 / SGSC1412 / ATCC 700720) GN=rpmJ2 PE=3 SV=1							0.0665954			0.0665954
Q8ZK44	Q8ZK44_SALTY	Putative dihydroorotase OS=Salmonella typhimurium (strain LT2 / SGSC1412 / ATCC 700720) GN=STM4445 PE=4 SV=1								0.0657347		0.0657347
Q8ZKJ3	Q8ZKJ3_SALTY	Putative phage tail core protein OS=Salmonella typhimurium (strain LT2 / SGSC1412 / ATCC 700720) GN=STM4212 PE=4 SV=1									0.0655965	0.0655965
Q8ZPS9	SYT_SALTY	Threonine--tRNA ligase OS=Salmonella typhimurium (strain LT2 / SGSC1412 / ATCC 700720) GN=thrS PE=3 SV=1							0.0678705	0.0589145	0.0685639	0.0651163	0.0053821
Q8ZN19	PDXJ_SALTY	Pyridoxine 5'-phosphate synthase OS=Salmonella typhimurium (strain LT2 / SGSC1412 / ATCC 700720) GN=pdxJ PE=3 SV=2									0.0635379	0.0635379
Q8ZME2	Q8ZME2_SALTY	(P)ppGpp synthetase I OS=Salmonella typhimurium (strain LT2 / SGSC1412 / ATCC 700720) GN=relA PE=3 SV=1						0.0560529	0.0563155			0.0561842	0.000185672
Q8ZNC2	Q8ZNC2_SALTY	Amidophosphoribosyltransferase OS=Salmonella typhimurium (strain LT2 / SGSC1412 / ATCC 700720) GN=purF PE=3 SV=1							0.048888	0.0552444	0.0564068	0.0535131	0.00404737
Q8ZRS4	SPED_SALTY	S-adenosylmethionine decarboxylase proenzyme OS=Salmonella typhimurium (strain LT2 / SGSC1412 / ATCC 700720) GN=speD PE=3 SV=1							0.0525225			0.0525225
Q8ZQY0	Q8ZQY0_SALTY	Asparagine synthetase B OS=Salmonella typhimurium (strain LT2 / SGSC1412 / ATCC 700720) GN=asnB PE=4 SV=1							0.0508705			0.0508705
P74881	PUR4_SALTY	Phosphoribosylformylglycinamidine synthase OS=Salmonella typhimurium (strain LT2 / SGSC1412 / ATCC 700720) GN=purL PE=1 SV=3							0.0590842	0.0435051	0.0487757	0.050455	0.00792413
Q8ZS19	Q8ZS19_SALTY	Aspartokinase I OS=Salmonella typhimurium (strain LT2 / SGSC1412 / ATCC 700720) GN=thrA PE=4 SV=1							0.0422748	0.0585849	0.0437983	0.0482193	0.00900914
Q7CP97	Q7CP97_SALTY	Fumarate reductase flavoprotein subunit OS=Salmonella typhimurium (strain LT2 / SGSC1412 / ATCC 700720) GN=frdA PE=3 SV=1							0.0462958			0.0462958
Q8ZLV8	Q8ZLV8_SALTY	Tartronate semialdehyde reductase (TSAR) OS=Salmonella typhimurium (strain LT2 / SGSC1412 / ATCC 700720) GN=garR PE=1 SV=1							0.0461655			0.0461655
P0A2I1	TOP1_SALTY	DNA topoisomerase 1 OS=Salmonella typhimurium (strain LT2 / SGSC1412 / ATCC 700720) GN=topA PE=3 SV=1							0.0455418			0.0455418
Q8ZNC0	Q8ZNC0_SALTY	Bifunctional protein FolC OS=Salmonella typhimurium (strain LT2 / SGSC1412 / ATCC 700720) GN=folC PE=3 SV=1								0.0449562		0.0449562
Q8ZRJ8	Q8ZRJ8_SALTY	Putative amidohydrolase OS=Salmonella typhimurium (strain LT2 / SGSC1412 / ATCC 700720) GN=yafV PE=4 SV=1						0.041426				0.041426
P41786	PRGK_SALTY	Lipoprotein PrgK OS=Salmonella typhimurium (strain LT2 / SGSC1412 / ATCC 700720) GN=prgK PE=1 SV=1							0.0413813			0.0413813
Q8ZKH9	PLSB_SALTY	Glycerol-3-phosphate acyltransferase OS=Salmonella typhimurium (strain LT2 / SGSC1412 / ATCC 700720) GN=plsB PE=3 SV=1							0.0294258	0.052996		0.0412109	0.0166667
Q7CPC4	RHAM_SALTY	L-rhamnose mutarotase OS=Salmonella typhimurium (strain LT2 / SGSC1412 / ATCC 700720) GN=rhaM PE=3 SV=1						0.0404726				0.0404726
Q8ZN89	DNLJ_SALTY	DNA ligase OS=Salmonella typhimurium (strain LT2 / SGSC1412 / ATCC 700720) GN=ligA PE=3 SV=1								0.0179292	0.061793	0.0398611	0.0310164
Q8ZKW4	ASNA_SALTY	Aspartate--ammonia ligase OS=Salmonella typhimurium (strain LT2 / SGSC1412 / ATCC 700720) GN=asnA PE=3 SV=1							0.0431777	0.039523	0.0365695	0.0397568	0.00331031
O52325	ARNA_SALTY	Bifunctional polymyxin resistance protein ArnA OS=Salmonella typhimurium (strain LT2 / SGSC1412 / ATCC 700720) GN=arnA PE=2 SV=1						0.064603	0.0231339	0.0435862	0.026724	0.0395118	0.0189555
Q8ZK87	ULAD_SALTY	3-keto-L-gulonate-6-phosphate decarboxylase UlaD OS=Salmonella typhimurium (strain LT2 / SGSC1412 / ATCC 700720) GN=ulaD PE=3 SV=1									0.0393816	0.0393816
Q8ZPQ4	Q8ZPQ4_SALTY	Putative ABC transporter OS=Salmonella typhimurium (strain LT2 / SGSC1412 / ATCC 700720) GN=sufB PE=4 SV=1							0.0387194	0.0360551	0.0348065	0.036527	0.0019987
Q93GS8	Q93GS8_SALTY	DNA replication OS=Salmonella typhimurium (strain LT2 / SGSC1412 / ATCC 700720) GN=repC PE=4 SV=1						0.0360928				0.0360928
Q7CQS8	TUSE_SALTY	Sulfurtransferase TusE OS=Salmonella typhimurium (strain LT2 / SGSC1412 / ATCC 700720) GN=tusE PE=3 SV=1								0.0360492		0.0360492
Q8ZP54	RNB_SALTY	Exoribonuclease 2 OS=Salmonella typhimurium (strain LT2 / SGSC1412 / ATCC 700720) GN=rnb PE=3 SV=1							0.0358109			0.0358109
P65417	MPGP_SALTY	Putative mannosyl-3-phosphoglycerate phosphatase OS=Salmonella typhimurium (strain LT2 / SGSC1412 / ATCC 700720) GN=yedP PE=3 SV=1						0.0357732				0.0357732
Q8ZMN4	Q8ZMN4_SALTY	Putative glycosyl transferase OS=Salmonella typhimurium (strain LT2 / SGSC1412 / ATCC 700720) GN=iroB PE=4 SV=1							0.0215841		0.0491994	0.0353918	0.019527
Q7CQ00	Q7CQ00_SALTY	Ribosome associated factor OS=Salmonella typhimurium (strain LT2 / SGSC1412 / ATCC 700720) GN=yfiA PE=4 SV=1								0.0454762	0.0250986	0.0352874	0.0144091
Q8ZKL6	ARLY_SALTY	Argininosuccinate lyase OS=Salmonella typhimurium (strain LT2 / SGSC1412 / ATCC 700720) GN=argH PE=3 SV=1							0.0258655	0.044384		0.0351247	0.0130945
Q8ZLR0	Q8ZLR0_SALTY	Putative cytosine deaminase OS=Salmonella typhimurium (strain LT2 / SGSC1412 / ATCC 700720) GN=STM3334 PE=4 SV=1								0.0335436		0.0335436
P0A2P0	RHLB_SALTY	ATP-dependent RNA helicase RhlB OS=Salmonella typhimurium (strain LT2 / SGSC1412 / ATCC 700720) GN=rhlB PE=3 SV=2							0.0353456	0.0303388		0.0328422	0.00354036
Q8ZN24	Q8ZN24_SALTY	Putative ABC superfamily transport protein OS=Salmonella typhimurium (strain LT2 / SGSC1412 / ATCC 700720) GN=yfhH PE=4 SV=1							0.0322089			0.0322089
Q8ZQ76	Q8ZQ76_SALTY	Aminopeptidase N OS=Salmonella typhimurium (strain LT2 / SGSC1412 / ATCC 700720) GN=pepN PE=4 SV=1							0.032595		0.0290911	0.030843	0.00247768
P12677	BIOA_SALTY	Adenosylmethionine-8-amino-7-oxononanoate aminotransferase OS=Salmonella typhimurium (strain LT2 / SGSC1412 / ATCC 700720) GN=bioA PE=3 SV=2							0.0303518			0.0303518
Q8ZK11	Q8ZK11_SALTY	Putative ATPase involved in DNA repair OS=Salmonella typhimurium (strain LT2 / SGSC1412 / ATCC 700720) GN=STM4496 PE=4 SV=1							0.0302215			0.0302215
Q8ZL56	GPMI_SALTY	2,3-bisphosphoglycerate-independent phosphoglycerate mutase OS=Salmonella typhimurium (strain LT2 / SGSC1412 / ATCC 700720) GN=gpmI PE=3 SV=1							0.0376445	0.0227842		0.0302143	0.0105078
Q8ZKT2	Q8ZKT2_SALTY	Putative acetyl esterase OS=Salmonella typhimurium (strain LT2 / SGSC1412 / ATCC 700720) GN=STM4032 PE=4 SV=1								0.0301537		0.0301537
P0A293	PRMB_SALTY	50S ribosomal protein L3 glutamine methyltransferase OS=Salmonella typhimurium (strain LT2 / SGSC1412 / ATCC 700720) GN=prmB PE=3 SV=1							0.0297517			0.0297517
Q8ZMA9	TYSY_SALTY	Thymidylate synthase OS=Salmonella typhimurium (strain LT2 / SGSC1412 / ATCC 700720) GN=thyA PE=3 SV=1							0.0267594	0.032694		0.0297267	0.00419644
Q8ZKN5	Q8ZKN5_SALTY	Cystathionine gamma-synthase OS=Salmonella typhimurium (strain LT2 / SGSC1412 / ATCC 700720) GN=metB PE=3 SV=1							0.0305754		0.0288317	0.0297036	0.00123298
Q8ZK67	F16PA_SALTY	Fructose-1,6-bisphosphatase class 1 OS=Salmonella typhimurium (strain LT2 / SGSC1412 / ATCC 700720) GN=fbp PE=3 SV=1							0.0295887			0.0295887
P0A2K1	TRPB_SALTY	Tryptophan synthase beta chain OS=Salmonella typhimurium (strain LT2 / SGSC1412 / ATCC 700720) GN=trpB PE=1 SV=2							0.0294118			0.0294118
Q8ZMD9	Q8ZMD9_SALTY	D-glucarate dehydratase OS=Salmonella typhimurium (strain LT2 / SGSC1412 / ATCC 700720) GN=gudD PE=4 SV=1							0.00633148	0.0212414	0.0596949	0.0290892	0.0275337
Q8ZKL9	ARGE_SALTY	Acetylornithine deacetylase OS=Salmonella typhimurium (strain LT2 / SGSC1412 / ATCC 700720) GN=argE PE=3 SV=1							0.0289976			0.0289976
Q8ZLR4	Q8ZLR4_SALTY	Glutamate synthase, large subunit OS=Salmonella typhimurium (strain LT2 / SGSC1412 / ATCC 700720) GN=gltB PE=4 SV=1							0.024074	0.0395113	0.0233996	0.028995	0.00911366
Q8ZR27	Q8ZR27_SALTY	Putative glycerol dehydrogenase OS=Salmonella typhimurium (strain LT2 / SGSC1412 / ATCC 700720) GN=ybdH PE=4 SV=1							0.0317271		0.0256931	0.0287101	0.00426673
P0A2H7	FADA_SALTY	3-ketoacyl-CoA thiolase OS=Salmonella typhimurium (strain LT2 / SGSC1412 / ATCC 700720) GN=fadA PE=1 SV=1							0.0284882			0.0284882
P0A197	UBIB_SALTY	Probable protein kinase UbiB OS=Salmonella typhimurium (strain LT2 / SGSC1412 / ATCC 700720) GN=ubiB PE=3 SV=1							0.0283388			0.0283388
Q8ZND5	Q8ZND5_SALTY	Putative transketolase OS=Salmonella typhimurium (strain LT2 / SGSC1412 / ATCC 700720) GN=STM2340 PE=4 SV=1						0.0282843				0.0282843
P35891	DNAA_SALTY	Chromosomal replication initiator protein DnaA OS=Salmonella typhimurium (strain LT2 / SGSC1412 / ATCC 700720) GN=dnaA PE=3 SV=2									0.0280052	0.0280052
P0A2M3	YOAH_SALTY	UPF0181 protein YoaH OS=Salmonella typhimurium (strain LT2 / SGSC1412 / ATCC 700720) GN=yoaH PE=3 SV=1								0.0278478		0.0278478
Q8ZMJ4	Q8ZMJ4_SALTY	Putative periplasmic or exported protein OS=Salmonella typhimurium (strain LT2 / SGSC1412 / ATCC 700720) GN=STM2844 PE=4 SV=1								0.0277784		0.0277784
Q8ZPB5	Q8ZPB5_SALTY	Putative oxidase OS=Salmonella typhimurium (strain LT2 / SGSC1412 / ATCC 700720) GN=STM1620 PE=4 SV=1									0.0277426	0.0277426
P66755	RUVB_SALTY	Holliday junction ATP-dependent DNA helicase RuvB OS=Salmonella typhimurium (strain LT2 / SGSC1412 / ATCC 700720) GN=ruvB PE=3 SV=1						0.0272374				0.0272374
Q8ZKN4	Q8ZKN4_SALTY	Aspartokinase II OS=Salmonella typhimurium (strain LT2 / SGSC1412 / ATCC 700720) GN=metL PE=4 SV=1							0.0336329	0.0239926	0.023778	0.0271345	0.0056288
Q9L6L5	FADB_SALTY	Fatty acid oxidation complex subunit alpha OS=Salmonella typhimurium (strain LT2 / SGSC1412 / ATCC 700720) GN=fadB PE=3 SV=1							0.0301427	0.0300556	0.0207764	0.0269916	0.00538265
Q8ZMF5	CYSN_SALTY	Sulfate adenylyltransferase subunit 1 OS=Salmonella typhimurium (strain LT2 / SGSC1412 / ATCC 700720) GN=cysN PE=3 SV=1							0.0265779			0.0265779
Q8ZPA8	Q8ZPA8_SALTY	S-(hydroxymethyl)glutathione dehydrogenase OS=Salmonella typhimurium (strain LT2 / SGSC1412 / ATCC 700720) GN=STM1627 PE=3 SV=1							0.0264801			0.0264801
Q8ZNP5	Q8ZNP5_SALTY	Putative inner membrane protein OS=Salmonella typhimurium (strain LT2 / SGSC1412 / ATCC 700720) GN=STM2135 PE=4 SV=1							0.0256609			0.0256609
P74884	FEOB_SALTY	Ferrous iron transport protein B OS=Salmonella typhimurium (strain LT2 / SGSC1412 / ATCC 700720) GN=feoB PE=3 SV=2							0.0253911			0.0253911
Q7CQX0	Q7CQX0_SALTY	Tol protein, role in outer membrane integrity OS=Salmonella typhimurium (strain LT2 / SGSC1412 / ATCC 700720) GN=tolR PE=3 SV=1							0.0252698			0.0252698
Q8ZLI5	Q8ZLI5_SALTY	4-alpha-glucanotransferase OS=Salmonella typhimurium (strain LT2 / SGSC1412 / ATCC 700720) GN=malQ PE=3 SV=1						0.0309965			0.0189526	0.0249745	0.00851632
Q935S7	MUKB_SALTY	Chromosome partition protein MukB OS=Salmonella typhimurium (strain LT2 / SGSC1412 / ATCC 700720) GN=mukB PE=3 SV=1							0.024972			0.024972
Q8ZNQ7	Q8ZNQ7_SALTY	Suppressor of ompF assembly mutants OS=Salmonella typhimurium (strain LT2 / SGSC1412 / ATCC 700720) GN=asmA PE=4 SV=1							0.0248697			0.0248697
Q8ZLJ1	Q8ZLJ1_SALTY	Putative RNase R OS=Salmonella typhimurium (strain LT2 / SGSC1412 / ATCC 700720) GN=yhgF PE=4 SV=1							0.026066	0.0244491	0.0228324	0.0244492	0.00161677
Q8ZQR4	6PGL_SALTY	6-phosphogluconolactonase OS=Salmonella typhimurium (strain LT2 / SGSC1412 / ATCC 700720) GN=pgl PE=3 SV=1							0.0243623			0.0243623
Q8ZR97	Q8ZR97_SALTY	Putative cytoplasmic protein OS=Salmonella typhimurium (strain LT2 / SGSC1412 / ATCC 700720) GN=ybaP PE=4 SV=1								0.0243622		0.0243622
Q8ZKW6	MNMG_SALTY	tRNA uridine 5-carboxymethylaminomethyl modification enzyme MnmG OS=Salmonella typhimurium (strain LT2 / SGSC1412 / ATCC 700720) GN=mnmG PE=3 SV=1							0.0242415			0.0242415
Q8ZQ10	Q8ZQ10_SALTY	Outer membrane receptor for Fe(III)-coprogen OS=Salmonella typhimurium (strain LT2 / SGSC1412 / ATCC 700720) GN=fhuE PE=3 SV=1								0.0238305		0.0238305
Q8ZQQ4	UVRB_SALTY	UvrABC system protein B OS=Salmonella typhimurium (strain LT2 / SGSC1412 / ATCC 700720) GN=uvrB PE=3 SV=1								0.0236167		0.0236167
Q8ZR32	Q8ZR32_SALTY	2,3-dihydroxybenzoate-AMP ligase OS=Salmonella typhimurium (strain LT2 / SGSC1412 / ATCC 700720) GN=entE PE=4 SV=1							0.0232923			0.0232923
Q9L6R0	Q9L6R0_SALTY	92% identity with E. coli lipopolysaccharide biosynthesis protein (WECE) (SP:P27833); contains similarity to Pfam family PF01041 (DegT/DnrJ/EryC1/StrS family), score=295.0, E=9.2e-85, N=1 OS=Salmonella typhimurium (strain LT2 / SGSC1412 / ATCC 700720) GN=							0.0231619			0.0231619
Q8ZQ73	RLMKL_SALTY	Ribosomal RNA large subunit methyltransferase K/L OS=Salmonella typhimurium (strain LT2 / SGSC1412 / ATCC 700720) GN=rlmL PE=3 SV=1							0.0230502			0.0230502
Q8ZKV9	RBSA_SALTY	Ribose import ATP-binding protein RbsA OS=Salmonella typhimurium (strain LT2 / SGSC1412 / ATCC 700720) GN=rbsA PE=3 SV=1							0.0118487		0.0335925	0.0227206	0.0153752
Q8ZL47	Q8ZL47_SALTY	Flavoprotein OS=Salmonella typhimurium (strain LT2 / SGSC1412 / ATCC 700720) GN=dfp PE=4 SV=1							0.0225964	0.0224434		0.0225199	0.000108173
P07637	AROA_SALTY	3-phosphoshikimate 1-carboxyvinyltransferase OS=Salmonella typhimurium (strain LT2 / SGSC1412 / ATCC 700720) GN=aroA PE=3 SV=2							0.0225057			0.0225057
Q8ZMB8	ARGA_SALTY	Amino-acid acetyltransferase OS=Salmonella typhimurium (strain LT2 / SGSC1412 / ATCC 700720) GN=argA PE=3 SV=1							0.0224916			0.0224916
Q8ZLQ3	Q8ZLQ3_SALTY	Cell division protein ZapE OS=Salmonella typhimurium (strain LT2 / SGSC1412 / ATCC 700720) GN=yhcM PE=3 SV=1							0.0221752			0.0221752
Q8ZKP5	Q8ZKP5_SALTY	Ferredoxin-NADP reductase OS=Salmonella typhimurium (strain LT2 / SGSC1412 / ATCC 700720) GN=fpr PE=1 SV=1							0.0216262			0.0216262
P40810	ILVD_SALTY	Dihydroxy-acid dehydratase OS=Salmonella typhimurium (strain LT2 / SGSC1412 / ATCC 700720) GN=ilvD PE=3 SV=2						0.018911	0.0214773	0.0240561		0.0214815	0.00257253
Q8ZJW6	RSMC_SALTY	Ribosomal RNA small subunit methyltransferase C OS=Salmonella typhimurium (strain LT2 / SGSC1412 / ATCC 700720) GN=rsmC PE=3 SV=1							0.0213375			0.0213375
Q8ZRE1	Q8ZRE1_SALTY	Histidine kinase OS=Salmonella typhimurium (strain LT2 / SGSC1412 / ATCC 700720) GN=phoR PE=4 SV=1							0.0213189			0.0213189
Q8ZNC1	Q8ZNC1_SALTY	Putative lipoprotein OS=Salmonella typhimurium (strain LT2 / SGSC1412 / ATCC 700720) GN=dedD PE=4 SV=1							0.0212492			0.0212492
P37413	META_SALTY	Homoserine O-succinyltransferase OS=Salmonella typhimurium (strain LT2 / SGSC1412 / ATCC 700720) GN=metA PE=3 SV=4							0.0210537			0.0210537
P0A2D7	TYRR_SALTY	Transcriptional regulatory protein TyrR OS=Salmonella typhimurium (strain LT2 / SGSC1412 / ATCC 700720) GN=tyrR PE=3 SV=1								0.0210417		0.0210417
P37412	LEU3_SALTY	3-isopropylmalate dehydrogenase OS=Salmonella typhimurium (strain LT2 / SGSC1412 / ATCC 700720) GN=leuB PE=1 SV=2							0.020998			0.020998
Q8ZS03	Q8ZS03_SALTY	Putative thiol-disulfide isomerase OS=Salmonella typhimurium (strain LT2 / SGSC1412 / ATCC 700720) GN=bcfH PE=4 SV=1									0.0208986	0.0208986
P74856	SSAV_SALTY	Secretion system apparatus protein SsaV OS=Salmonella typhimurium (strain LT2 / SGSC1412 / ATCC 700720) GN=ssaV PE=1 SV=1							0.0207839			0.0207839
Q8ZLH6	Q8ZLH6_SALTY	Transcriptional repressor of the glp operon OS=Salmonella typhimurium (strain LT2 / SGSC1412 / ATCC 700720) GN=glpR PE=4 SV=1						0.0207041				0.0207041
P55882	THID_SALTY	Hydroxymethylpyrimidine/phosphomethylpyrimidine kinase OS=Salmonella typhimurium (strain LT2 / SGSC1412 / ATCC 700720) GN=thiD PE=1 SV=2							0.0301984	0.0111377		0.0206681	0.0134779
Q08698	RIR3_SALTY	Ribonucleoside-diphosphate reductase 2 subunit alpha OS=Salmonella typhimurium (strain LT2 / SGSC1412 / ATCC 700720) GN=nrdE PE=1 SV=2							0.0240133		0.0172018	0.0206076	0.00481649
Q7CR80	Q7CR80_SALTY	Cell division protein ftsA OS=Salmonella typhimurium (strain LT2 / SGSC1412 / ATCC 700720) GN=ftsA PE=3 SV=1							0.0204951			0.0204951
Q8ZRU7	MURE_SALTY	UDP-N-acetylmuramoyl-L-alanyl-D-glutamate--2,6-diaminopimelate ligase OS=Salmonella typhimurium (strain LT2 / SGSC1412 / ATCC 700720) GN=murE PE=3 SV=1							0.0128024	0.022897	0.0252267	0.0203087	0.00660419
P12678	BIOB_SALTY	Biotin synthase OS=Salmonella typhimurium (strain LT2 / SGSC1412 / ATCC 700720) GN=bioB PE=3 SV=2							0.0200669			0.0200669
Q8ZME4	Q8ZME4_SALTY	Putative pyrophosphatase OS=Salmonella typhimurium (strain LT2 / SGSC1412 / ATCC 700720) GN=mazG PE=4 SV=1								0.0199231		0.0199231
P05415	GLGC_SALTY	Glucose-1-phosphate adenylyltransferase OS=Salmonella typhimurium (strain LT2 / SGSC1412 / ATCC 700720) GN=glgC PE=3 SV=2							0.0196714			0.0196714
Q8ZMX0	Q8ZMX0_SALTY	Putative cytoplasmic protein OS=Salmonella typhimurium (strain LT2 / SGSC1412 / ATCC 700720) GN=STM2655 PE=4 SV=1								0.0194725		0.0194725
P26402	RFBU_SALTY	Protein RfbU OS=Salmonella typhimurium (strain LT2 / SGSC1412 / ATCC 700720) GN=rfbU PE=3 SV=1								0.0194119		0.0194119
Q8ZRB5	Q8ZRB5_SALTY	Putative cysteine synthase/cystathionine beta-synthase OS=Salmonella typhimurium (strain LT2 / SGSC1412 / ATCC 700720) GN=STM0458 PE=4 SV=1							0.019383			0.019383
Q8ZMN3	Q8ZMN3_SALTY	Putative ATP binding cassette (ABC) transporter OS=Salmonella typhimurium (strain LT2 / SGSC1412 / ATCC 700720) GN=iroC PE=3 SV=1							0.0192572		0.0194163	0.0193367	0.000112472
Q9L6L8	Q9L6L8_SALTY	Putative outer membrane protein OS=Salmonella typhimurium (strain LT2 / SGSC1412 / ATCC 700720) GN=STMD1.9 PE=4 SV=1						0.0190796				0.0190796
Q8ZRQ8	PCNB_SALTY	Poly(A) polymerase I OS=Salmonella typhimurium (strain LT2 / SGSC1412 / ATCC 700720) GN=pcnB PE=3 SV=2							0.0189408			0.0189408
P40813	T1M_SALTY	Type I restriction enzyme StySJI M protein OS=Salmonella typhimurium (strain LT2 / SGSC1412 / ATCC 700720) GN=hsdM PE=3 SV=1							0.0203928		0.0173421	0.0188675	0.00215715
Q8ZL15	Q8ZL15_SALTY	Acetolactate synthase OS=Salmonella typhimurium (strain LT2 / SGSC1412 / ATCC 700720) GN=ilvB PE=3 SV=1							0.0188546			0.0188546
Q8ZPV5	SELD_SALTY	Selenide, water dikinase OS=Salmonella typhimurium (strain LT2 / SGSC1412 / ATCC 700720) GN=selD PE=3 SV=1						0.0219608	0.0156647			0.0188127	0.00445196
P0A1P2	GPDA_SALTY	Glycerol-3-phosphate dehydrogenase [NAD(P)+] OS=Salmonella typhimurium (strain LT2 / SGSC1412 / ATCC 700720) GN=gpsA PE=3 SV=1							0.0187222			0.0187222
Q7CPM4	Q7CPM4_SALTY	RNase G OS=Salmonella typhimurium (strain LT2 / SGSC1412 / ATCC 700720) GN=cafA PE=4 SV=1							0.0199366		0.0174948	0.0187157	0.00172664
Q8ZM00	Q8ZM00_SALTY	Putative bacterial regulatory helix-turn-helix protein OS=Salmonella typhimurium (strain LT2 / SGSC1412 / ATCC 700720) GN=STM3175 PE=4 SV=1							0.0185824			0.0185824
Q8ZKR1	Q8ZKR1_SALTY	Putative ADP-ribosylglycohydrolase OS=Salmonella typhimurium (strain LT2 / SGSC1412 / ATCC 700720) GN=STM4067 PE=4 SV=1							0.0185221			0.0185221
P26973	PARC_SALTY	DNA topoisomerase 4 subunit A OS=Salmonella typhimurium (strain LT2 / SGSC1412 / ATCC 700720) GN=parC PE=3 SV=2							0.0203648	0.0158717		0.0181182	0.00317707
Q7CQ56	MENB_SALTY	1,4-dihydroxy-2-naphthoyl-CoA synthase OS=Salmonella typhimurium (strain LT2 / SGSC1412 / ATCC 700720) GN=menB PE=1 SV=1							0.0179962			0.0179962
Q8ZP21	Q8ZP21_SALTY	Glutamate dehydrogenase OS=Salmonella typhimurium (strain LT2 / SGSC1412 / ATCC 700720) GN=STM1795 PE=3 SV=1								0.0225762	0.0131576	0.0178669	0.00665996
Q7CQW6	Q7CQW6_SALTY	Molybdenum cofactor biosynthesis protein B OS=Salmonella typhimurium (strain LT2 / SGSC1412 / ATCC 700720) GN=moaB PE=3 SV=1							0.0178634			0.0178634
P65792	PROB_SALTY	Glutamate 5-kinase OS=Salmonella typhimurium (strain LT2 / SGSC1412 / ATCC 700720) GN=proB PE=3 SV=1							0.0178564			0.0178564
Q8ZQN0	Q8ZQN0_SALTY	Putative ATPase component of ABC transporter with duplicated ATPase domain OS=Salmonella typhimurium (strain LT2 / SGSC1412 / ATCC 700720) GN=ybiT PE=4 SV=1							0.0175028			0.0175028
Q8ZPJ7	Q8ZPJ7_SALTY	Putative dimethyl sulphoxide reductase OS=Salmonella typhimurium (strain LT2 / SGSC1412 / ATCC 700720) GN=STM1498 PE=4 SV=1									0.0174217	0.0174217
Q7CQ54	Q7CQ54_SALTY	Putative acyltransferase OS=Salmonella typhimurium (strain LT2 / SGSC1412 / ATCC 700720) GN=elaA PE=4 SV=1							0.017382			0.017382
Q8ZMG4	Q8ZMG4_SALTY	3-hydroxyisobutyrate dehydrogenase OS=Salmonella typhimurium (strain LT2 / SGSC1412 / ATCC 700720) GN=ygbJ PE=1 SV=1								0.0173281		0.0173281
Q8ZLG7	Q8ZLG7_SALTY	Alpha-1,4 glucan phosphorylase OS=Salmonella typhimurium (strain LT2 / SGSC1412 / ATCC 700720) GN=glgP PE=3 SV=1							0.0172005			0.0172005
Q8ZPW2	Q8ZPW2_SALTY	Putative Ser protein kinase OS=Salmonella typhimurium (strain LT2 / SGSC1412 / ATCC 700720) GN=yeaG PE=4 SV=1							0.0171167			0.0171167
Q8ZM57	Q8ZM57_SALTY	Putative gntR family regulatory protein OS=Salmonella typhimurium (strain LT2 / SGSC1412 / ATCC 700720) GN=STM3084 PE=4 SV=1							0.0170747			0.0170747
Q8ZKC1	Q8ZKC1_SALTY	Suppresses F exclusion of bacteriophage T7 OS=Salmonella typhimurium (strain LT2 / SGSC1412 / ATCC 700720) GN=fxsA PE=4 SV=1							0.016493			0.016493
Q8ZR23	Q8ZR23_SALTY	Putative LysR family transcriptional regulator OS=Salmonella typhimurium (strain LT2 / SGSC1412 / ATCC 700720) GN=ybdO PE=4 SV=1							0.0164464			0.0164464
Q93GM5	Q93GM5_SALTY	Conjugative transfer: assembly OS=Salmonella typhimurium (strain LT2 / SGSC1412 / ATCC 700720) GN=traF PE=4 SV=1								0.0196981	0.0130477	0.0163729	0.00470251
Q8ZMX7	Q8ZMX7_SALTY	ATP-dependent RNA helicase SrmB OS=Salmonella typhimurium (strain LT2 / SGSC1412 / ATCC 700720) GN=srmB PE=3 SV=1							0.0142684		0.0183821	0.0163253	0.00290884
Q8ZL70	Q8ZL70_SALTY	Selenocysteinyl-tRNA-specific translation factor OS=Salmonella typhimurium (strain LT2 / SGSC1412 / ATCC 700720) GN=selB PE=4 SV=1							0.0162369			0.0162369
Q8ZQN8	Q8ZQN8_SALTY	ATP-dependent RNA helicase RhlE OS=Salmonella typhimurium (strain LT2 / SGSC1412 / ATCC 700720) GN=rhlE PE=3 SV=1							0.0161205			0.0161205
Q7CQ03	Q7CQ03_SALTY	CDP-diacylglycerol--serine O-phosphatidyltransferase OS=Salmonella typhimurium (strain LT2 / SGSC1412 / ATCC 700720) GN=pssA PE=3 SV=1							0.0159766	0.016068		0.0160223	6.46296e-05
Q8ZMV3	Q8ZMV3_SALTY	Fels-2 prophage protein OS=Salmonella typhimurium (strain LT2 / SGSC1412 / ATCC 700720) GN=STM2697 PE=4 SV=1									0.0158785	0.0158785
Q8ZKP4	Q8ZKP4_SALTY	Fructose-1,6-bisphosphatase OS=Salmonella typhimurium (strain LT2 / SGSC1412 / ATCC 700720) GN=glpX PE=3 SV=1							0.0157485			0.0157485
P51066	ACEA_SALTY	Isocitrate lyase OS=Salmonella typhimurium (strain LT2 / SGSC1412 / ATCC 700720) GN=aceA PE=3 SV=2							0.0165813	0.0143919		0.0154866	0.00154818
Q7CPB9	Q7CPB9_SALTY	Regulatory protein sensor for oxidative stress OS=Salmonella typhimurium (strain LT2 / SGSC1412 / ATCC 700720) GN=oxyR PE=4 SV=1							0.0153925			0.0153925
P74857	SSAN_SALTY	Probable secretion system apparatus ATP synthase SsaN OS=Salmonella typhimurium (strain LT2 / SGSC1412 / ATCC 700720) GN=ssaN PE=1 SV=1							0.0153714			0.0153714
Q9L6R4	WECC_SALTY	UDP-N-acetyl-D-mannosamine dehydrogenase OS=Salmonella typhimurium (strain LT2 / SGSC1412 / ATCC 700720) GN=wecC PE=3 SV=1							0.0153203			0.0153203
Q8ZP17	DADA_SALTY	D-amino acid dehydrogenase OS=Salmonella typhimurium (strain LT2 / SGSC1412 / ATCC 700720) GN=dadA PE=3 SV=1						0.0195496	0.0185407	0.0137244	0.00815241	0.0149918	0.0052202
P0A1P4	RFBJ_SALTY	CDP-abequose synthase OS=Salmonella typhimurium (strain LT2 / SGSC1412 / ATCC 700720) GN=rfbJ PE=3 SV=1							0.0149664			0.0149664
Q7CQZ2	Q7CQZ2_SALTY	Ribosomal silencing factor RsfS OS=Salmonella typhimurium (strain LT2 / SGSC1412 / ATCC 700720) GN=ybeB PE=3 SV=1									0.014942	0.014942
P20506	ILVA_SALTY	L-Threonine dehydratase biosynthetic IlvA OS=Salmonella typhimurium (strain LT2 / SGSC1412 / ATCC 700720) GN=ilvA PE=3 SV=3							0.0148736			0.0148736
Q8ZQG9	Q8ZQG9_SALTY	ATP-dependent Clp protease proteolytic subunit OS=Salmonella typhimurium (strain LT2 / SGSC1412 / ATCC 700720) GN=STM0912 PE=3 SV=1								0.0122128	0.0175316	0.0148722	0.00376091
Q8ZLJ7	Q8ZLJ7_SALTY	Transpeptidase of penicillin-binding protein 1a OS=Salmonella typhimurium (strain LT2 / SGSC1412 / ATCC 700720) GN=mrcA PE=4 SV=1							0.0147432			0.0147432
Q9L6T2	Q9L6T2_SALTY	Acetolactate synthase OS=Salmonella typhimurium (strain LT2 / SGSC1412 / ATCC 700720) GN=ilvG PE=3 SV=1									0.0146768	0.0146768
Q8ZQB7	MUKF_SALTY	Chromosome partition protein MukF OS=Salmonella typhimurium (strain LT2 / SGSC1412 / ATCC 700720) GN=mukF PE=3 SV=1							0.0145291			0.0145291
Q7CQG1	Q7CQG1_SALTY	Putative translation factor OS=Salmonella typhimurium (strain LT2 / SGSC1412 / ATCC 700720) GN=yciO PE=4 SV=1							0.0188476		0.00988182	0.0143647	0.00633976
Q8ZKD7	Q8ZKD7_SALTY	Putative anaerobic dimethyl sulfoxide reductase, subunit A OS=Salmonella typhimurium (strain LT2 / SGSC1412 / ATCC 700720) GN=STM4305 PE=4 SV=1							0.0142965			0.0142965
P16437	FLGB_SALTY	Flagellar basal body rod protein FlgB OS=Salmonella typhimurium (strain LT2 / SGSC1412 / ATCC 700720) GN=flgB PE=1 SV=2							0.0185362	0.00977945		0.0141578	0.00619193
P0A1Y0	MUTS_SALTY	DNA mismatch repair protein MutS OS=Salmonella typhimurium (strain LT2 / SGSC1412 / ATCC 700720) GN=mutS PE=1 SV=1							0.0119275	0.0162013		0.0140644	0.00302203
Q8ZLP7	Q8ZLP7_SALTY	Putative gntR family regulatory protein OS=Salmonella typhimurium (strain LT2 / SGSC1412 / ATCC 700720) GN=STM3358 PE=4 SV=1							0.0139846			0.0139846
Q56026	SIPD_SALTY	Cell invasion protein SipD OS=Salmonella typhimurium (strain LT2 / SGSC1412 / ATCC 700720) GN=sipD PE=1 SV=1									0.0138625	0.0138625
P37444	TRPR_SALTY	Trp operon repressor OS=Salmonella typhimurium (strain LT2 / SGSC1412 / ATCC 700720) GN=trpR PE=3 SV=2							0.0137846			0.0137846
Q9L6N4	Q9L6N4_SALTY	Putative hydrolase of the HAD superfamily OS=Salmonella typhimurium (strain LT2 / SGSC1412 / ATCC 700720) GN=yigL PE=4 SV=1							0.0135795			0.0135795
Q8ZPH0	Q8ZPH0_SALTY	Putative hydrogenase-1 large subunit OS=Salmonella typhimurium (strain LT2 / SGSC1412 / ATCC 700720) GN=STM1538 PE=1 SV=1							0.0134121			0.0134121
P64237	RSMG_SALTY	Ribosomal RNA small subunit methyltransferase G OS=Salmonella typhimurium (strain LT2 / SGSC1412 / ATCC 700720) GN=rsmG PE=3 SV=1							0.0133609			0.0133609
P58729	AROC_SALTY	Chorismate synthase OS=Salmonella typhimurium (strain LT2 / SGSC1412 / ATCC 700720) GN=aroC PE=3 SV=2							0.0132912			0.0132912
Q8ZQR8	Q8ZQR8_SALTY	Transcriptional repressor of modABCD operon (Molybdate uptake) OS=Salmonella typhimurium (strain LT2 / SGSC1412 / ATCC 700720) GN=modE PE=4 SV=1						0.0130301				0.0130301
Q8ZQS1	Q8ZQS1_SALTY	Aldose 1-epimerase OS=Salmonella typhimurium (strain LT2 / SGSC1412 / ATCC 700720) GN=galM PE=3 SV=1							0.013026			0.013026
Q7CPT2	Q7CPT2_SALTY	Putative D-mannonate oxidoreductase OS=Salmonella typhimurium (strain LT2 / SGSC1412 / ATCC 700720) GN=STM3136 PE=4 SV=1							0.0130214			0.0130214
Q8ZKX0	GLMU_SALTY	Bifunctional protein GlmU OS=Salmonella typhimurium (strain LT2 / SGSC1412 / ATCC 700720) GN=glmU PE=3 SV=1							0.0130119			0.0130119
P0A2B5	RIMM_SALTY	Ribosome maturation factor RimM OS=Salmonella typhimurium (strain LT2 / SGSC1412 / ATCC 700720) GN=rimM PE=3 SV=1								0.0128661		0.0128661
Q8ZR33	Q8ZR33_SALTY	Isochorismate synthetase, enterochelin biosynthesis OS=Salmonella typhimurium (strain LT2 / SGSC1412 / ATCC 700720) GN=entC PE=4 SV=1							0.0127512			0.0127512
Q8ZQ64	RLMI_SALTY	Ribosomal RNA large subunit methyltransferase I OS=Salmonella typhimurium (strain LT2 / SGSC1412 / ATCC 700720) GN=rlmI PE=3 SV=1							0.0125186			0.0125186
Q8ZKA0	Q8ZKA0_SALTY	Putative phage shock protein A OS=Salmonella typhimurium (strain LT2 / SGSC1412 / ATCC 700720) GN=yjfJ PE=4 SV=1							0.0125095			0.0125095
Q8ZNA2	Q8ZNA2_SALTY	Putative aminotransferase OS=Salmonella typhimurium (strain LT2 / SGSC1412 / ATCC 700720) GN=yfdZ PE=4 SV=1							0.013054	0.0118432		0.0124486	0.000856145
Q7CPL2	Q7CPL2_SALTY	Putative regulator OS=Salmonella typhimurium (strain LT2 / SGSC1412 / ATCC 700720) GN=yheO PE=4 SV=1									0.0124442	0.0124442
P0A2R6	DUSB_SALTY	tRNA-dihydrouridine synthase B OS=Salmonella typhimurium (strain LT2 / SGSC1412 / ATCC 700720) GN=dusB PE=3 SV=1							0.0124023			0.0124023
Q8ZNA1	Q8ZNA1_SALTY	Putative oxidoreductase OS=Salmonella typhimurium (strain LT2 / SGSC1412 / ATCC 700720) GN=STM2406 PE=1 SV=1							0.0123606			0.0123606
Q8ZJV2	Q8ZJV2_SALTY	Putative outer membrane protein OS=Salmonella typhimurium (strain LT2 / SGSC1412 / ATCC 700720) GN=STM4575 PE=4 SV=1								0.0121899		0.0121899
Q8ZKA5	Q8ZKA5_SALTY	GTPase HflX OS=Salmonella typhimurium (strain LT2 / SGSC1412 / ATCC 700720) GN=hflX PE=3 SV=1						0.0144032	0.00991241			0.0121578	0.00317547
Q9L9I4	DCUP_SALTY	Uroporphyrinogen decarboxylase OS=Salmonella typhimurium (strain LT2 / SGSC1412 / ATCC 700720) GN=hemE PE=3 SV=1									0.0118951	0.0118951
P40720	FUMA_SALTY	Fumarate hydratase class I, aerobic OS=Salmonella typhimurium (strain LT2 / SGSC1412 / ATCC 700720) GN=fumA PE=3 SV=3							0.00875369	0.00180356	0.0247843	0.0117805	0.0117856
P0A1X4	LPXD_SALTY	UDP-3-O-(3-hydroxymyristoyl)glucosamine N-acyltransferase OS=Salmonella typhimurium (strain LT2 / SGSC1412 / ATCC 700720) GN=lpxD PE=1 SV=2							0.011746			0.011746
P0CE12	SSPH2_SALTY	E3 ubiquitin-protein ligase sspH2 OS=Salmonella typhimurium (strain LT2 / SGSC1412 / ATCC 700720) GN=sspH2 PE=1 SV=1							0.0117274			0.0117274
P25924	CYSG_SALTY	Siroheme synthase OS=Salmonella typhimurium (strain LT2 / SGSC1412 / ATCC 700720) GN=cysG PE=1 SV=1							0.0116111			0.0116111
Q8ZRA5	Q8ZRA5_SALTY	Putative small-conductance mechanosensitive channel OS=Salmonella typhimurium (strain LT2 / SGSC1412 / ATCC 700720) GN=aefA PE=4 SV=1							0.0116065			0.0116065
H9L477	H9L477_SALTY	Salmonella plasmid virulence: hydrophilic protein OS=Salmonella typhimurium (strain LT2 / SGSC1412 / ATCC 700720) GN=spvB PE=4 SV=1							0.0115273			0.0115273
Q7CPK2	Q7CPK2_SALTY	Putative cytoplasmic protein OS=Salmonella typhimurium (strain LT2 / SGSC1412 / ATCC 700720) GN=yhhW PE=3 SV=1						0.0114699				0.0114699
Q8ZPN1	ANMK_SALTY	Anhydro-N-acetylmuramic acid kinase OS=Salmonella typhimurium (strain LT2 / SGSC1412 / ATCC 700720) GN=anmK PE=3 SV=1							0.011225			0.011225
P22713	GAL1_SALTY	Galactokinase OS=Salmonella typhimurium (strain LT2 / SGSC1412 / ATCC 700720) GN=galK PE=3 SV=2								0.0110625		0.0110625
Q9L6P4	Q9L6P4_SALTY	Putative hydrolase of the HAD superfamily OS=Salmonella typhimurium (strain LT2 / SGSC1412 / ATCC 700720) GN=yigB PE=4 SV=1						0.0109495				0.0109495
P0CL47	SIPC_SALTY	Cell invasion protein SipC OS=Salmonella typhimurium (strain LT2 / SGSC1412 / ATCC 700720) GN=sipC PE=1 SV=1									0.0108578	0.0108578
Q8ZLA7	Q8ZLA7_SALTY	Putative PQQ enzyme repeat protein OS=Salmonella typhimurium (strain LT2 / SGSC1412 / ATCC 700720) GN=STM3632 PE=4 SV=1								0.0107335		0.0107335
P41784	PRGI_SALTY	Protein PrgI OS=Salmonella typhimurium (strain LT2 / SGSC1412 / ATCC 700720) GN=prgI PE=1 SV=1						0.0107032				0.0107032
Q8ZMN2	Q8ZMN2_SALTY	Enterochelin esterase-like protein (Fes) OS=Salmonella typhimurium (strain LT2 / SGSC1412 / ATCC 700720) GN=iroD PE=4 SV=1							0.0106875			0.0106875
Q9S4Z1	Q9S4Z1_SALTY	Putative ABC-type transport system ATPase component/cell division protein OS=Salmonella typhimurium (strain LT2 / SGSC1412 / ATCC 700720) GN=sfbA PE=4 SV=1									0.0105894	0.0105894
P0A289	RF2_SALTY	Peptide chain release factor 2 OS=Salmonella typhimurium (strain LT2 / SGSC1412 / ATCC 700720) GN=prfB PE=3 SV=1							0.0105547			0.0105547
P0A2M1	NRDR_SALTY	Transcriptional repressor NrdR OS=Salmonella typhimurium (strain LT2 / SGSC1412 / ATCC 700720) GN=nrdR PE=3 SV=1							0.0104569			0.0104569
Q7CPP6	Q7CPP6_SALTY	Octaprenyl diphosphate synthase OS=Salmonella typhimurium (strain LT2 / SGSC1412 / ATCC 700720) GN=ispB PE=3 SV=1									0.0104309	0.0104309
Q8ZM23	UXAC_SALTY	Uronate isomerase OS=Salmonella typhimurium (strain LT2 / SGSC1412 / ATCC 700720) GN=uxaC PE=1 SV=1									0.0103578	0.0103578
Q8ZMN1	Q8ZMN1_SALTY	Putative hydrolase of the alpha/beta superfamily OS=Salmonella typhimurium (strain LT2 / SGSC1412 / ATCC 700720) GN=iroE PE=4 SV=1							0.0101034			0.0101034
P0A2M7	UXUA_SALTY	Mannonate dehydratase OS=Salmonella typhimurium (strain LT2 / SGSC1412 / ATCC 700720) GN=uxuA PE=3 SV=1							0.0100869			0.0100869
Q8ZNS1	Q8ZNS1_SALTY	Putative periplasmic protein OS=Salmonella typhimurium (strain LT2 / SGSC1412 / ATCC 700720) GN=STM2008 PE=4 SV=1									0.00982686	0.00982686
Q8ZL01	Q8ZL01_SALTY	Putative cytoplasmic protein OS=Salmonella typhimurium (strain LT2 / SGSC1412 / ATCC 700720) GN=yidR PE=4 SV=1									0.00971107	0.00971107
Q8ZMN7	Q8ZMN7_SALTY	Putative superfamily I DNA and RNA helicase OS=Salmonella typhimurium (strain LT2 / SGSC1412 / ATCC 700720) GN=STM2767 PE=4 SV=1							0.00961004			0.00961004
Q7CQJ2	Q7CQJ2_SALTY	Putative gntR family regulatory protein OS=Salmonella typhimurium (strain LT2 / SGSC1412 / ATCC 700720) GN=STM1541 PE=4 SV=1							0.00959148			0.00959148
Q8ZLF0	Q8ZLF0_SALTY	Cell division protein FtsX OS=Salmonella typhimurium (strain LT2 / SGSC1412 / ATCC 700720) GN=ftsX PE=3 SV=1							0.00940544			0.00940544
Q7CQD4	SOPE2_SALTY	Guanine nucleotide exchange factor sopE2 OS=Salmonella typhimurium (strain LT2 / SGSC1412 / ATCC 700720) GN=sopE2 PE=1 SV=3						0.00903352				0.00903352
Q7CR48	Q7CR48_SALTY	Delta-aminolevulinic acid dehydratase OS=Salmonella typhimurium (strain LT2 / SGSC1412 / ATCC 700720) GN=hemB PE=3 SV=1							0.00893519			0.00893519
Q7CQC4	CMOA_SALTY	tRNA (cmo5U34)-methyltransferase OS=Salmonella typhimurium (strain LT2 / SGSC1412 / ATCC 700720) GN=cmoA PE=1 SV=1							0.00886094			0.00886094
P00898	TRPE_SALTY	Anthranilate synthase component 1 OS=Salmonella typhimurium (strain LT2 / SGSC1412 / ATCC 700720) GN=trpE PE=1 SV=3							0.0088003			0.0088003
Q8ZRP1	RSEP_SALTY	Regulator of sigma E protease OS=Salmonella typhimurium (strain LT2 / SGSC1412 / ATCC 700720) GN=rseP PE=3 SV=1							0.00849299			0.00849299
Q8ZRU1	DDLB_SALTY	D-alanine--D-alanine ligase B OS=Salmonella typhimurium (strain LT2 / SGSC1412 / ATCC 700720) GN=ddlB PE=3 SV=3							0.00722496		0.00975376	0.00848936	0.00178813
Q8ZLD3	Q8ZLD3_SALTY	Putative L-asparaginase OS=Salmonella typhimurium (strain LT2 / SGSC1412 / ATCC 700720) GN=STM3598 PE=3 SV=1									0.00831729	0.00831729
P65599	ORN_SALTY	Oligoribonuclease OS=Salmonella typhimurium (strain LT2 / SGSC1412 / ATCC 700720) GN=orn PE=3 SV=2							0.00725301			0.00725301
Q7CQT7	YCAR_SALTY	UPF0434 protein YcaR OS=Salmonella typhimurium (strain LT2 / SGSC1412 / ATCC 700720) GN=ycaR PE=3 SV=1							0.00716927			0.00716927
Q8ZKZ1	DGOD_SALTY	D-galactonate dehydratase OS=Salmonella typhimurium (strain LT2 / SGSC1412 / ATCC 700720) GN=dgoD PE=3 SV=1							0.00712018			0.00712018
Q8ZK09	Q8ZK09_SALTY	Putative inner membrane protein OS=Salmonella typhimurium (strain LT2 / SGSC1412 / ATCC 700720) GN=STM4498 PE=4 SV=1							0.00695271			0.00695271
P67693	ZAPD_SALTY	Cell division protein ZapD OS=Salmonella typhimurium (strain LT2 / SGSC1412 / ATCC 700720) GN=zapD PE=3 SV=1							0.00693868			0.00693868
Q7CR38	Q7CR38_SALTY	Uncharacterized protein OS=Salmonella typhimurium (strain LT2 / SGSC1412 / ATCC 700720) GN=STM0409 PE=4 SV=1						0.00682522				0.00682522
Q9L6N5	Q9L6N5_SALTY	82% identity to E. coli lysophospholipase (PLDB) (SP:P07000); contains similarity to Pfam family PF00561 (Alpha/beta hydrolase fold), score=116.6, E=4.6e-31, N=1 OS=Salmonella typhimurium (strain LT2 / SGSC1412 / ATCC 700720) GN=pldB PE=4 SV=1							0.00655712			0.00655712
P26366	AMIB_SALTY	N-acetylmuramoyl-L-alanine amidase AmiB OS=Salmonella typhimurium (strain LT2 / SGSC1412 / ATCC 700720) GN=amiB PE=3 SV=2									0.00625865	0.00625865
Q8ZR17	Q8ZR17_SALTY	Putative dehydrogenase OS=Salmonella typhimurium (strain LT2 / SGSC1412 / ATCC 700720) GN=ybdR PE=3 SV=1							0.00620814			0.00620814
Q7CR41	ACPH_SALTY	Acyl carrier protein phosphodiesterase OS=Salmonella typhimurium (strain LT2 / SGSC1412 / ATCC 700720) GN=acpH PE=3 SV=1								0.0061904		0.0061904
P0A9Z4	GLNB_SALTY	Nitrogen regulatory protein P-II 1 OS=Salmonella typhimurium (strain LT2 / SGSC1412 / ATCC 700720) GN=glnB PE=3 SV=1							0.00614297			0.00614297
Q7CR74	Q7CR74_SALTY	Putative periplasmic protein OS=Salmonella typhimurium (strain LT2 / SGSC1412 / ATCC 700720) GN=STM0156 PE=4 SV=1							0.00604521			0.00604521
P65386	MOAA_SALTY	Cyclic pyranopterin monophosphate synthase OS=Salmonella typhimurium (strain LT2 / SGSC1412 / ATCC 700720) GN=moaA PE=3 SV=1							0.00584968			0.00584968
P0A231	PA1_SALTY	Phospholipase A1 OS=Salmonella typhimurium (strain LT2 / SGSC1412 / ATCC 700720) GN=pldA PE=3 SV=1							0.00563353			0.00563353
Q8ZS04	Q8ZS04_SALTY	Fimbrial chaparone OS=Salmonella typhimurium (strain LT2 / SGSC1412 / ATCC 700720) GN=bcfG PE=3 SV=1								0.00535795		0.00535795
Q8ZMD8	Q8ZMD8_SALTY	Putative d-glucarate dehydratase OS=Salmonella typhimurium (strain LT2 / SGSC1412 / ATCC 700720) GN=ygcY PE=4 SV=1								0.00528862		0.00528862
Q8ZKF5	NRFA_SALTY	Cytochrome c-552 OS=Salmonella typhimurium (strain LT2 / SGSC1412 / ATCC 700720) GN=nrfA PE=3 SV=1							0.00471901			0.00471901
P0A1Z0	LDCI_SALTY	Lysine decarboxylase, inducible OS=Salmonella typhimurium (strain LT2 / SGSC1412 / ATCC 700720) GN=cadA PE=3 SV=1									0.00471546	0.00471546
Q8ZQX2	Q8ZQX2_SALTY	Putative LysR family transcriptional regulator OS=Salmonella typhimurium (strain LT2 / SGSC1412 / ATCC 700720) GN=STM0692 PE=4 SV=1							0.0044117			0.0044117
Q06994	RFAB_SALTY	Lipopolysaccharide 1,6-galactosyltransferase OS=Salmonella typhimurium (strain LT2 / SGSC1412 / ATCC 700720) GN=rfaB PE=3 SV=2							0.00378346			0.00378346
Q8ZM47	Q8ZM47_SALTY	Putative enzyme with a TIM-barrel fold OS=Salmonella typhimurium (strain LT2 / SGSC1412 / ATCC 700720) GN=yggS PE=3 SV=1							0.00343449			0.00343449
Q9L6Q3	HEM4_SALTY	Uroporphyrinogen-III synthase OS=Salmonella typhimurium (strain LT2 / SGSC1412 / ATCC 700720) GN=hemD PE=3 SV=1								0.00319065		0.00319065
Q8ZQ02	Q8ZQ02_SALTY	Putative periplasmic protein OS=Salmonella typhimurium (strain LT2 / SGSC1412 / ATCC 700720) GN=ycfS PE=4 SV=1							0.00305746			0.00305746
Q93GS3	Q93GS3_SALTY	SdiA-regulated gene putative outer membrane protein OS=Salmonella typhimurium (strain LT2 / SGSC1412 / ATCC 700720) GN=srgB PE=4 SV=1						0.00279212				0.00279212
Q8ZL00	Q8ZL00_SALTY	Putative heme lyase subunit OS=Salmonella typhimurium (strain LT2 / SGSC1412 / ATCC 700720) GN=ccmH PE=4 SV=1
Q7CPP9	GLMM_SALTY	Phosphoglucosamine mutase OS=Salmonella typhimurium (strain LT2 / SGSC1412 / ATCC 700720) GN=glmM PE=3 SV=1
Q7CPZ3	BAME_SALTY	Outer membrane protein assembly factor BamE OS=Salmonella typhimurium (strain LT2 / SGSC1412 / ATCC 700720) GN=bamE PE=3 SV=1
Q7CQB5	Q7CQB5_SALTY	Putative ABC-type amino acid transporter OS=Salmonella typhimurium (strain LT2 / SGSC1412 / ATCC 700720) GN=yecS PE=3 SV=1
Q7CQD8	Q7CQD8_SALTY	Mannose-specific enzyme IIC OS=Salmonella typhimurium (strain LT2 / SGSC1412 / ATCC 700720) GN=manY PE=4 SV=1
Q7CQY5	Q7CQY5_SALTY	Putative phosphatase in N-acetylglucosamine metabolism OS=Salmonella typhimurium (strain LT2 / SGSC1412 / ATCC 700720) GN=nagD PE=4 SV=1
Q7CQY8	Q7CQY8_SALTY	Glutamate/aspartate transporter OS=Salmonella typhimurium (strain LT2 / SGSC1412 / ATCC 700720) GN=gltJ PE=3 SV=1
Q7DAP8	Q7DAP8_SALTY	Putative diguanylate cyclase/phosphodiesterase OS=Salmonella typhimurium (strain LT2 / SGSC1412 / ATCC 700720) GN=PSLT032 PE=4 SV=1
Q8ZJZ8	Q8ZJZ8_SALTY	Isoaspartyl dipeptidase OS=Salmonella typhimurium (strain LT2 / SGSC1412 / ATCC 700720) GN=iadA PE=3 SV=1
Q8ZK22	Q8ZK22_SALTY	L-idonate 5-dehydrogenase OS=Salmonella typhimurium (strain LT2 / SGSC1412 / ATCC 700720) GN=idnD PE=4 SV=1
Q8ZLX3	Q8ZLX3_SALTY	Putative dehydrogenase OS=Salmonella typhimurium (strain LT2 / SGSC1412 / ATCC 700720) GN=ygjR PE=4 SV=1
Q8ZMR1	Q8ZMR1_SALTY	Putative cytoplasmic protein OS=Salmonella typhimurium (strain LT2 / SGSC1412 / ATCC 700720) GN=STM2743 PE=4 SV=1
Q8ZNA0	Q8ZNA0_SALTY	Nucleoside permease OS=Salmonella typhimurium (strain LT2 / SGSC1412 / ATCC 700720) GN=nupC PE=3 SV=1
Q8ZNB9	TRUA_SALTY	tRNA pseudouridine synthase A OS=Salmonella typhimurium (strain LT2 / SGSC1412 / ATCC 700720) GN=truA PE=3 SV=1
Q8ZNC8	Q8ZNC8_SALTY	Putative sugar nucleotide epimerase OS=Salmonella typhimurium (strain LT2 / SGSC1412 / ATCC 700720) GN=yfcH PE=4 SV=1
Q8ZP82	Q8ZP82_SALTY	Putative transcriptional regulator OS=Salmonella typhimurium (strain LT2 / SGSC1412 / ATCC 700720) GN=STM1664 PE=4 SV=1
Q8ZPL5	Q8ZPL5_SALTY	Putative periplasmic protein OS=Salmonella typhimurium (strain LT2 / SGSC1412 / ATCC 700720) GN=STM1472 PE=4 SV=1
Q8ZPS4	AROH_SALTY	Phospho-2-dehydro-3-deoxyheptonate aldolase, Trp-sensitive OS=Salmonella typhimurium (strain LT2 / SGSC1412 / ATCC 700720) GN=aroH PE=3 SV=1
Q8ZPZ5	HFLD_SALTY	High frequency lysogenization protein HflD homolog OS=Salmonella typhimurium (strain LT2 / SGSC1412 / ATCC 700720) GN=hflD PE=3 SV=2
Q8ZQD0	Q8ZQD0_SALTY	Pyruvate formate-lyase-activating enzyme OS=Salmonella typhimurium (strain LT2 / SGSC1412 / ATCC 700720) GN=pflA PE=3 SV=1
Q8ZQD7	Q8ZQD7_SALTY	Cytochrome-related transporter OS=Salmonella typhimurium (strain LT2 / SGSC1412 / ATCC 700720) GN=cydC PE=3 SV=1
Q8ZQK7	Q8ZQK7_SALTY	Putative hydrolase OS=Salmonella typhimurium (strain LT2 / SGSC1412 / ATCC 700720) GN=STM0867 PE=4 SV=1
Q8ZRH6	Q8ZRH6_SALTY	Putative diguanylate cyclase/phosphodiesterase domain 1 OS=Salmonella typhimurium (strain LT2 / SGSC1412 / ATCC 700720) GN=STM0343 PE=4 SV=1
Q93GR5	Q93GR5_SALTY	Toxin addiction system: toxin OS=Salmonella typhimurium (strain LT2 / SGSC1412 / ATCC 700720) GN=ccdB PE=4 SV=1
Q93IT2	Q93IT2_SALTY	Putative cytoplasmic protein OS=Salmonella typhimurium (strain LT2 / SGSC1412 / ATCC 700720) GN=STM0269 PE=4 SV=1
Q9L9J3	Q9L9J3_SALTY	Putative cytoplasmic protein OS=Salmonella typhimurium (strain LT2 / SGSC1412 / ATCC 700720) GN=STMF1.17 PE=4 SV=1
H9L480	H9L480_SALTY	Secretion system apparatus OS=Salmonella typhimurium (strain LT2 / SGSC1412 / ATCC 700720) GN=ssaH PE=4 SV=1
O68446	PURR_SALTY	HTH-type transcriptional repressor PurR OS=Salmonella typhimurium (strain LT2 / SGSC1412 / ATCC 700720) GN=purR PE=3 SV=3
P00905	TRPGD_SALTY	Bifunctional protein TrpGD OS=Salmonella typhimurium (strain LT2 / SGSC1412 / ATCC 700720) GN=trpGD PE=1 SV=4
P0A1Z4	PYRB_SALTY	Aspartate carbamoyltransferase catalytic chain OS=Salmonella typhimurium (strain LT2 / SGSC1412 / ATCC 700720) GN=pyrB PE=3 SV=2
P36640	ATMA_SALTY	Magnesium-transporting ATPase, P-type 1 OS=Salmonella typhimurium (strain LT2 / SGSC1412 / ATCC 700720) GN=mgtA PE=2 SV=1
P39434	SLT_SALTY	Soluble lytic murein transglycosylase OS=Salmonella typhimurium (strain LT2 / SGSC1412 / ATCC 700720) GN=slt PE=3 SV=2
P63603	AROL_SALTY	Shikimate kinase 2 OS=Salmonella typhimurium (strain LT2 / SGSC1412 / ATCC 700720) GN=aroL PE=3 SV=1
Q7CPB8	FABR_SALTY	HTH-type transcriptional repressor FabR OS=Salmonella typhimurium (strain LT2 / SGSC1412 / ATCC 700720) GN=fabR PE=3 SV=2

## Sheet: ssaV
Accession	Entry	Description	mW (Da)	pI (pH)	PLGS Score	Peptides	Coverage (%)	Precursor RMS Mass Error (ppm)	Products	Products RMS Mass Error (ppm)	ΔssaV replicate 1 normalized abundance
P02936	OMPA_SALTY	Outer membrane protein A OS=Salmonella typhimurium (strain LT2 / SGSC1412 / ATCC 700720) GN=ompA PE=3 SV=2	37491	5.499	21056.5	55	57.7143	1.6439	349	6.1352	3.0551
P0A1H5	EFTU_SALTY	Elongation factor Tu OS=Salmonella typhimurium (strain LT2 / SGSC1412 / ATCC 700720) GN=tufA PE=3 SV=2	43256	5.1475	15953.6	67	60.1523	2.9053	415	7.2336	2.89624
P0A1D5	CH10_SALTY	10 kDa chaperonin OS=Salmonella typhimurium (strain LT2 / SGSC1412 / ATCC 700720) GN=groS PE=3 SV=1	10311	5.1929	21127.2	14	58.7629	1.1002	118	4.7029	1.98247
P26976	PHON_SALTY	Non-specific acid phosphatase OS=Salmonella typhimurium (strain LT2 / SGSC1412 / ATCC 700720) GN=phoN PE=3 SV=1	28364	9.2183	12468.1	44	50	2.4198	267	6.3951	1.90886
P0A1D3	CH60_SALTY	60 kDa chaperonin OS=Salmonella typhimurium (strain LT2 / SGSC1412 / ATCC 700720) GN=groL PE=3 SV=2	57249	4.6494	29416.1	100	70.8029	2.0239	801	6.646	1.82057
P0A1R6	DBHA_SALTY	DNA-binding protein HU-alpha OS=Salmonella typhimurium (strain LT2 / SGSC1412 / ATCC 700720) GN=hupA PE=3 SV=1	9515	10.1235	24043.8	21	63.3333	1.6704	152	6.146	1.73165
P23988	PAGC_SALTY	Virulence membrane protein PagC OS=Salmonella typhimurium (strain LT2 / SGSC1412 / ATCC 700720) GN=pagC PE=3 SV=2	20171	7.6406	15849.3	21	61.0811	3.0124	171	7.2722	1.57848
P64076	ENO_SALTY	Enolase OS=Salmonella typhimurium (strain LT2 / SGSC1412 / ATCC 700720) GN=eno PE=3 SV=2	45570	5.0845	23533.7	41	46.9907	1.653	346	5.7325	1.51734
P0A1P0	G3P1_SALTY	Glyceraldehyde-3-phosphate dehydrogenase OS=Salmonella typhimurium (strain LT2 / SGSC1412 / ATCC 700720) GN=gapA PE=3 SV=2	35564	6.3589	8433.36	42	42.9003	2.376	264	6.732	1.47983
Q8ZRJ9	PAGN_SALTY	Outer membrane protein PagN OS=Salmonella typhimurium (strain LT2 / SGSC1412 / ATCC 700720) GN=pagN PE=1 SV=1	25691	5.8037	11080.6	23	57.3222	2.0263	156	7.3282	1.29171
Q7CQN4	LPP1_SALTY	Major outer membrane lipoprotein 1 OS=Salmonella typhimurium (strain LT2 / SGSC1412 / ATCC 700720) GN=lpp1 PE=3 SV=1	8386	9.8232	23026.5	10	33.3333	1.5373	111	6.0333	1.20648
Q8ZKX5	Q8ZKX5_SALTY	Phosphate-binding protein PstS OS=Salmonella typhimurium (strain LT2 / SGSC1412 / ATCC 700720) GN=pstS PE=3 SV=1	36793	9.2783	13136.3	37	60.6936	4.0651	321	6.0784	1.18849
P0DM78	PHOP_SALTY	Virulence transcriptional regulatory protein PhoP OS=Salmonella typhimurium (strain LT2 / SGSC1412 / ATCC 700720) GN=phoP PE=1 SV=1	25617	5.1401	15015.4	40	81.6964	3.1698	282	7.4342	1.11209
P0A283	PTGA_SALTY	Glucose-specific phosphotransferase enzyme IIA component OS=Salmonella typhimurium (strain LT2 / SGSC1412 / ATCC 700720) GN=crr PE=3 SV=2	18235	4.5366	44375.5	14	86.3905	4.6232	214	5.761	1.09038
P0CW86	SODC1_SALTY	Superoxide dismutase [Cu-Zn] 1 OS=Salmonella typhimurium (strain LT2 / SGSC1412 / ATCC 700720) GN=sodC1 PE=1 SV=1	18358	6.5464	14954.5	24	43.5028	1.5879	152	7.086	1.01801
P0A263	OMPC_SALTY	Outer membrane protein C OS=Salmonella typhimurium (strain LT2 / SGSC1412 / ATCC 700720) GN=ompC PE=3 SV=1	41213	4.4399	7098.7	53	72.7513	1.3922	353	7.3931	1.01207
Q7CQV8	Q7CQV8_SALTY	Outer membrane protease, receptor for phage OX2 OS=Salmonella typhimurium (strain LT2 / SGSC1412 / ATCC 700720) GN=ompX PE=4 SV=1	18482	5.6646	18210.3	20	49.1228	1.446	149	6.3085	0.996954
Q7CR42	Q7CR42_SALTY	Putative thiol-alkyl hydroperoxide reductase OS=Salmonella typhimurium (strain LT2 / SGSC1412 / ATCC 700720) GN=STM0402 PE=4 SV=1	22303	5.0933	7107.93	33	62.5	3.3527	189	7.1868	0.842769
P00489	PYGM_RABIT	Glycogen phosphorylase, muscle form OS=Oryctolagus cuniculus GN=PYGM PE=1 SV=3	97227	6.7954	2009.77	26	32.8588	7.7206	191	8.5612	0.835331
Q8ZQS2	GPMA_SALTY	2,3-bisphosphoglycerate-dependent phosphoglycerate mutase OS=Salmonella typhimurium (strain LT2 / SGSC1412 / ATCC 700720) GN=gpmA PE=3 SV=3	28475	5.707	8886.71	25	42.8	2.9163	146	8.2083	0.830471
Q8ZKB1	PSD_SALTY	Phosphatidylserine decarboxylase proenzyme OS=Salmonella typhimurium (strain LT2 / SGSC1412 / ATCC 700720) GN=psd PE=3 SV=1	35865	6.3604	321.957	9	35.7143	1.7441	40	10.8596	0.746356
Q7CPK0	UGPB_SALTY	sn-glycerol-3-phosphate-binding periplasmic protein UgpB OS=Salmonella typhimurium (strain LT2 / SGSC1412 / ATCC 700720) GN=ugpB PE=3 SV=1	48362	7.3286	12242.6	39	58.9041	2.2273	332	6.2762	0.742298
P25077	MDH_SALTY	Malate dehydrogenase OS=Salmonella typhimurium (strain LT2 / SGSC1412 / ATCC 700720) GN=mdh PE=3 SV=2	32455	5.9678	6682.92	32	71.4744	2.0234	219	7.0539	0.741936
Q7CPX8	Q7CPX8_SALTY	Fur regulated Salmonella iron transporter OS=Salmonella typhimurium (strain LT2 / SGSC1412 / ATCC 700720) GN=sitA PE=3 SV=1	33701	8.6953	5206.26	14	48.5246	3.6183	145	9.2975	0.727775
P0A1S2	HNS_SALTY	DNA-binding protein H-NS OS=Salmonella typhimurium (strain LT2 / SGSC1412 / ATCC 700720) GN=hns PE=1 SV=2	15532	5.0903	24882.3	27	62.7737	3.0495	183	7.4248	0.719004
P0A9Y9	CSPC_SALTY	Cold shock-like protein CspC OS=Salmonella typhimurium (strain LT2 / SGSC1412 / ATCC 700720) GN=cspC PE=3 SV=2	7397	7.7036	10787.1	18	92.7536	2.6496	85	6.8752	0.689113
Q8ZM35	Q8ZM35_SALTY	Putative monoamine oxidase OS=Salmonella typhimurium (strain LT2 / SGSC1412 / ATCC 700720) GN=STM3119 PE=4 SV=1	19528	6.0776	6764.02	14	30.8571	0.9788	115	6.811	0.652432
Q8ZPA3	Q8ZPA3_SALTY	Putative periplasmic binding protein OS=Salmonella typhimurium (strain LT2 / SGSC1412 / ATCC 700720) GN=STM1633 PE=1 SV=1	28420	9.1846	9827.61	24	38.7352	2.0923	154	7.1927	0.640241
P66541	RS2_SALTY	30S ribosomal protein S2 OS=Salmonella typhimurium (strain LT2 / SGSC1412 / ATCC 700720) GN=rpsB PE=3 SV=2	26741	6.7266	4803.38	16	58.5062	3.4497	147	9.5821	0.63147
Q56073	DNAK_SALTY	Chaperone protein DnaK OS=Salmonella typhimurium (strain LT2 / SGSC1412 / ATCC 700720) GN=dnaK PE=3 SV=2	69215	4.6406	8174.14	60	72.5705	2.8465	463	7.6078	0.63095
P0A7V6	RS3_SALTY	30S ribosomal protein S3 OS=Salmonella typhimurium (strain LT2 / SGSC1412 / ATCC 700720) GN=rpsC PE=3 SV=2	25967	10.7168	10517.9	22	46.3519	2.039	162	6.0345	0.591122
Q7CPE2	ATPB_SALTY	ATP synthase subunit beta OS=Salmonella typhimurium (strain LT2 / SGSC1412 / ATCC 700720) GN=atpD PE=3 SV=1	50251	4.7065	13253.2	47	63.6957	3.1843	370	7.7028	0.584292
H9L442	H9L442_SALTY	D-alanyl-D-alanine dipeptidase OS=Salmonella typhimurium (strain LT2 / SGSC1412 / ATCC 700720) GN=pdgL PE=3 SV=1	28977	6.7383	5919.3	20	41.4063	3.1565	126	6.2961	0.582645
Q93DX1	Q93DX1_SALTY	Putative acetyl-CoA hydrolase OS=Salmonella typhimurium (strain LT2 / SGSC1412 / ATCC 700720) GN=STM3118 PE=4 SV=1	48391	6.0059	2702.31	34	39.6825	3.4445	202	8.4575	0.576148
Q8ZP65	TPX_SALTY	Probable thiol peroxidase OS=Salmonella typhimurium (strain LT2 / SGSC1412 / ATCC 700720) GN=tpx PE=3 SV=1	18014	4.7446	11671.1	12	40.4762	1.43	103	5.3712	0.561095
P0A1H3	EFG_SALTY	Elongation factor G OS=Salmonella typhimurium (strain LT2 / SGSC1412 / ATCC 700720) GN=fusA PE=3 SV=2	77550	5.001	8205.05	56	54.8295	4.444	389	7.4107	0.546268
Q8ZLL6	Q8ZLL6_SALTY	Peptidyl-prolyl cis-trans isomerase OS=Salmonella typhimurium (strain LT2 / SGSC1412 / ATCC 700720) GN=fkpA PE=4 SV=1	28927	9.0366	6014.27	32	48.5294	4.6313	164	8.1601	0.531528
P0A2A3	RL1_SALTY	50S ribosomal protein L1 OS=Salmonella typhimurium (strain LT2 / SGSC1412 / ATCC 700720) GN=rplA PE=3 SV=1	24713	10.1016	11527.5	22	52.5641	2.5204	163	6.8331	0.52409
Q8ZLD5	Q8ZLD5_SALTY	Putative phosphatase OS=Salmonella typhimurium (strain LT2 / SGSC1412 / ATCC 700720) GN=STM3595 PE=4 SV=1	46440	5.9429	9999.02	47	48.6998	2.127	275	6.833	0.522062
P0A7W4	RS5_SALTY	30S ribosomal protein S5 OS=Salmonella typhimurium (strain LT2 / SGSC1412 / ATCC 700720) GN=rpsE PE=1 SV=2	17592	10.5601	8163.5	22	62.2755	3.0356	153	6.8738	0.514211
Q8ZM36	VIR17_SALTY	Virulence protein STM3117 OS=Salmonella typhimurium (strain LT2 / SGSC1412 / ATCC 700720) GN=STM3117 PE=1 SV=1	16136	4.957	7352.14	18	44.4444	1.1558	124	7.0929	0.488182
P0A297	RL10_SALTY	50S ribosomal protein L10 OS=Salmonella typhimurium (strain LT2 / SGSC1412 / ATCC 700720) GN=rplJ PE=3 SV=2	17789	9.4629	12194.8	15	53.9394	4.2333	109	7.1522	0.465259
P66038	RISB_SALTY	6,7-dimethyl-8-ribityllumazine synthase OS=Salmonella typhimurium (strain LT2 / SGSC1412 / ATCC 700720) GN=ribH PE=1 SV=1	15998	4.9146	24073.2	12	50	1.851	120	4.7457	0.455656
Q7CPE1	ATPA_SALTY	ATP synthase subunit alpha OS=Salmonella typhimurium (strain LT2 / SGSC1412 / ATCC 700720) GN=atpA PE=3 SV=1	55078	5.6089	9702.08	63	55.5556	2.6575	324	8.0088	0.454655
P66073	RL15_SALTY	50S ribosomal protein L15 OS=Salmonella typhimurium (strain LT2 / SGSC1412 / ATCC 700720) GN=rplO PE=3 SV=1	14957	11.6133	7917.93	8	45.1389	6.3536	83	6.4254	0.447109
Q93GL9	Q93GL9_SALTY	Conjugative transfer: surface exclusion OS=Salmonella typhimurium (strain LT2 / SGSC1412 / ATCC 700720) GN=traT PE=4 SV=1	26152	9.3472	3832.73	23	38.2716	2.8487	156	7.9337	0.442769
Q7CPU6	Q7CPU6_SALTY	Fructose-bisphosphate aldolase OS=Salmonella typhimurium (strain LT2 / SGSC1412 / ATCC 700720) GN=fba PE=4 SV=1	39131	5.6323	4746.35	12	25.3482	1.8133	102	6.9598	0.4427
P37592	OMPD_SALTY	Outer membrane porin protein OmpD OS=Salmonella typhimurium (strain LT2 / SGSC1412 / ATCC 700720) GN=ompD PE=1 SV=2	39655	4.4648	2890.94	25	54.6961	4.117	145	9.2725	0.436693
Q8ZPZ0	Q8ZPZ0_SALTY	Isocitrate dehydrogenase [NADP] OS=Salmonella typhimurium (strain LT2 / SGSC1412 / ATCC 700720) GN=icdA PE=3 SV=1	45758	4.9629	6236.13	29	47.5962	3.5904	176	8.166	0.435055
Q7CR46	IRAP_SALTY	Anti-adapter protein IraP OS=Salmonella typhimurium (strain LT2 / SGSC1412 / ATCC 700720) GN=iraP PE=2 SV=2	9876	5.4961	10450.7	6	52.3256	0.9039	78	6.3987	0.428715
Q8ZNV8	Q8ZNV8_SALTY	ABC superfamily high affinity Zn transport protein OS=Salmonella typhimurium (strain LT2 / SGSC1412 / ATCC 700720) GN=znuA PE=1 SV=1	36486	5.5239	4282.12	19	25.8258	2.5057	147	7.5308	0.40058
P43019	SODM_SALTY	Superoxide dismutase [Mn] OS=Salmonella typhimurium (strain LT2 / SGSC1412 / ATCC 700720) GN=sodA PE=3 SV=3	23064	6.5054	5615.07	12	28.1553	1.6315	79	6.9367	0.400491
Q7CR88	Q7CR88_SALTY	Putative secreted protein OS=Salmonella typhimurium (strain LT2 / SGSC1412 / ATCC 700720) GN=STM0082 PE=1 SV=1	10296	9.5186	8027.48	12	85.4167	4.2414	86	9.032	0.392671
Q93DX3	Q93DX3_SALTY	Putative LysR family transcriptional regulator OS=Salmonella typhimurium (strain LT2 / SGSC1412 / ATCC 700720) GN=STM3120 PE=4 SV=1	29892	5.8477	6583.95	12	43.5714	4.5833	112	9.5146	0.389436
P65702	PGK_SALTY	Phosphoglycerate kinase OS=Salmonella typhimurium (strain LT2 / SGSC1412 / ATCC 700720) GN=pgk PE=3 SV=2	41106	4.8999	7551.19	31	56.3307	2.9322	202	6.8061	0.38192
Q8ZLM1	RS13_SALTY	30S ribosomal protein S13 OS=Salmonella typhimurium (strain LT2 / SGSC1412 / ATCC 700720) GN=rpsM PE=3 SV=3	13153	11.2163	7484.93	17	60.1695	2.686	91	8.2558	0.380969
Q8ZRT0	Q8ZRT0_SALTY	Dihydrolipoyl dehydrogenase OS=Salmonella typhimurium (strain LT2 / SGSC1412 / ATCC 700720) GN=lpdA PE=4 SV=1	50607	5.8315	6703.44	12	29.3249	3.8308	152	6.5844	0.379469
Q8ZP03	Q8ZP03_SALTY	Mannose-specific enzyme IIAB OS=Salmonella typhimurium (strain LT2 / SGSC1412 / ATCC 700720) GN=manX PE=4 SV=1	34965	5.7246	6005.06	22	51.2422	1.8245	189	6.5446	0.377481
Q8ZR70	Q8ZR70_SALTY	N5-carboxyaminoimidazole ribonucleotide mutase OS=Salmonella typhimurium (strain LT2 / SGSC1412 / ATCC 700720) GN=purE PE=3 SV=1	17783	5.5562	2449.22	3	30.1775	2.9545	25	8.5641	0.370899
P0A6B1	ACP_SALTY	Acyl carrier protein OS=Salmonella typhimurium (strain LT2 / SGSC1412 / ATCC 700720) GN=acpP PE=3 SV=2	8634	3.7559	3416.03	5	33.3333	0.9459	43	6.5119	0.367048
P60726	RL4_SALTY	50S ribosomal protein L4 OS=Salmonella typhimurium (strain LT2 / SGSC1412 / ATCC 700720) GN=rplD PE=1 SV=1	22072	10.1924	10693	21	54.7264	1.4788	138	6.86	0.358439
P64052	EFTS_SALTY	Elongation factor Ts OS=Salmonella typhimurium (strain LT2 / SGSC1412 / ATCC 700720) GN=tsf PE=3 SV=1	30338	4.9468	6488.23	38	69.9647	2.3804	212	7.9127	0.355263
P74860	SSAQ_SALTY	Secretion system apparatus protein SsaQ OS=Salmonella typhimurium (strain LT2 / SGSC1412 / ATCC 700720) GN=ssaQ PE=3 SV=2	35986	4.5894	119.245	4	20.8075	11.5622	21	10.6364	0.350892
Q7CQZ5	Q7CQZ5_SALTY	RNA chaperone, negative regulator of cspA transcription OS=Salmonella typhimurium (strain LT2 / SGSC1412 / ATCC 700720) GN=cspE PE=1 SV=1	7446	9.4849	3914.17	16	76.8116	1.623	61	8.2322	0.34566
P0A251	AHPC_SALTY	Alkyl hydroperoxide reductase subunit C OS=Salmonella typhimurium (strain LT2 / SGSC1412 / ATCC 700720) GN=ahpC PE=1 SV=2	20734	4.8486	10489	24	64.7059	2.5383	152	6.9172	0.341866
Q7CQW9	Q7CQW9_SALTY	Tol protein required for outer membrane integrity OS=Salmonella typhimurium (strain LT2 / SGSC1412 / ATCC 700720) GN=pal PE=3 SV=1	18853	6.3604	6204.11	14	53.4483	6.2717	89	8.0375	0.340955
P77983	KPYK1_SALTY	Pyruvate kinase I OS=Salmonella typhimurium (strain LT2 / SGSC1412 / ATCC 700720) GN=pykF PE=3 SV=2	50625	5.5313	6007.34	24	61.2766	2.5448	226	7.6029	0.338113
Q7CPL4	RL16_SALTY	50S ribosomal protein L16 OS=Salmonella typhimurium (strain LT2 / SGSC1412 / ATCC 700720) GN=rplP PE=3 SV=1	15184	11.6499	3866.1	6	40.4412	6.0944	39	7.9703	0.336795
P67093	USPG_SALTY	Universal stress protein G OS=Salmonella typhimurium (strain LT2 / SGSC1412 / ATCC 700720) GN=uspG PE=3 SV=1	15891	6.2036	4049.35	6	40.8451	2.388	58	7.6545	0.328803
P66932	TIG_SALTY	Trigger factor OS=Salmonella typhimurium (strain LT2 / SGSC1412 / ATCC 700720) GN=tig PE=3 SV=1	48036	4.6436	6879.99	44	62.037	3.9723	261	7.6963	0.327411
P62405	RL5_SALTY	50S ribosomal protein L5 OS=Salmonella typhimurium (strain LT2 / SGSC1412 / ATCC 700720) GN=rplE PE=3 SV=2	20304	9.7559	4051.63	12	64.2458	2.9376	98	8.1403	0.326579
Q7CP78	RIDA_SALTY	2-iminobutanoate/2-iminopropanoate deaminase OS=Salmonella typhimurium (strain LT2 / SGSC1412 / ATCC 700720) GN=ridA PE=1 SV=1	13567	4.938	6307.1	7	51.5625	1.379	62	6.2696	0.324668
P0A299	RL7_SALTY	50S ribosomal protein L7/L12 OS=Salmonella typhimurium (strain LT2 / SGSC1412 / ATCC 700720) GN=rplL PE=3 SV=2	12291	4.3989	2474.48	23	36.3636	1.6944	102	6.9952	0.32404
P0A1X0	SLYB_SALTY	Outer membrane lipoprotein SlyB OS=Salmonella typhimurium (strain LT2 / SGSC1412 / ATCC 700720) GN=slyB PE=1 SV=1	15538	9.7544	18767.9	17	29.0323	2.1337	111	7.1322	0.322531
P67904	RS10_SALTY	30S ribosomal protein S10 OS=Salmonella typhimurium (strain LT2 / SGSC1412 / ATCC 700720) GN=rpsJ PE=3 SV=1	11759	10.3271	8543.81	12	50.4854	1.908	79	7.5969	0.321178
P61179	RL22_SALTY	50S ribosomal protein L22 OS=Salmonella typhimurium (strain LT2 / SGSC1412 / ATCC 700720) GN=rplV PE=3 SV=1	12218	10.7124	9229.66	11	54.5455	1.2989	108	7.774	0.320217
P0A2B3	RS7_SALTY	30S ribosomal protein S7 OS=Salmonella typhimurium (strain LT2 / SGSC1412 / ATCC 700720) GN=rpsG PE=1 SV=2	17579	10.73	4791.83	19	62.8205	3.0627	115	6.4122	0.308919
P0A1E3	CYSK_SALTY	Cysteine synthase A OS=Salmonella typhimurium (strain LT2 / SGSC1412 / ATCC 700720) GN=cysK PE=1 SV=2	34514	5.7246	6025.31	18	64.3963	2.2107	149	7.3741	0.306184
Q8ZRT2	Q8ZRT2_SALTY	Pyruvate dehydrogenase E1 component OS=Salmonella typhimurium (strain LT2 / SGSC1412 / ATCC 700720) GN=aceE PE=4 SV=1	99516	5.3848	2538.53	44	45.434	3.8079	276	7.735	0.305233
Q7CQX6	Q7CQX6_SALTY	Putative glycosyl transferase OS=Salmonella typhimurium (strain LT2 / SGSC1412 / ATCC 700720) GN=STM0721 PE=4 SV=1	42881	9.5171	147.729	9	23.8727	3.9615	34	10.6324	0.302206
Q8ZK80	RL9_SALTY	50S ribosomal protein L9 OS=Salmonella typhimurium (strain LT2 / SGSC1412 / ATCC 700720) GN=rplI PE=3 SV=1	15774	7.7285	10074.9	16	69.7987	3.1321	115	7.1498	0.291749
Q7CPP7	RL21_SALTY	50S ribosomal protein L21 OS=Salmonella typhimurium (strain LT2 / SGSC1412 / ATCC 700720) GN=rplU PE=3 SV=1	11571	10.2905	3693.25	7	33.9806	1.2733	38	5.4819	0.291445
P0A7K0	RL11_SALTY	50S ribosomal protein L11 OS=Salmonella typhimurium (strain LT2 / SGSC1412 / ATCC 700720) GN=rplK PE=3 SV=2	14865	10.0884	9527.32	13	43.662	1.439	98	5.5581	0.286946
Q7CPZ4	GRPE_SALTY	Protein GrpE OS=Salmonella typhimurium (strain LT2 / SGSC1412 / ATCC 700720) GN=grpE PE=3 SV=1	21827	4.4941	7926.07	7	38.7755	3.4877	61	8.3925	0.28433
Q8ZRT1	Q8ZRT1_SALTY	Acetyltransferase component of pyruvate dehydrogenase complex OS=Salmonella typhimurium (strain LT2 / SGSC1412 / ATCC 700720) GN=aceF PE=3 SV=1	66098	4.9761	3231.72	35	53.2591	4.3363	219	8.2819	0.279792
P66955	TALB_SALTY	Transaldolase B OS=Salmonella typhimurium (strain LT2 / SGSC1412 / ATCC 700720) GN=talB PE=3 SV=2	35149	4.9087	7152.81	27	63.4069	5.1176	159	5.9878	0.277372
P0A2A1	RL19_SALTY	50S ribosomal protein L19 OS=Salmonella typhimurium (strain LT2 / SGSC1412 / ATCC 700720) GN=rplS PE=3 SV=2	13122	11.2383	4006.94	13	48.6957	4.6803	56	7.5666	0.271825
P66593	RS6_SALTY	30S ribosomal protein S6 OS=Salmonella typhimurium (strain LT2 / SGSC1412 / ATCC 700720) GN=rpsF PE=3 SV=1	15163	5.0786	4483.85	11	46.5649	3.0683	53	8.223	0.268945
Q8ZN59	Q8ZN59_SALTY	Inosine-5'-monophosphate dehydrogenase OS=Salmonella typhimurium (strain LT2 / SGSC1412 / ATCC 700720) GN=guaB PE=3 SV=1	51915	6.1655	2306.95	11	48.3607	0.9963	106	8.55	0.265445
Q7CPL7	RL17_SALTY	50S ribosomal protein L17 OS=Salmonella typhimurium (strain LT2 / SGSC1412 / ATCC 700720) GN=rplQ PE=3 SV=1	14385	11.4639	5067.15	13	44.8819	3.6133	73	7.9095	0.253226
P66313	RL6_SALTY	50S ribosomal protein L6 OS=Salmonella typhimurium (strain LT2 / SGSC1412 / ATCC 700720) GN=rplF PE=3 SV=2	18848	10.0913	5874.37	22	61.0169	4.1417	106	7.1391	0.252774
P0A1R0	HFQ_SALTY	RNA-binding protein Hfq OS=Salmonella typhimurium (strain LT2 / SGSC1412 / ATCC 700720) GN=hfq PE=1 SV=2	11126	7.9541	3449.06	4	22.549	10.7468	34	6.8029	0.251608
P0A9Y2	CSPA_SALTY	Cold shock protein CspA OS=Salmonella typhimurium (strain LT2 / SGSC1412 / ATCC 700720) GN=cspA PE=3 SV=2	7398	5.502	3986.14	8	45.7143	1.961	29	4.1587	0.25008
P58480	HTPG_SALTY	Chaperone protein HtpG OS=Salmonella typhimurium (strain LT2 / SGSC1412 / ATCC 700720) GN=htpG PE=3 SV=1	71442	4.9937	3193	38	53.8462	3.2127	266	8.8586	0.245238
Q8ZKA4	Q8ZKA4_SALTY	Component of modulator for protease specific for FtsH phage lambda cII repressor OS=Salmonella typhimurium (strain LT2 / SGSC1412 / ATCC 700720) GN=hflK PE=4 SV=1	45602	9.0366	4267.99	21	37.9475	4.0933	171	8.1408	0.240523
O54297	RS4_SALTY	30S ribosomal protein S4 OS=Salmonella typhimurium (strain LT2 / SGSC1412 / ATCC 700720) GN=rpsD PE=1 SV=3	23470	10.3799	8204.12	24	38.3495	1.274	106	6.5812	0.240485
Q8ZS18	Q8ZS18_SALTY	Threonine synthase OS=Salmonella typhimurium (strain LT2 / SGSC1412 / ATCC 700720) GN=thrC PE=4 SV=1	46958	5.5605	3712.03	16	38.5514	2.7199	119	8.8695	0.234016
P0A2A9	RS16_SALTY	30S ribosomal protein S16 OS=Salmonella typhimurium (strain LT2 / SGSC1412 / ATCC 700720) GN=rpsP PE=3 SV=1	9229	11.0552	7108.74	6	42.6829	1.3321	57	8.8743	0.231861
P26219	CDH_SALTY	CDP-diacylglycerol pyrophosphatase OS=Salmonella typhimurium (strain LT2 / SGSC1412 / ATCC 700720) GN=cdh PE=3 SV=2	28349	6.8613	7614.07	29	57.7689	4.6475	143	7.2317	0.228538
Q8ZNW4	Q8ZNW4_SALTY	2-keto-3-deoxygluconate 6-phosphate aldolase OS=Salmonella typhimurium (strain LT2 / SGSC1412 / ATCC 700720) GN=eda PE=4 SV=1	22172	5.8374	2800.34	10	66.1972	3.0768	80	6.1637	0.226637
Q8ZM07	Q8ZM07_SALTY	Putative alcohol dehydrogenase OS=Salmonella typhimurium (strain LT2 / SGSC1412 / ATCC 700720) GN=yqhD PE=4 SV=1	42057	5.1899	179.852	8	26.615	7.5802	30	9.5921	0.226314
Q7CP68	Q7CP68_SALTY	Hyperosmotically inducible periplasmic protein OS=Salmonella typhimurium (strain LT2 / SGSC1412 / ATCC 700720) GN=osmY PE=4 SV=1	21436	5.6895	4372.8	16	48.7805	2.6321	112	7.4711	0.225726
P0A1Z2	SKP_SALTY	Chaperone protein Skp OS=Salmonella typhimurium (strain LT2 / SGSC1412 / ATCC 700720) GN=skp PE=1 SV=1	17894	10.2539	2677.52	9	49.6894	4.7599	67	7.978	0.224285
P60446	RL3_SALTY	50S ribosomal protein L3 OS=Salmonella typhimurium (strain LT2 / SGSC1412 / ATCC 700720) GN=rplC PE=3 SV=1	22233	10.2524	3380.49	8	26.3158	2.0874	55	5.2707	0.224138
Q8ZNS7	Q8ZNS7_SALTY	Putative porin OS=Salmonella typhimurium (strain LT2 / SGSC1412 / ATCC 700720) GN=ompS PE=3 SV=1	43590	4.1396	764.984	7	14.3216	9.9026	36	8.0664	0.223276
P0A1R8	DBHB_SALTY	DNA-binding protein HU-beta OS=Salmonella typhimurium (strain LT2 / SGSC1412 / ATCC 700720) GN=hupB PE=3 SV=1	9234	10.2393	6322.45	12	52.2222	2.0533	55	6.1774	0.213721
Q7CPJ3	Q7CPJ3_SALTY	Putative inner membrane lipoprotein OS=Salmonella typhimurium (strain LT2 / SGSC1412 / ATCC 700720) GN=STM3580 PE=4 SV=1	19675	5.1533	6408.56	11	82.1622	4.686	129	6.883	0.213387
Q8ZK81	RS18_SALTY	30S ribosomal protein S18 OS=Salmonella typhimurium (strain LT2 / SGSC1412 / ATCC 700720) GN=rpsR PE=3 SV=3	9065	11.1152	7161.33	6	53.3333	0.9751	30	3.9853	0.21277
Q8ZQR7	Q8ZQR7_SALTY	Molybdate transporter OS=Salmonella typhimurium (strain LT2 / SGSC1412 / ATCC 700720) GN=modA PE=4 SV=1	27503	6.6445	4122.54	24	71.5953	5.3942	158	7.8591	0.212231
P06185	PGTE_SALTY	Outer membrane protease E OS=Salmonella typhimurium (strain LT2 / SGSC1412 / ATCC 700720) GN=pgtE PE=3 SV=2	35032	5.1416	2406.68	22	41.0256	3.423	99	8.2549	0.212054
P0AA28	THIO_SALTY	Thioredoxin-1 OS=Salmonella typhimurium (strain LT2 / SGSC1412 / ATCC 700720) GN=trxA PE=3 SV=2	11799	4.4751	5480.4	10	67.8899	1.1621	73	7.1766	0.211633
P0DM80	PHOQ_SALTY	Virulence sensor histidine kinase PhoQ OS=Salmonella typhimurium (strain LT2 / SGSC1412 / ATCC 700720) GN=phoQ PE=1 SV=1	55431	5.9297	366.34	8	21.3552	5.3988	49	9.5068	0.209133
P0A249	PT1_SALTY	Phosphoenolpyruvate-protein phosphotransferase OS=Salmonella typhimurium (strain LT2 / SGSC1412 / ATCC 700720) GN=ptsI PE=3 SV=1	63328	4.5586	2189.89	18	32.1739	6.2498	144	9.6572	0.203979
P14846	CARB_SALTY	Carbamoyl-phosphate synthase large chain OS=Salmonella typhimurium (strain LT2 / SGSC1412 / ATCC 700720) GN=carB PE=3 SV=4	118064	4.9453	359.126	21	27.3488	5.5924	109	10.6973	0.202479
Q8ZPY0	Q8ZPY0_SALTY	Putative periplasmic protein OS=Salmonella typhimurium (strain LT2 / SGSC1412 / ATCC 700720) GN=STM1263 PE=4 SV=1	24608	7.5146	2306.47	17	42.7907	2.8101	76	8.7035	0.201607
P0A2C7	POTD_SALTY	Spermidine/putrescine-binding periplasmic protein OS=Salmonella typhimurium (strain LT2 / SGSC1412 / ATCC 700720) GN=potD PE=3 SV=1	38996	4.9863	3233.88	24	56.3218	1.8868	154	8.436	0.201539
Q7CP96	Q7CP96_SALTY	Protein HflC OS=Salmonella typhimurium (strain LT2 / SGSC1412 / ATCC 700720) GN=hflC PE=3 SV=1	37521	5.8843	1559.32	17	56.8862	3.7756	108	10.0275	0.200666
P66643	RS9_SALTY	30S ribosomal protein S9 OS=Salmonella typhimurium (strain LT2 / SGSC1412 / ATCC 700720) GN=rpsI PE=1 SV=2	14817	11.3379	1989.08	12	41.5385	1.5669	56	6.7568	0.199373
P26982	DEGP_SALTY	Periplasmic serine endoprotease DegP OS=Salmonella typhimurium (strain LT2 / SGSC1412 / ATCC 700720) GN=degP PE=3 SV=1	49284	9.1948	3717.34	28	46.9474	2.8252	209	8.3788	0.197982
P0A1S0	IHFA_SALTY	Integration host factor subunit alpha OS=Salmonella typhimurium (strain LT2 / SGSC1412 / ATCC 700720) GN=ihfA PE=3 SV=1	11360	9.8804	6119.78	11	39.3939	2.0479	54	6.8401	0.197698
Q8ZRP4	DAPD_SALTY	2,3,4,5-tetrahydropyridine-2,6-dicarboxylate N-succinyltransferase OS=Salmonella typhimurium (strain LT2 / SGSC1412 / ATCC 700720) GN=dapD PE=3 SV=1	29833	5.3936	5217.38	16	50	4.5711	120	8.4739	0.197168
P16657	FABI_SALTY	Enoyl-[acyl-carrier-protein] reductase [NADH] FabI OS=Salmonella typhimurium (strain LT2 / SGSC1412 / ATCC 700720) GN=fabI PE=1 SV=3	27742	5.4756	3995.26	19	54.9618	3.3333	101	8.1373	0.191837
Q7CPL5	RL14_SALTY	50S ribosomal protein L14 OS=Salmonella typhimurium (strain LT2 / SGSC1412 / ATCC 700720) GN=rplN PE=3 SV=1	13559	10.8911	4773.39	6	28.4553	1.6979	53	6.7466	0.190113
P65534	NDK_SALTY	Nucleoside diphosphate kinase OS=Salmonella typhimurium (strain LT2 / SGSC1412 / ATCC 700720) GN=ndk PE=3 SV=2	15511	5.4463	6886.04	8	49.6503	1.8035	65	6.6623	0.189612
P0AA13	RL13_SALTY	50S ribosomal protein L13 OS=Salmonella typhimurium (strain LT2 / SGSC1412 / ATCC 700720) GN=rplM PE=3 SV=1	16008	10.2744	4431.64	26	59.1549	3.5699	95	6.7133	0.189152
Q8ZM75	GCSH_SALTY	Glycine cleavage system H protein OS=Salmonella typhimurium (strain LT2 / SGSC1412 / ATCC 700720) GN=gcvH PE=3 SV=3	13832	3.7603	10772.8	6	25.5814	1.5369	56	5.9263	0.188529
P66738	RRF_SALTY	Ribosome-recycling factor OS=Salmonella typhimurium (strain LT2 / SGSC1412 / ATCC 700720) GN=frr PE=3 SV=1	20542	8.5986	2619.12	6	41.0811	0.4745	59	6.5909	0.18823
Q7CQU5	Q7CQU5_SALTY	Thioredoxin reductase OS=Salmonella typhimurium (strain LT2 / SGSC1412 / ATCC 700720) GN=trxB PE=3 SV=1	34662	5.0596	1784.44	8	45.3416	1.4815	69	7.053	0.186065
Q7CR43	Q7CR43_SALTY	Response regulator in two-component regulatory system with PhoR (Or CreC) OS=Salmonella typhimurium (strain LT2 / SGSC1412 / ATCC 700720) GN=phoB PE=4 SV=1	26386	5.7437	2750.69	6	36.6812	4.5896	57	7.8237	0.175373
Q7CPR3	Q7CPR3_SALTY	Putative inner membrane protein OS=Salmonella typhimurium (strain LT2 / SGSC1412 / ATCC 700720) GN=yqjD PE=4 SV=1	11078	9.6211	4255.99	3	25.7426	0.1632	33	6.3114	0.175094
P0A2B1	RS20_SALTY	30S ribosomal protein S20 OS=Salmonella typhimurium (strain LT2 / SGSC1412 / ATCC 700720) GN=rpsT PE=3 SV=2	9649	11.6265	7611.95	11	44.8276	1.8122	54	7.1927	0.173882
Q7CQ01	CLPB_SALTY	Chaperone protein ClpB OS=Salmonella typhimurium (strain LT2 / SGSC1412 / ATCC 700720) GN=clpB PE=3 SV=1	95377	5.1519	3342.81	53	54.4924	4.9651	323	8.4938	0.17205
Q8ZRN1	METQ_SALTY	D-methionine-binding lipoprotein MetQ OS=Salmonella typhimurium (strain LT2 / SGSC1412 / ATCC 700720) GN=metQ PE=3 SV=1	29417	5.2295	3430.41	14	60.1476	2.8812	108	6.8875	0.171884
Q8ZLZ4	Q8ZLZ4_SALTY	Outer membrane channel OS=Salmonella typhimurium (strain LT2 / SGSC1412 / ATCC 700720) GN=tolC PE=4 SV=1	53653	5.2734	2891.18	14	51.9348	3.0478	130	8.6667	0.170072
Q8ZLQ5	Q8ZLQ5_SALTY	Stringent starvation protein A OS=Salmonella typhimurium (strain LT2 / SGSC1412 / ATCC 700720) GN=sspA PE=3 SV=1	24233	5.0508	674.472	10	51.4151	2.5894	51	7.8372	0.168533
Q8ZQT5	TOLB_SALTY	Protein TolB OS=Salmonella typhimurium (strain LT2 / SGSC1412 / ATCC 700720) GN=tolB PE=3 SV=1	46120	8.7275	2057.86	13	37.907	1.2139	91	7.69	0.166827
P55900	SERC_SALTY	Phosphoserine aminotransferase OS=Salmonella typhimurium (strain LT2 / SGSC1412 / ATCC 700720) GN=serC PE=1 SV=2	39806	5.1753	2218.5	11	37.8453	2.1384	93	8.6949	0.165651
Q7CR49	Q7CR49_SALTY	Putative periplasmic protein OS=Salmonella typhimurium (strain LT2 / SGSC1412 / ATCC 700720) GN=yahO PE=1 SV=1	9913	9.0352	3297.09	4	65.9341	1.7254	45	7.3365	0.1647
P0AA19	OMPR_SALTY	Transcriptional regulatory protein OmpR OS=Salmonella typhimurium (strain LT2 / SGSC1412 / ATCC 700720) GN=ompR PE=3 SV=1	27336	5.9941	2031.52	11	52.7197	2.6823	68	7.1418	0.164221
P14062	6PGD_SALTY	6-phosphogluconate dehydrogenase, decarboxylating OS=Salmonella typhimurium (strain LT2 / SGSC1412 / ATCC 700720) GN=gnd PE=3 SV=1	51363	5.0405	2662.89	29	60.0427	5.0972	169	8.6296	0.161476
Q8ZRD7	Q8ZRD7_SALTY	Protein translocase subunit SecD OS=Salmonella typhimurium (strain LT2 / SGSC1412 / ATCC 700720) GN=secD PE=3 SV=1	66545	9.1157	167.901	14	27.4797	9.2621	50	11.2807	0.160584
P0A2C9	FABG_SALTY	3-oxoacyl-[acyl-carrier-protein] reductase FabG OS=Salmonella typhimurium (strain LT2 / SGSC1412 / ATCC 700720) GN=fabG PE=1 SV=1	25529	7.1909	4214.92	20	67.623	3.6315	113	9.11	0.158967
Q8ZPD6	YNCE_SALTY	Uncharacterized protein YncE OS=Salmonella typhimurium (strain LT2 / SGSC1412 / ATCC 700720) GN=yncE PE=3 SV=1	38480	9.5552	2565.08	19	52.6912	4.3854	135	7.8454	0.158928
Q8ZJV8	DEOC_SALTY	Deoxyribose-phosphate aldolase OS=Salmonella typhimurium (strain LT2 / SGSC1412 / ATCC 700720) GN=deoC PE=3 SV=2	27667	5.8154	1576.25	8	40.9266	4.6088	58	8.7485	0.15884
Q8ZQE4	MACB_SALTY	Macrolide export ATP-binding/permease protein MacB OS=Salmonella typhimurium (strain LT2 / SGSC1412 / ATCC 700720) GN=macB PE=3 SV=1	70724	7.8574	102.991	13	23.1481	13.9309	48	11.8208	0.156586
Q7CPE4	ATPF_SALTY	ATP synthase subunit b OS=Salmonella typhimurium (strain LT2 / SGSC1412 / ATCC 700720) GN=atpF PE=3 SV=1	17354	5.9136	2418.26	13	62.1795	5.7329	86	7.9007	0.156183
Q7CQP6	Q7CQP6_SALTY	Scaffolding protein for murein-synthesizing holoenzyme OS=Salmonella typhimurium (strain LT2 / SGSC1412 / ATCC 700720) GN=mipA PE=4 SV=1	27974	5.417	2207.62	3	16.5323	2.0738	39	6.7219	0.156165
P60428	RL2_SALTY	50S ribosomal protein L2 OS=Salmonella typhimurium (strain LT2 / SGSC1412 / ATCC 700720) GN=rplB PE=3 SV=1	29801	11.3511	3044.73	22	47.9853	2.8283	113	7.3108	0.155909
Q7CQX4	Q7CQX4_SALTY	Dihydrolipoyllysine-residue succinyltransferase component of 2-oxoglutarate dehydrogenase complex OS=Salmonella typhimurium (strain LT2 / SGSC1412 / ATCC 700720) GN=sucB PE=3 SV=1	43830	5.3628	868.957	14	32.8358	2.734	78	9.5957	0.154959
P0A1V6	KPRS_SALTY	Ribose-phosphate pyrophosphokinase OS=Salmonella typhimurium (strain LT2 / SGSC1412 / ATCC 700720) GN=prs PE=3 SV=2	34194	5.0625	1474.61	9	38.0952	5.9132	67	8.211	0.154401
Q7CQV9	DPS_SALTY	DNA protection during starvation protein OS=Salmonella typhimurium (strain LT2 / SGSC1412 / ATCC 700720) GN=dps PE=3 SV=3	18705	5.6616	8832.55	18	77.2455	5.3801	106	7.9253	0.151755
P0A7L6	RL20_SALTY	50S ribosomal protein L20 OS=Salmonella typhimurium (strain LT2 / SGSC1412 / ATCC 700720) GN=rplT PE=3 SV=2	13488	11.8726	3631.24	8	22.8814	1.7879	31	3.5125	0.151392
Q7CQT9	Q7CQT9_SALTY	30S ribosomal protein S1 OS=Salmonella typhimurium (strain LT2 / SGSC1412 / ATCC 700720) GN=rpsA PE=3 SV=1	61135	4.6875	1649.26	35	52.4237	5.7416	200	9.501	0.147296
P64394	IHFB_SALTY	Integration host factor subunit beta OS=Salmonella typhimurium (strain LT2 / SGSC1412 / ATCC 700720) GN=ihfB PE=3 SV=1	10614	9.7852	2353.33	3	15.9574	2.7418	22	4.2389	0.146766
P0A1S4	STPA_SALTY	DNA-binding protein StpA OS=Salmonella typhimurium (strain LT2 / SGSC1412 / ATCC 700720) GN=stpA PE=3 SV=1	15477	9.2446	2771.31	8	51.8797	3.3281	65	7.9192	0.144943
Q8ZKW8	ATPG_SALTY	ATP synthase gamma chain OS=Salmonella typhimurium (strain LT2 / SGSC1412 / ATCC 700720) GN=atpG PE=2 SV=1	31535	9.2593	2946.45	18	62.3693	6.9632	109	8.3229	0.144689
Q7CQU1	Q7CQU1_SALTY	Pyruvate formate lyase I, induced anaerobically OS=Salmonella typhimurium (strain LT2 / SGSC1412 / ATCC 700720) GN=pflB PE=4 SV=1	84950	5.6719	1671.57	42	50.5263	6.2653	242	9.5116	0.14416
Q8ZM63	Q8ZM63_SALTY	Transketolase OS=Salmonella typhimurium (strain LT2 / SGSC1412 / ATCC 700720) GN=tktA PE=3 SV=1	72087	5.2969	780.42	27	43.1373	5.1156	140	10.179	0.142895
Q7CQ97	Q7CQ97_SALTY	3-oxoacyl-[acyl-carrier-protein] synthase I OS=Salmonella typhimurium (strain LT2 / SGSC1412 / ATCC 700720) GN=fbaB PE=4 SV=1	38064	6.4263	998.086	16	52.8571	6.3905	101	9.2466	0.142337
Q7CPQ6	Q7CPQ6_SALTY	Putative periplasmic protein OS=Salmonella typhimurium (strain LT2 / SGSC1412 / ATCC 700720) GN=yraP PE=4 SV=1	20084	9.6533	1492.05	8	43.4555	4.1463	60	6.6619	0.142111
P06173	RPOB_SALTY	DNA-directed RNA polymerase subunit beta OS=Salmonella typhimurium (strain LT2 / SGSC1412 / ATCC 700720) GN=rpoB PE=3 SV=2	150506	4.9556	1190.93	46	43.1446	6.589	290	9.5489	0.141543
P65215	KDSA_SALTY	2-dehydro-3-deoxyphosphooctonate aldolase OS=Salmonella typhimurium (strain LT2 / SGSC1412 / ATCC 700720) GN=kdsA PE=3 SV=1	30775	5.8579	1217.11	15	44.7183	1.5206	73	7.9287	0.140651
H9L410	H9L410_SALTY	Chorismate mutase OS=Salmonella typhimurium (strain LT2 / SGSC1412 / ATCC 700720) GN=STM1269 PE=4 SV=1	20568	8.2544	2065.72	4	37.0166	6.7911	39	9.9018	0.140386
Q8ZN72	Q8ZN72_SALTY	Outer membrane protein assembly factor BamC OS=Salmonella typhimurium (strain LT2 / SGSC1412 / ATCC 700720) GN=nlpB PE=3 SV=1	36914	5.71	1974.92	17	65.9884	1.4275	108	7.443	0.138251
Q8ZPG8	Q8ZPG8_SALTY	Putative hydrolase OS=Salmonella typhimurium (strain LT2 / SGSC1412 / ATCC 700720) GN=STM1540 PE=4 SV=1	40255	6.8496	1814.59	14	53.168	3.3505	93	9.0262	0.137868
P69226	IF1_SALTY	Translation initiation factor IF-1 OS=Salmonella typhimurium (strain LT2 / SGSC1412 / ATCC 700720) GN=infA PE=3 SV=2	8244	9.7441	4252.56	3	30.5556	4.1143	23	9.3454	0.136565
P0A2C5	RBSB_SALTY	D-ribose-binding periplasmic protein OS=Salmonella typhimurium (strain LT2 / SGSC1412 / ATCC 700720) GN=rbsB PE=1 SV=1	30943	9.2021	2082.69	13	45.9459	5.9074	98	7.7662	0.136446
Q7CPV8	Q7CPV8_SALTY	Putative lipoprotein OS=Salmonella typhimurium (strain LT2 / SGSC1412 / ATCC 700720) GN=ygdI PE=1 SV=1	8120	7.0093	1267.53	4	41.3333	3.6098	30	7.7294	0.134497
Q7CQR3	Q7CQR3_SALTY	Glutaredoxin 2 OS=Salmonella typhimurium (strain LT2 / SGSC1412 / ATCC 700720) GN=grxB PE=1 SV=1	24447	8.1812	2903.92	4	31.1628	2.0328	39	8.265	0.133878
P0A2F6	SSB1_SALTY	Single-stranded DNA-binding protein 1 OS=Salmonella typhimurium (strain LT2 / SGSC1412 / ATCC 700720) GN=ssb PE=3 SV=2	19062	5.2939	3516.82	6	42.6136	7.1823	43	8.3372	0.133272
Q8ZQ40	NQOR_SALTY	NAD(P)H dehydrogenase (quinone) OS=Salmonella typhimurium (strain LT2 / SGSC1412 / ATCC 700720) GN=STM1119 PE=3 SV=3	20854	5.7422	2768.72	7	51.5152	0.911	67	6.4062	0.132988
P0A7X0	RS8_SALTY	30S ribosomal protein S8 OS=Salmonella typhimurium (strain LT2 / SGSC1412 / ATCC 700720) GN=rpsH PE=3 SV=2	14117	9.8467	1015.91	8	41.5385	2.9661	43	8.1455	0.132575
P0A2H9	DSBA_SALTY	Thiol:disulfide interchange protein DsbA OS=Salmonella typhimurium (strain LT2 / SGSC1412 / ATCC 700720) GN=dsbA PE=1 SV=1	22896	5.5488	1986.58	7	38.6473	7.8423	59	9.4351	0.130861
Q8ZML4	Q8ZML4_SALTY	Putative inner membrane protein OS=Salmonella typhimurium (strain LT2 / SGSC1412 / ATCC 700720) GN=ygaM PE=4 SV=1	12352	6.9478	1030.14	6	41.0714	2.0796	32	7.508	0.130773
Q8ZLJ4	HSLO_SALTY	33 kDa chaperonin OS=Salmonella typhimurium (strain LT2 / SGSC1412 / ATCC 700720) GN=hslO PE=3 SV=2	32349	4.229	292.565	3	10.6164	5.1878	24	8.6689	0.1302
Q8ZLT3	PNP_SALTY	Polyribonucleotide nucleotidyltransferase OS=Salmonella typhimurium (strain LT2 / SGSC1412 / ATCC 700720) GN=pnp PE=1 SV=1	76990	4.8589	1466.15	19	31.6456	4.7159	125	7.189	0.130136
Q8ZP45	Q8ZP45_SALTY	Aldehyde-alcohol dehydrogenase OS=Salmonella typhimurium (strain LT2 / SGSC1412 / ATCC 700720) GN=adhE PE=3 SV=1	96154	6.1934	758.059	29	41.4798	3.6764	152	10.5303	0.127715
P60626	RL24_SALTY	50S ribosomal protein L24 OS=Salmonella typhimurium (strain LT2 / SGSC1412 / ATCC 700720) GN=rplX PE=3 SV=2	11309	10.7183	2303.74	11	62.5	6.45	60	8.0131	0.126362
Q7CQR0	Q7CQR0_SALTY	Uncharacterized protein OS=Salmonella typhimurium (strain LT2 / SGSC1412 / ATCC 700720) GN=ycfF PE=4 SV=1	13260	5.7173	3787.63	2	25.2101	1.1197	31	6.0766	0.123878
Q7CPH8	SECB_SALTY	Protein-export protein SecB OS=Salmonella typhimurium (strain LT2 / SGSC1412 / ATCC 700720) GN=secB PE=3 SV=1	17234	4.0591	669.192	4	22.5806	1.1667	26	6.2043	0.123702
Q8ZPY8	Q8ZPY8_SALTY	Putative periplasmic protein OS=Salmonella typhimurium (strain LT2 / SGSC1412 / ATCC 700720) GN=STM1249 PE=1 SV=1	12567	6.5845	596.082	2	14.9123	0.2276	21	8.9167	0.123069
Q8ZRU0	Q8ZRU0_SALTY	Cell division protein FtsZ OS=Salmonella typhimurium (strain LT2 / SGSC1412 / ATCC 700720) GN=ftsZ PE=3 SV=1	40298	4.4458	2410.08	19	56.1358	5.5838	134	8.0116	0.122962
P66170	RL29_SALTY	50S ribosomal protein L29 OS=Salmonella typhimurium (strain LT2 / SGSC1412 / ATCC 700720) GN=rpmC PE=3 SV=1	7255	10.5161	8956.28	3	46.0317	1.6739	31	6.5781	0.12279
Q7CQ36	Q7CQ36_SALTY	3-oxoacyl-[acyl-carrier-protein] synthase I OS=Salmonella typhimurium (strain LT2 / SGSC1412 / ATCC 700720) GN=fabB PE=3 SV=1	42345	4.8765	980.562	16	30.4455	4.068	77	10.1286	0.122246
P05989	ILVC_SALTY	Ketol-acid reductoisomerase OS=Salmonella typhimurium (strain LT2 / SGSC1412 / ATCC 700720) GN=ilvC PE=2 SV=4	53907	4.957	1123.91	18	47.6578	7.239	102	10.0022	0.120747
P06204	PYRC_SALTY	Dihydroorotase OS=Salmonella typhimurium (strain LT2 / SGSC1412 / ATCC 700720) GN=pyrC PE=1 SV=3	38580	5.8345	857.923	11	45.6897	1.9162	63	7.9749	0.119855
Q7CQK9	Q7CQK9_SALTY	Glutaredoxin OS=Salmonella typhimurium (strain LT2 / SGSC1412 / ATCC 700720) GN=ydhD PE=3 SV=1	12899	4.5791	2579.19	3	39.1304	1.1786	34	7.7974	0.119482
Q8ZKI4	G6PI_SALTY	Glucose-6-phosphate isomerase OS=Salmonella typhimurium (strain LT2 / SGSC1412 / ATCC 700720) GN=pgi PE=3 SV=1	61390	5.8682	782.776	25	42.2587	4.4195	132	9.1901	0.118983
O84944	SSEA_SALTY	Type III secretion system chaperone SseA OS=Salmonella typhimurium (strain LT2 / SGSC1412 / ATCC 700720) GN=sseA PE=1 SV=1	12441	10.2363	1266.06	4	50.9259	4.6475	32	11.4117	0.118866
Q7CPB2	YJBJ_SALTY	UPF0337 protein YjbJ OS=Salmonella typhimurium (strain LT2 / SGSC1412 / ATCC 700720) GN=yjbJ PE=3 SV=1	8454	7.166	563.806	3	41.4286	7.5767	21	7.0315	0.118101
P0A2R4	RPOC_SALTY	DNA-directed RNA polymerase subunit beta' OS=Salmonella typhimurium (strain LT2 / SGSC1412 / ATCC 700720) GN=rpoC PE=3 SV=1	155136	6.4072	687.405	36	36.9581	4.6075	218	8.6095	0.117758
P02910	HISJ_SALTY	Histidine-binding periplasmic protein OS=Salmonella typhimurium (strain LT2 / SGSC1412 / ATCC 700720) GN=hisJ PE=1 SV=1	28361	5.9487	744.103	12	58.8462	1.6437	65	8.4705	0.11715
Q8ZPY6	Q8ZPY6_SALTY	Putative molecular chaperone (Small heat shock protein) OS=Salmonella typhimurium (strain LT2 / SGSC1412 / ATCC 700720) GN=STM1251 PE=3 SV=1	17540	5.2852	1248.6	7	60	5.0705	54	10.8001	0.116778
P37439	PTGCB_SALTY	PTS system glucose-specific EIICB component OS=Salmonella typhimurium (strain LT2 / SGSC1412 / ATCC 700720) GN=ptsG PE=3 SV=2	50464	8.6587	673.171	10	24.7379	1.2724	61	9.3785	0.116425
Q7CQ55	Q7CQ55_SALTY	Putative inner membrane protein OS=Salmonella typhimurium (strain LT2 / SGSC1412 / ATCC 700720) GN=elaB PE=4 SV=1	11629	5.1958	4269.43	7	37.8641	1.9614	43	5.8411	0.116248
P0A7Z7	RPOA_SALTY	DNA-directed RNA polymerase subunit alpha OS=Salmonella typhimurium (strain LT2 / SGSC1412 / ATCC 700720) GN=rpoA PE=3 SV=1	36489	4.7813	1278.02	24	46.2006	2.6006	103	7.3558	0.11621
P65692	PFKA_SALTY	ATP-dependent 6-phosphofructokinase OS=Salmonella typhimurium (strain LT2 / SGSC1412 / ATCC 700720) GN=pfkA PE=3 SV=1	34892	5.4712	817.48	13	42.1875	8.8684	62	8.0466	0.115033
Q8ZNV2	SYD_SALTY	Aspartate--tRNA ligase OS=Salmonella typhimurium (strain LT2 / SGSC1412 / ATCC 700720) GN=aspS PE=3 SV=1	65624	5.3145	1161.88	26	37.6271	5.5333	136	9.7631	0.114769
Q7CR87	SURA_SALTY	Chaperone SurA OS=Salmonella typhimurium (strain LT2 / SGSC1412 / ATCC 700720) GN=surA PE=3 SV=1	47221	6.8789	1478.41	18	57.9439	4.544	133	8.7237	0.113005
Q7CPM1	Q7CPM1_SALTY	AcetylCoA carboxylase, BCCP subunit OS=Salmonella typhimurium (strain LT2 / SGSC1412 / ATCC 700720) GN=accB PE=4 SV=1	16676	4.4136	2314.89	7	70.5128	5.6212	50	7.1165	0.112711
P64036	EFP_SALTY	Elongation factor P OS=Salmonella typhimurium (strain LT2 / SGSC1412 / ATCC 700720) GN=efp PE=3 SV=2	20610	4.7007	1459.61	6	25	8.2385	31	6.4474	0.111221
Q8ZRC9	YAJQ_SALTY	UPF0234 protein YajQ OS=Salmonella typhimurium (strain LT2 / SGSC1412 / ATCC 700720) GN=yajQ PE=3 SV=2	18307	5.417	2993.55	11	72.3926	2.7119	83	9.9544	0.110985
P0A803	RPOZ_SALTY	DNA-directed RNA polymerase subunit omega OS=Salmonella typhimurium (strain LT2 / SGSC1412 / ATCC 700720) GN=rpoZ PE=3 SV=1	10230	4.6685	1004.3	4	60.4396	2.3448	22	7.8712	0.110663
Q7CP91	Q7CP91_SALTY	Peptidyl-prolyl cis-trans isomerase OS=Salmonella typhimurium (strain LT2 / SGSC1412 / ATCC 700720) GN=fklB PE=4 SV=1	23722	4.5776	1931.76	8	36.8182	7.0801	62	8.9789	0.110222
Q8ZNI2	Q8ZNI2_SALTY	Putative outer membrane protein OS=Salmonella typhimurium (strain LT2 / SGSC1412 / ATCC 700720) GN=STM2245 PE=4 SV=1	20563	9.082	1265.28	12	18.7166	1.5021	36	5.9383	0.109388
P0A1G5	DKSA_SALTY	RNA polymerase-binding transcription factor DksA OS=Salmonella typhimurium (strain LT2 / SGSC1412 / ATCC 700720) GN=dksA PE=3 SV=1	17504	4.8721	1311.72	5	19.8675	1.8949	24	10.151	0.109076
P0AA02	NUSG_SALTY	Transcription termination/antitermination protein NusG OS=Salmonella typhimurium (strain LT2 / SGSC1412 / ATCC 700720) GN=nusG PE=3 SV=2	20532	6.4028	961.44	11	52.4862	4.143	52	10.5905	0.109016
Q7CQ10	ISCR_SALTY	HTH-type transcriptional regulator IscR OS=Salmonella typhimurium (strain LT2 / SGSC1412 / ATCC 700720) GN=iscR PE=3 SV=1	17379	7.1704	332.938	3	25.6098	12.7195	27	7.2621	0.109016
P66869	SUCC_SALTY	Succinyl-CoA ligase [ADP-forming] subunit beta OS=Salmonella typhimurium (strain LT2 / SGSC1412 / ATCC 700720) GN=sucC PE=3 SV=1	41454	5.1226	1262.53	21	55.6701	5.6735	137	10.3575	0.107243
P0A2M5	UPP_SALTY	Uracil phosphoribosyltransferase OS=Salmonella typhimurium (strain LT2 / SGSC1412 / ATCC 700720) GN=upp PE=3 SV=1	22518	5.1694	2427.32	10	43.75	1.858	72	7.5359	0.107183
Q8ZP75	Q8ZP75_SALTY	Putative cytoplasmic protein OS=Salmonella typhimurium (strain LT2 / SGSC1412 / ATCC 700720) GN=STM1672 PE=4 SV=1	41412	9.2754	794.921	14	49.3225	4.9509	97	9.4662	0.106724
Q8ZPP1	Q8ZPP1_SALTY	Riboflavin synthase, alpha chain OS=Salmonella typhimurium (strain LT2 / SGSC1412 / ATCC 700720) GN=ribE PE=4 SV=1	23377	5.439	1564.44	12	39.4366	2.8715	55	10.184	0.106242
P40676	SLYA_SALTY	Transcriptional regulator SlyA OS=Salmonella typhimurium (strain LT2 / SGSC1412 / ATCC 700720) GN=slyA PE=1 SV=3	16411	6.2593	1896.22	4	20.8333	1.0673	24	4.7495	0.105714
Q8ZR16	Q8ZR16_SALTY	RNase I OS=Salmonella typhimurium (strain LT2 / SGSC1412 / ATCC 700720) GN=rna PE=3 SV=1	29508	8.0786	1287.72	5	15.2985	3.0286	42	8.1498	0.104979
Q8ZP84	USPE_SALTY	Universal stress protein E OS=Salmonella typhimurium (strain LT2 / SGSC1412 / ATCC 700720) GN=uspE PE=1 SV=3	35616	5.0083	585.626	6	33.3333	6.1187	38	10.3051	0.103005
Q8ZK71	MSRA_SALTY	Peptide methionine sulfoxide reductase MsrA OS=Salmonella typhimurium (strain LT2 / SGSC1412 / ATCC 700720) GN=msrA PE=3 SV=1	23382	5.5269	2354.52	6	23.1132	2.4841	34	7.4455	0.102577
O54296	RS11_SALTY	30S ribosomal protein S11 OS=Salmonella typhimurium (strain LT2 / SGSC1412 / ATCC 700720) GN=rpsK PE=3 SV=2	13822	11.7407	2772.55	5	55.814	7.9325	44	9.4173	0.101558
Q8ZPG5	Q8ZPG5_SALTY	PhoPQ-regulated protein OS=Salmonella typhimurium (strain LT2 / SGSC1412 / ATCC 700720) GN=pqaA PE=4 SV=1	59233	6.9653	1033.85	11	28.9575	2.5751	59	8.4843	0.101
Q8ZRN4	Q8ZRN4_SALTY	Modulator of Rho-dependent transcription termination OS=Salmonella typhimurium (strain LT2 / SGSC1412 / ATCC 700720) GN=rof PE=4 SV=1	9606	4.2744	326.473	5	53.4884	12.359	34	12.2945	0.100814
H9L493	H9L493_SALTY	Fur regulated Salmonella iron transporter OS=Salmonella typhimurium (strain LT2 / SGSC1412 / ATCC 700720) GN=sitB PE=3 SV=1	29763	6.3354	1554.22	7	43.5897	9.6185	62	9.3312	0.100363
Q8ZRJ5	Q8ZRJ5_SALTY	Aminoacyl-histidine dipeptidase (Peptidase D) OS=Salmonella typhimurium (strain LT2 / SGSC1412 / ATCC 700720) GN=pepD PE=4 SV=1	52403	5.0215	862.331	14	39.1753	4.5021	92	8.8597	0.0995982
P0A295	RHO_SALTY	Transcription termination factor Rho OS=Salmonella typhimurium (strain LT2 / SGSC1412 / ATCC 700720) GN=rho PE=3 SV=1	46963	6.876	1250.55	21	43.9141	3.4097	119	6.9874	0.0993041
Q8ZM80	YGFZ_SALTY	tRNA-modifying protein YgfZ OS=Salmonella typhimurium (strain LT2 / SGSC1412 / ATCC 700720) GN=ygfZ PE=3 SV=1	35949	4.938	1743.45	12	34.0491	8.1832	72	8.3088	0.0983736
P66764	METK_SALTY	S-adenosylmethionine synthase OS=Salmonella typhimurium (strain LT2 / SGSC1412 / ATCC 700720) GN=metK PE=3 SV=2	41926	4.9102	1552.08	8	37.7604	5.2916	55	8.5917	0.0977855
P65882	PURA_SALTY	Adenylosuccinate synthetase OS=Salmonella typhimurium (strain LT2 / SGSC1412 / ATCC 700720) GN=purA PE=3 SV=2	47347	5.1519	1058.7	18	43.5185	6.3702	109	9.8649	0.0977454
P37430	NUSA_SALTY	Transcription termination/antitermination protein NusA OS=Salmonella typhimurium (strain LT2 / SGSC1412 / ATCC 700720) GN=nusA PE=3 SV=2	55391	4.2993	703.835	15	42.4	7.6216	86	9.3881	0.0969819
P63557	ARGB_SALTY	Acetylglutamate kinase OS=Salmonella typhimurium (strain LT2 / SGSC1412 / ATCC 700720) GN=argB PE=3 SV=1	26990	5.3862	260.555	5	33.7209	5.7713	37	10.1844	0.0961984
Q8ZRB1	Q8ZRB1_SALTY	Glycoprotein/polysaccharide metabolism OS=Salmonella typhimurium (strain LT2 / SGSC1412 / ATCC 700720) GN=ybaY PE=4 SV=1	19465	9.3472	2470.41	3	54.4974	1.7356	39	7.1425	0.0961299
P28354	SYK1_SALTY	Lysine--tRNA ligase OS=Salmonella typhimurium (strain LT2 / SGSC1412 / ATCC 700720) GN=lysS PE=3 SV=3	57539	4.8955	588.551	24	50.297	6.8769	124	9.9514	0.0958158
P22036	ATMB_SALTY	Magnesium-transporting ATPase, P-type 1 OS=Salmonella typhimurium (strain LT2 / SGSC1412 / ATCC 700720) GN=mgtB PE=1 SV=3	100322	6.3779	894.835	24	26.3216	5.3054	135	8.7801	0.0952478
P58696	SYN_SALTY	Asparagine--tRNA ligase OS=Salmonella typhimurium (strain LT2 / SGSC1412 / ATCC 700720) GN=asnS PE=3 SV=2	52490	4.9468	881.146	13	35.1931	6.3185	81	8.5372	0.0951793
P40732	ARGD_SALTY	Acetylornithine/succinyldiaminopimelate aminotransferase OS=Salmonella typhimurium (strain LT2 / SGSC1412 / ATCC 700720) GN=argD PE=1 SV=3	43642	5.9121	521.941	5	23.4568	0.9714	38	8.0973	0.0947566
P63343	FTSH_SALTY	ATP-dependent zinc metalloprotease FtsH OS=Salmonella typhimurium (strain LT2 / SGSC1412 / ATCC 700720) GN=ftsH PE=3 SV=1	70784	5.7246	666.828	19	26.5528	7.7224	102	10.4268	0.092984
P65889	PUR7_SALTY	Phosphoribosylaminoimidazole-succinocarboxamide synthase OS=Salmonella typhimurium (strain LT2 / SGSC1412 / ATCC 700720) GN=purC PE=3 SV=1	26890	5.02	1577.08	9	40.0844	2.8812	53	7.1456	0.0927768
O30911	HSLU_SALTY	ATP-dependent protease ATPase subunit HslU OS=Salmonella typhimurium (strain LT2 / SGSC1412 / ATCC 700720) GN=hslU PE=3 SV=2	49637	5.2515	1191.3	18	36.1174	3.6078	96	7.838	0.0924745
Q8ZL96	SYGB_SALTY	Glycine--tRNA ligase beta subunit OS=Salmonella typhimurium (strain LT2 / SGSC1412 / ATCC 700720) GN=glyS PE=3 SV=3	76405	5.3555	737.903	21	37.881	5.7018	124	9.4206	0.0922589
P68684	RS21_SALTY	30S ribosomal protein S21 OS=Salmonella typhimurium (strain LT2 / SGSC1412 / ATCC 700720) GN=rpsU PE=3 SV=2	8494	11.5649	8986.66	16	43.662	2.2696	53	6.569	0.0921503
Q8ZNA5	FADL_SALTY	Long-chain fatty acid transport protein OS=Salmonella typhimurium (strain LT2 / SGSC1412 / ATCC 700720) GN=fadL PE=3 SV=2	47445	4.7183	1181.23	6	24.3678	3.6178	45	7.9782	0.0918179
Q8ZRD3	NUSB_SALTY	N utilization substance protein B homolog OS=Salmonella typhimurium (strain LT2 / SGSC1412 / ATCC 700720) GN=nusB PE=3 SV=1	15679	7.1689	1222.46	5	43.8849	3.8825	25	7.5934	0.0917978
P23905	DGAL_SALTY	D-galactose-binding periplasmic protein OS=Salmonella typhimurium (strain LT2 / SGSC1412 / ATCC 700720) GN=mglB PE=1 SV=2	35791	5.7495	1570.6	13	55.7229	5.1326	90	9.4054	0.0910143
Q8ZPG1	Q8ZPG1_SALTY	S-adenosylmethionine:tRNA ribosyltransferase-isomerase OS=Salmonella typhimurium (strain LT2 / SGSC1412 / ATCC 700720) GN=STM1548 PE=4 SV=1	39530	6.3281	525.295	10	31.2139	1.6848	53	8.6031	0.0908957
P69936	YDFG_SALTY	NADP-dependent L-serine/L-allo-threonine dehydrogenase YdfG OS=Salmonella typhimurium (strain LT2 / SGSC1412 / ATCC 700720) GN=ydfG PE=3 SV=1	27025	5.7832	1320.38	11	68.5484	4.0441	81	9.2314	0.0907888
Q8ZL67	MTLD_SALTY	Mannitol-1-phosphate 5-dehydrogenase OS=Salmonella typhimurium (strain LT2 / SGSC1412 / ATCC 700720) GN=mtlD PE=3 SV=1	40874	5.5034	1100.68	9	38.2199	7.9636	68	10.2509	0.0905231
Q7CQW0	Q7CQW0_SALTY	Glutamine high-affinity transporter OS=Salmonella typhimurium (strain LT2 / SGSC1412 / ATCC 700720) GN=glnH PE=3 SV=1	27245	9.0088	877.568	6	36.6936	6.3485	49	8.1141	0.0904162
P25081	MANA_SALTY	Mannose-6-phosphate isomerase OS=Salmonella typhimurium (strain LT2 / SGSC1412 / ATCC 700720) GN=manA PE=1 SV=2	42564	5.3643	654.601	12	39.6419	3.8591	80	9.1988	0.0902191
Q8ZPV0	ASTD_SALTY	N-succinylglutamate 5-semialdehyde dehydrogenase OS=Salmonella typhimurium (strain LT2 / SGSC1412 / ATCC 700720) GN=astD PE=2 SV=1	52984	6.6636	100.298	4	17.8862	5.3449	22	13.4902	0.0901405
P67286	YBJQ_SALTY	UPF0145 protein YbjQ OS=Salmonella typhimurium (strain LT2 / SGSC1412 / ATCC 700720) GN=ybjQ PE=3 SV=1	11429	4.7227	606.192	7	58.8785	5.8583	39	9.3645	0.089788
Q8ZQL1	Q8ZQL1_SALTY	D-alanyl-D-alanine carboxypeptidase penicillin-binding protein 6a OS=Salmonella typhimurium (strain LT2 / SGSC1412 / ATCC 700720) GN=dacC PE=3 SV=1	43636	8.8843	380.666	12	37.75	3.5423	60	9.2	0.0892501
Q8ZJU9	Q8ZJU9_SALTY	Putative transport protein OS=Salmonella typhimurium (strain LT2 / SGSC1412 / ATCC 700720) GN=yjjK PE=3 SV=1	62271	5.3569	448.818	20	39.6396	8.624	93	10.4323	0.0879854
P67091	USPF_SALTY	Universal stress protein F OS=Salmonella typhimurium (strain LT2 / SGSC1412 / ATCC 700720) GN=uspF PE=1 SV=1	15704	5.9209	1453.71	3	16.6667	1.4261	21	7.154	0.0877014
Q8ZRP0	BAMA_SALTY	Outer membrane protein assembly factor BamA OS=Salmonella typhimurium (strain LT2 / SGSC1412 / ATCC 700720) GN=bamA PE=3 SV=1	89471	4.8032	944.442	24	36.5672	5.3532	168	9.8435	0.0870933
P37432	OMPF_SALTY	Outer membrane protein F OS=Salmonella typhimurium (strain LT2 / SGSC1412 / ATCC 700720) GN=ompF PE=1 SV=2	40023	4.5322	586.97	12	34.9862	2.3122	58	9.6898	0.0869563
P64281	GREA_SALTY	Transcription elongation factor GreA OS=Salmonella typhimurium (strain LT2 / SGSC1412 / ATCC 700720) GN=greA PE=3 SV=1	17645	4.5498	1224.39	9	39.8734	3.9348	55	9.1226	0.0868577
Q8ZQX1	FLAV_SALTY	Flavodoxin-1 OS=Salmonella typhimurium (strain LT2 / SGSC1412 / ATCC 700720) GN=fldA PE=1 SV=3	19624	4.021	440.346	6	47.1591	7.5605	41	9.5385	0.0868042
P0A1V4	KAD_SALTY	Adenylate kinase OS=Salmonella typhimurium (strain LT2 / SGSC1412 / ATCC 700720) GN=adk PE=3 SV=1	23473	5.3921	1586.84	13	54.2056	2.1278	67	9.3268	0.0867792
H9L451	BAMB_SALTY	Outer membrane protein assembly factor BamB OS=Salmonella typhimurium (strain LT2 / SGSC1412 / ATCC 700720) GN=bamB PE=3 SV=1	41916	4.4619	592.918	9	29.0816	6.9941	75	9.5648	0.0864267
Q8ZLY2	Q8ZLY2_SALTY	Dihydroneopterin aldolase OS=Salmonella typhimurium (strain LT2 / SGSC1412 / ATCC 700720) GN=folB PE=4 SV=1	13415	4.5103	1904.68	4	35.8333	4.9243	26	8.2731	0.0863932
Q8ZPL1	Q8ZPL1_SALTY	Putative periplasmic protein OS=Salmonella typhimurium (strain LT2 / SGSC1412 / ATCC 700720) GN=ydgH PE=1 SV=1	33894	9.6563	1131.58	10	38.2166	2.2466	67	10.0074	0.08575
Q8ZN60	GUAA_SALTY	GMP synthase [glutamine-hydrolyzing] OS=Salmonella typhimurium (strain LT2 / SGSC1412 / ATCC 700720) GN=guaA PE=3 SV=1	58678	5.0771	459.415	9	24.381	6.8465	53	7.9515	0.0856231
Q7CR62	SYP_SALTY	Proline--tRNA ligase OS=Salmonella typhimurium (strain LT2 / SGSC1412 / ATCC 700720) GN=proS PE=3 SV=1	63499	5.0098	795.906	15	34.0909	4.165	92	8.3686	0.084751
P26983	HPF_SALTY	Ribosome hibernation promoting factor OS=Salmonella typhimurium (strain LT2 / SGSC1412 / ATCC 700720) GN=hpf PE=3 SV=1	10850	6.7163	935.52	4	16.8421	0.8782	16	4.8463	0.0846875
P10368	HIS7_SALTY	Histidine biosynthesis bifunctional protein HisB OS=Salmonella typhimurium (strain LT2 / SGSC1412 / ATCC 700720) GN=hisB PE=3 SV=2	40157	5.7847	758.388	9	39.1549	11.4211	46	10.3107	0.0844285
Q7CQY3	Q7CQY3_SALTY	Transcriptional repressor of iron-responsive genes (Fur family) (Ferric uptake regulator) OS=Salmonella typhimurium (strain LT2 / SGSC1412 / ATCC 700720) GN=fur PE=4 SV=1	17000	5.5166	1854.43	3	30	1.7052	29	6.7863	0.083772
Q8ZLQ2	Q8ZLQ2_SALTY	Putative periplasmic protein OS=Salmonella typhimurium (strain LT2 / SGSC1412 / ATCC 700720) GN=yhcB PE=4 SV=1	15263	5.5444	1908.75	8	58.9552	3.0597	53	9.4227	0.0837018
P0A1A5	ILVE_SALTY	Branched-chain-amino-acid aminotransferase OS=Salmonella typhimurium (strain LT2 / SGSC1412 / ATCC 700720) GN=ilvE PE=1 SV=2	34031	5.4712	658.387	6	32.6861	8.7693	43	12.2278	0.0831739
Q8ZKM4	Q8ZKM4_SALTY	Putative pyruvate formate lyase II OS=Salmonella typhimurium (strain LT2 / SGSC1412 / ATCC 700720) GN=pflD PE=4 SV=1	85932	5.6924	87.588	17	34.1176	11.0661	73	11.3109	0.0831238
P06202	OPPA_SALTY	Periplasmic oligopeptide-binding protein OS=Salmonella typhimurium (strain LT2 / SGSC1412 / ATCC 700720) GN=oppA PE=1 SV=2	61254	6.0352	519.475	15	31.3076	5.7231	85	9.3826	0.0822032
P67563	SYS_SALTY	Serine--tRNA ligase OS=Salmonella typhimurium (strain LT2 / SGSC1412 / ATCC 700720) GN=serS PE=3 SV=1	48549	5.2515	892.955	13	32.093	3.9889	71	8.9544	0.0821147
Q8ZPT3	Q8ZPT3_SALTY	Putative outer membrane protein OS=Salmonella typhimurium (strain LT2 / SGSC1412 / ATCC 700720) GN=STM1328 PE=1 SV=1	34818	5.8521	399.554	5	21.6301	5.8618	39	8.7186	0.0815717
P63411	ACKA_SALTY	Acetate kinase OS=Salmonella typhimurium (strain LT2 / SGSC1412 / ATCC 700720) GN=ackA PE=1 SV=1	43230	5.9106	980.305	8	32.5	5.8654	55	10.4501	0.0809786
Q8ZPC9	ABDH_SALTY	Gamma-aminobutyraldehyde dehydrogenase OS=Salmonella typhimurium (strain LT2 / SGSC1412 / ATCC 700720) GN=prr PE=3 SV=2	51159	5.4976	696.127	10	29.1139	6.2864	68	8.4284	0.0808216
Q8ZNL5	Q8ZNL5_SALTY	Putative esterase OS=Salmonella typhimurium (strain LT2 / SGSC1412 / ATCC 700720) GN=yeiG PE=4 SV=1	26991	4.6187	674.515	2	12.6531	0.8328	25	11.2905	0.0801299
P65748	IPYR_SALTY	Inorganic pyrophosphatase OS=Salmonella typhimurium (strain LT2 / SGSC1412 / ATCC 700720) GN=ppa PE=3 SV=2	19664	4.8369	1505.3	15	40.3409	5.5731	60	7.9654	0.0796939
Q8ZLI7	NFUA_SALTY	Fe/S biogenesis protein NfuA OS=Salmonella typhimurium (strain LT2 / SGSC1412 / ATCC 700720) GN=nfuA PE=3 SV=1	20924	4.3271	1938.26	4	27.2251	3.0476	35	8.9864	0.0792244
Q7CQG2	Q7CQG2_SALTY	Putative oxoacyl-(Acyl carrier protein) reductase OS=Salmonella typhimurium (strain LT2 / SGSC1412 / ATCC 700720) GN=yciK PE=1 SV=1	28055	7.2788	240.026	7	32.0158	6.8222	34	11.1327	0.0792044
Q8ZRB9	Q8ZRB9_SALTY	Lon protease OS=Salmonella typhimurium (strain LT2 / SGSC1412 / ATCC 700720) GN=lon PE=2 SV=1	87355	5.959	586.619	29	37.2449	5.9752	141	9.9717	0.0791944
Q8ZP91	Q8ZP91_SALTY	NAD-dependent fermentative D-lactate dehydrogenase OS=Salmonella typhimurium (strain LT2 / SGSC1412 / ATCC 700720) GN=ldhA PE=3 SV=1	36393	5.4229	291.201	6	19.4529	5.6123	37	8.0399	0.0790189
Q7CPC8	Q7CPC8_SALTY	Putative enzyme OS=Salmonella typhimurium (strain LT2 / SGSC1412 / ATCC 700720) GN=yihX PE=4 SV=1	22707	5.3027	2619.82	14	46.2312	1.8449	53	7.0888	0.0789889
Q8ZRB8	Q8ZRB8_SALTY	Peptidylprolyl isomerase OS=Salmonella typhimurium (strain LT2 / SGSC1412 / ATCC 700720) GN=cypD PE=4 SV=1	68087	4.8647	650.169	22	45.2648	4.66	129	8.896	0.0788218
P14845	CARA_SALTY	Carbamoyl-phosphate synthase small chain OS=Salmonella typhimurium (strain LT2 / SGSC1412 / ATCC 700720) GN=carA PE=3 SV=2	41625	6.0015	366.216	11	30.8901	9.4593	55	11.4107	0.0786464
P26398	RFBH_SALTY	Lipopolysaccharide biosynthesis protein RfbH OS=Salmonella typhimurium (strain LT2 / SGSC1412 / ATCC 700720) GN=rfbH PE=3 SV=1	48073	5.1079	435.412	11	24.2563	2.8067	49	8.3341	0.0785094
P0A1C3	ACCA_SALTY	Acetyl-coenzyme A carboxylase carboxyl transferase subunit alpha OS=Salmonella typhimurium (strain LT2 / SGSC1412 / ATCC 700720) GN=accA PE=3 SV=2	35321	5.2119	1375.85	11	49.8433	4.2686	64	9.7135	0.0781853
Q8ZN71	DAPA_SALTY	4-hydroxy-tetrahydrodipicolinate synthase OS=Salmonella typhimurium (strain LT2 / SGSC1412 / ATCC 700720) GN=dapA PE=1 SV=1	31274	5.6133	1104.08	7	33.5616	7.595	56	7.6495	0.0778512
P27237	OPDA_SALTY	Oligopeptidase A OS=Salmonella typhimurium (strain LT2 / SGSC1412 / ATCC 700720) GN=prlC PE=1 SV=1	76895	4.9395	247.137	19	27.7941	8.6191	72	10.3962	0.0778328
Q8ZQX7	NAGB_SALTY	Glucosamine-6-phosphate deaminase OS=Salmonella typhimurium (strain LT2 / SGSC1412 / ATCC 700720) GN=nagB PE=3 SV=1	29613	6.375	483.923	6	31.9549	2.0531	38	10.9297	0.0771077
Q7CQ23	Q7CQ23_SALTY	Thioredoxin dependent thiol peroxidase OS=Salmonella typhimurium (strain LT2 / SGSC1412 / ATCC 700720) GN=bcp PE=4 SV=1	17597	5.001	2569.81	9	61.5385	5.3905	47	8.3481	0.0768521
Q7CR66	ERPA_SALTY	Iron-sulfur cluster insertion protein ErpA OS=Salmonella typhimurium (strain LT2 / SGSC1412 / ATCC 700720) GN=erpA PE=3 SV=2	12091	3.9316	792.344	3	26.3158	1.1999	15	8.6102	0.0768371
P67270	GCH1L_SALTY	GTP cyclohydrolase 1 type 2 homolog OS=Salmonella typhimurium (strain LT2 / SGSC1412 / ATCC 700720) GN=ybgI PE=3 SV=1	26928	5.2441	2240.42	5	27.9352	8.8726	42	7.9869	0.0765881
Q8ZLD7	USPA_SALTY	Universal stress protein A OS=Salmonella typhimurium (strain LT2 / SGSC1412 / ATCC 700720) GN=uspA PE=3 SV=3	16070	4.9219	953.519	3	43.75	2.8986	16	11.8071	0.0765297
P0A2S0	LRP_SALTY	Leucine-responsive regulatory protein OS=Salmonella typhimurium (strain LT2 / SGSC1412 / ATCC 700720) GN=lrp PE=3 SV=2	18845	9.1465	697.206	12	41.4634	3.0642	50	7.9965	0.0763826
Q9ZF31	IF2_SALTY	Translation initiation factor IF-2 OS=Salmonella typhimurium (strain LT2 / SGSC1412 / ATCC 700720) GN=infB PE=3 SV=2	97342	5.8286	835.092	26	38.3408	6.3431	137	10.1245	0.0751965
P74852	SSAJ_SALTY	Secretion system apparatus lipoprotein SsaJ OS=Salmonella typhimurium (strain LT2 / SGSC1412 / ATCC 700720) GN=ssaJ PE=3 SV=1	28502	8.168	783.232	10	50.6024	6.5658	72	10.4193	0.0751764
Q8ZKP7	TPIS_SALTY	Triosephosphate isomerase OS=Salmonella typhimurium (strain LT2 / SGSC1412 / ATCC 700720) GN=tpiA PE=3 SV=1	26899	5.6104	1093.17	9	40.7843	2.6401	42	8.6936	0.0745299
Q8ZLQ1	Q8ZLQ1_SALTY	Serine endoprotease OS=Salmonella typhimurium (strain LT2 / SGSC1412 / ATCC 700720) GN=degQ PE=4 SV=1	47297	7.6377	1313.27	10	32.967	4.623	65	7.4442	0.0744814
O68883	CISY_SALTY	Citrate synthase OS=Salmonella typhimurium (strain LT2 / SGSC1412 / ATCC 700720) GN=gltA PE=3 SV=1	48074	6.2578	380.089	9	26.4637	12.0403	41	10.5746	0.0744814
Q8ZRA6	Q8ZRA6_SALTY	Acridine efflux pump OS=Salmonella typhimurium (strain LT2 / SGSC1412 / ATCC 700720) GN=acrA PE=4 SV=1	42209	8.8447	485.412	11	25.9446	7.0034	69	11.2023	0.0743929
Q7CPR9	HLDE_SALTY	Bifunctional protein HldE OS=Salmonella typhimurium (strain LT2 / SGSC1412 / ATCC 700720) GN=hldE PE=3 SV=1	51092	4.8779	282.466	10	30.1887	2.5528	43	9.6407	0.0740404
Q8ZLR6	Q8ZLR6_SALTY	Sigma cross-reacting protein 27A (SCRP-27A) OS=Salmonella typhimurium (strain LT2 / SGSC1412 / ATCC 700720) GN=yhbL PE=4 SV=1	22888	4.4209	1301.55	4	40.0922	6.7506	32	10.042	0.0732368
Q8ZPL8	Q8ZPL8_SALTY	Putative periplasmic protein OS=Salmonella typhimurium (strain LT2 / SGSC1412 / ATCC 700720) GN=ydgA PE=4 SV=1	54250	5.0229	1148.92	11	32.2709	6.6066	75	8.6061	0.0728041
Q7CPP3	Q7CPP3_SALTY	Putative ABC superfamily transport protein OS=Salmonella typhimurium (strain LT2 / SGSC1412 / ATCC 700720) GN=yrbC PE=4 SV=1	23989	9.4292	2011.92	8	30.8057	7.1433	47	8.9562	0.0725201
Q8ZKY4	YIDC_SALTY	Membrane protein insertase YidC OS=Salmonella typhimurium (strain LT2 / SGSC1412 / ATCC 700720) GN=yidC PE=3 SV=1	61594	8.6147	290.03	10	29.927	3.079	50	8.5517	0.0724917
P0A2E1	GLYA_SALTY	Serine hydroxymethyltransferase OS=Salmonella typhimurium (strain LT2 / SGSC1412 / ATCC 700720) GN=glyA PE=1 SV=1	45426	6.019	512.86	14	34.2926	2.922	69	10.5209	0.0713439
Q8ZP10	Q8ZP10_SALTY	Site-determining protein OS=Salmonella typhimurium (strain LT2 / SGSC1412 / ATCC 700720) GN=minD PE=3 SV=1	29481	5.1709	658.789	7	30.7407	8.9231	42	8.9928	0.0708845
Q8XG72	Q8XG72_SALTY	Arginine transport system OS=Salmonella typhimurium (strain LT2 / SGSC1412 / ATCC 700720) GN=artI PE=3 SV=1	26979	8.1299	1288.3	18	66.6667	6.5326	83	10.3433	0.0708544
Q8ZL72	Q8ZL72_SALTY	Aldehyde dehydrogenase B OS=Salmonella typhimurium (strain LT2 / SGSC1412 / ATCC 700720) GN=aldB PE=3 SV=1	56290	5.2339	705.263	7	21.6797	5.5416	49	8.6118	0.0707575
Q7CR26	Q7CR26_SALTY	Cytochrome o ubiquinol oxidase subunit II OS=Salmonella typhimurium (strain LT2 / SGSC1412 / ATCC 700720) GN=cyoA PE=4 SV=1	35269	8.8286	810.68	6	16.0377	2.8508	50	9.7091	0.0705019
P0A2T6	CRP_SALTY	cAMP-activated global transcriptional regulator CRP OS=Salmonella typhimurium (strain LT2 / SGSC1412 / ATCC 700720) GN=crp PE=1 SV=1	23641	8.436	937.005	10	47.1429	8.5617	51	7.6069	0.0704134
P0A7P2	RL33_SALTY	50S ribosomal protein L33 OS=Salmonella typhimurium (strain LT2 / SGSC1412 / ATCC 700720) GN=rpmG PE=3 SV=2	6367	10.7021	1155.43	4	40	0.8915	15	6.3773	0.0702964
Q8ZMN0	Q8ZMN0_SALTY	TonB-dependent siderophore receptor protein OS=Salmonella typhimurium (strain LT2 / SGSC1412 / ATCC 700720) GN=iroN PE=3 SV=1	79352	5.7905	374.75	21	44.4904	6.8847	110	10.4318	0.0702463
Q7CPQ3	Q7CPQ3_SALTY	Putative ABC superfamily transport protein OS=Salmonella typhimurium (strain LT2 / SGSC1412 / ATCC 700720) GN=yhbS PE=4 SV=1	18530	4.2671	830.466	2	14.9701	6.9436	13	8.9205	0.070238
O85140	FABD_SALTY	Malonyl CoA-acyl carrier protein transacylase OS=Salmonella typhimurium (strain LT2 / SGSC1412 / ATCC 700720) GN=fabD PE=1 SV=3	32384	4.9336	355.608	4	21.6828	4.2402	31	9.2306	0.0699239
Q7CP63	Q7CP63_SALTY	Response regulator (OmpR family) in two-component regulatory system with ArcB (Or CpxA) OS=Salmonella typhimurium (strain LT2 / SGSC1412 / ATCC 700720) GN=arcA PE=4 SV=1	27273	5.1196	744.305	14	33.6134	5.6547	63	11.5704	0.0695413
P0A2A5	RL28_SALTY	50S ribosomal protein L28 OS=Salmonella typhimurium (strain LT2 / SGSC1412 / ATCC 700720) GN=rpmB PE=3 SV=2	9044	11.8315	1767.39	11	23.0769	1.6516	29	8.299	0.0695129
P67912	HLDD_SALTY	ADP-L-glycero-D-manno-heptose-6-epimerase OS=Salmonella typhimurium (strain LT2 / SGSC1412 / ATCC 700720) GN=hldD PE=3 SV=1	34827	4.7212	1001.14	17	56.4516	3.5679	98	9.8523	0.0693659
P00499	HIS1_SALTY	ATP phosphoribosyltransferase OS=Salmonella typhimurium (strain LT2 / SGSC1412 / ATCC 700720) GN=hisG PE=1 SV=1	33190	5.3071	2657.56	6	34.7826	1.8229	54	6.9598	0.0693157
Q8ZML9	Q8ZML9_SALTY	Putative LysM domain protein OS=Salmonella typhimurium (strain LT2 / SGSC1412 / ATCC 700720) GN=ygaU PE=4 SV=1	16111	5.2471	536.16	5	44.2953	0.4159	27	11.3742	0.0687828
Q8ZJZ3	Q8ZJZ3_SALTY	Putative NAD-dependent aldehyde dehydrogenase OS=Salmonella typhimurium (strain LT2 / SGSC1412 / ATCC 700720) GN=STM4519 PE=3 SV=1	50006	5.8169	281.681	10	22.1491	7.789	49	8.577	0.0686107
Q7CQT1	Q7CQT1_SALTY	Putative cytoplasmic protein OS=Salmonella typhimurium (strain LT2 / SGSC1412 / ATCC 700720) GN=STM1078 PE=4 SV=1	14898	5.7246	910.512	6	42.029	7.8768	32	9.606	0.0681296
Q7CQI9	Q7CQI9_SALTY	Alcohol dehydrogenase OS=Salmonella typhimurium (strain LT2 / SGSC1412 / ATCC 700720) GN=adhP PE=3 SV=1	35518	5.748	1122.78	12	40.1786	4.0232	83	9.2917	0.0675031
Q8ZPL0	Q8ZPL0_SALTY	NAD(P) transhydrogenase subunit alpha OS=Salmonella typhimurium (strain LT2 / SGSC1412 / ATCC 700720) GN=pntA PE=3 SV=1	54231	5.499	485.555	13	39.0963	10.7784	77	10.9456	0.0669835
P26353	HMP_SALTY	Flavohemoprotein OS=Salmonella typhimurium (strain LT2 / SGSC1412 / ATCC 700720) GN=hmp PE=2 SV=3	43964	5.5781	237.183	8	18.4343	6.1355	42	9.3853	0.066915
Q8ZRS0	Q8ZRS0_SALTY	Carbonic anhydrase OS=Salmonella typhimurium (strain LT2 / SGSC1412 / ATCC 700720) GN=yadF PE=1 SV=1	24805	5.6045	317.951	5	34.0909	5.5775	25	10.5769	0.066489
Q7CR64	YAEH_SALTY	UPF0325 protein YaeH OS=Salmonella typhimurium (strain LT2 / SGSC1412 / ATCC 700720) GN=yaeH PE=3 SV=1	15084	7.1719	1986.72	9	61.7188	7.3071	55	8.9319	0.0662384
P0A2K7	GALF_SALTY	UTP--glucose-1-phosphate uridylyltransferase OS=Salmonella typhimurium (strain LT2 / SGSC1412 / ATCC 700720) GN=galF PE=3 SV=1	32937	5.5605	105.226	7	23.9057	4.5742	27	12.9611	0.0661649
P0A1F8	DHAS_SALTY	Aspartate-semialdehyde dehydrogenase OS=Salmonella typhimurium (strain LT2 / SGSC1412 / ATCC 700720) GN=asd PE=1 SV=1	40110	5.2119	581.984	7	36.9565	6.0337	39	11.3257	0.0659343
Q7CQK3	Q7CQK3_SALTY	NAD(P) transhydrogenase subunit beta OS=Salmonella typhimurium (strain LT2 / SGSC1412 / ATCC 700720) GN=pntB PE=3 SV=1	48837	5.6396	300.387	6	19.4805	2.4243	38	11.2335	0.0657689
P0A1F6	UDP_SALTY	Uridine phosphorylase OS=Salmonella typhimurium (strain LT2 / SGSC1412 / ATCC 700720) GN=udp PE=1 SV=2	27121	6.0835	1073.57	6	45.8498	4.4977	42	10.8267	0.0654064
P96062	PHNS_SALTY	Putative 2-aminoethylphosphonate-binding periplasmic protein OS=Salmonella typhimurium (strain LT2 / SGSC1412 / ATCC 700720) GN=phnS PE=1 SV=1	36524	6.1274	711.479	13	43.3234	6.71	66	9.7038	0.0653463
P33321	IF3_SALTY	Translation initiation factor IF-3 OS=Salmonella typhimurium (strain LT2 / SGSC1412 / ATCC 700720) GN=infC PE=3 SV=1	20581	9.9785	1102.53	7	33.8889	10.3066	38	9.8703	0.0652393
Q8ZP20	TREA_SALTY	Periplasmic trehalase OS=Salmonella typhimurium (strain LT2 / SGSC1412 / ATCC 700720) GN=treA PE=3 SV=1	63469	5.1519	509.391	13	32.807	6.3103	73	9.8628	0.0650522
P35672	INVG_SALTY	Protein InvG OS=Salmonella typhimurium (strain LT2 / SGSC1412 / ATCC 700720) GN=invG PE=1 SV=3	61727	8.9033	74.5567	13	27.5801	12.7253	47	12.1062	0.0648668
Q7CPM0	Q7CPM0_SALTY	Acetyl CoA carboxylase OS=Salmonella typhimurium (strain LT2 / SGSC1412 / ATCC 700720) GN=accC PE=4 SV=1	49231	6.542	532.142	14	38.0846	7.2174	86	9.3505	0.0644658
P58661	AAT_SALTY	Aspartate aminotransferase OS=Salmonella typhimurium (strain LT2 / SGSC1412 / ATCC 700720) GN=aspC PE=3 SV=1	43494	5.2939	445.386	16	43.6869	7.3303	85	10.6219	0.0637792
P0A2A7	RL30_SALTY	50S ribosomal protein L30 OS=Salmonella typhimurium (strain LT2 / SGSC1412 / ATCC 700720) GN=rpmD PE=3 SV=2	6509	11.4155	1590.4	8	57.6271	0.991	23	4.1357	0.0635336
Q8ZR41	GCS2_SALTY	Putative glutamate--cysteine ligase 2 OS=Salmonella typhimurium (strain LT2 / SGSC1412 / ATCC 700720) GN=ybdK PE=1 SV=1	41570	5.3906	109.003	7	21.5054	10.3589	31	12.0714	0.0623391
P60817	YFBU_SALTY	UPF0304 protein YfbU OS=Salmonella typhimurium (strain LT2 / SGSC1412 / ATCC 700720) GN=yfbU PE=3 SV=1	19511	6.0703	754.666	10	73.1707	6.7244	57	11.5812	0.062299
Q9L6M9	DLHH_SALTY	Putative carboxymethylenebutenolidase OS=Salmonella typhimurium (strain LT2 / SGSC1412 / ATCC 700720) GN=ysgA PE=3 SV=1	29043	5.5869	390.489	6	43.3333	6.4772	39	11.7386	0.0622889
P0A9X6	MREB_SALTY	Rod shape-determining protein MreB OS=Salmonella typhimurium (strain LT2 / SGSC1412 / ATCC 700720) GN=mreB PE=3 SV=1	36929	4.9951	390.43	7	24.7839	1.7635	42	8.6126	0.0622706
Q8ZNU1	Q8ZNU1_SALTY	Putative cell wall-associated hydrolase OS=Salmonella typhimurium (strain LT2 / SGSC1412 / ATCC 700720) GN=STM1940 PE=4 SV=1	54344	9.353	523.661	11	34.8643	4.8749	60	10.8718	0.0620734
Q8ZS17	YAAA_SALTY	UPF0246 protein YaaA OS=Salmonella typhimurium (strain LT2 / SGSC1412 / ATCC 700720) GN=yaaA PE=3 SV=1	29745	5.8374	403.552	9	50.9728	7.2613	44	9.7594	0.0615438
P64222	GCST_SALTY	Aminomethyltransferase OS=Salmonella typhimurium (strain LT2 / SGSC1412 / ATCC 700720) GN=gcvT PE=3 SV=1	40191	5.2075	533.319	9	30.4945	9.2946	52	11.1639	0.0614319
Q8ZPV9	Q8ZPV9_SALTY	Putative enzyme related to aldose 1-epimerase OS=Salmonella typhimurium (strain LT2 / SGSC1412 / ATCC 700720) GN=yeaD PE=1 SV=1	32539	5.6763	419.199	5	27.8912	6.1296	25	10.7618	0.0611963
O33921	AGP_SALTY	Glucose-1-phosphatase OS=Salmonella typhimurium (strain LT2 / SGSC1412 / ATCC 700720) GN=agp PE=3 SV=2	45530	6.646	342.573	8	21.3075	6.1496	40	7.9401	0.0610744
Q8ZRQ2	Q8ZRQ2_SALTY	Outer membrane protein receptor / transporter for ferrichrome, colicin M, and phages T1, T5, and phi80 OS=Salmonella typhimurium (strain LT2 / SGSC1412 / ATCC 700720) GN=fhuA PE=3 SV=1	80576	5.1284	506.187	17	33.059	2.6742	109	10.49	0.0610259
Q7CPI1	Q7CPI1_SALTY	PTS family, mannitol-specific enzyme IIABC components OS=Salmonella typhimurium (strain LT2 / SGSC1412 / ATCC 700720) GN=mtlA PE=4 SV=1	68120	5.8843	444.887	14	27.7429	3.4638	84	9.2999	0.0609858
Q7CR61	Q7CR61_SALTY	Outer membrane lipoprotein RcsF OS=Salmonella typhimurium (strain LT2 / SGSC1412 / ATCC 700720) GN=rcsF PE=3 SV=1	14180	9.1421	635.931	2	20.8955	0.719	18	9.4753	0.0602557
Q8ZRC1	Q8ZRC1_SALTY	Putative lipoprotein OS=Salmonella typhimurium (strain LT2 / SGSC1412 / ATCC 700720) GN=yajG PE=4 SV=1	22795	8.5562	269.123	4	20.4762	1.265	22	7.987	0.0600937
Q8ZPM0	Q8ZPM0_SALTY	Putative oxidoreductase OS=Salmonella typhimurium (strain LT2 / SGSC1412 / ATCC 700720) GN=ydgJ PE=4 SV=1	41211	6.3398	566.001	9	23.9892	4.641	48	9.7278	0.0596242
Q7CPC7	Q7CPC7_SALTY	Putative acetyltransferase OS=Salmonella typhimurium (strain LT2 / SGSC1412 / ATCC 700720) GN=yiiD PE=4 SV=1	36893	6.0688	774.888	6	22.7964	4.6132	38	7.9007	0.0593102
Q8ZPC8	Q8ZPC8_SALTY	Putative gntR family regulatory protein OS=Salmonella typhimurium (strain LT2 / SGSC1412 / ATCC 700720) GN=ydcR PE=4 SV=1	53138	8.5898	305.863	8	21.73	4.8458	51	8.8476	0.0591832
Q8ZQE0	Q8ZQE0_SALTY	Homolog of slsA in STM OS=Salmonella typhimurium (strain LT2 / SGSC1412 / ATCC 700720) GN=STM0950 PE=4 SV=1	24149	5.231	622.248	3	22.2222	3.5409	31	9.076	0.0591247
P65977	RECA_SALTY	Protein RecA OS=Salmonella typhimurium (strain LT2 / SGSC1412 / ATCC 700720) GN=recA PE=1 SV=2	37920	4.8882	399.321	11	44.4759	4.9331	54	8.6339	0.058418
Q7CQF9	Q7CQF9_SALTY	Putative cytoplasmic protein OS=Salmonella typhimurium (strain LT2 / SGSC1412 / ATCC 700720) GN=yciF PE=4 SV=1	18640	5.0684	288.345	5	42.515	4.3133	26	9.0092	0.0580856
Q8ZLD4	Q8ZLD4_SALTY	Glutathione oxidoreductase OS=Salmonella typhimurium (strain LT2 / SGSC1412 / ATCC 700720) GN=gor PE=3 SV=1	48661	5.7319	111.219	7	28	9.0755	38	10.0289	0.0570564
Q8ZLA9	Q8ZLA9_SALTY	Dipeptide transport protein OS=Salmonella typhimurium (strain LT2 / SGSC1412 / ATCC 700720) GN=dppA PE=4 SV=1	60181	6.0425	283.253	8	21.6822	11.4231	37	10.3596	0.0569194
Q8ZJV7	DEOD_SALTY	Purine nucleoside phosphorylase DeoD-type OS=Salmonella typhimurium (strain LT2 / SGSC1412 / ATCC 700720) GN=deoD PE=3 SV=1	25961	5.4478	311.623	10	43.0962	6.8471	48	10.5958	0.0568743
Q8ZR02	Q8ZR02_SALTY	D-alanyl-D-alanine carboxypeptidase, penicillin-binding protein 5 OS=Salmonella typhimurium (strain LT2 / SGSC1412 / ATCC 700720) GN=dacA PE=3 SV=1	44428	8.8462	222.89	16	49.6278	7.7196	75	10.2897	0.0567139
P0A1P6	GLNA_SALTY	Glutamine synthetase OS=Salmonella typhimurium (strain LT2 / SGSC1412 / ATCC 700720) GN=glnA PE=1 SV=2	51752	5.2485	442.847	12	35.3945	5.507	57	10.1126	0.0566738
Q8ZNN4	SYM_SALTY	Methionine--tRNA ligase OS=Salmonella typhimurium (strain LT2 / SGSC1412 / ATCC 700720) GN=metG PE=3 SV=3	76225	5.2822	269.049	22	34.712	8.167	92	10.2739	0.0563314
Q8ZM69	Q8ZM69_SALTY	D-3-phosphoglycerate dehydrogenase OS=Salmonella typhimurium (strain LT2 / SGSC1412 / ATCC 700720) GN=serA PE=3 SV=1	43960	6.4248	723.552	14	38.2927	7.1717	80	8.7936	0.0563213
Q8ZP02	Q8ZP02_SALTY	Mannose-specific enzyme IID OS=Salmonella typhimurium (strain LT2 / SGSC1412 / ATCC 700720) GN=manZ PE=4 SV=1	31242	9.8672	754.879	6	22.028	5.2651	33	9.2895	0.0561743
P65933	PYRH_SALTY	Uridylate kinase OS=Salmonella typhimurium (strain LT2 / SGSC1412 / ATCC 700720) GN=pyrH PE=1 SV=1	25938	7.2568	929.366	6	32.7801	1.7676	38	8.7066	0.0561259
P63923	DEOB_SALTY	Phosphopentomutase OS=Salmonella typhimurium (strain LT2 / SGSC1412 / ATCC 700720) GN=deoB PE=3 SV=1	44216	4.9966	124.221	6	23.0958	9.9259	30	8.3081	0.0557132
Q8ZKI5	Q8ZKI5_SALTY	Aspartokinase OS=Salmonella typhimurium (strain LT2 / SGSC1412 / ATCC 700720) GN=lysC PE=3 SV=1	48594	4.856	259.029	10	30.5122	5.7857	43	10.2171	0.0553507
Q8ZR06	PAGP_SALTY	Lipid A palmitoyltransferase PagP OS=Salmonella typhimurium (strain LT2 / SGSC1412 / ATCC 700720) GN=pagP PE=1 SV=1	22184	7.6274	237.604	3	21.0526	3.3354	19	8.2759	0.0548311
Q7CQV7	Q7CQV7_SALTY	Putative periplasmic protein OS=Salmonella typhimurium (strain LT2 / SGSC1412 / ATCC 700720) GN=ybiS PE=4 SV=1	33271	5.7188	402.816	6	37.2549	1.428	44	9.3121	0.0541161
H9L427	H9L427_SALTY	GTP-binding elongation factor family protein OS=Salmonella typhimurium (strain LT2 / SGSC1412 / ATCC 700720) GN=typA PE=4 SV=1	67334	5.0244	248.78	11	18.6161	7.0739	54	8.7383	0.0540375
P41033	PCKA_SALTY	Phosphoenolpyruvate carboxykinase [ATP] OS=Salmonella typhimurium (strain LT2 / SGSC1412 / ATCC 700720) GN=pckA PE=3 SV=2	59539	5.5825	417.752	15	40.5204	7.271	76	11.8891	0.0539891
P65559	YFCD_SALTY	Uncharacterized Nudix hydrolase YfcD OS=Salmonella typhimurium (strain LT2 / SGSC1412 / ATCC 700720) GN=yfcD PE=3 SV=1	20893	4.4839	522.221	6	44.5652	5.6592	32	10.7242	0.053959
Q8ZNK2	Q8ZNK2_SALTY	Putative permease OS=Salmonella typhimurium (strain LT2 / SGSC1412 / ATCC 700720) GN=yeiU PE=4 SV=1	26904	10.0869	263.139	3	17.1548	9.3703	16	10.8803	0.0534795
Q8ZPZ6	Q8ZPZ6_SALTY	Adenylosuccinate lyase OS=Salmonella typhimurium (strain LT2 / SGSC1412 / ATCC 700720) GN=purB PE=1 SV=1	51514	5.9312	541.093	17	33.5526	5.7367	63	10.0954	0.053254
H9L479	H9L479_SALTY	Outer membrane N-acetyl phenylalanine beta-naphthyl ester-cleaving esterase OS=Salmonella typhimurium (strain LT2 / SGSC1412 / ATCC 700720) GN=apeE PE=4 SV=1	69818	5.2603	183.78	6	11.7378	6.1214	40	8.9951	0.0532239
P0CL07	GSA_SALTY	Glutamate-1-semialdehyde 2,1-aminomutase OS=Salmonella typhimurium (strain LT2 / SGSC1412 / ATCC 700720) GN=hemL PE=3 SV=1	45295	4.6201	407.539	8	26.5258	3.4009	51	11.4678	0.0531855
Q7CQF2	Q7CQF2_SALTY	UTP--glucose-1-phosphate uridylyltransferase OS=Salmonella typhimurium (strain LT2 / SGSC1412 / ATCC 700720) GN=galU PE=3 SV=1	32884	4.8853	447.12	4	24.1722	7.3984	23	9.969	0.0529349
Q8ZM06	DKGA_SALTY	2,5-diketo-D-gluconic acid reductase A OS=Salmonella typhimurium (strain LT2 / SGSC1412 / ATCC 700720) GN=dkgA PE=3 SV=1	30976	5.9897	670.995	7	41.0909	4.3131	48	8.9195	0.0527344
Q7CPT7	Q7CPT7_SALTY	Periplasmic L-asparaginase II OS=Salmonella typhimurium (strain LT2 / SGSC1412 / ATCC 700720) GN=ansB PE=3 SV=1	36903	5.7935	296.739	9	39.6552	8.3971	56	10.8437	0.0525874
Q8ZQT9	Q8ZQT9_SALTY	Cytochrome d terminal oxidase, polypeptide subunit I OS=Salmonella typhimurium (strain LT2 / SGSC1412 / ATCC 700720) GN=cydA PE=4 SV=1	58277	6.4482	211.998	7	12.069	1.9981	44	6.5083	0.0525473
Q7CQP3	Q7CQP3_SALTY	Transcriptional activator of ntrL protein OS=Salmonella typhimurium (strain LT2 / SGSC1412 / ATCC 700720) GN=osmE PE=4 SV=1	12153	7.0708	756.222	8	62.8319	3.9934	39	9.5811	0.0524989
Q7CQV2	Q7CQV2_SALTY	Arginine 3rd transport system OS=Salmonella typhimurium (strain LT2 / SGSC1412 / ATCC 700720) GN=artJ PE=3 SV=1	26682	8.5869	388.723	7	37.037	10.4641	40	11.1714	0.0523318
Q7CPH6	Q7CPH6_SALTY	Putative rhodanese-related sulfurtransferases OS=Salmonella typhimurium (strain LT2 / SGSC1412 / ATCC 700720) GN=yibN PE=4 SV=1	15654	9.8584	216.165	3	25.8741	4.4428	15	9.1212	0.0519208
P74861	TYRB_SALTY	Aromatic-amino-acid aminotransferase OS=Salmonella typhimurium (strain LT2 / SGSC1412 / ATCC 700720) GN=tyrB PE=3 SV=3	43499	5.3115	300.054	9	27.7078	6.9817	45	11.491	0.0517738
P0A8B8	YBAB_SALTY	Nucleoid-associated protein YbaB OS=Salmonella typhimurium (strain LT2 / SGSC1412 / ATCC 700720) GN=ybaB PE=3 SV=1	12006	4.8179	191.774	5	51.3761	5.2771	22	9.6472	0.0515683
Q9ZFV8	MAO2_SALTY	NADP-dependent malic enzyme OS=Salmonella typhimurium (strain LT2 / SGSC1412 / ATCC 700720) GN=maeB PE=3 SV=2	82269	5.4009	308.368	14	26.4822	9.0765	69	11.4403	0.0515483
Q9RF52	PEPB_SALTY	Peptidase B OS=Salmonella typhimurium (strain LT2 / SGSC1412 / ATCC 700720) GN=pepB PE=1 SV=1	46326	5.2412	73.48	11	31.6159	7.8775	48	11.5151	0.0514798
H9L426	H9L426_SALTY	Secretion system chaparone OS=Salmonella typhimurium (strain LT2 / SGSC1412 / ATCC 700720) GN=sscA PE=4 SV=1	18123	7.9995	518.717	5	26.1146	3.7145	26	7.9003	0.0512893
Q8ZK65	Q8ZK65_SALTY	Putative transcriptional regulator OS=Salmonella typhimurium (strain LT2 / SGSC1412 / ATCC 700720) GN=STM4417 PE=4 SV=1	30741	5.6543	274.5	6	31.0469	6.9986	30	10.7949	0.0510788
Q7CPK9	Q7CPK9_SALTY	Phosphoribulokinase OS=Salmonella typhimurium (strain LT2 / SGSC1412 / ATCC 700720) GN=prkB PE=3 SV=1	32391	6.1099	180.217	5	24.2215	6.0019	25	10.2333	0.0508232
Q8ZN83	TALA_SALTY	Transaldolase A OS=Salmonella typhimurium (strain LT2 / SGSC1412 / ATCC 700720) GN=talA PE=3 SV=1	35569	6.0146	433.753	13	44.3038	4.6093	64	10.7795	0.0505977
P77980	AROB_SALTY	3-dehydroquinate synthase OS=Salmonella typhimurium (strain LT2 / SGSC1412 / ATCC 700720) GN=aroB PE=3 SV=1	38685	5.3408	205.437	8	32.5967	3.1023	36	9.7783	0.0505091
P67651	RRAA_SALTY	Regulator of ribonuclease activity A OS=Salmonella typhimurium (strain LT2 / SGSC1412 / ATCC 700720) GN=rraA PE=3 SV=1	17363	3.8262	1107.87	6	39.7516	1.1346	32	7.393	0.0504122
Q8ZQU0	Q8ZQU0_SALTY	Succinyl-CoA ligase [ADP-forming] subunit alpha OS=Salmonella typhimurium (strain LT2 / SGSC1412 / ATCC 700720) GN=sucD PE=3 SV=1	29756	6.0835	298.465	7	24.9135	6.5349	34	8.4679	0.0503337
P0A261	TSX_SALTY	Nucleoside-specific channel-forming protein tsx OS=Salmonella typhimurium (strain LT2 / SGSC1412 / ATCC 700720) GN=tsx PE=3 SV=1	32757	4.7871	318.465	5	22.6481	4.9535	25	9.3469	0.0500196
Q8ZQ05	Q8ZQ05_SALTY	Respiratory NADH dehydrogenase 2 OS=Salmonella typhimurium (strain LT2 / SGSC1412 / ATCC 700720) GN=ndh PE=4 SV=1	47361	9.3633	135.387	13	43.0876	9.4251	59	12.0194	0.0496086
Q8ZL95	SYGA_SALTY	Glycine--tRNA ligase alpha subunit OS=Salmonella typhimurium (strain LT2 / SGSC1412 / ATCC 700720) GN=glyQ PE=3 SV=1	34724	4.7563	551.829	7	21.7822	6.7203	36	10.0965	0.0495401
P66692	RPIA_SALTY	Ribose-5-phosphate isomerase A OS=Salmonella typhimurium (strain LT2 / SGSC1412 / ATCC 700720) GN=rpiA PE=3 SV=1	22881	4.8955	935.034	4	17.8082	2.3331	35	7.8141	0.0487065
H9L4A3	H9L4A3_SALTY	Putative dioxygenase for synthesis of lipid OS=Salmonella typhimurium (strain LT2 / SGSC1412 / ATCC 700720) GN=lpxO PE=4 SV=1	34831	9.8496	163.921	8	34.4371	3.8259	38	9.2161	0.0486179
P0A2F2	NPD_SALTY	NAD-dependent protein deacylase OS=Salmonella typhimurium (strain LT2 / SGSC1412 / ATCC 700720) GN=cobB PE=1 SV=2	26223	5.3145	99.2461	3	11.4407	1.4601	15	11.8312	0.0480699
Q8ZQ14	Q8ZQ14_SALTY	3-oxoacyl-[acyl-carrier-protein] synthase 2 OS=Salmonella typhimurium (strain LT2 / SGSC1412 / ATCC 700720) GN=fabF PE=3 SV=1	42925	5.5225	156.473	6	27.3608	1.567	42	11.2626	0.0480014
P0A2F4	SODF_SALTY	Superoxide dismutase [Fe] OS=Salmonella typhimurium (strain LT2 / SGSC1412 / ATCC 700720) GN=sodB PE=3 SV=2	21294	5.5254	528.69	7	31.6062	2.8822	30	8.5875	0.0479329
Q8ZLQ6	NANA_SALTY	N-acetylneuraminate lyase OS=Salmonella typhimurium (strain LT2 / SGSC1412 / ATCC 700720) GN=nanA PE=3 SV=1	32434	5.4668	502.415	3	18.1818	10.6783	22	10.1532	0.0476723
Q8ZM09	Q8ZM09_SALTY	Putative oxidoreductase OS=Salmonella typhimurium (strain LT2 / SGSC1412 / ATCC 700720) GN=yghA PE=1 SV=1	31419	5.9707	410.258	7	36.7347	4.4805	38	9.2858	0.0473933
Q8ZN86	Q8ZN86_SALTY	Putative outer membrane lipoprotein OS=Salmonella typhimurium (strain LT2 / SGSC1412 / ATCC 700720) GN=STM2447 PE=4 SV=1	20527	4.6479	102.467	3	20.9424	2.2637	18	10.8221	0.0473048
Q8ZRF0	Q8ZRF0_SALTY	Pyrroline-5-carboxylate reductase OS=Salmonella typhimurium (strain LT2 / SGSC1412 / ATCC 700720) GN=proC PE=3 SV=1	28043	6.1055	522.553	5	28.9963	10.263	28	9.2711	0.0472948
O68901	SODC_SALTY	Superoxide dismutase [Cu-Zn] 2 OS=Salmonella typhimurium (strain LT2 / SGSC1412 / ATCC 700720) GN=sodC PE=3 SV=1	17726	6.0439	440.949	5	39.3064	1.3786	19	10.4835	0.0471427
Q8ZP60	Q8ZP60_SALTY	Phage shock protein OS=Salmonella typhimurium (strain LT2 / SGSC1412 / ATCC 700720) GN=pspA PE=4 SV=1	25508	5.2002	520.34	9	42.3423	6.1236	53	11.3081	0.0468253
Q8ZL68	Q8ZL68_SALTY	Putative glutathione S-transferase OS=Salmonella typhimurium (strain LT2 / SGSC1412 / ATCC 700720) GN=yibF PE=3 SV=1	22559	5.1943	672.042	7	30.6931	4.4557	41	8.5368	0.0465212
P26978	PUR9_SALTY	Bifunctional purine biosynthesis protein PurH OS=Salmonella typhimurium (strain LT2 / SGSC1412 / ATCC 700720) GN=purH PE=3 SV=2	57431	5.4814	506.282	11	26.6541	5.3091	60	10.8807	0.0463742
Q9L4T0	LUXS_SALTY	S-ribosylhomocysteine lyase OS=Salmonella typhimurium (strain LT2 / SGSC1412 / ATCC 700720) GN=luxS PE=3 SV=3	19295	5.6763	544.217	4	32.1637	2.6355	23	10.8713	0.0460702
P63601	AROK_SALTY	Shikimate kinase 1 OS=Salmonella typhimurium (strain LT2 / SGSC1412 / ATCC 700720) GN=aroK PE=3 SV=2	19458	5.0786	449.382	5	39.3064	1.7468	33	10.4048	0.0460702
Q8ZMK6	SYA_SALTY	Alanine--tRNA ligase OS=Salmonella typhimurium (strain LT2 / SGSC1412 / ATCC 700720) GN=alaS PE=3 SV=1	95839	5.2954	365.309	26	43.9498	11.2707	131	10.8595	0.0460702
Q8ZM42	Q8ZM42_SALTY	Putative periplasmic protein OS=Salmonella typhimurium (strain LT2 / SGSC1412 / ATCC 700720) GN=yggN PE=4 SV=1	26248	9.4819	345.619	7	44.3515	8.7449	48	12.0149	0.0460317
P0A265	PPIC_SALTY	Peptidyl-prolyl cis-trans isomerase C OS=Salmonella typhimurium (strain LT2 / SGSC1412 / ATCC 700720) GN=ppiC PE=3 SV=2	10321	9.7515	1846.65	2	21.5054	4.9105	13	5.4893	0.0459382
Q8ZPT7	Q8ZPT7_SALTY	Putative enzyme OS=Salmonella typhimurium (strain LT2 / SGSC1412 / ATCC 700720) GN=yniC PE=4 SV=1	24277	4.749	709.49	5	37.8378	6.1438	31	7.8354	0.0459231
P26977	PUR2_SALTY	Phosphoribosylamine--glycine ligase OS=Salmonella typhimurium (strain LT2 / SGSC1412 / ATCC 700720) GN=purD PE=3 SV=1	45664	4.6743	160.257	5	18.648	11.3297	27	9.7646	0.0459081
Q8ZRC0	CLPX_SALTY	ATP-dependent Clp protease ATP-binding subunit ClpX OS=Salmonella typhimurium (strain LT2 / SGSC1412 / ATCC 700720) GN=clpX PE=3 SV=1	46147	5.0522	150.513	6	29.078	4.9752	32	11.4137	0.0457377
Q8ZQQ8	Q8ZQQ8_SALTY	Putative phospholipid-binding protein OS=Salmonella typhimurium (strain LT2 / SGSC1412 / ATCC 700720) GN=ybhB PE=4 SV=1	17061	5.4038	234.889	4	25.3165	3.1866	17	6.988	0.0455122
P67557	OPGG_SALTY	Glucans biosynthesis protein G OS=Salmonella typhimurium (strain LT2 / SGSC1412 / ATCC 700720) GN=mdoG PE=3 SV=1	57808	8.7744	258.234	12	34.638	8.3276	54	11.3704	0.0454437
Q8ZNZ7	Q8ZNZ7_SALTY	Putative IclR family transcriptional repressor OS=Salmonella typhimurium (strain LT2 / SGSC1412 / ATCC 700720) GN=kdgR PE=4 SV=1	29844	5.0391	868.766	16	54.7528	3.1326	78	10.9965	0.0452465
Q8ZRM7	DKGB_SALTY	2,5-diketo-D-gluconic acid reductase B OS=Salmonella typhimurium (strain LT2 / SGSC1412 / ATCC 700720) GN=dkgB PE=3 SV=1	29135	5.1665	312.899	8	35.206	10.5393	35	12.4086	0.0449976
Q8ZNW0	KPYK2_SALTY	Pyruvate kinase II OS=Salmonella typhimurium (strain LT2 / SGSC1412 / ATCC 700720) GN=pykA PE=3 SV=3	51354	6.1143	109.682	11	33.9583	5.0578	49	10.395	0.0446585
P64105	FABA_SALTY	3-hydroxydecanoyl-[acyl-carrier-protein] dehydratase OS=Salmonella typhimurium (strain LT2 / SGSC1412 / ATCC 700720) GN=fabA PE=3 SV=2	19034	6.3574	265.093	4	27.907	7.3286	17	11.6746	0.0445415
[truncated: 1,461 more rows]

## Sheet: WT
Accession	Entry	Description	mW (Da)	pI (pH)	PLGS Score	Peptides	Coverage (%)	Precursor RMS Mass Error (ppm)	Products	Products RMS Mass Error (ppm)	WT replicate 1 normalized abundance
[truncated: 2,416 more rows]

[truncated: 1 more sheets: sseF ]
